# Supplementary material
Source: publisher site journal article supplement (https://www.dovepress.com/article/228678)
Supplement: Supplementary file 1 [file get_supplementary_file.php]

**Supplementary Table 1** Primers for quantitative real-time PCR

| **Gene** | **Sequence(5' -> 3')** | | **Amplicon Size (bp)** |
| --- | --- | --- | --- |
| **Forward Primer** | **Reverse Primer** |
| GAPDH | GGAGCGAGATCCCTCCAAAAT | GGCTGTTGTCATACTTCTCATGG | 197 |
| EPCAM | AATCGTCAATGCCAGTGTACTT | TCTCATCGCAGTCAGGATCATAA | 178 |
| ALDH1A1 | GCACGCCAGACTTACCTGTC | CCTCCTCAGTTGCAGGATTAAAG | 129 |
| ZWINT | CACGTAGAGGCCATCAAAATTGG | CGGAGTTGTGTCCGTTTCCT | 80 |
| BUB1B | AAATGACCCTCTGGATGTTTGG | GCATAAACGCCCTAATTTAAGCC | 184 |
| NEK2 | TGCTTCGTGAACTGAAACATCC | CCAGAGTCAACTGAGTCATCACT | 195 |
| DLGAP5 | AAGTGGGTCGTTATAGACCTGA | TGCTCGAACATCACTCTCGTTAT | 167 |
| MELK | TATTCACCTCGATGATGATTGCG | AGAAAGCCTTAAACGAACTGGTT | 169 |
| CEP55 | CTTGAGGTTGAACGACAAACCA | AGCTCTTCGGATCTCTTCTTCTC | 242 |
| CKS2 | TTCGACGAACACTACGAGTACC | GGACACCAAGTCTCCTCCAC | 109 |
| KDR | GTGATCGGAAATGACACTGGAG | CATGTTGGTCACTAACAGAAGCA | 124 |

**Supplementary Table 2** Information for samples in the included GEO datasets

| **Dataset** | **Sample GEO accession** | **Sample_title** | **Sample platform id** | **Stage** | **Grade** | **Tissue type** | **surgery outcome** | **status** | **survival data** | **Sample contact country** |
| --- | --- | --- | --- | --- | --- | --- | --- | --- | --- | --- |
| GSE14001 | [GSM350609](https://www.ncbi.nlm.nih.gov/geo/query/acc.cgi?acc=GSM350609) | High grade serous ovarian carcinoma HGOV1 | GPL570 | unknown | high | Hig-grade ovarian serous carcinoma | unknown | unknown | unknown | USA |
| GSE14001 | [GSM350610](https://www.ncbi.nlm.nih.gov/geo/query/acc.cgi?acc=GSM350610) | High grade serous ovarian carcinoma HGOV2 | GPL570 | unknown | high | High-grade serous ovarian carcinoma | unknown | unknown | unknown | USA |
| GSE14001 | [GSM350612](https://www.ncbi.nlm.nih.gov/geo/query/acc.cgi?acc=GSM350612) | High grade serous ovarian carcinoma HGOV3 | GPL570 | unknown | high | High-grade ovarian serous carcinoma | unknown | unknown | unknown | USA |
| GSE14001 | [GSM350613](https://www.ncbi.nlm.nih.gov/geo/query/acc.cgi?acc=GSM350613) | High grade serous ovarian carcinoma HGOV4 | GPL570 | unknown | high | High-grrade ovarian serous carcinoma | unknown | unknown | unknown | USA |
| GSE14001 | [GSM350614](https://www.ncbi.nlm.nih.gov/geo/query/acc.cgi?acc=GSM350614) | High grade serous ovarian carcinoma HGOV5 | GPL570 | unknown | high | High-grade ovarian serous carcinoma | unknown | unknown | unknown | USA |
| GSE14001 | [GSM350615](https://www.ncbi.nlm.nih.gov/geo/query/acc.cgi?acc=GSM350615) | High grade serous ovarian carcinoma HGOV6 | GPL570 | unknown | high | High-grade ovarian serous carcinoma | unknown | unknown | unknown | USA |
| GSE14001 | [GSM350616](https://www.ncbi.nlm.nih.gov/geo/query/acc.cgi?acc=GSM350616) | High grade serous ovarian carcinoma HGOV7 | GPL570 | unknown | high | High-grade ovarian serous carcinoma | unknown | unknown | unknown | USA |
| GSE14001 | [GSM350617](https://www.ncbi.nlm.nih.gov/geo/query/acc.cgi?acc=GSM350617) | High grade serous ovarian carcinoma HGOV8 | GPL570 | unknown | high | High-grade ovarian serous carcinoma | unknown | unknown | unknown | USA |
| GSE14001 | [GSM350618](https://www.ncbi.nlm.nih.gov/geo/query/acc.cgi?acc=GSM350618) | High grade serous ovarian carcinoma HGOV9 | GPL570 | unknown | high | High-grade ovarian serous carcinoma | unknown | unknown | unknown | USA |
| GSE14001 | [GSM350619](https://www.ncbi.nlm.nih.gov/geo/query/acc.cgi?acc=GSM350619) | High grade serous ovarian carcinoma HGOV10 | GPL570 | unknown | high | High-grade ovarian serous carcinoma | unknown | unknown | unknown | USA |
| GSE14001 | [GSM351318](https://www.ncbi.nlm.nih.gov/geo/query/acc.cgi?acc=GSM351318) | Ovarian surface epithelia HOSE1 | GPL570 | N/A | N/A | Short term primary culture of human ovarian cells | N/A | unknown | unknown | USA |
| GSE14001 | [GSM349155](https://www.ncbi.nlm.nih.gov/geo/query/acc.cgi?acc=GSM349155) | Ovarian surface epithelia HOSE2 | GPL570 | N/A | N/A | short-term primary culture of human ovarian epithelial cells | N/A | unknown | unknown | USA |
| GSE14001 | [GSM351320](https://www.ncbi.nlm.nih.gov/geo/query/acc.cgi?acc=GSM351320) | Ovarian surface epithelia HOSE3 | GPL570 | N/A | N/A | Short term primary culture of human ovarian cells | N/A | unknown | unknown | USA |
| GSE18520 | [GSM461348](https://www.ncbi.nlm.nih.gov/geo/query/acc.cgi?acc=GSM461348) | Ovarian Tumor, 317 | GPL570 | late | high | papillary serous ovarian adenocarcinoma | unknown | unknown | survival data: 150 (A) | USA |
| GSE18520 | [GSM461349](https://www.ncbi.nlm.nih.gov/geo/query/acc.cgi?acc=GSM461349) | Ovarian Tumor, 332 | GPL570 | late | high | papillary serous ovarian adenocarcinoma | unknown | unknown | survival data: 7 | USA |
| GSE18520 | [GSM461350](https://www.ncbi.nlm.nih.gov/geo/query/acc.cgi?acc=GSM461350) | Ovarian Tumor, 349 | GPL570 | late | high | papillary serous ovarian adenocarcinoma | unknown | unknown | survival data: 144 (A) | USA |
| GSE18520 | [GSM461351](https://www.ncbi.nlm.nih.gov/geo/query/acc.cgi?acc=GSM461351) | Ovarian Tumor, 351 | GPL570 | late | high | papillary serous ovarian adenocarcinoma | unknown | unknown | survival data: 142 (A) | USA |
| GSE18520 | [GSM461352](https://www.ncbi.nlm.nih.gov/geo/query/acc.cgi?acc=GSM461352) | Ovarian Tumor, 386 | GPL570 | late | high | papillary serous ovarian adenocarcinoma | unknown | unknown | survival data: 95 | USA |
| GSE18520 | [GSM461353](https://www.ncbi.nlm.nih.gov/geo/query/acc.cgi?acc=GSM461353) | Ovarian Tumor, 388 | GPL570 | late | high | papillary serous ovarian adenocarcinoma | unknown | unknown | survival data: 132 (A) | USA |
| GSE18520 | [GSM461354](https://www.ncbi.nlm.nih.gov/geo/query/acc.cgi?acc=GSM461354) | Ovarian Tumor, 389 | GPL570 | late | high | papillary serous ovarian adenocarcinoma | unknown | unknown | survival data: 13 | USA |
| GSE18520 | [GSM461355](https://www.ncbi.nlm.nih.gov/geo/query/acc.cgi?acc=GSM461355) | Ovarian Tumor, 402 | GPL570 | late | high | papillary serous ovarian adenocarcinoma | unknown | unknown | survival data: 8 | USA |
| GSE18520 | [GSM461356](https://www.ncbi.nlm.nih.gov/geo/query/acc.cgi?acc=GSM461356) | Ovarian Tumor, 410 | GPL570 | late | high | papillary serous ovarian adenocarcinoma | unknown | unknown | survival data: 150 (A) | USA |
| GSE18520 | [GSM461357](https://www.ncbi.nlm.nih.gov/geo/query/acc.cgi?acc=GSM461357) | Ovarian Tumor, 412 | GPL570 | late | high | papillary serous ovarian adenocarcinoma | unknown | unknown | survival data: 113 | USA |
| GSE18520 | [GSM461358](https://www.ncbi.nlm.nih.gov/geo/query/acc.cgi?acc=GSM461358) | Ovarian Tumor, 434 | GPL570 | late | high | papillary serous ovarian adenocarcinoma | unknown | unknown | survival data: 72 | USA |
| GSE18520 | [GSM461359](https://www.ncbi.nlm.nih.gov/geo/query/acc.cgi?acc=GSM461359) | Ovarian Tumor, 467 | GPL570 | late | high | papillary serous ovarian adenocarcinoma | unknown | unknown | survival data: 11 | USA |
| GSE18520 | [GSM461360](https://www.ncbi.nlm.nih.gov/geo/query/acc.cgi?acc=GSM461360) | Ovarian Tumor, 629 | GPL570 | late | high | papillary serous ovarian adenocarcinoma | unknown | unknown | survival data: 50 (A) | USA |
| GSE18520 | [GSM461361](https://www.ncbi.nlm.nih.gov/geo/query/acc.cgi?acc=GSM461361) | Ovarian Tumor, 702 | GPL570 | late | high | papillary serous ovarian adenocarcinoma | unknown | unknown | survival data: 13 | USA |
| GSE18520 | [GSM461362](https://www.ncbi.nlm.nih.gov/geo/query/acc.cgi?acc=GSM461362) | Ovarian Tumor, 714 | GPL570 | late | high | papillary serous ovarian adenocarcinoma | unknown | unknown | survival data: 8 | USA |
| GSE18520 | [GSM461363](https://www.ncbi.nlm.nih.gov/geo/query/acc.cgi?acc=GSM461363) | Ovarian Tumor, 765 | GPL570 | late | high | papillary serous ovarian adenocarcinoma | unknown | unknown | survival data: 12 | USA |
| GSE18520 | [GSM461364](https://www.ncbi.nlm.nih.gov/geo/query/acc.cgi?acc=GSM461364) | Ovarian Tumor, 780 | GPL570 | late | high | papillary serous ovarian adenocarcinoma | unknown | unknown | survival data: 11 | USA |
| GSE18520 | [GSM461365](https://www.ncbi.nlm.nih.gov/geo/query/acc.cgi?acc=GSM461365) | Ovarian Tumor, 799 | GPL570 | late | high | papillary serous ovarian adenocarcinoma | unknown | unknown | survival data: 5 | USA |
| GSE18520 | [GSM461366](https://www.ncbi.nlm.nih.gov/geo/query/acc.cgi?acc=GSM461366) | Ovarian Tumor, 872 | GPL570 | late | high | papillary serous ovarian adenocarcinoma | unknown | unknown | survival data: 9 | USA |
| GSE18520 | [GSM461367](https://www.ncbi.nlm.nih.gov/geo/query/acc.cgi?acc=GSM461367) | Ovarian Tumor, 1231 | GPL570 | late | high | papillary serous ovarian adenocarcinoma | unknown | unknown | survival data: 15 | USA |
| GSE18520 | [GSM461368](https://www.ncbi.nlm.nih.gov/geo/query/acc.cgi?acc=GSM461368) | Ovarian Tumor, 1562 | GPL570 | late | high | papillary serous ovarian adenocarcinoma | unknown | unknown | survival data: 19 (A) | USA |
| GSE18520 | [GSM461369](https://www.ncbi.nlm.nih.gov/geo/query/acc.cgi?acc=GSM461369) | Ovarian Tumor, 1660 | GPL570 | late | high | papillary serous ovarian adenocarcinoma | unknown | unknown | survival data: 15 (A) | USA |
| GSE18520 | [GSM461370](https://www.ncbi.nlm.nih.gov/geo/query/acc.cgi?acc=GSM461370) | Ovarian Tumor, 662 | GPL570 | late | high | papillary serous ovarian adenocarcinoma | unknown | unknown | survival data: 23 | USA |
| GSE18520 | [GSM461371](https://www.ncbi.nlm.nih.gov/geo/query/acc.cgi?acc=GSM461371) | Ovarian Tumor, 800 | GPL570 | late | high | papillary serous ovarian adenocarcinoma | unknown | unknown | survival data: 36 | USA |
| GSE18520 | [GSM461372](https://www.ncbi.nlm.nih.gov/geo/query/acc.cgi?acc=GSM461372) | Ovarian Tumor, 934 | GPL570 | late | high | papillary serous ovarian adenocarcinoma | unknown | unknown | survival data: 36 (A) | USA |
| GSE18520 | [GSM461373](https://www.ncbi.nlm.nih.gov/geo/query/acc.cgi?acc=GSM461373) | Ovarian Tumor, 324 | GPL570 | late | high | papillary serous ovarian adenocarcinoma | unknown | unknown | survival data: 59 | USA |
| GSE18520 | [GSM461374](https://www.ncbi.nlm.nih.gov/geo/query/acc.cgi?acc=GSM461374) | Ovarian Tumor, 377 | GPL570 | late | high | papillary serous ovarian adenocarcinoma | unknown | unknown | survival data: 12 | USA |
| GSE18520 | [GSM461375](https://www.ncbi.nlm.nih.gov/geo/query/acc.cgi?acc=GSM461375) | Ovarian Tumor, 380 | GPL570 | late | high | papillary serous ovarian adenocarcinoma | unknown | unknown | survival data: 57 | USA |
| GSE18520 | [GSM461376](https://www.ncbi.nlm.nih.gov/geo/query/acc.cgi?acc=GSM461376) | Ovarian Tumor, 396 | GPL570 | late | high | papillary serous ovarian adenocarcinoma | unknown | unknown | survival data: 21 | USA |
| GSE18520 | [GSM461377](https://www.ncbi.nlm.nih.gov/geo/query/acc.cgi?acc=GSM461377) | Ovarian Tumor, 443 | GPL570 | late | high | papillary serous ovarian adenocarcinoma | unknown | unknown | survival data: 111 | USA |
| GSE18520 | [GSM461378](https://www.ncbi.nlm.nih.gov/geo/query/acc.cgi?acc=GSM461378) | Ovarian Tumor, 744 | GPL570 | late | high | papillary serous ovarian adenocarcinoma | unknown | unknown | survival data: 14 | USA |
| GSE18520 | [GSM461379](https://www.ncbi.nlm.nih.gov/geo/query/acc.cgi?acc=GSM461379) | Ovarian Tumor, 312 | GPL570 | late | high | papillary serous ovarian adenocarcinoma | unknown | unknown | survival data: 48 | USA |
| GSE18520 | [GSM461380](https://www.ncbi.nlm.nih.gov/geo/query/acc.cgi?acc=GSM461380) | Ovarian Tumor, 321 | GPL570 | late | high | papillary serous ovarian adenocarcinoma | unknown | unknown | survival data: 45 | USA |
| GSE18520 | [GSM461381](https://www.ncbi.nlm.nih.gov/geo/query/acc.cgi?acc=GSM461381) | Ovarian Tumor, 367 | GPL570 | late | high | papillary serous ovarian adenocarcinoma | unknown | unknown | survival data: 16 | USA |
| GSE18520 | [GSM461382](https://www.ncbi.nlm.nih.gov/geo/query/acc.cgi?acc=GSM461382) | Ovarian Tumor, 394 | GPL570 | late | high | papillary serous ovarian adenocarcinoma | unknown | unknown | survival data: 16 | USA |
| GSE18520 | [GSM461383](https://www.ncbi.nlm.nih.gov/geo/query/acc.cgi?acc=GSM461383) | Ovarian Tumor, 477 | GPL570 | late | high | papillary serous ovarian adenocarcinoma | unknown | unknown | survival data: 21 | USA |
| GSE18520 | [GSM461384](https://www.ncbi.nlm.nih.gov/geo/query/acc.cgi?acc=GSM461384) | Ovarian Tumor, 656 | GPL570 | late | high | papillary serous ovarian adenocarcinoma | unknown | unknown | survival data: 25 | USA |
| GSE18520 | [GSM461385](https://www.ncbi.nlm.nih.gov/geo/query/acc.cgi?acc=GSM461385) | Ovarian Tumor, 694 | GPL570 | late | high | papillary serous ovarian adenocarcinoma | unknown | unknown | survival data: 33 | USA |
| GSE18520 | [GSM461386](https://www.ncbi.nlm.nih.gov/geo/query/acc.cgi?acc=GSM461386) | Ovarian Tumor, 715 | GPL570 | late | high | papillary serous ovarian adenocarcinoma | unknown | unknown | survival data: 33 | USA |
| GSE18520 | [GSM461387](https://www.ncbi.nlm.nih.gov/geo/query/acc.cgi?acc=GSM461387) | Ovarian Tumor, 786 | GPL570 | late | high | papillary serous ovarian adenocarcinoma | unknown | unknown | survival data: 48 (A) | USA |
| GSE18520 | [GSM461388](https://www.ncbi.nlm.nih.gov/geo/query/acc.cgi?acc=GSM461388) | Ovarian Tumor, 794 | GPL570 | late | high | papillary serous ovarian adenocarcinoma | unknown | unknown | survival data: 15 | USA |
| GSE18520 | [GSM461389](https://www.ncbi.nlm.nih.gov/geo/query/acc.cgi?acc=GSM461389) | Ovarian Tumor, 970 | GPL570 | late | high | papillary serous ovarian adenocarcinoma | unknown | unknown | survival data: 18 | USA |
| GSE18520 | [GSM461390](https://www.ncbi.nlm.nih.gov/geo/query/acc.cgi?acc=GSM461390) | Ovarian Tumor, 1109 | GPL570 | late | high | papillary serous ovarian adenocarcinoma | unknown | unknown | survival data: 34 (A) | USA |
| GSE18520 | [GSM461391](https://www.ncbi.nlm.nih.gov/geo/query/acc.cgi?acc=GSM461391) | Ovarian Tumor, 1214 | GPL570 | late | high | papillary serous ovarian adenocarcinoma | unknown | unknown | survival data: 17 | USA |
| GSE18520 | [GSM461392](https://www.ncbi.nlm.nih.gov/geo/query/acc.cgi?acc=GSM461392) | Ovarian Tumor, 345 | GPL570 | late | high | papillary serous ovarian adenocarcinoma | unknown | unknown | survival data: 18 | USA |
| GSE18520 | [GSM461393](https://www.ncbi.nlm.nih.gov/geo/query/acc.cgi?acc=GSM461393) | Ovarian Tumor, 358 | GPL570 | late | high | papillary serous ovarian adenocarcinoma | unknown | unknown | survival data: 21 | USA |
| GSE18520 | [GSM461394](https://www.ncbi.nlm.nih.gov/geo/query/acc.cgi?acc=GSM461394) | Ovarian Tumor, 461 | GPL570 | late | high | papillary serous ovarian adenocarcinoma | unknown | unknown | survival data: 32 | USA |
| GSE18520 | [GSM461395](https://www.ncbi.nlm.nih.gov/geo/query/acc.cgi?acc=GSM461395) | Ovarian Tumor, 486 | GPL570 | late | high | papillary serous ovarian adenocarcinoma | unknown | unknown | survival data: 21 | USA |
| GSE18520 | [GSM461396](https://www.ncbi.nlm.nih.gov/geo/query/acc.cgi?acc=GSM461396) | Ovarian Tumor, 631 | GPL570 | late | high | papillary serous ovarian adenocarcinoma | unknown | unknown | survival data: 30 | USA |
| GSE18520 | [GSM461397](https://www.ncbi.nlm.nih.gov/geo/query/acc.cgi?acc=GSM461397) | Ovarian Tumor, 692 | GPL570 | late | high | papillary serous ovarian adenocarcinoma | unknown | unknown | survival data: 35 | USA |
| GSE18520 | [GSM461398](https://www.ncbi.nlm.nih.gov/geo/query/acc.cgi?acc=GSM461398) | Ovarian Tumor, 718 | GPL570 | late | high | papillary serous ovarian adenocarcinoma | unknown | unknown | survival data: 26 | USA |
| GSE18520 | [GSM461399](https://www.ncbi.nlm.nih.gov/geo/query/acc.cgi?acc=GSM461399) | Ovarian Tumor, 778 | GPL570 | late | high | papillary serous ovarian adenocarcinoma | unknown | unknown | survival data: 16 | USA |
| GSE18520 | [GSM461400](https://www.ncbi.nlm.nih.gov/geo/query/acc.cgi?acc=GSM461400) | Ovarian Tumor, 1993 | GPL570 | late | high | papillary serous ovarian adenocarcinoma | unknown | unknown | survival data: 11 (A) | USA |
| GSE18520 | [GSM462643](https://www.ncbi.nlm.nih.gov/geo/query/acc.cgi?acc=GSM462643) | Normal Ovary, 2008 | GPL570 | N/A | N/A | normal ovarian surface epithelium (OSE) | N/A | unknown | unknown | USA |
| GSE18520 | [GSM462644](https://www.ncbi.nlm.nih.gov/geo/query/acc.cgi?acc=GSM462644) | Normal Ovary, 2061 | GPL570 | N/A | N/A | normal ovarian surface epithelium (OSE) | N/A | unknown | unknown | USA |
| GSE18520 | [GSM462645](https://www.ncbi.nlm.nih.gov/geo/query/acc.cgi?acc=GSM462645) | Normal Ovary, 2064 | GPL570 | N/A | N/A | normal ovarian surface epithelium (OSE) | N/A | unknown | unknown | USA |
| GSE18520 | [GSM462646](https://www.ncbi.nlm.nih.gov/geo/query/acc.cgi?acc=GSM462646) | Normal Ovary, 2085 | GPL570 | N/A | N/A | normal ovarian surface epithelium (OSE) | N/A | unknown | unknown | USA |
| GSE18520 | [GSM462647](https://www.ncbi.nlm.nih.gov/geo/query/acc.cgi?acc=GSM462647) | Normal Ovary, 2225 | GPL570 | N/A | N/A | normal ovarian surface epithelium (OSE) | N/A | unknown | unknown | USA |
| GSE18520 | [GSM462648](https://www.ncbi.nlm.nih.gov/geo/query/acc.cgi?acc=GSM462648) | Normal Ovary, 2226 | GPL570 | N/A | N/A | normal ovarian surface epithelium (OSE) | N/A | unknown | unknown | USA |
| GSE18520 | [GSM462649](https://www.ncbi.nlm.nih.gov/geo/query/acc.cgi?acc=GSM462649) | Normal Ovary, 2228 | GPL570 | N/A | N/A | normal ovarian surface epithelium (OSE) | N/A | unknown | unknown | USA |
| GSE18520 | [GSM462650](https://www.ncbi.nlm.nih.gov/geo/query/acc.cgi?acc=GSM462650) | Normal Ovary, 2230 | GPL570 | N/A | N/A | normal ovarian surface epithelium (OSE) | N/A | unknown | unknown | USA |
| GSE18520 | [GSM462651](https://www.ncbi.nlm.nih.gov/geo/query/acc.cgi?acc=GSM462651) | Normal Ovary, 2234 | GPL570 | N/A | N/A | normal ovarian surface epithelium (OSE) | N/A | unknown | unknown | USA |
| GSE18520 | [GSM462652](https://www.ncbi.nlm.nih.gov/geo/query/acc.cgi?acc=GSM462652) | Normal Ovary, 2237 | GPL570 | N/A | N/A | normal ovarian surface epithelium (OSE) | N/A | unknown | unknown | USA |
| GSE26712 | [GSM657529](https://www.ncbi.nlm.nih.gov/geo/query/acc.cgi?acc=GSM657529) | Ovarian Cancer SO10 | GPL96 | late | high | Late-stage high-grade ovarian cancer | Optimal | AWD (alive with disease) | survival years: 7.48 | USA |
| GSE26712 | [GSM657530](https://www.ncbi.nlm.nih.gov/geo/query/acc.cgi?acc=GSM657530) | Ovarian Cancer SO100 | GPL96 | late | high | Late-stage high-grade ovarian cancer | Optimal | NED (no evidence of disease) | survival years: 4.51 | USA |
| GSE26712 | [GSM657531](https://www.ncbi.nlm.nih.gov/geo/query/acc.cgi?acc=GSM657531) | Ovarian Cancer SO103 | GPL96 | late | high | Late-stage high-grade ovarian cancer | Optimal | NED (no evidence of disease) | survival years: 4.38 | USA |
| GSE26712 | [GSM657532](https://www.ncbi.nlm.nih.gov/geo/query/acc.cgi?acc=GSM657532) | Ovarian Cancer SO106 | GPL96 | late | high | Late-stage high-grade ovarian cancer | Optimal | DOD (dead of disease) | survival years: 1.72 | USA |
| GSE26712 | [GSM657533](https://www.ncbi.nlm.nih.gov/geo/query/acc.cgi?acc=GSM657533) | Ovarian Cancer SO108 | GPL96 | late | high | Late-stage high-grade ovarian cancer | Optimal | AWD (alive with disease) | survival years: 3.99 | USA |
| GSE26712 | [GSM657534](https://www.ncbi.nlm.nih.gov/geo/query/acc.cgi?acc=GSM657534) | Ovarian Cancer SO11 | GPL96 | late | high | Late-stage high-grade ovarian cancer | Optimal | DOD (dead of disease) | survival years: 2.51 | USA |
| GSE26712 | [GSM657535](https://www.ncbi.nlm.nih.gov/geo/query/acc.cgi?acc=GSM657535) | Ovarian Cancer SO113 | GPL96 | late | high | Late-stage high-grade ovarian cancer | Optimal | NED (no evidence of disease) | survival years: 3.77 | USA |
| GSE26712 | [GSM657536](https://www.ncbi.nlm.nih.gov/geo/query/acc.cgi?acc=GSM657536) | Ovarian Cancer SO115 | GPL96 | late | high | Late-stage high-grade ovarian cancer | Optimal | DOD (dead of disease) | survival years: 2.45 | USA |
| GSE26712 | [GSM657537](https://www.ncbi.nlm.nih.gov/geo/query/acc.cgi?acc=GSM657537) | Ovarian Cancer SO116 | GPL96 | late | high | Late-stage high-grade ovarian cancer | Optimal | AWD (alive with disease) | survival years: 3.58 | USA |
| GSE26712 | [GSM657538](https://www.ncbi.nlm.nih.gov/geo/query/acc.cgi?acc=GSM657538) | Ovarian Cancer SO117 | GPL96 | late | high | Late-stage high-grade ovarian cancer | Optimal | AWD (alive with disease) | survival years: 3.53 | USA |
| GSE26712 | [GSM657539](https://www.ncbi.nlm.nih.gov/geo/query/acc.cgi?acc=GSM657539) | Ovarian Cancer SO118 | GPL96 | late | high | Late-stage high-grade ovarian cancer | Suboptimal | AWD (alive with disease) | survival years: 3.49 | USA |
| GSE26712 | [GSM657540](https://www.ncbi.nlm.nih.gov/geo/query/acc.cgi?acc=GSM657540) | Ovarian Cancer SO12 | GPL96 | late | high | Late-stage high-grade ovarian cancer | Optimal | DOD (dead of disease) | survival years: 0.71 | USA |
| GSE26712 | [GSM657541](https://www.ncbi.nlm.nih.gov/geo/query/acc.cgi?acc=GSM657541) | Ovarian Cancer SO121 | GPL96 | late | high | Late-stage high-grade ovarian cancer | Optimal | NED (no evidence of disease) | survival years: 3.3 | USA |
| GSE26712 | [GSM657542](https://www.ncbi.nlm.nih.gov/geo/query/acc.cgi?acc=GSM657542) | Ovarian Cancer SO122 | GPL96 | late | high | Late-stage high-grade ovarian cancer | Optimal | DOD (dead of disease) | survival years: 2.3 | USA |
| GSE26712 | [GSM657543](https://www.ncbi.nlm.nih.gov/geo/query/acc.cgi?acc=GSM657543) | Ovarian Cancer SO124 | GPL96 | late | high | Late-stage high-grade ovarian cancer | Optimal | NED (no evidence of disease) | survival years: 3.26 | USA |
| GSE26712 | [GSM657544](https://www.ncbi.nlm.nih.gov/geo/query/acc.cgi?acc=GSM657544) | Ovarian Cancer SO129 | GPL96 | late | high | Late-stage high-grade ovarian cancer | Optimal | NED (no evidence of disease) | survival years: 2.82 | USA |
| GSE26712 | [GSM657545](https://www.ncbi.nlm.nih.gov/geo/query/acc.cgi?acc=GSM657545) | Ovarian Cancer SO13 | GPL96 | late | high | Late-stage high-grade ovarian cancer | Suboptimal | NED (no evidence of disease) | survival years: 7.33 | USA |
| GSE26712 | [GSM657546](https://www.ncbi.nlm.nih.gov/geo/query/acc.cgi?acc=GSM657546) | Ovarian Cancer SO131 | GPL96 | late | high | Late-stage high-grade ovarian cancer | Optimal | NED (no evidence of disease) | survival years: 2.94 | USA |
| GSE26712 | [GSM657547](https://www.ncbi.nlm.nih.gov/geo/query/acc.cgi?acc=GSM657547) | Ovarian Cancer SO134 | GPL96 | late | high | Late-stage high-grade ovarian cancer | Optimal | DOD (dead of disease) | survival years: 1.03 | USA |
| GSE26712 | [GSM657548](https://www.ncbi.nlm.nih.gov/geo/query/acc.cgi?acc=GSM657548) | Ovarian Cancer SO135 | GPL96 | late | high | Late-stage high-grade ovarian cancer | Optimal | DOD (dead of disease) | survival years: 3.55 | USA |
| GSE26712 | [GSM657549](https://www.ncbi.nlm.nih.gov/geo/query/acc.cgi?acc=GSM657549) | Ovarian Cancer SO137 | GPL96 | late | high | Late-stage high-grade ovarian cancer | Suboptimal | DOD (dead of disease) | survival years: 0.17 | USA |
| GSE26712 | [GSM657550](https://www.ncbi.nlm.nih.gov/geo/query/acc.cgi?acc=GSM657550) | Ovarian Cancer SO141 | GPL96 | late | high | Late-stage high-grade ovarian cancer | Suboptimal | DOD (dead of disease) | survival years: 1.47 | USA |
| GSE26712 | [GSM657551](https://www.ncbi.nlm.nih.gov/geo/query/acc.cgi?acc=GSM657551) | Ovarian Cancer SO143 | GPL96 | late | high | Late-stage high-grade ovarian cancer | Optimal | AWD (alive with disease) | survival years: 6.86 | USA |
| GSE26712 | [GSM657552](https://www.ncbi.nlm.nih.gov/geo/query/acc.cgi?acc=GSM657552) | Ovarian Cancer SO148 | GPL96 | late | high | Late-stage high-grade ovarian cancer | Suboptimal | DOD (dead of disease) | survival years: 2.37 | USA |
| GSE26712 | [GSM657553](https://www.ncbi.nlm.nih.gov/geo/query/acc.cgi?acc=GSM657553) | Ovarian Cancer SO154 | GPL96 | late | high | Late-stage high-grade ovarian cancer | Suboptimal | AWD (alive with disease) | survival years: 3.7 | USA |
| GSE26712 | [GSM657554](https://www.ncbi.nlm.nih.gov/geo/query/acc.cgi?acc=GSM657554) | Ovarian Cancer SO16 | GPL96 | late | high | Late-stage high-grade ovarian cancer | Suboptimal | DOD (dead of disease) | survival years: 6.29 | USA |
| GSE26712 | [GSM657555](https://www.ncbi.nlm.nih.gov/geo/query/acc.cgi?acc=GSM657555) | Ovarian Cancer SO166 | GPL96 | late | high | Late-stage high-grade ovarian cancer | Optimal | NED (no evidence of disease) | survival years: 2.93 | USA |
| GSE26712 | [GSM657556](https://www.ncbi.nlm.nih.gov/geo/query/acc.cgi?acc=GSM657556) | Ovarian Cancer SO17 | GPL96 | late | high | Late-stage high-grade ovarian cancer | Suboptimal | DOD (dead of disease) | survival years: 3.83 | USA |
| GSE26712 | [GSM657557](https://www.ncbi.nlm.nih.gov/geo/query/acc.cgi?acc=GSM657557) | Ovarian Cancer SO173 | GPL96 | late | high | Late-stage high-grade ovarian cancer | Optimal | AWD (alive with disease) | survival years: 2.71 | USA |
| GSE26712 | [GSM657558](https://www.ncbi.nlm.nih.gov/geo/query/acc.cgi?acc=GSM657558) | Ovarian Cancer SO174 | GPL96 | late | high | Late-stage high-grade ovarian cancer | Suboptimal | DOD (dead of disease) | survival years: 2.84 | USA |
| GSE26712 | [GSM657559](https://www.ncbi.nlm.nih.gov/geo/query/acc.cgi?acc=GSM657559) | Ovarian Cancer SO18 | GPL96 | late | high | Late-stage high-grade ovarian cancer | Optimal | DOD (dead of disease) | survival years: 6.3 | USA |
| GSE26712 | [GSM657560](https://www.ncbi.nlm.nih.gov/geo/query/acc.cgi?acc=GSM657560) | Ovarian Cancer SO181 | GPL96 | late | high | Late-stage high-grade ovarian cancer | Optimal | NED (no evidence of disease) | survival years: 2.1 | USA |
| GSE26712 | [GSM657561](https://www.ncbi.nlm.nih.gov/geo/query/acc.cgi?acc=GSM657561) | Ovarian Cancer SO184 | GPL96 | late | high | Late-stage high-grade ovarian cancer | Optimal | NED (no evidence of disease) | survival years: 2.43 | USA |
| GSE26712 | [GSM657562](https://www.ncbi.nlm.nih.gov/geo/query/acc.cgi?acc=GSM657562) | Ovarian Cancer SO185 | GPL96 | late | high | Late-stage high-grade ovarian cancer | Optimal | NED (no evidence of disease) | survival years: 2.37 | USA |
| GSE26712 | [GSM657563](https://www.ncbi.nlm.nih.gov/geo/query/acc.cgi?acc=GSM657563) | Ovarian Cancer SO187 | GPL96 | late | high | Late-stage high-grade ovarian cancer | Optimal | AWD (alive with disease) | survival years: 2.48 | USA |
| GSE26712 | [GSM657564](https://www.ncbi.nlm.nih.gov/geo/query/acc.cgi?acc=GSM657564) | Ovarian Cancer SO189 | GPL96 | late | high | Late-stage high-grade ovarian cancer | Optimal | NED (no evidence of disease) | survival years: 2.3 | USA |
| GSE26712 | [GSM657565](https://www.ncbi.nlm.nih.gov/geo/query/acc.cgi?acc=GSM657565) | Ovarian Cancer SO190 | GPL96 | late | high | Late-stage high-grade ovarian cancer | Optimal | DOD (dead of disease) | survival years: 2.16 | USA |
| GSE26712 | [GSM657566](https://www.ncbi.nlm.nih.gov/geo/query/acc.cgi?acc=GSM657566) | Ovarian Cancer SO193 | GPL96 | late | high | Late-stage high-grade ovarian cancer | Optimal | AWD (alive with disease) | survival years: 2.27 | USA |
| GSE26712 | [GSM657567](https://www.ncbi.nlm.nih.gov/geo/query/acc.cgi?acc=GSM657567) | Ovarian Cancer SO194 | GPL96 | late | high | Late-stage high-grade ovarian cancer | Optimal | AWD (alive with disease) | survival years: 2.23 | USA |
| GSE26712 | [GSM657568](https://www.ncbi.nlm.nih.gov/geo/query/acc.cgi?acc=GSM657568) | Ovarian Cancer SO196 | GPL96 | late | high | Late-stage high-grade ovarian cancer | Optimal | DOD (dead of disease) | survival years: 1.28 | USA |
| GSE26712 | [GSM657569](https://www.ncbi.nlm.nih.gov/geo/query/acc.cgi?acc=GSM657569) | Ovarian Cancer SO197 | GPL96 | late | high | Late-stage high-grade ovarian cancer | Optimal | AWD (alive with disease) | survival years: 2.16 | USA |
| GSE26712 | [GSM657570](https://www.ncbi.nlm.nih.gov/geo/query/acc.cgi?acc=GSM657570) | Ovarian Cancer SO2 | GPL96 | late | high | Late-stage high-grade ovarian cancer | Suboptimal | DOD (dead of disease) | survival years: 2.83 | USA |
| GSE26712 | [GSM657571](https://www.ncbi.nlm.nih.gov/geo/query/acc.cgi?acc=GSM657571) | Ovarian Cancer SO200 | GPL96 | late | high | Late-stage high-grade ovarian cancer | Optimal | AWD (alive with disease) | survival years: 2.15 | USA |
| GSE26712 | [GSM657572](https://www.ncbi.nlm.nih.gov/geo/query/acc.cgi?acc=GSM657572) | Ovarian Cancer SO201 | GPL96 | late | high | Late-stage high-grade ovarian cancer | Optimal | AWD (alive with disease) | survival years: 2.06 | USA |
| GSE26712 | [GSM657573](https://www.ncbi.nlm.nih.gov/geo/query/acc.cgi?acc=GSM657573) | Ovarian Cancer SO203 | GPL96 | late | high | Late-stage high-grade ovarian cancer | Optimal | DOD (dead of disease) | survival years: 1.59 | USA |
| GSE26712 | [GSM657574](https://www.ncbi.nlm.nih.gov/geo/query/acc.cgi?acc=GSM657574) | Ovarian Cancer SO205 | GPL96 | late | high | Late-stage high-grade ovarian cancer | Optimal | NED (no evidence of disease) | survival years: 1.89 | USA |
| GSE26712 | [GSM657575](https://www.ncbi.nlm.nih.gov/geo/query/acc.cgi?acc=GSM657575) | Ovarian Cancer SO21 | GPL96 | late | high | Late-stage high-grade ovarian cancer | Optimal | DOD (dead of disease) | survival years: 0.56 | USA |
| GSE26712 | [GSM657576](https://www.ncbi.nlm.nih.gov/geo/query/acc.cgi?acc=GSM657576) | Ovarian Cancer SO211 | GPL96 | late | high | Late-stage high-grade ovarian cancer | Suboptimal | DOD (dead of disease) | survival years: 4.94 | USA |
| GSE26712 | [GSM657577](https://www.ncbi.nlm.nih.gov/geo/query/acc.cgi?acc=GSM657577) | Ovarian Cancer SO214 | GPL96 | late | high | Late-stage high-grade ovarian cancer | Suboptimal | DOD (dead of disease) | survival years: 2.96 | USA |
| GSE26712 | [GSM657578](https://www.ncbi.nlm.nih.gov/geo/query/acc.cgi?acc=GSM657578) | Ovarian Cancer SO216 | GPL96 | late | high | Late-stage high-grade ovarian cancer | Suboptimal | DOD (dead of disease) | survival years: 1.75 | USA |
| GSE26712 | [GSM657579](https://www.ncbi.nlm.nih.gov/geo/query/acc.cgi?acc=GSM657579) | Ovarian Cancer SO217 | GPL96 | late | high | Late-stage high-grade ovarian cancer | Suboptimal | DOD (dead of disease) | survival years: 1.91 | USA |
| GSE26712 | [GSM657580](https://www.ncbi.nlm.nih.gov/geo/query/acc.cgi?acc=GSM657580) | Ovarian Cancer SO218 | GPL96 | late | high | Late-stage high-grade ovarian cancer | Optimal | DOD (dead of disease) | survival years: 4.6 | USA |
| GSE26712 | [GSM657581](https://www.ncbi.nlm.nih.gov/geo/query/acc.cgi?acc=GSM657581) | Ovarian Cancer SO224 | GPL96 | late | high | Late-stage high-grade ovarian cancer | Suboptimal | DOD (dead of disease) | survival years: 3.18 | USA |
| GSE26712 | [GSM657582](https://www.ncbi.nlm.nih.gov/geo/query/acc.cgi?acc=GSM657582) | Ovarian Cancer SO225 | GPL96 | late | high | Late-stage high-grade ovarian cancer | Optimal | DOD (dead of disease) | survival years: 8.8 | USA |
| GSE26712 | [GSM657583](https://www.ncbi.nlm.nih.gov/geo/query/acc.cgi?acc=GSM657583) | Ovarian Cancer SO227 | GPL96 | late | high | Late-stage high-grade ovarian cancer | Suboptimal | DOD (dead of disease) | survival years: 5.68 | USA |
| GSE26712 | [GSM657584](https://www.ncbi.nlm.nih.gov/geo/query/acc.cgi?acc=GSM657584) | Ovarian Cancer SO228 | GPL96 | late | high | Late-stage high-grade ovarian cancer | Optimal | DOD (dead of disease) | survival years: 6.75 | USA |
| GSE26712 | [GSM657585](https://www.ncbi.nlm.nih.gov/geo/query/acc.cgi?acc=GSM657585) | Ovarian Cancer SO229 | GPL96 | late | high | Late-stage high-grade ovarian cancer | Suboptimal | DOD (dead of disease) | survival years: 0.86 | USA |
| GSE26712 | [GSM657586](https://www.ncbi.nlm.nih.gov/geo/query/acc.cgi?acc=GSM657586) | Ovarian Cancer SO23 | GPL96 | late | high | Late-stage high-grade ovarian cancer | Optimal | NED (no evidence of disease) | survival years: 6.91 | USA |
| GSE26712 | [GSM657587](https://www.ncbi.nlm.nih.gov/geo/query/acc.cgi?acc=GSM657587) | Ovarian Cancer SO230 | GPL96 | late | high | Late-stage high-grade ovarian cancer | Optimal | DOD (dead of disease) | survival years: 3.64 | USA |
| GSE26712 | [GSM657588](https://www.ncbi.nlm.nih.gov/geo/query/acc.cgi?acc=GSM657588) | Ovarian Cancer SO231 | GPL96 | late | high | Late-stage high-grade ovarian cancer | Optimal | DOD (dead of disease) | survival years: 5.15 | USA |
| GSE26712 | [GSM657589](https://www.ncbi.nlm.nih.gov/geo/query/acc.cgi?acc=GSM657589) | Ovarian Cancer SO235 | GPL96 | late | high | Late-stage high-grade ovarian cancer | Suboptimal | DOD (dead of disease) | survival years: 0.62 | USA |
| GSE26712 | [GSM657590](https://www.ncbi.nlm.nih.gov/geo/query/acc.cgi?acc=GSM657590) | Ovarian Cancer SO236 | GPL96 | late | high | Late-stage high-grade ovarian cancer | Optimal | NED (no evidence of disease) | survival years: 13.5 | USA |
| GSE26712 | [GSM657591](https://www.ncbi.nlm.nih.gov/geo/query/acc.cgi?acc=GSM657591) | Ovarian Cancer SO237 | GPL96 | late | high | Late-stage high-grade ovarian cancer | Suboptimal | DOD (dead of disease) | survival years: 0.59 | USA |
| GSE26712 | [GSM657592](https://www.ncbi.nlm.nih.gov/geo/query/acc.cgi?acc=GSM657592) | Ovarian Cancer SO241 | GPL96 | late | high | Late-stage high-grade ovarian cancer | Suboptimal | DOD (dead of disease) | survival years: 3.12 | USA |
| GSE26712 | [GSM657593](https://www.ncbi.nlm.nih.gov/geo/query/acc.cgi?acc=GSM657593) | Ovarian Cancer SO242 | GPL96 | late | high | Late-stage high-grade ovarian cancer | Suboptimal | DOD (dead of disease) | survival years: 0.21 | USA |
| GSE26712 | [GSM657594](https://www.ncbi.nlm.nih.gov/geo/query/acc.cgi?acc=GSM657594) | Ovarian Cancer SO243 | GPL96 | late | high | Late-stage high-grade ovarian cancer | Optimal | NED (no evidence of disease) | survival years: 13.1 | USA |
| GSE26712 | [GSM657595](https://www.ncbi.nlm.nih.gov/geo/query/acc.cgi?acc=GSM657595) | Ovarian Cancer SO244 | GPL96 | late | high | Late-stage high-grade ovarian cancer | Suboptimal | DOD (dead of disease) | survival years: 0.99 | USA |
| GSE26712 | [GSM657596](https://www.ncbi.nlm.nih.gov/geo/query/acc.cgi?acc=GSM657596) | Ovarian Cancer SO246 | GPL96 | late | high | Late-stage high-grade ovarian cancer | Optimal | DOD (dead of disease) | survival years: 3.95 | USA |
| GSE26712 | [GSM657597](https://www.ncbi.nlm.nih.gov/geo/query/acc.cgi?acc=GSM657597) | Ovarian Cancer SO247 | GPL96 | late | high | Late-stage high-grade ovarian cancer | Suboptimal | DOD (dead of disease) | survival years: 5.34 | USA |
| GSE26712 | [GSM657598](https://www.ncbi.nlm.nih.gov/geo/query/acc.cgi?acc=GSM657598) | Ovarian Cancer SO249 | GPL96 | late | high | Late-stage high-grade ovarian cancer | Suboptimal | DOD (dead of disease) | survival years: 6.83 | USA |
| GSE26712 | [GSM657599](https://www.ncbi.nlm.nih.gov/geo/query/acc.cgi?acc=GSM657599) | Ovarian Cancer SO25 | GPL96 | late | high | Late-stage high-grade ovarian cancer | Optimal | DOD (dead of disease) | survival years: 3.5 | USA |
| GSE26712 | [GSM657600](https://www.ncbi.nlm.nih.gov/geo/query/acc.cgi?acc=GSM657600) | Ovarian Cancer SO250 | GPL96 | late | high | Late-stage high-grade ovarian cancer | Suboptimal | DOD (dead of disease) | survival years: 8.64 | USA |
| GSE26712 | [GSM657601](https://www.ncbi.nlm.nih.gov/geo/query/acc.cgi?acc=GSM657601) | Ovarian Cancer SO256 | GPL96 | late | high | Late-stage high-grade ovarian cancer | Suboptimal | DOD (dead of disease) | survival years: 1.94 | USA |
| GSE26712 | [GSM657602](https://www.ncbi.nlm.nih.gov/geo/query/acc.cgi?acc=GSM657602) | Ovarian Cancer SO257 | GPL96 | late | high | Late-stage high-grade ovarian cancer | Suboptimal | DOD (dead of disease) | survival years: 2.2 | USA |
| GSE26712 | [GSM657603](https://www.ncbi.nlm.nih.gov/geo/query/acc.cgi?acc=GSM657603) | Ovarian Cancer SO258 | GPL96 | late | high | Late-stage high-grade ovarian cancer | Suboptimal | DOD (dead of disease) | survival years: 1.72 | USA |
| GSE26712 | [GSM657604](https://www.ncbi.nlm.nih.gov/geo/query/acc.cgi?acc=GSM657604) | Ovarian Cancer SO261 | GPL96 | late | high | Late-stage high-grade ovarian cancer | Suboptimal | DOD (dead of disease) | survival years: 0.98 | USA |
| GSE26712 | [GSM657605](https://www.ncbi.nlm.nih.gov/geo/query/acc.cgi?acc=GSM657605) | Ovarian Cancer SO262 | GPL96 | late | high | Late-stage high-grade ovarian cancer | Suboptimal | DOD (dead of disease) | survival years: 7.88 | USA |
| GSE26712 | [GSM657606](https://www.ncbi.nlm.nih.gov/geo/query/acc.cgi?acc=GSM657606) | Ovarian Cancer SO263 | GPL96 | late | high | Late-stage high-grade ovarian cancer | Suboptimal | DOD (dead of disease) | survival years: 3.93 | USA |
| GSE26712 | [GSM657607](https://www.ncbi.nlm.nih.gov/geo/query/acc.cgi?acc=GSM657607) | Ovarian Cancer SO265 | GPL96 | late | high | Late-stage high-grade ovarian cancer | Suboptimal | DOD (dead of disease) | survival years: 0.33 | USA |
| GSE26712 | [GSM657608](https://www.ncbi.nlm.nih.gov/geo/query/acc.cgi?acc=GSM657608) | Ovarian Cancer SO267 | GPL96 | late | high | Late-stage high-grade ovarian cancer | Suboptimal | DOD (dead of disease) | survival years: 1.3 | USA |
| GSE26712 | [GSM657609](https://www.ncbi.nlm.nih.gov/geo/query/acc.cgi?acc=GSM657609) | Ovarian Cancer SO268 | GPL96 | late | high | Late-stage high-grade ovarian cancer | Optimal | DOD (dead of disease) | survival years: 9.22 | USA |
| GSE26712 | [GSM657610](https://www.ncbi.nlm.nih.gov/geo/query/acc.cgi?acc=GSM657610) | Ovarian Cancer SO272 | GPL96 | late | high | Late-stage high-grade ovarian cancer | Suboptimal | DOD (dead of disease) | survival years: 3.75 | USA |
| GSE26712 | [GSM657611](https://www.ncbi.nlm.nih.gov/geo/query/acc.cgi?acc=GSM657611) | Ovarian Cancer SO273 | GPL96 | late | high | Late-stage high-grade ovarian cancer | Optimal | DOD (dead of disease) | survival years: 2.52 | USA |
| GSE26712 | [GSM657612](https://www.ncbi.nlm.nih.gov/geo/query/acc.cgi?acc=GSM657612) | Ovarian Cancer SO278 | GPL96 | late | high | Late-stage high-grade ovarian cancer | Optimal | DOD (dead of disease) | survival years: 4.53 | USA |
| GSE26712 | [GSM657613](https://www.ncbi.nlm.nih.gov/geo/query/acc.cgi?acc=GSM657613) | Ovarian Cancer SO279 | GPL96 | late | high | Late-stage high-grade ovarian cancer | Suboptimal | DOD (dead of disease) | survival years: 0.92 | USA |
| GSE26712 | [GSM657614](https://www.ncbi.nlm.nih.gov/geo/query/acc.cgi?acc=GSM657614) | Ovarian Cancer SO282 | GPL96 | late | high | Late-stage high-grade ovarian cancer | Suboptimal | DOD (dead of disease) | survival years: 2.4 | USA |
| GSE26712 | [GSM657615](https://www.ncbi.nlm.nih.gov/geo/query/acc.cgi?acc=GSM657615) | Ovarian Cancer SO283 | GPL96 | late | high | Late-stage high-grade ovarian cancer | Suboptimal | DOD (dead of disease) | survival years: 0.66 | USA |
| GSE26712 | [GSM657616](https://www.ncbi.nlm.nih.gov/geo/query/acc.cgi?acc=GSM657616) | Ovarian Cancer SO285 | GPL96 | late | high | Late-stage high-grade ovarian cancer | Suboptimal | DOD (dead of disease) | survival years: 2.32 | USA |
| GSE26712 | [GSM657617](https://www.ncbi.nlm.nih.gov/geo/query/acc.cgi?acc=GSM657617) | Ovarian Cancer SO290 | GPL96 | late | high | Late-stage high-grade ovarian cancer | Optimal | DOD (dead of disease) | survival years: 3.5 | USA |
| GSE26712 | [GSM657618](https://www.ncbi.nlm.nih.gov/geo/query/acc.cgi?acc=GSM657618) | Ovarian Cancer SO295 | GPL96 | late | high | Late-stage high-grade ovarian cancer | Suboptimal | DOD (dead of disease) | survival years: 3.24 | USA |
| GSE26712 | [GSM657619](https://www.ncbi.nlm.nih.gov/geo/query/acc.cgi?acc=GSM657619) | Ovarian Cancer SO299 | GPL96 | late | high | Late-stage high-grade ovarian cancer | Suboptimal | DOD (dead of disease) | survival years: 0.06 | USA |
| GSE26712 | [GSM657620](https://www.ncbi.nlm.nih.gov/geo/query/acc.cgi?acc=GSM657620) | Ovarian Cancer SO300 | GPL96 | late | high | Late-stage high-grade ovarian cancer | Optimal | NED (no evidence of disease) | survival years: 0.36 | USA |
| GSE26712 | [GSM657621](https://www.ncbi.nlm.nih.gov/geo/query/acc.cgi?acc=GSM657621) | Ovarian Cancer SO301 | GPL96 | late | high | Late-stage high-grade ovarian cancer | Suboptimal | DOD (dead of disease) | survival years: 2.99 | USA |
| GSE26712 | [GSM657622](https://www.ncbi.nlm.nih.gov/geo/query/acc.cgi?acc=GSM657622) | Ovarian Cancer SO303 | GPL96 | late | high | Late-stage high-grade ovarian cancer | Optimal | DOD (dead of disease) | survival years: 1.55 | USA |
| GSE26712 | [GSM657623](https://www.ncbi.nlm.nih.gov/geo/query/acc.cgi?acc=GSM657623) | Ovarian Cancer SO308 | GPL96 | late | high | Late-stage high-grade ovarian cancer | Optimal | DOD (dead of disease) | survival years: 4.83 | USA |
| GSE26712 | [GSM657624](https://www.ncbi.nlm.nih.gov/geo/query/acc.cgi?acc=GSM657624) | Ovarian Cancer SO31 | GPL96 | late | high | Late-stage high-grade ovarian cancer | Suboptimal | DOD (dead of disease) | survival years: 4.12 | USA |
| GSE26712 | [GSM657625](https://www.ncbi.nlm.nih.gov/geo/query/acc.cgi?acc=GSM657625) | Ovarian Cancer SO312 | GPL96 | late | high | Late-stage high-grade ovarian cancer | Suboptimal | DOD (dead of disease) | survival years: 1.56 | USA |
| GSE26712 | [GSM657626](https://www.ncbi.nlm.nih.gov/geo/query/acc.cgi?acc=GSM657626) | Ovarian Cancer SO322 | GPL96 | late | high | Late-stage high-grade ovarian cancer | Optimal | DOD (dead of disease) | survival years: 3.99 | USA |
| GSE26712 | [GSM657627](https://www.ncbi.nlm.nih.gov/geo/query/acc.cgi?acc=GSM657627) | Ovarian Cancer SO325 | GPL96 | late | high | Late-stage high-grade ovarian cancer | Suboptimal | DOD (dead of disease) | survival years: 0.31 | USA |
| GSE26712 | [GSM657628](https://www.ncbi.nlm.nih.gov/geo/query/acc.cgi?acc=GSM657628) | Ovarian Cancer SO334 | GPL96 | late | high | Late-stage high-grade ovarian cancer | Suboptimal | DOD (dead of disease) | survival years: 0.35 | USA |
| GSE26712 | [GSM657629](https://www.ncbi.nlm.nih.gov/geo/query/acc.cgi?acc=GSM657629) | Ovarian Cancer SO342 | GPL96 | late | high | Late-stage high-grade ovarian cancer | Optimal | DOD (dead of disease) | survival years: 2.89 | USA |
| GSE26712 | [GSM657630](https://www.ncbi.nlm.nih.gov/geo/query/acc.cgi?acc=GSM657630) | Ovarian Cancer SO347 | GPL96 | late | high | Late-stage high-grade ovarian cancer | Optimal | DOD (dead of disease) | survival years: 7.85 | USA |
| GSE26712 | [GSM657631](https://www.ncbi.nlm.nih.gov/geo/query/acc.cgi?acc=GSM657631) | Ovarian Cancer SO36 | GPL96 | late | high | Late-stage high-grade ovarian cancer | Suboptimal | AWD (alive with disease) | survival years: 4.39 | USA |
| GSE26712 | [GSM657632](https://www.ncbi.nlm.nih.gov/geo/query/acc.cgi?acc=GSM657632) | Ovarian Cancer SO362 | GPL96 | late | high | Late-stage high-grade ovarian cancer | Optimal | DOD (dead of disease) | survival years: 3.55 | USA |
| GSE26712 | [GSM657633](https://www.ncbi.nlm.nih.gov/geo/query/acc.cgi?acc=GSM657633) | Ovarian Cancer SO367 | GPL96 | late | high | Late-stage high-grade ovarian cancer | Optimal | DOD (dead of disease) | survival years: 6.51 | USA |
| GSE26712 | [GSM657634](https://www.ncbi.nlm.nih.gov/geo/query/acc.cgi?acc=GSM657634) | Ovarian Cancer SO375 | GPL96 | late | high | Late-stage high-grade ovarian cancer | Optimal | NED (no evidence of disease) | survival years: 8.12 | USA |
| GSE26712 | [GSM657635](https://www.ncbi.nlm.nih.gov/geo/query/acc.cgi?acc=GSM657635) | Ovarian Cancer SO38 | GPL96 | late | high | Late-stage high-grade ovarian cancer | Optimal | DOD (dead of disease) | survival years: 2.74 | USA |
| GSE26712 | [GSM657636](https://www.ncbi.nlm.nih.gov/geo/query/acc.cgi?acc=GSM657636) | Ovarian Cancer SO387 | GPL96 | late | high | Late-stage high-grade ovarian cancer | Optimal | DOD (dead of disease) | survival years: 1.47 | USA |
| GSE26712 | [GSM657637](https://www.ncbi.nlm.nih.gov/geo/query/acc.cgi?acc=GSM657637) | Ovarian Cancer SO388 | GPL96 | late | high | Late-stage high-grade ovarian cancer | Suboptimal | DOD (dead of disease) | survival years: 0.97 | USA |
| GSE26712 | [GSM657638](https://www.ncbi.nlm.nih.gov/geo/query/acc.cgi?acc=GSM657638) | Ovarian Cancer SO393 | GPL96 | late | high | Late-stage high-grade ovarian cancer | Suboptimal | DOD (dead of disease) | survival years: 3.95 | USA |
| GSE26712 | [GSM657639](https://www.ncbi.nlm.nih.gov/geo/query/acc.cgi?acc=GSM657639) | Ovarian Cancer SO395 | GPL96 | late | high | Late-stage high-grade ovarian cancer | Optimal | DOD (dead of disease) | survival years: 3.97 | USA |
| GSE26712 | [GSM657640](https://www.ncbi.nlm.nih.gov/geo/query/acc.cgi?acc=GSM657640) | Ovarian Cancer SO396 | GPL96 | late | high | Late-stage high-grade ovarian cancer | Suboptimal | DOD (dead of disease) | survival years: 1.69 | USA |
| GSE26712 | [GSM657641](https://www.ncbi.nlm.nih.gov/geo/query/acc.cgi?acc=GSM657641) | Ovarian Cancer SO4 | GPL96 | late | high | Late-stage high-grade ovarian cancer | Optimal | DOD (dead of disease) | survival years: 0.82 | USA |
| GSE26712 | [GSM657642](https://www.ncbi.nlm.nih.gov/geo/query/acc.cgi?acc=GSM657642) | Ovarian Cancer SO400 | GPL96 | late | high | Late-stage high-grade ovarian cancer | Suboptimal | NED (no evidence of disease) | survival years: 10.09 | USA |
| GSE26712 | [GSM657643](https://www.ncbi.nlm.nih.gov/geo/query/acc.cgi?acc=GSM657643) | Ovarian Cancer SO401 | GPL96 | late | high | Late-stage high-grade ovarian cancer | Optimal | DOD (dead of disease) | survival years: 1.48 | USA |
| GSE26712 | [GSM657644](https://www.ncbi.nlm.nih.gov/geo/query/acc.cgi?acc=GSM657644) | Ovarian Cancer SO402 | GPL96 | late | high | Late-stage high-grade ovarian cancer | Suboptimal | AWD (alive with disease) | survival years: 10.04 | USA |
| GSE26712 | [GSM657645](https://www.ncbi.nlm.nih.gov/geo/query/acc.cgi?acc=GSM657645) | Ovarian Cancer SO404 | GPL96 | late | high | Late-stage high-grade ovarian cancer | Suboptimal | DOD (dead of disease) | survival years: 0.59 | USA |
| GSE26712 | [GSM657646](https://www.ncbi.nlm.nih.gov/geo/query/acc.cgi?acc=GSM657646) | Ovarian Cancer SO409 | GPL96 | late | high | Late-stage high-grade ovarian cancer | Optimal | DOD (dead of disease) | survival years: 3.68 | USA |
| GSE26712 | [GSM657647](https://www.ncbi.nlm.nih.gov/geo/query/acc.cgi?acc=GSM657647) | Ovarian Cancer SO418 | GPL96 | late | high | Late-stage high-grade ovarian cancer | Optimal | DOD (dead of disease) | survival years: 1.34 | USA |
| GSE26712 | [GSM657648](https://www.ncbi.nlm.nih.gov/geo/query/acc.cgi?acc=GSM657648) | Ovarian Cancer SO420 | GPL96 | late | high | Late-stage high-grade ovarian cancer | Suboptimal | DOD (dead of disease) | survival years: 9.02 | USA |
| GSE26712 | [GSM657649](https://www.ncbi.nlm.nih.gov/geo/query/acc.cgi?acc=GSM657649) | Ovarian Cancer SO420b | GPL96 | late | high | Late-stage high-grade ovarian cancer | Suboptimal | DOD (dead of disease) | survival years: 1.1 | USA |
| GSE26712 | [GSM657650](https://www.ncbi.nlm.nih.gov/geo/query/acc.cgi?acc=GSM657650) | Ovarian Cancer SO421 | GPL96 | late | high | Late-stage high-grade ovarian cancer | Suboptimal | DOD (dead of disease) | survival years: 2.57 | USA |
| GSE26712 | [GSM657651](https://www.ncbi.nlm.nih.gov/geo/query/acc.cgi?acc=GSM657651) | Ovarian Cancer SO422 | GPL96 | late | high | Late-stage high-grade ovarian cancer | Suboptimal | DOD (dead of disease) | survival years: 1.97 | USA |
| GSE26712 | [GSM657652](https://www.ncbi.nlm.nih.gov/geo/query/acc.cgi?acc=GSM657652) | Ovarian Cancer SO422b | GPL96 | late | high | Late-stage high-grade ovarian cancer | Suboptimal | NED (no evidence of disease) | survival years: 13.65 | USA |
| GSE26712 | [GSM657653](https://www.ncbi.nlm.nih.gov/geo/query/acc.cgi?acc=GSM657653) | Ovarian Cancer SO423 | GPL96 | late | high | Late-stage high-grade ovarian cancer | Suboptimal | AWD (alive with disease) | survival years: 13.46 | USA |
| GSE26712 | [GSM657654](https://www.ncbi.nlm.nih.gov/geo/query/acc.cgi?acc=GSM657654) | Ovarian Cancer SO426 | GPL96 | late | high | Late-stage high-grade ovarian cancer | Optimal | AWD (alive with disease) | survival years: 13.5 | USA |
| GSE26712 | [GSM657655](https://www.ncbi.nlm.nih.gov/geo/query/acc.cgi?acc=GSM657655) | Ovarian Cancer SO428 | GPL96 | late | high | Late-stage high-grade ovarian cancer | Optimal | DOD (dead of disease) | survival years: 2.62 | USA |
| GSE26712 | [GSM657656](https://www.ncbi.nlm.nih.gov/geo/query/acc.cgi?acc=GSM657656) | Ovarian Cancer SO428b | GPL96 | late | high | Late-stage high-grade ovarian cancer | Optimal | DOD (dead of disease) | survival years: 3.74 | USA |
| GSE26712 | [GSM657657](https://www.ncbi.nlm.nih.gov/geo/query/acc.cgi?acc=GSM657657) | Ovarian Cancer SO429 | GPL96 | late | high | Late-stage high-grade ovarian cancer | Optimal | DOD (dead of disease) | survival years: 2.53 | USA |
| GSE26712 | [GSM657658](https://www.ncbi.nlm.nih.gov/geo/query/acc.cgi?acc=GSM657658) | Ovarian Cancer SO434 | GPL96 | late | high | Late-stage high-grade ovarian cancer | Optimal | DOD (dead of disease) | survival years: 1.98 | USA |
| GSE26712 | [GSM657659](https://www.ncbi.nlm.nih.gov/geo/query/acc.cgi?acc=GSM657659) | Ovarian Cancer SO44 | GPL96 | late | high | Late-stage high-grade ovarian cancer | Suboptimal | NED (no evidence of disease) | survival years: 6.32 | USA |
| GSE26712 | [GSM657660](https://www.ncbi.nlm.nih.gov/geo/query/acc.cgi?acc=GSM657660) | Ovarian Cancer SO46 | GPL96 | late | high | Late-stage high-grade ovarian cancer | Suboptimal | DOD (dead of disease) | survival years: 0.82 | USA |
| GSE26712 | [GSM657661](https://www.ncbi.nlm.nih.gov/geo/query/acc.cgi?acc=GSM657661) | Ovarian Cancer SO475 | GPL96 | late | high | Late-stage high-grade ovarian cancer | Optimal | DOD (dead of disease) | survival years: 3.19 | USA |
| GSE26712 | [GSM657662](https://www.ncbi.nlm.nih.gov/geo/query/acc.cgi?acc=GSM657662) | Ovarian Cancer SO479 | GPL96 | late | high | Late-stage high-grade ovarian cancer | Suboptimal | DOD (dead of disease) | survival years: 5.9 | USA |
| GSE26712 | [GSM657663](https://www.ncbi.nlm.nih.gov/geo/query/acc.cgi?acc=GSM657663) | Ovarian Cancer SO481 | GPL96 | late | high | Late-stage high-grade ovarian cancer | Suboptimal | DOD (dead of disease) | survival years: 4.88 | USA |
| GSE26712 | [GSM657664](https://www.ncbi.nlm.nih.gov/geo/query/acc.cgi?acc=GSM657664) | Ovarian Cancer SO483 | GPL96 | late | high | Late-stage high-grade ovarian cancer | Suboptimal | DOD (dead of disease) | survival years: 0.4 | USA |
| GSE26712 | [GSM657665](https://www.ncbi.nlm.nih.gov/geo/query/acc.cgi?acc=GSM657665) | Ovarian Cancer SO487 | GPL96 | late | high | Late-stage high-grade ovarian cancer | Optimal | DOD (dead of disease) | survival years: 7.22 | USA |
| GSE26712 | [GSM657666](https://www.ncbi.nlm.nih.gov/geo/query/acc.cgi?acc=GSM657666) | Ovarian Cancer SO489 | GPL96 | late | high | Late-stage high-grade ovarian cancer | Suboptimal | DOD (dead of disease) | survival years: 5.41 | USA |
| GSE26712 | [GSM657667](https://www.ncbi.nlm.nih.gov/geo/query/acc.cgi?acc=GSM657667) | Ovarian Cancer SO490 | GPL96 | late | high | Late-stage high-grade ovarian cancer | Optimal | AWD (alive with disease) | survival years: 10.73 | USA |
| GSE26712 | [GSM657668](https://www.ncbi.nlm.nih.gov/geo/query/acc.cgi?acc=GSM657668) | Ovarian Cancer SO5 | GPL96 | late | high | Late-stage high-grade ovarian cancer | Suboptimal | DOD (dead of disease) | survival years: 7.43 | USA |
| GSE26712 | [GSM657669](https://www.ncbi.nlm.nih.gov/geo/query/acc.cgi?acc=GSM657669) | Ovarian Cancer SO500 | GPL96 | late | high | Late-stage high-grade ovarian cancer | Optimal | DOD (dead of disease) | survival years: 2.33 | USA |
| GSE26712 | [GSM657670](https://www.ncbi.nlm.nih.gov/geo/query/acc.cgi?acc=GSM657670) | Ovarian Cancer SO501 | GPL96 | late | high | Late-stage high-grade ovarian cancer | Optimal | DOD (dead of disease) | survival years: 10.87 | USA |
| GSE26712 | [GSM657671](https://www.ncbi.nlm.nih.gov/geo/query/acc.cgi?acc=GSM657671) | Ovarian Cancer SO502 | GPL96 | late | high | Late-stage high-grade ovarian cancer | Suboptimal | DOD (dead of disease) | survival years: 8.46 | USA |
| GSE26712 | [GSM657672](https://www.ncbi.nlm.nih.gov/geo/query/acc.cgi?acc=GSM657672) | Ovarian Cancer SO504 | GPL96 | late | high | Late-stage high-grade ovarian cancer | Suboptimal | NED (no evidence of disease) | survival years: 11.78 | USA |
| GSE26712 | [GSM657673](https://www.ncbi.nlm.nih.gov/geo/query/acc.cgi?acc=GSM657673) | Ovarian Cancer SO505 | GPL96 | late | high | Late-stage high-grade ovarian cancer | Optimal | NED (no evidence of disease) | survival years: 11.59 | USA |
| GSE26712 | [GSM657674](https://www.ncbi.nlm.nih.gov/geo/query/acc.cgi?acc=GSM657674) | Ovarian Cancer SO506 | GPL96 | late | high | Late-stage high-grade ovarian cancer | Suboptimal | DOD (dead of disease) | survival years: 1.37 | USA |
| GSE26712 | [GSM657675](https://www.ncbi.nlm.nih.gov/geo/query/acc.cgi?acc=GSM657675) | Ovarian Cancer SO507 | GPL96 | late | high | Late-stage high-grade ovarian cancer | Optimal | DOD (dead of disease) | survival years: 6.81 | USA |
| GSE26712 | [GSM657676](https://www.ncbi.nlm.nih.gov/geo/query/acc.cgi?acc=GSM657676) | Ovarian Cancer SO509 | GPL96 | late | high | Late-stage high-grade ovarian cancer | Suboptimal | DOD (dead of disease) | survival years: 1.84 | USA |
| GSE26712 | [GSM657677](https://www.ncbi.nlm.nih.gov/geo/query/acc.cgi?acc=GSM657677) | Ovarian Cancer SO511 | GPL96 | late | high | Late-stage high-grade ovarian cancer | Suboptimal | DOD (dead of disease) | survival years: 1.66 | USA |
| GSE26712 | [GSM657678](https://www.ncbi.nlm.nih.gov/geo/query/acc.cgi?acc=GSM657678) | Ovarian Cancer SO57 | GPL96 | late | high | Late-stage high-grade ovarian cancer | Suboptimal | DOD (dead of disease) | survival years: 0.88 | USA |
| GSE26712 | [GSM657679](https://www.ncbi.nlm.nih.gov/geo/query/acc.cgi?acc=GSM657679) | Ovarian Cancer SO58 | GPL96 | late | high | Late-stage high-grade ovarian cancer | Suboptimal | DOD (dead of disease) | survival years: 0.8 | USA |
| GSE26712 | [GSM657680](https://www.ncbi.nlm.nih.gov/geo/query/acc.cgi?acc=GSM657680) | Ovarian Cancer SO59 | GPL96 | late | high | Late-stage high-grade ovarian cancer | Optimal | DOD (dead of disease) | survival years: 2.03 | USA |
| GSE26712 | [GSM657681](https://www.ncbi.nlm.nih.gov/geo/query/acc.cgi?acc=GSM657681) | Ovarian Cancer SO60 | GPL96 | late | high | Late-stage high-grade ovarian cancer | Suboptimal | DOD (dead of disease) | survival years: 2.18 | USA |
| GSE26712 | [GSM657682](https://www.ncbi.nlm.nih.gov/geo/query/acc.cgi?acc=GSM657682) | Ovarian Cancer SO600 | GPL96 | late | high | Late-stage high-grade ovarian cancer | Suboptimal | DOD (dead of disease) | survival years: 8.82 | USA |
| GSE26712 | [GSM657683](https://www.ncbi.nlm.nih.gov/geo/query/acc.cgi?acc=GSM657683) | Ovarian Cancer SO603 | GPL96 | late | high | Late-stage high-grade ovarian cancer | Suboptimal | DOD (dead of disease) | survival years: 2.25 | USA |
| GSE26712 | [GSM657684](https://www.ncbi.nlm.nih.gov/geo/query/acc.cgi?acc=GSM657684) | Ovarian Cancer SO604 | GPL96 | late | high | Late-stage high-grade ovarian cancer | Suboptimal | DOD (dead of disease) | survival years: 0.56 | USA |
| GSE26712 | [GSM657685](https://www.ncbi.nlm.nih.gov/geo/query/acc.cgi?acc=GSM657685) | Ovarian Cancer SO607 | GPL96 | late | high | Late-stage high-grade ovarian cancer | Suboptimal | DOD (dead of disease) | survival years: 6.88 | USA |
| GSE26712 | [GSM657686](https://www.ncbi.nlm.nih.gov/geo/query/acc.cgi?acc=GSM657686) | Ovarian Cancer SO609 | GPL96 | late | high | Late-stage high-grade ovarian cancer | Suboptimal | DOD (dead of disease) | survival years: 5.63 | USA |
| GSE26712 | [GSM657687](https://www.ncbi.nlm.nih.gov/geo/query/acc.cgi?acc=GSM657687) | Ovarian Cancer SO61 | GPL96 | late | high | Late-stage high-grade ovarian cancer | Optimal | NED (no evidence of disease) | survival years: 5.8 | USA |
| GSE26712 | [GSM657688](https://www.ncbi.nlm.nih.gov/geo/query/acc.cgi?acc=GSM657688) | Ovarian Cancer SO610 | GPL96 | late | high | Late-stage high-grade ovarian cancer | Suboptimal | DOD (dead of disease) | survival years: 6.49 | USA |
| GSE26712 | [GSM657689](https://www.ncbi.nlm.nih.gov/geo/query/acc.cgi?acc=GSM657689) | Ovarian Cancer SO613 | GPL96 | late | high | Late-stage high-grade ovarian cancer | Optimal | DOD (dead of disease) | survival years: 6.54 | USA |
| GSE26712 | [GSM657690](https://www.ncbi.nlm.nih.gov/geo/query/acc.cgi?acc=GSM657690) | Ovarian Cancer SO67 | GPL96 | late | high | Late-stage high-grade ovarian cancer | Suboptimal | DOD (dead of disease) | survival years: 0.79 | USA |
| GSE26712 | [GSM657691](https://www.ncbi.nlm.nih.gov/geo/query/acc.cgi?acc=GSM657691) | Ovarian Cancer SO68 | GPL96 | late | high | Late-stage high-grade ovarian cancer | Optimal | NED (no evidence of disease) | survival years: 5.43 | USA |
| GSE26712 | [GSM657692](https://www.ncbi.nlm.nih.gov/geo/query/acc.cgi?acc=GSM657692) | Ovarian Cancer SO69 | GPL96 | late | high | Late-stage high-grade ovarian cancer | Suboptimal | DOD (dead of disease) | survival years: 4.55 | USA |
| GSE26712 | [GSM657693](https://www.ncbi.nlm.nih.gov/geo/query/acc.cgi?acc=GSM657693) | Ovarian Cancer SO7 | GPL96 | late | high | Late-stage high-grade ovarian cancer | Optimal | DOD (dead of disease) | survival years: 5.4 | USA |
| GSE26712 | [GSM657694](https://www.ncbi.nlm.nih.gov/geo/query/acc.cgi?acc=GSM657694) | Ovarian Cancer SO70 | GPL96 | late | high | Late-stage high-grade ovarian cancer | Suboptimal | DOD (dead of disease) | survival years: 2.54 | USA |
| GSE26712 | [GSM657695](https://www.ncbi.nlm.nih.gov/geo/query/acc.cgi?acc=GSM657695) | Ovarian Cancer SO71 | GPL96 | late | high | Late-stage high-grade ovarian cancer | Suboptimal | DOD (dead of disease) | survival years: 4.67 | USA |
| GSE26712 | [GSM657696](https://www.ncbi.nlm.nih.gov/geo/query/acc.cgi?acc=GSM657696) | Ovarian Cancer SO73 | GPL96 | late | high | Late-stage high-grade ovarian cancer | Suboptimal | AWD (alive with disease) | survival years: 5.27 | USA |
| GSE26712 | [GSM657697](https://www.ncbi.nlm.nih.gov/geo/query/acc.cgi?acc=GSM657697) | Ovarian Cancer SO74 | GPL96 | late | high | Late-stage high-grade ovarian cancer | Optimal | DOD (dead of disease) | survival years: 0.52 | USA |
| GSE26712 | [GSM657698](https://www.ncbi.nlm.nih.gov/geo/query/acc.cgi?acc=GSM657698) | Ovarian Cancer SO76 | GPL96 | late | high | Late-stage high-grade ovarian cancer | Suboptimal | NED (no evidence of disease) | survival years: 4.88 | USA |
| GSE26712 | [GSM657699](https://www.ncbi.nlm.nih.gov/geo/query/acc.cgi?acc=GSM657699) | Ovarian Cancer SO77 | GPL96 | late | high | Late-stage high-grade ovarian cancer | Suboptimal | DOD (dead of disease) | survival years: 0.71 | USA |
| GSE26712 | [GSM657700](https://www.ncbi.nlm.nih.gov/geo/query/acc.cgi?acc=GSM657700) | Ovarian Cancer SO78 | GPL96 | late | high | Late-stage high-grade ovarian cancer | Optimal | DOD (dead of disease) | survival years: 3.94 | USA |
| GSE26712 | [GSM657701](https://www.ncbi.nlm.nih.gov/geo/query/acc.cgi?acc=GSM657701) | Ovarian Cancer SO79 | GPL96 | late | high | Late-stage high-grade ovarian cancer | Suboptimal | NED (no evidence of disease) | survival years: 4.89 | USA |
| GSE26712 | [GSM657702](https://www.ncbi.nlm.nih.gov/geo/query/acc.cgi?acc=GSM657702) | Ovarian Cancer SO8 | GPL96 | late | high | Late-stage high-grade ovarian cancer | Optimal | AWD (alive with disease) | survival years: 7.97 | USA |
| GSE26712 | [GSM657703](https://www.ncbi.nlm.nih.gov/geo/query/acc.cgi?acc=GSM657703) | Ovarian Cancer SO80 | GPL96 | late | high | Late-stage high-grade ovarian cancer | Optimal | AWD (alive with disease) | survival years: 4.46 | USA |
| GSE26712 | [GSM657704](https://www.ncbi.nlm.nih.gov/geo/query/acc.cgi?acc=GSM657704) | Ovarian Cancer SO82 | GPL96 | late | high | Late-stage high-grade ovarian cancer | Suboptimal | DOD (dead of disease) | survival years: 1.81 | USA |
| GSE26712 | [GSM657705](https://www.ncbi.nlm.nih.gov/geo/query/acc.cgi?acc=GSM657705) | Ovarian Cancer SO83 | GPL96 | late | high | Late-stage high-grade ovarian cancer | Suboptimal | NED (no evidence of disease) | survival years: 4.9 | USA |
| GSE26712 | [GSM657706](https://www.ncbi.nlm.nih.gov/geo/query/acc.cgi?acc=GSM657706) | Ovarian Cancer SO84 | GPL96 | late | high | Late-stage high-grade ovarian cancer | Suboptimal | DOD (dead of disease) | survival years: 1.12 | USA |
| GSE26712 | [GSM657707](https://www.ncbi.nlm.nih.gov/geo/query/acc.cgi?acc=GSM657707) | Ovarian Cancer SO85 | GPL96 | late | high | Late-stage high-grade ovarian cancer | Suboptimal | DOD (dead of disease) | survival years: 0.74 | USA |
| GSE26712 | [GSM657708](https://www.ncbi.nlm.nih.gov/geo/query/acc.cgi?acc=GSM657708) | Ovarian Cancer SO86 | GPL96 | late | high | Late-stage high-grade ovarian cancer | Suboptimal | AWD (alive with disease) | survival years: 4.96 | USA |
| GSE26712 | [GSM657709](https://www.ncbi.nlm.nih.gov/geo/query/acc.cgi?acc=GSM657709) | Ovarian Cancer SO87 | GPL96 | late | high | Late-stage high-grade ovarian cancer | Optimal | NED (no evidence of disease) | survival years: 4.74 | USA |
| GSE26712 | [GSM657710](https://www.ncbi.nlm.nih.gov/geo/query/acc.cgi?acc=GSM657710) | Ovarian Cancer SO88 | GPL96 | late | high | Late-stage high-grade ovarian cancer | Suboptimal | NED (no evidence of disease) | survival years: 4.76 | USA |
| GSE26712 | [GSM657711](https://www.ncbi.nlm.nih.gov/geo/query/acc.cgi?acc=GSM657711) | Ovarian Cancer SO89 | GPL96 | late | high | Late-stage high-grade ovarian cancer | Suboptimal | AWD (alive with disease) | survival years: 4.66 | USA |
| GSE26712 | [GSM657712](https://www.ncbi.nlm.nih.gov/geo/query/acc.cgi?acc=GSM657712) | Ovarian Cancer SO91 | GPL96 | late | high | Late-stage high-grade ovarian cancer | Optimal | NED (no evidence of disease) | survival years: 4.63 | USA |
| GSE26712 | [GSM657713](https://www.ncbi.nlm.nih.gov/geo/query/acc.cgi?acc=GSM657713) | Ovarian Cancer SO94 | GPL96 | late | high | Late-stage high-grade ovarian cancer | Suboptimal | DOD (dead of disease) | survival years: 3.73 | USA |
| GSE26712 | [GSM657519](https://www.ncbi.nlm.nih.gov/geo/query/acc.cgi?acc=GSM657519) | Normal HOSE2237 | GPL96 | N/A | N/A | Normal ovarian surface epithelium | N/A | unknown | unknown | USA |
| GSE26712 | [GSM657520](https://www.ncbi.nlm.nih.gov/geo/query/acc.cgi?acc=GSM657520) | Normal HOSE2008 | GPL96 | N/A | N/A | Normal ovarian surface epithelium | N/A | unknown | unknown | USA |
| GSE26712 | [GSM657521](https://www.ncbi.nlm.nih.gov/geo/query/acc.cgi?acc=GSM657521) | Normal HOSE2061 | GPL96 | N/A | N/A | Normal ovarian surface epithelium | N/A | unknown | unknown | USA |
| GSE26712 | [GSM657522](https://www.ncbi.nlm.nih.gov/geo/query/acc.cgi?acc=GSM657522) | Normal HOSE2064 | GPL96 | N/A | N/A | Normal ovarian surface epithelium | N/A | unknown | unknown | USA |
| GSE26712 | [GSM657523](https://www.ncbi.nlm.nih.gov/geo/query/acc.cgi?acc=GSM657523) | Normal HOSE2085 | GPL96 | N/A | N/A | Normal ovarian surface epithelium | N/A | unknown | unknown | USA |
| GSE26712 | [GSM657524](https://www.ncbi.nlm.nih.gov/geo/query/acc.cgi?acc=GSM657524) | Normal HOSE2225 | GPL96 | N/A | N/A | Normal ovarian surface epithelium | N/A | unknown | unknown | USA |
| GSE26712 | [GSM657525](https://www.ncbi.nlm.nih.gov/geo/query/acc.cgi?acc=GSM657525) | Normal HOSE2226 | GPL96 | N/A | N/A | Normal ovarian surface epithelium | N/A | unknown | unknown | USA |
| GSE26712 | [GSM657526](https://www.ncbi.nlm.nih.gov/geo/query/acc.cgi?acc=GSM657526) | Normal HOSE2228 | GPL96 | N/A | N/A | Normal ovarian surface epithelium | N/A | unknown | unknown | USA |
| GSE26712 | [GSM657527](https://www.ncbi.nlm.nih.gov/geo/query/acc.cgi?acc=GSM657527) | Normal HOSE2230 | GPL96 | N/A | N/A | Normal ovarian surface epithelium | N/A | unknown | unknown | USA |
| GSE26712 | [GSM657528](https://www.ncbi.nlm.nih.gov/geo/query/acc.cgi?acc=GSM657528) | Normal HOSE2234 | GPL96 | N/A | N/A | Normal ovarian surface epithelium | N/A | unknown | unknown | USA |
| GSE27651 | [GSM371112](https://www.ncbi.nlm.nih.gov/geo/query/acc.cgi?acc=GSM371112) | HGOSC957 | GPL570 | unknown | high | high-grade ovarian serous carcinoma | unknown | unknown | unknown | USA |
| GSE27651 | [GSM371113](https://www.ncbi.nlm.nih.gov/geo/query/acc.cgi?acc=GSM371113) | HGOSC1109 | GPL570 | unknown | high | high-grade ovarian serous carcinoma | unknown | unknown | unknown | USA |
| GSE27651 | [GSM371141](https://www.ncbi.nlm.nih.gov/geo/query/acc.cgi?acc=GSM371141) | HGOSC1214 | GPL570 | unknown | high | high-grade ovarian serous carcinoma | unknown | unknown | unknown | USA |
| GSE27651 | [GSM371142](https://www.ncbi.nlm.nih.gov/geo/query/acc.cgi?acc=GSM371142) | HGOSC1933 | GPL570 | unknown | high | high-grade ovarian serous carcinoma | unknown | unknown | unknown | USA |
| GSE27651 | [GSM371143](https://www.ncbi.nlm.nih.gov/geo/query/acc.cgi?acc=GSM371143) | HGOSC317A | GPL570 | unknown | high | high-grade ovarian serous carcinoma | unknown | unknown | unknown | USA |
| GSE27651 | [GSM371144](https://www.ncbi.nlm.nih.gov/geo/query/acc.cgi?acc=GSM371144) | HGOSC324C | GPL570 | unknown | high | high-grade ovarian serous carcinoma | unknown | unknown | unknown | USA |
| GSE27651 | [GSM371145](https://www.ncbi.nlm.nih.gov/geo/query/acc.cgi?acc=GSM371145) | HGOSC358 | GPL570 | unknown | high | high-grade ovarian serous carcinoma | unknown | unknown | unknown | USA |
| GSE27651 | [GSM371146](https://www.ncbi.nlm.nih.gov/geo/query/acc.cgi?acc=GSM371146) | HGOSC377 | GPL570 | unknown | high | high-grade ovarian serous carcinoma | unknown | unknown | unknown | USA |
| GSE27651 | [GSM371642](https://www.ncbi.nlm.nih.gov/geo/query/acc.cgi?acc=GSM371642) | HGOSC380 | GPL570 | unknown | high | high-grade ovarian serous carcinoma | unknown | unknown | unknown | USA |
| GSE27651 | [GSM371643](https://www.ncbi.nlm.nih.gov/geo/query/acc.cgi?acc=GSM371643) | HGOSC389C | GPL570 | unknown | high | high-grade ovarian serous carcinoma | unknown | unknown | unknown | USA |
| GSE27651 | [GSM371645](https://www.ncbi.nlm.nih.gov/geo/query/acc.cgi?acc=GSM371645) | HGOSC461 | GPL570 | unknown | high | high-grade ovarian serous carcinoma | unknown | unknown | unknown | USA |
| GSE27651 | [GSM371647](https://www.ncbi.nlm.nih.gov/geo/query/acc.cgi?acc=GSM371647) | HGOSC486 | GPL570 | unknown | high | high-grade ovarian serous carcinoma | unknown | unknown | unknown | USA |
| GSE27651 | [GSM371648](https://www.ncbi.nlm.nih.gov/geo/query/acc.cgi?acc=GSM371648) | HGOSC631 | GPL570 | unknown | high | high-grade ovarian serous carcinoma | unknown | unknown | unknown | USA |
| GSE27651 | [GSM371649](https://www.ncbi.nlm.nih.gov/geo/query/acc.cgi?acc=GSM371649) | HGOSC692 | GPL570 | unknown | high | high-grade ovarian serous carcinoma | unknown | unknown | unknown | USA |
| GSE27651 | [GSM371651](https://www.ncbi.nlm.nih.gov/geo/query/acc.cgi?acc=GSM371651) | HGOSC702 | GPL570 | unknown | high | high-grade ovarian serous carcinoma | unknown | unknown | unknown | USA |
| GSE27651 | [GSM371653](https://www.ncbi.nlm.nih.gov/geo/query/acc.cgi?acc=GSM371653) | HGOSC718 | GPL570 | unknown | high | high-grade ovarian serous carcinoma | unknown | unknown | unknown | USA |
| GSE27651 | [GSM371654](https://www.ncbi.nlm.nih.gov/geo/query/acc.cgi?acc=GSM371654) | HGOSC765 | GPL570 | unknown | high | high-grade ovarian serous carcinoma | unknown | unknown | unknown | USA |
| GSE27651 | [GSM371655](https://www.ncbi.nlm.nih.gov/geo/query/acc.cgi?acc=GSM371655) | HGOSC778 | GPL570 | unknown | high | high-grade ovarian serous carcinoma | unknown | unknown | unknown | USA |
| GSE27651 | [GSM371656](https://www.ncbi.nlm.nih.gov/geo/query/acc.cgi?acc=GSM371656) | HGOSC872 | GPL570 | unknown | high | high-grade ovarian serous carcinoma | unknown | unknown | unknown | USA |
| GSE27651 | [GSM372253](https://www.ncbi.nlm.nih.gov/geo/query/acc.cgi?acc=GSM372253) | HGOSC423 | GPL570 | unknown | high | high-grade ovarian serous carcinoma | unknown | unknown | unknown | USA |
| GSE27651 | [GSM372255](https://www.ncbi.nlm.nih.gov/geo/query/acc.cgi?acc=GSM372255) | HGOSC645 | GPL570 | unknown | high | high-grade ovarian serous carcinoma | unknown | unknown | unknown | USA |
| GSE27651 | [GSM372264](https://www.ncbi.nlm.nih.gov/geo/query/acc.cgi?acc=GSM372264) | HGOSC431 | GPL570 | unknown | high | high-grade ovarian serous carcinoma | unknown | unknown | unknown | USA |
| GSE27651 | [GSM372258](https://www.ncbi.nlm.nih.gov/geo/query/acc.cgi?acc=GSM372258) | HOSE2008 | GPL570 | N/A | N/A | normal human ovarian surface epithelials cells | N/A | unknown | unknown | USA |
| GSE27651 | [GSM372259](https://www.ncbi.nlm.nih.gov/geo/query/acc.cgi?acc=GSM372259) | HOSE2061 | GPL570 | N/A | N/A | normal human ovarian surface epithelials cells | N/A | unknown | unknown | USA |
| GSE27651 | [GSM372260](https://www.ncbi.nlm.nih.gov/geo/query/acc.cgi?acc=GSM372260) | HOSE2064 | GPL570 | N/A | N/A | normal human ovarian surface epithelials cells | N/A | unknown | unknown | USA |
| GSE27651 | [GSM372261](https://www.ncbi.nlm.nih.gov/geo/query/acc.cgi?acc=GSM372261) | HOSE2085 | GPL570 | N/A | N/A | normal human ovarian surface epithelials cells | N/A | unknown | unknown | USA |
| GSE27651 | [GSM372262](https://www.ncbi.nlm.nih.gov/geo/query/acc.cgi?acc=GSM372262) | HOSE2230 | GPL570 | N/A | N/A | normal human ovarian surface epithelials cells | N/A | unknown | unknown | USA |
| GSE27651 | [GSM372263](https://www.ncbi.nlm.nih.gov/geo/query/acc.cgi?acc=GSM372263) | HOSE2237 | GPL570 | N/A | N/A | normal human ovarian surface epithelials cells | N/A | unknown | unknown | USA |
| GSE40595 | [GSM997636](https://www.ncbi.nlm.nih.gov/geo/query/acc.cgi?acc=GSM997636) | Tumor epthelial component - sample 317 | GPL570 | unknown | high | Microdissected ovarian tumor epthelial component | unknown | unknown | unknown | USA |
| GSE40595 | [GSM997637](https://www.ncbi.nlm.nih.gov/geo/query/acc.cgi?acc=GSM997637) | Tumor epthelial component - sample 321 | GPL570 | unknown | high | Microdissected ovarian tumor epthelial component | unknown | unknown | unknown | USA |
| GSE40595 | [GSM997638](https://www.ncbi.nlm.nih.gov/geo/query/acc.cgi?acc=GSM997638) | Tumor epthelial component - sample 324 | GPL570 | unknown | high | Microdissected ovarian tumor epthelial component | unknown | unknown | unknown | USA |
| GSE40595 | [GSM997639](https://www.ncbi.nlm.nih.gov/geo/query/acc.cgi?acc=GSM997639) | Tumor epthelial component - sample 326 | GPL570 | unknown | high | Microdissected ovarian tumor epthelial component | unknown | unknown | unknown | USA |
| GSE40595 | [GSM997640](https://www.ncbi.nlm.nih.gov/geo/query/acc.cgi?acc=GSM997640) | Tumor epthelial component - sample 332 | GPL570 | unknown | high | Microdissected ovarian tumor epthelial component | unknown | unknown | unknown | USA |
| GSE40595 | [GSM997641](https://www.ncbi.nlm.nih.gov/geo/query/acc.cgi?acc=GSM997641) | Tumor epthelial component - sample 349 | GPL570 | unknown | high | Microdissected ovarian tumor epthelial component | unknown | unknown | unknown | USA |
| GSE40595 | [GSM997642](https://www.ncbi.nlm.nih.gov/geo/query/acc.cgi?acc=GSM997642) | Tumor epthelial component - sample 351 | GPL570 | unknown | high | Microdissected ovarian tumor epthelial component | unknown | unknown | unknown | USA |
| GSE40595 | [GSM997643](https://www.ncbi.nlm.nih.gov/geo/query/acc.cgi?acc=GSM997643) | Tumor epthelial component - sample 377 | GPL570 | unknown | high | Microdissected ovarian tumor epthelial component | unknown | unknown | unknown | USA |
| GSE40595 | [GSM997644](https://www.ncbi.nlm.nih.gov/geo/query/acc.cgi?acc=GSM997644) | Tumor epthelial component - sample 380 | GPL570 | unknown | high | Microdissected ovarian tumor epthelial component | unknown | unknown | unknown | USA |
| GSE40595 | [GSM997645](https://www.ncbi.nlm.nih.gov/geo/query/acc.cgi?acc=GSM997645) | Tumor epthelial component - sample 386 | GPL570 | unknown | high | Microdissected ovarian tumor epthelial component | unknown | unknown | unknown | USA |
| GSE40595 | [GSM997646](https://www.ncbi.nlm.nih.gov/geo/query/acc.cgi?acc=GSM997646) | Tumor epthelial component - sample 388 | GPL570 | unknown | high | Microdissected ovarian tumor epthelial component | unknown | unknown | unknown | USA |
| GSE40595 | [GSM997647](https://www.ncbi.nlm.nih.gov/geo/query/acc.cgi?acc=GSM997647) | Tumor epthelial component - sample 389 | GPL570 | unknown | high | Microdissected ovarian tumor epthelial component | unknown | unknown | unknown | USA |
| GSE40595 | [GSM997648](https://www.ncbi.nlm.nih.gov/geo/query/acc.cgi?acc=GSM997648) | Tumor epthelial component - sample 393 | GPL570 | unknown | high | Microdissected ovarian tumor epthelial component | unknown | unknown | unknown | USA |
| GSE40595 | [GSM997649](https://www.ncbi.nlm.nih.gov/geo/query/acc.cgi?acc=GSM997649) | Tumor epthelial component - sample 394 | GPL570 | unknown | high | Microdissected ovarian tumor epthelial component | unknown | unknown | unknown | USA |
| GSE40595 | [GSM997650](https://www.ncbi.nlm.nih.gov/geo/query/acc.cgi?acc=GSM997650) | Tumor epthelial component - sample 396 | GPL570 | unknown | high | Microdissected ovarian tumor epthelial component | unknown | unknown | unknown | USA |
| GSE40595 | [GSM997651](https://www.ncbi.nlm.nih.gov/geo/query/acc.cgi?acc=GSM997651) | Tumor epthelial component - sample 402 | GPL570 | unknown | high | Microdissected ovarian tumor epthelial component | unknown | unknown | unknown | USA |
| GSE40595 | [GSM997652](https://www.ncbi.nlm.nih.gov/geo/query/acc.cgi?acc=GSM997652) | Tumor epthelial component - sample 412 | GPL570 | unknown | high | Microdissected ovarian tumor epthelial component | unknown | unknown | unknown | USA |
| GSE40595 | [GSM997653](https://www.ncbi.nlm.nih.gov/geo/query/acc.cgi?acc=GSM997653) | Tumor epthelial component - sample 427 | GPL570 | unknown | high | Microdissected ovarian tumor epthelial component | unknown | unknown | unknown | USA |
| GSE40595 | [GSM997654](https://www.ncbi.nlm.nih.gov/geo/query/acc.cgi?acc=GSM997654) | Tumor epthelial component - sample 434 | GPL570 | unknown | high | Microdissected ovarian tumor epthelial component | unknown | unknown | unknown | USA |
| GSE40595 | [GSM997655](https://www.ncbi.nlm.nih.gov/geo/query/acc.cgi?acc=GSM997655) | Tumor epthelial component - sample 443 | GPL570 | unknown | high | Microdissected ovarian tumor epthelial component | unknown | unknown | unknown | USA |
| GSE40595 | [GSM997656](https://www.ncbi.nlm.nih.gov/geo/query/acc.cgi?acc=GSM997656) | Tumor epthelial component - sample 467 | GPL570 | unknown | high | Microdissected ovarian tumor epthelial component | unknown | unknown | unknown | USA |
| GSE40595 | [GSM997657](https://www.ncbi.nlm.nih.gov/geo/query/acc.cgi?acc=GSM997657) | Tumor epthelial component - sample 629 | GPL570 | unknown | high | Microdissected ovarian tumor epthelial component | unknown | unknown | unknown | USA |
| GSE40595 | [GSM997658](https://www.ncbi.nlm.nih.gov/geo/query/acc.cgi?acc=GSM997658) | Tumor epthelial component - sample 714 | GPL570 | unknown | high | Microdissected ovarian tumor epthelial component | unknown | unknown | unknown | USA |
| GSE40595 | [GSM997659](https://www.ncbi.nlm.nih.gov/geo/query/acc.cgi?acc=GSM997659) | Tumor epthelial component - sample 744 | GPL570 | unknown | high | Microdissected ovarian tumor epthelial component | unknown | unknown | unknown | USA |
| GSE40595 | [GSM997660](https://www.ncbi.nlm.nih.gov/geo/query/acc.cgi?acc=GSM997660) | Tumor epthelial component - sample 765 | GPL570 | unknown | high | Microdissected ovarian tumor epthelial component | unknown | unknown | unknown | USA |
| GSE40595 | [GSM997661](https://www.ncbi.nlm.nih.gov/geo/query/acc.cgi?acc=GSM997661) | Tumor epthelial component - sample 778 | GPL570 | unknown | high | Microdissected ovarian tumor epthelial component | unknown | unknown | unknown | USA |
| GSE40595 | [GSM997662](https://www.ncbi.nlm.nih.gov/geo/query/acc.cgi?acc=GSM997662) | Tumor epthelial component - sample 780 | GPL570 | unknown | high | Microdissected ovarian tumor epthelial component | unknown | unknown | unknown | USA |
| GSE40595 | [GSM997663](https://www.ncbi.nlm.nih.gov/geo/query/acc.cgi?acc=GSM997663) | Tumor epthelial component - sample 799 | GPL570 | unknown | high | Microdissected ovarian tumor epthelial component | unknown | unknown | unknown | USA |
| GSE40595 | [GSM997664](https://www.ncbi.nlm.nih.gov/geo/query/acc.cgi?acc=GSM997664) | Tumor epthelial component - sample 872 | GPL570 | unknown | high | Microdissected ovarian tumor epthelial component | unknown | unknown | unknown | USA |
| GSE40595 | [GSM997665](https://www.ncbi.nlm.nih.gov/geo/query/acc.cgi?acc=GSM997665) | Tumor epthelial component - sample 1064 | GPL570 | unknown | high | Microdissected ovarian tumor epthelial component | unknown | unknown | unknown | USA |
| GSE40595 | [GSM997666](https://www.ncbi.nlm.nih.gov/geo/query/acc.cgi?acc=GSM997666) | Tumor epthelial component - sample 1231 | GPL570 | unknown | high | Microdissected ovarian tumor epthelial component | unknown | unknown | unknown | USA |
| GSE40595 | [GSM997667](https://www.ncbi.nlm.nih.gov/geo/query/acc.cgi?acc=GSM997667) | Tumor epthelial component - sample 1660 | GPL570 | unknown | high | Microdissected ovarian tumor epthelial component | unknown | unknown | unknown | USA |
| GSE40595 | [GSM997630](https://www.ncbi.nlm.nih.gov/geo/query/acc.cgi?acc=GSM997630) | Human ovarian surface epthelium - sample 2225 | GPL570 | N/A | N/A | Microdissected ovarian surface epthelium | N/A | unknown | unknown | USA |
| GSE40595 | [GSM997631](https://www.ncbi.nlm.nih.gov/geo/query/acc.cgi?acc=GSM997631) | Human ovarian surface epthelium - sample 2226 | GPL570 | N/A | N/A | Microdissected ovarian surface epthelium | N/A | unknown | unknown | USA |
| GSE40595 | [GSM997632](https://www.ncbi.nlm.nih.gov/geo/query/acc.cgi?acc=GSM997632) | Human ovarian surface epthelium - sample 2228 | GPL570 | N/A | N/A | Microdissected ovarian surface epthelium | N/A | unknown | unknown | USA |
| GSE40595 | [GSM997633](https://www.ncbi.nlm.nih.gov/geo/query/acc.cgi?acc=GSM997633) | Human ovarian surface epthelium - sample 2230 | GPL570 | N/A | N/A | Microdissected ovarian surface epthelium | N/A | unknown | unknown | USA |
| GSE40595 | [GSM997634](https://www.ncbi.nlm.nih.gov/geo/query/acc.cgi?acc=GSM997634) | Human ovarian surface epthelium - sample 2234 | GPL570 | N/A | N/A | Microdissected ovarian surface epthelium | N/A | unknown | unknown | USA |
| GSE40595 | [GSM997635](https://www.ncbi.nlm.nih.gov/geo/query/acc.cgi?acc=GSM997635) | Human ovarian surface epthelium - sample 2237 | GPL570 | N/A | N/A | Microdissected ovarian surface epthelium | N/A | unknown | unknown | USA |
| GSE54388 | [GSM1314228](https://www.ncbi.nlm.nih.gov/geo/query/acc.cgi?acc=GSM1314228) | Tumor epithelial component - sample 317 | GPL570 | unknown | high | serous ovarian cancer | unknown | unknown | unknown | USA |
| GSE54388 | [GSM1314229](https://www.ncbi.nlm.nih.gov/geo/query/acc.cgi?acc=GSM1314229) | Tumor epithelial component - sample 324 | GPL570 | unknown | high | serous ovarian cancer | unknown | unknown | unknown | USA |
| GSE54388 | [GSM1314230](https://www.ncbi.nlm.nih.gov/geo/query/acc.cgi?acc=GSM1314230) | Tumor epithelial component - sample 377 | GPL570 | unknown | high | serous ovarian cancer | unknown | unknown | unknown | USA |
| GSE54388 | [GSM1314231](https://www.ncbi.nlm.nih.gov/geo/query/acc.cgi?acc=GSM1314231) | Tumor epithelial component - sample 380 | GPL570 | unknown | high | serous ovarian cancer | unknown | unknown | unknown | USA |
| GSE54388 | [GSM1314232](https://www.ncbi.nlm.nih.gov/geo/query/acc.cgi?acc=GSM1314232) | Tumor epithelial component - sample 388 | GPL570 | unknown | high | serous ovarian cancer | unknown | unknown | unknown | USA |
| GSE54388 | [GSM1314233](https://www.ncbi.nlm.nih.gov/geo/query/acc.cgi?acc=GSM1314233) | Tumor epithelial component - sample 389 | GPL570 | unknown | high | serous ovarian cancer | unknown | unknown | unknown | USA |
| GSE54388 | [GSM1314234](https://www.ncbi.nlm.nih.gov/geo/query/acc.cgi?acc=GSM1314234) | Tumor epithelial component - sample 412 | GPL570 | unknown | high | serous ovarian cancer | unknown | unknown | unknown | USA |
| GSE54388 | [GSM1314235](https://www.ncbi.nlm.nih.gov/geo/query/acc.cgi?acc=GSM1314235) | Tumor epithelial component - sample 431 | GPL570 | unknown | high | serous ovarian cancer | unknown | unknown | unknown | USA |
| GSE54388 | [GSM1314236](https://www.ncbi.nlm.nih.gov/geo/query/acc.cgi?acc=GSM1314236) | Tumor epithelial component - sample 486 | GPL570 | unknown | high | serous ovarian cancer | unknown | unknown | unknown | USA |
| GSE54388 | [GSM1314237](https://www.ncbi.nlm.nih.gov/geo/query/acc.cgi?acc=GSM1314237) | Tumor epithelial component - sample 645 | GPL570 | unknown | high | serous ovarian cancer | unknown | unknown | unknown | USA |
| GSE54388 | [GSM1314238](https://www.ncbi.nlm.nih.gov/geo/query/acc.cgi?acc=GSM1314238) | Tumor epithelial component - sample 660 | GPL570 | unknown | high | serous ovarian cancer | unknown | unknown | unknown | USA |
| GSE54388 | [GSM1314239](https://www.ncbi.nlm.nih.gov/geo/query/acc.cgi?acc=GSM1314239) | Tumor epithelial component - sample 692 | GPL570 | unknown | high | serous ovarian cancer | unknown | unknown | unknown | USA |
| GSE54388 | [GSM1314240](https://www.ncbi.nlm.nih.gov/geo/query/acc.cgi?acc=GSM1314240) | Tumor epithelial component - sample 702 | GPL570 | unknown | high | serous ovarian cancer | unknown | unknown | unknown | USA |
| GSE54388 | [GSM1314241](https://www.ncbi.nlm.nih.gov/geo/query/acc.cgi?acc=GSM1314241) | Tumor epithelial component - sample 765 | GPL570 | unknown | high | serous ovarian cancer | unknown | unknown | unknown | USA |
| GSE54388 | [GSM1314242](https://www.ncbi.nlm.nih.gov/geo/query/acc.cgi?acc=GSM1314242) | Tumor epithelial component - sample 778 | GPL570 | unknown | high | serous ovarian cancer | unknown | unknown | unknown | USA |
| GSE54388 | [GSM1314243](https://www.ncbi.nlm.nih.gov/geo/query/acc.cgi?acc=GSM1314243) | Tumor epithelial component - sample 872 | GPL570 | unknown | high | serous ovarian cancer | unknown | unknown | unknown | USA |
| GSE54388 | [GSM1314222](https://www.ncbi.nlm.nih.gov/geo/query/acc.cgi?acc=GSM1314222) | Human ovarian surface epithelium - sample 2008 | GPL570 | N/A | N/A | healthy (normal) | N/A | unknown | unknown | USA |
| GSE54388 | [GSM1314223](https://www.ncbi.nlm.nih.gov/geo/query/acc.cgi?acc=GSM1314223) | Human ovarian surface epithelium - sample 2061 | GPL570 | N/A | N/A | healthy (normal) | N/A | unknown | unknown | USA |
| GSE54388 | [GSM1314224](https://www.ncbi.nlm.nih.gov/geo/query/acc.cgi?acc=GSM1314224) | Human ovarian surface epithelium - sample 2064 | GPL570 | N/A | N/A | healthy (normal) | N/A | unknown | unknown | USA |
| GSE54388 | [GSM1314225](https://www.ncbi.nlm.nih.gov/geo/query/acc.cgi?acc=GSM1314225) | Human ovarian surface epithelium - sample 2085 | GPL570 | N/A | N/A | healthy (normal) | N/A | unknown | unknown | USA |
| GSE54388 | [GSM1314226](https://www.ncbi.nlm.nih.gov/geo/query/acc.cgi?acc=GSM1314226) | Human ovarian surface epithelium - sample 2230 | GPL570 | N/A | N/A | healthy (normal) | N/A | unknown | unknown | USA |
| GSE54388 | [GSM1314227](https://www.ncbi.nlm.nih.gov/geo/query/acc.cgi?acc=GSM1314227) | Human ovarian surface epithelium - sample 2237 | GPL570 | N/A | N/A | healthy (normal) | N/A | unknown | unknown | USA |

**Supplementary Table 3** Information for the DEGs identified by integrated analysis of the six GEO datasets (|log2FC| ≥ 2, adjusted *P* < 0.05 and *P* < 0.05)

| **Category** | **Name** | **Score** | **GSE14001** | **GSE18520** | **GSE26712** | **GSE27651** | **GSE40595** | **GSE54388** |
| --- | --- | --- | --- | --- | --- | --- | --- | --- |
| Upregulated gene | CD24 | 1.06E-05 | 4.22964542153846 | 3.10734740851569 | 3.31590321539848 | 3.30490016801948 | 5.51258291014663 | 4.35336919945038 |
| Upregulated gene | CLDN3 | 2.36E-05 | 3.52284062120513 | 3.33129993467448 | 3.2365033597921 | 3.43729068514069 | 3.9338730228395 | 3.10510139783343 |
| Upregulated gene | C1orf106 | 6.67E-05 | 2.1781950065641 | 2.43467845903695 | 2.01014437022869 | 3.64213154758117 | 3.65970560329811 | 2.5099085489642 |
| Upregulated gene | CRABP2 | 0.000143701 | 2.76467431820513 | 2.34077677082001 | 3.28663364292446 | 4.18878787553571 | 3.28864801705869 | 3.1233499985143 |
| Upregulated gene | SOX17 | 0.000147473 | 2.20609868080769 | 4.01260457014289 | 2.98581327251559 | 3.94812984829004 | 4.64657128603602 | 3.41628531602585 |
| Upregulated gene | ELF3 | 0.00033276 | 3.02194571451282 | 2.37310123943366 | 2.12717663678448 | -0.401316944399355 | 3.1647988888455 | 2.14953519360445 |
| Upregulated gene | EPCAM | 0.000944052 | 5.50201023861539 | 2.34118779230174 | 1.83876990960499 | 3.27850208313852 | 2.91665439332196 | 2.99536599752917 |
| Upregulated gene | SCGB2A1 | 0.001228784 | 4.82249520269231 | 4.43261573407706 | 3.50262985847539 | 4.65677135162338 | 4.98245808667185 | 3.92977813221544 |
| Upregulated gene | KLK6 | 0.001510184 | 2.57913555711538 | 2.5737393753659 | 2.520162518614 | 3.34151462973485 | 3.92169269776236 | 3.43731629174877 |
| Upregulated gene | MMP7 | 0.001703418 | 3.20174538905128 | 3.57453032703031 | 2.07002221499654 | 4.31555990919101 | 4.32120654637045 | 3.81722716596656 |
| Upregulated gene | CLDN4 | 0.002303294 | 2.80714109153846 | 1.02872805077721 | 2.02773677286209 | 0.660978967240255 | 2.16581246283931 | 1.08650112227727 |
| Upregulated gene | CKS2 | 0.00247872 | -0.175025986769231 | 2.06837313095517 | 2.26242836809425 | 3.28810805608766 | 2.53579363145006 | 2.47335837289006 |
| Upregulated gene | CP | 0.002502734 | 2.98671714980769 | 2.37058334174495 | 2.24250689310464 | 3.5841443851948 | 5.30517896120532 | 3.37822129706667 |
| Upregulated gene | PSAT1 | 0.005082792 | -0.155222594474361 | 2.31565055464735 | 1.20268797520443 | 3.21729221074404 | 3.55086389694369 | 2.761538808641 |
| Upregulated gene | MECOM | 0.005461428 | 2.32490035292307 | 3.20144138886295 | 1.03394401009009 | 3.32148049193452 | 2.94202240950417 | 2.03379002480568 |
| Upregulated gene | ESRP1 | 0.006536883 | 3.4716579755641 | 1.78206362530599 | 1.41196908830214 | 2.52351360748917 | 2.07039082067985 | 2.07867118080549 |
| Upregulated gene | WFDC2 | 0.008178859 | 3.9626586801282 | 2.51061505109622 | 3.55992990619543 | 2.96868269495129 | 1.93118872246776 | 1.27238008182813 |
| Upregulated gene | CEP55 | 0.012314315 | 0.114101252666665 | 2.74502694770386 | 1.29405008860707 | 3.91181152511363 | 3.62197728549989 | 3.41757937927974 |
| Upregulated gene | MUC1 | 0.015521724 | 3.43888207261538 | 1.47548040971639 | 2.1628798873458 | 0.604142664696964 | 3.03890446803553 | 2.08340628182074 |
| Upregulated gene | MCM2 | 0.020171794 | 0.331850753615379 | 1.85675881166622 | 1.44605490877338 | 3.46518672615801 | 1.95553272006579 | 2.42338712955312 |
| Upregulated gene | FAM83D | 0.024790204 | 0.0939376618205117 | 2.52455120010028 | NA | 3.84530007117695 | 3.71622295666993 | 2.44006278758911 |
| Upregulated gene | ZWINT | 0.024790204 | 0.232880252243588 | 1.72616295670563 | 1.26348264945253 | 3.40700767945346 | 1.57125714649893 | 2.51751609369015 |
| Upregulated gene | NEK2 | 0.03537363 | -0.0726039433333359 | 2.52215647754256 | 1.11160701058905 | 3.11735677255682 | 2.31069836195313 | 1.70589468633674 |
| Upregulated gene | BUB1B | 0.03537363 | 0.0214804306666636 | 2.33616081646287 | 1.27563289984754 | 3.6010065863501 | 2.55814063230618 | 2.80761444328352 |
| Upregulated gene | DLGAP5 | 0.041325707 | -0.942174849628207 | 2.81815184418826 | 1.31732506225918 | 3.72056293205627 | 3.77915494048163 | 2.90167019320152 |
| Upregulated gene | MELK | 0.041325707 | -0.458084439641028 | 2.26718294804209 | 0.940384398766453 | 3.74073372252435 | 2.46375091764764 | 2.66691100842566 |
| Upregulated gene | FZD10 | 0.046268835 | 2.23942936784615 | 3.4288733907855 | 1.14356812309078 | 3.88719179716721 | 3.00763648916746 | 2.72996927862974 |
| Upregulated gene | LPAR3 | 0.047608907 | 2.40797154451282 | 2.5093363268245 | 0.728848316548859 | 2.95973621196969 | 2.92006341404422 | 2.19550284182888 |
| Downregulated gene | ITLN1 | 2.87E-08 | 0.297430662217947 | -5.69669280958607 | NA | -6.06366744212663 | -6.52625568514367 | -6.53718768201316 |
| Downregulated gene | LINC01105 | 2.20E-07 | -1.58212414119231 | -3.64460830540991 | NA | -3.51804345237825 | -3.10386455886121 | -3.54215826845388 |
| Downregulated gene | ANXA8L1 | 8.31E-07 | -4.01390737274359 | -3.50070270215942 | -3.57843404090089 | -4.59993060231332 | -3.14327876478425 | -3.27378446113741 |
| Downregulated gene | DFNA5 | 9.34E-07 | -3.45466402321795 | -3.55686120804324 | -3.41287720857935 | -3.85739330130953 | -3.8080456222642 | -3.2103157371947 |
| Downregulated gene | PRG4 | 8.77E-06 | 0.201969593474359 | -4.01866785370057 | -3.00381166618157 | -4.89322078023269 | -3.87186468531393 | -4.2569694777535 |
| Downregulated gene | ABCA8 | 9.88E-06 | -1.09584705896154 | -4.17080721972992 | -4.22545740444906 | -3.846050795717 | -2.1392502260337 | -2.20590587775568 |
| Downregulated gene | PROCR | 2.68E-05 | -3.64928975826923 | -4.17760705078739 | -3.46756011112959 | -3.94683500929383 | -3.83289029477941 | -3.23945696048542 |
| Downregulated gene | CHGB | 3.51E-05 | -0.387753206769232 | -3.78982970911317 | -2.10568351274429 | -3.8974390828382 | -2.4434934869352 | -3.40571709602197 |
| Downregulated gene | AOX1 | 4.35E-05 | -1.90771508421795 | -3.06265133352324 | -2.85914115331948 | -4.20207300092803 | -3.12708199510929 | -3.26117759538532 |
| Downregulated gene | CALB2 | 5.35E-05 | -0.0406872759487182 | -2.84357382584924 | -4.02765216447679 | -5.14005699258388 | -2.83046270028325 | -3.31289274268655 |
| Downregulated gene | HAND2-AS1 | 7.93E-05 | -0.85136530044872 | -3.39278655834965 | -1.46842973997921 | -3.26444229026786 | -2.61262693162415 | -2.78811264544186 |
| Downregulated gene | BNC1 | 8.84E-05 | -3.93993959680769 | -5.27411075798053 | -3.78179332837145 | -5.61210531238366 | -3.2306933209756 | -3.36302506117159 |
| Downregulated gene | BCHE | 9.83E-05 | -3.7419078298718 | -5.26637027905247 | -4.45798258340956 | -5.00858934568453 | -5.92597915893043 | -4.70449487678779 |
| Downregulated gene | CLEC4M | 0.000112805 | -0.0913464432051292 | -3.69399535058224 | -2.52354574984061 | -5.12626380818452 | -2.52009421090979 | -3.74114339038712 |
| Downregulated gene | NPY1R | 0.000112805 | -2.01000255407692 | -5.13814286098236 | -3.68981145591129 | -5.60118471532468 | -4.59962689382947 | -4.55092861614849 |
| Downregulated gene | TCEAL2 | 0.000115086 | -2.55839964276923 | -4.08076698416289 | -4.12746825689536 | -4.50269190242154 | -4.92157122049057 | -4.85596029902036 |
| Downregulated gene | MNDA | 0.000122899 | 0.797473961384614 | -4.30892881952764 | -4.48467050848233 | -3.4938248845184 | -4.29642816195271 | -3.91868234317595 |
| Downregulated gene | PDE8B | 0.000131395 | 0.190003040833334 | -2.89551839051911 | -2.40211792239779 | -3.31437438839286 | -1.93994597652086 | -2.56356007585824 |
| Downregulated gene | REEP1 | 0.000133696 | -0.43812932646154 | -2.84492553725477 | -3.47879325588358 | -3.64604519239448 | -3.55757363680017 | -3.60941152320909 |
| Downregulated gene | ADH1C | 0.000153357 | 0.0606569171153826 | -3.27582156855199 | -1.47181950900901 | -3.67430815501082 | -2.48227501793486 | -2.54082229154025 |
| Downregulated gene | SPOCK1 | 0.000228 | -3.54087827765385 | -4.28510492793696 | -3.28404297165627 | -4.84130897540855 | -3.46649890829912 | -3.60617070440956 |
| Downregulated gene | KDR | 0.000249933 | 0.0768781270384622 | -3.30165816535849 | -3.11152830834373 | -3.65582323849838 | -3.61573422165162 | -3.48509874863911 |
| Downregulated gene | GADL1 | 0.000391544 | -0.342781087923076 | -3.43008979986825 | NA | -3.1738185372619 | -2.84960082210115 | -3.16304184001743 |
| Downregulated gene | SFRP1 | 0.000494682 | -0.0949258450256441 | -3.30958058468092 | -2.48179458221761 | -4.21898759133929 | -2.23743327435883 | -2.61982228011847 |
| Downregulated gene | BAMBI | 0.000559932 | -4.48313333941026 | -2.55683420978655 | -2.06095919747748 | -2.8893307862987 | -2.18739591702059 | -2.53447363388987 |
| Downregulated gene | LGALS2 | 0.000560898 | -0.624039546730771 | -3.33594745201954 | -2.1851384797921 | -2.64944639294102 | -2.99212149605707 | -2.5164678839732 |
| Downregulated gene | DIRAS3 | 0.000673173 | -3.16464673546154 | -4.29427809579643 | -2.81201588759529 | -4.40685557786527 | -2.94218649353924 | -4.16436033210568 |
| Downregulated gene | C21orf62 | 0.000709657 | 0.0984143052179478 | -1.08420534045738 | -2.09798349910603 | -1.48403445420996 | -2.11925860558144 | -2.27203020706316 |
| Downregulated gene | TCEAL7 | 0.000714303 | -3.31056537033334 | -4.2156231406608 | NA | -3.1555425472592 | -3.40569882448605 | -3.22426817248277 |
| Downregulated gene | OGN | 0.000802516 | 0.761120405820511 | -5.07699582750311 | -2.3505128251975 | -4.07318974037338 | -4.83120294533262 | -4.09616150940284 |
| Downregulated gene | SYT4 | 0.000915574 | 0.0654063684358945 | -3.53928196725765 | NA | -3.61295902671537 | -2.78575991697736 | -3.05904983879422 |
| Downregulated gene | LOC100506718 | 0.001181164 | -0.218901831230769 | -2.85913945804813 | -2.31107018054055 | -3.04864826373647 | -3.0262365367105 | -3.32594779696979 |
| Downregulated gene | GPRASP1 | 0.001181164 | -1.24432313455128 | -3.63620279535283 | -3.01572357204435 | -3.26737847191559 | -3.24706957199959 | -2.78396463583097 |
| Downregulated gene | NELL2 | 0.00160714 | 0.597561748333334 | -3.07541827048374 | -3.7951809321691 | -3.67772756494589 | -2.98777430549664 | -2.99742804398921 |
| Downregulated gene | AADACL2 | 0.002140554 | 0.196078442320512 | -3.56693565491973 | NA | -4.38339482119048 | -2.70168349684605 | -2.97048242429385 |
| Downregulated gene | GHR | 0.002518165 | -2.46383780694872 | -3.6884200696566 | -2.51687490425502 | -2.92732422720779 | -3.60605092604408 | -3.22506816047794 |
| Downregulated gene | ADH1B | 0.002944239 | 0.606107217346151 | -3.22779270304627 | -2.79682132590437 | -3.03144974520022 | -3.09564042122267 | -2.64293553189195 |
| Downregulated gene | MGARP | 0.003350562 | -4.9133080968718 | -4.66893886337903 | NA | -5.3383832192316 | -4.33680215639082 | -4.30713971963617 |
| Downregulated gene | IGFBP6 | 0.003959491 | -2.32908372385898 | -3.43220265567562 | -2.37000095625779 | -3.740074524467 | -3.31936559868446 | -2.75761892487424 |
| Downregulated gene | GFPT2 | 0.004012993 | 0.322847481705125 | -3.32821024114879 | -2.23011705280665 | -1.50805355123377 | -2.77757795274745 | -2.3711779954393 |
| Downregulated gene | OLFML1 | 0.005032308 | -0.00350790775641308 | -2.57375845503567 | -2.44280498589051 | -2.88781192762446 | -3.59616931622982 | -2.83933792246875 |
| Downregulated gene | NAP1L3 | 0.005032308 | -3.20093469157693 | -3.25684769556487 | -3.29584227215523 | -3.33335262563853 | -3.58494498859383 | -3.37362672921335 |
| Downregulated gene | HBB | 0.00546088 | 1.01374893076923 | -4.24854689241339 | -3.43836282209286 | -5.15507288786797 | -3.8915338405204 | -3.47689947688722 |
| Downregulated gene | DAPK1-IT1 | 0.00546088 | 0.58366922774359 | -2.60617264902639 | NA | -2.00090156690476 | -2.21825027862481 | -2.03568296919801 |
| Downregulated gene | ALDH1A1 | 0.005647822 | 0.675084987679487 | -3.16253228199599 | -2.78857077079695 | -3.7983326721618 | -3.51522161665478 | -3.55970040569593 |
| Downregulated gene | LRRN4 | 0.006134769 | -3.35214600521795 | -1.96972432661857 | NA | -2.28631921989989 | -2.55538390119693 | -2.68916603244224 |
| Downregulated gene | HAS1 | 0.006301364 | -0.969058225205129 | -4.0116367333935 | -2.08244396913375 | -5.11469525001624 | -1.97275965771042 | -2.79939456388064 |
| Downregulated gene | LXN | 0.007055138 | -3.1633275549359 | -1.19431431140512 | -2.62267803740817 | -2.31954554005953 | -3.32828368326151 | -2.50437292866544 |
| Downregulated gene | CLDN15 | 0.007480477 | 0.492718058038463 | -1.64972298786008 | -2.33912806838531 | -2.06458539615801 | -2.37885547241316 | -2.36816066898902 |
| Downregulated gene | PDGFD | 0.007580614 | -0.564312386769233 | -2.45038299694196 | -3.06824728490644 | -2.69733922352544 | -2.41358840867522 | -2.08884590162538 |
| Downregulated gene | PRSS35 | 0.007661209 | -0.98764017146154 | -4.48176956154633 | NA | -4.90510003967803 | -2.62291871179553 | -4.16670682276941 |
| Downregulated gene | HBA2 | 0.008425719 | 2.17237420915385 | -3.25659075333392 | -2.81629099672903 | -4.23724543970239 | -4.06660484361384 | -3.39964511370123 |
| Downregulated gene | WNT2B | 0.008544536 | -2.85554566617949 | -1.9504965286832 | -1.63236554745669 | -2.82003842103626 | -2.47481544806223 | -3.16439015196771 |
| Downregulated gene | CHRDL1 | 0.009342765 | -0.648632221153848 | -4.03215257905268 | -3.70003573858628 | -4.27371177230249 | -3.76524873369929 | -3.4640785860732 |
| Downregulated gene | LOC101930363 | 0.010336008 | 0.644799499628204 | -4.23259522177299 | -4.70331588593208 | -4.59885187670726 | -4.2635633561327 | -4.21134729916411 |
| Downregulated gene | PAPSS2 | 0.011409846 | -2.64714621115385 | -2.18672850352656 | -1.34901344450451 | -2.52595221022728 | -2.31230669924534 | -2.11093958421241 |
| Downregulated gene | FLNC | 0.013891594 | -2.4257919504359 | -2.08961283835678 | -0.707064707595289 | -2.16279120085228 | -2.16307640150981 | -1.61150083301203 |
| Downregulated gene | PLPP1 | 0.013891594 | 0.0242930437692293 | -0.937461689459003 | -2.16541647433125 | -2.45082288811418 | -2.57401877239298 | -2.07866521044063 |
| Downregulated gene | AQP9 | 0.01470235 | -0.0356552018589724 | -2.91051899543057 | -2.7384345772973 | -3.4432571199973 | -2.94914936331564 | -2.44785996536714 |
| Downregulated gene | TMEM255A | 0.022234924 | -1.51550469974359 | -1.42697443253063 | -2.70696622259182 | -3.85093050219697 | -3.69537986344827 | -3.00606300429451 |
| Downregulated gene | HOXC6 | 0.02283011 | -2.81277208717949 | -1.33451533350096 | -2.00284758960499 | -3.03426652046537 | -2.12848469604885 | -2.04553730042102 |
| Downregulated gene | LOC101926921 | 0.023474998 | -0.508754506230769 | -4.6574064689557 | -3.31369897564795 | -3.84314936358766 | -3.85636311542382 | -3.28347786164195 |
| Downregulated gene | PCOLCE2 | 0.024133922 | -0.0890281612051282 | -3.88403828061863 | -2.20930449031185 | -2.95789663075488 | -3.29246458827618 | -2.26289044612689 |
| Downregulated gene | RNASE4 | 0.025494731 | -1.79460019247436 | -2.76929848757143 | -2.24111529857242 | -2.92235169960769 | -3.06419376406601 | -2.85806444434517 |
| Downregulated gene | TCF21 | 0.026005005 | -0.150344360679489 | -2.50306622855103 | -2.33741152945253 | -3.50164988148269 | -1.92938792083268 | -2.40629723487642 |
| Downregulated gene | LOC101928635 | 0.02701452 | -1.91485883583334 | -2.82806965908829 | -4.54645074819127 | -4.16412790756494 | -1.66359192457823 | -2.20684931354441 |
| Downregulated gene | PKD2 | 0.028097121 | -2.22721401210256 | -2.4426536918147 | -2.35874090758143 | -2.11799448469156 | -2.8208345616043 | -2.37964525063523 |
| Downregulated gene | WNT5A | 0.029116939 | -2.21717274960257 | -4.11157208680458 | -2.19976142773388 | -1.96038640156115 | -3.31310441415165 | -2.19679280597585 |
| Downregulated gene | FGF13 | 0.031542568 | -0.327364821307693 | -2.98433712781704 | -2.75179977624394 | -2.77455007930736 | -2.73006784735732 | -2.73935500768428 |
| Downregulated gene | LHX2 | 0.032485481 | -0.500305592346155 | -2.59269657272393 | -1.92796109058905 | -2.83737072132305 | -2.00480963932519 | -2.49480466682775 |
| Downregulated gene | ATP10D | 0.033214564 | -3.31612583634615 | -2.38372045628002 | -2.26958988224532 | -1.95961927487283 | -2.57989672775732 | -2.08503189204744 |
| Downregulated gene | ARHGAP18 | 0.039979167 | -0.328852512179489 | -2.32339535949628 | NA | -2.37507014877165 | -3.25477479479328 | -2.76979446899214 |
| Downregulated gene | LOC286191 | 0.044474335 | 0.930523300153843 | -2.77185842551923 | NA | -3.60717508787338 | -3.14345434377352 | -3.04344188442775 |
| Downregulated gene | EFEMP1 | 0.046919129 | -1.47562009066667 | -3.85167746313435 | -4.2056115726542 | -3.3637073665368 | -3.67711748369879 | -2.8571723818785 |
| Downregulated gene | LOC100996760 | 0.048042277 | -3.33383443474359 | -4.06698171435453 | NA | -4.39299326715639 | -2.86963390969869 | -4.57949477124621 |

**Supplementary Table 4** Information for the detailed expression data for each included sample

| **Gene** | **GSM350609** | **GSM350610** | **GSM350612** | **GSM350613** | **GSM350614** | **GSM350615** | **GSM350616** | **GSM350617** |
| --- | --- | --- | --- | --- | --- | --- | --- | --- |
| CD24 | 11.0259354556089 | 9.47877972942661 | 11.0640039386395 | 11.5496755873209 | 11.3294992492141 | 9.56818732526779 | 10.6116611400542 | 11.4893914026396 |
| CLDN3 | 9.35072927955643 | 8.90275194485016 | 10.4676972438877 | 9.03869955130559 | 9.56187979656388 | 8.23935985027747 | 9.8086022494984 | 9.74842768780748 |
| C1orf106 | 8.68113297345181 | 7.98652470797722 | 7.3027759904392 | 8.11904486000033 | 8.84874811461196 | 7.67299099382775 | 8.04001567884788 | 8.15992177977907 |
| CRABP2 | 8.60321832725732 | 9.31440197555936 | 10.6406155057733 | 10.2573406950255 | 10.3752241018743 | 7.45885770533525 | 9.98894025971161 | 8.6085135781513 |
| SOX17 | 7.93389716093449 | 7.65144640447807 | 8.22383278696728 | 8.9109574659632 | 8.14323013477689 | 7.33320008434702 | 9.16343583439949 | 8.06923492480854 |
| ELF3 | 9.18198872029385 | 9.91182139162522 | 8.41859758834343 | 8.15468311203924 | 8.42778772590303 | 8.69966499794793 | 7.94059745636125 | 9.47219665846718 |
| EPCAM | 11.8253682678151 | 10.2606137957184 | 10.9238696942174 | 11.2965319722204 | 11.0675755309038 | 9.39906425521935 | 10.7132748070059 | 10.5143885974974 |
| SCGB2A1 | 8.85779442767154 | 8.44344089114443 | 11.4033902286053 | 8.40045254027644 | 8.73579292798531 | 5.18428029441938 | 7.51766938813381 | 10.5479837847574 |
| KLK6 | 8.42752237068255 | 9.42328402213388 | 9.5837597536395 | 7.4075227099128 | 9.62997582595894 | 8.86974805146506 | 8.46168407036868 | 7.34029521043048 |
| MMP7 | 7.15086426752783 | 9.15332401974237 | 6.81723951098945 | 10.4893261683006 | 8.91587937883577 | 9.35939817627605 | 6.44028782084042 | 10.8871596766929 |
| CLDN4 | 8.92702234897247 | 8.93784458724411 | 8.95246461919631 | 8.80949483468515 | 8.90957811596192 | 8.47143135800232 | 8.63569998451573 | 8.99135177376779 |
| CKS2 | 7.68481873755322 | 8.19145408128725 | 8.95503957510539 | 8.21135296267561 | 8.13488831938401 | 8.79233480570669 | 9.1815498441197 | 7.80935012865107 |
| CP | 8.68178305373698 | 8.6812647701553 | 6.66814040405437 | 8.33212608445309 | 9.45152022765129 | 8.93110683302934 | 8.65562910569967 | 8.1154988923629 |
| PSAT1 | 7.9078821076559 | 7.54210324585659 | 7.96127603960943 | 8.30918073591969 | 9.20477897517441 | 8.25223965633698 | 9.84418790164308 | 9.3077927961299 |
| MECOM | 6.86678436977734 | 6.27798474729977 | 6.95431265207001 | 8.52342081594279 | 6.89120043280656 | 7.51469038704007 | 9.26354620878902 | 7.83168726708308 |
| ESRP1 | 7.62333283245184 | 8.48759889472325 | 9.34605935673029 | 9.82134350044688 | 9.08470210801199 | 8.37003346932942 | 9.05341005638703 | 8.57514212015196 |
| WFDC2 | 11.173000389227 | 9.80057100236279 | 10.1444967972434 | 8.51926930957091 | 9.67730268480391 | 10.4670314857455 | 11.3574970228143 | 9.30108459093582 |
| CEP55 | 7.41430469462396 | 7.50787390697935 | 8.14633955732123 | 8.18992337022493 | 8.01875655947608 | 8.15638650345768 | 7.24972975607757 | 7.07167687375186 |
| MUC1 | 10.0229872994935 | 10.8782808670431 | 9.73848637912404 | 9.60473853445992 | 10.7147120278425 | 10.4003422418322 | 8.11766041362571 | 9.45472425947159 |
| MCM2 | 7.68390694892657 | 7.11696769451173 | 8.27747339233623 | 7.95128471496697 | 8.7867923669235 | 7.6035521685271 | 8.74251155082808 | 8.45252954467793 |
| FAM83D | 7.43704459345534 | 6.38801728534513 | 7.3876727200125 | 7.16551001804135 | 8.18853939515837 | 7.46172499150271 | 7.21062264439691 | 6.92124588858559 |
| ZWINT | 7.56338696616201 | 6.87369018023572 | 8.29052577528748 | 8.47358399806519 | 8.73152269124339 | 8.2045711442492 | 9.03754695396218 | 8.44165776372012 |
| NEK2 | 6.22853012262995 | 6.09127669436522 | 6.51017075115177 | 6.83333287887259 | 6.77353486310051 | 6.66355810421727 | 6.49793165189628 | 5.85561602278684 |
| BUB1B | 6.92195991732617 | 7.02890061573433 | 7.38724189758839 | 8.0604797814076 | 7.82553125118962 | 8.13437497784683 | 7.4310378743783 | 7.07103324445682 |
| DLGAP5 | 6.02258974904011 | 5.33771109212829 | 6.05549936581374 | 7.28900445554244 | 6.48848287444453 | 6.22920335788675 | 6.00180224263399 | 5.61823865559545 |
| MELK | 6.72027846523333 | 6.88264304936184 | 7.06361079526034 | 8.48188013962029 | 8.27300294803988 | 7.9732094505776 | 7.22216698262345 | 6.79882817809111 |
| FZD10 | 7.51656677149686 | 8.5848497857681 | 6.71493235178568 | 7.13668357769724 | 7.66533591718518 | 6.91109233158713 | 6.7292808460274 | 5.54905302933729 |
| LPAR3 | 6.49016896951686 | 6.94743238947137 | 8.14317910476288 | 9.70473366267406 | 8.25719924277855 | 6.54480991902226 | 8.41030294026616 | 8.12205144771389 |
| ITLN1 | 6.70251902915328 | 6.84686936054923 | 6.84624256510951 | 6.67511021524523 | 6.78489653520832 | 6.76937504934982 | 6.09021830165332 | 6.17652224654896 |
| LINC01105 | 5.27301850684344 | 5.74380226130503 | 5.47951093581672 | 5.53242085582001 | 5.53884852074424 | 5.45954080028959 | 5.36667191611176 | 5.24107745817504 |
| ANXA8L1 | 7.72744401433118 | 8.40207407351685 | 7.49177294437872 | 7.07446262070454 | 7.23294849971066 | 7.51404333596374 | 6.99525837340469 | 7.1333991254172 |
| DFNA5 | 7.83535567381066 | 6.66092291396456 | 6.85249829878989 | 6.54812832358559 | 6.54550510069107 | 6.46939761687655 | 6.77386449388333 | 6.2364926183813 |
| PRG4 | 4.93262815702213 | 4.8293421939028 | 4.80580834870147 | 5.09169983413681 | 4.83491342970104 | 5.03650333373899 | 3.99638874644762 | 4.43028527297778 |
| ABCA8 | 5.54432052652877 | 5.63874954388354 | 5.88947354253111 | 5.41571361539534 | 5.82298501854688 | 5.23789521558811 | 5.90175188035312 | 5.81292601596398 |
| PROCR | 4.02768487693716 | 5.06350294230616 | 5.35191096110308 | 5.12474169241965 | 5.09085343045111 | 4.72628628972067 | 5.67553368622549 | 5.915759896038 |
| CHGB | 8.05929037564791 | 7.20896588630656 | 5.50143914515887 | 5.47281266619239 | 5.33628338786443 | 5.55887985347544 | 5.46237957184102 | 5.49313492230551 |
| AOX1 | 6.38050435611359 | 6.36614733152048 | 6.38930867290642 | 6.03507399737762 | 6.58451158806211 | 6.33333427813435 | 6.92142442890398 | 6.33342373372519 |
| CALB2 | 9.37623394012389 | 8.8330165608111 | 8.69630686400424 | 8.09296850932414 | 8.09961081196091 | 7.83080039032852 | 7.65849713665648 | 7.97899639608894 |
| HAND2-AS1 | 5.63037634701521 | 5.64385618977472 | 5.89784545600551 | 5.73457414954252 | 5.71039319217052 | 5.4820415419856 | 5.29314973674186 | 5.54689445988764 |
| BNC1 | 3.87627136055013 | 5.37903173202854 | 5.4920133868738 | 4.47378691161437 | 4.81762325751143 | 4.94181057995768 | 4.01836711554312 | 3.80838505065609 |
| BCHE | 4.06004738366994 | 3.87676249078156 | 5.74550626586916 | 4.4154882710497 | 5.49185309632967 | 4.51916444980607 | 4.98322165074267 | 5.27947129564447 |
| CLEC4M | 6.28771237954945 | 6.28160552892904 | 6.51017075115177 | 6.0036022366802 | 6.13288525362516 | 6.16581146920892 | 6.12319024045716 | 6.16902303514792 |
| NPY1R | 4.14404636961671 | 3.4931349223055 | 3.92789645372882 | 3.99367436175058 | 4.94673086014031 | 4.10181813422741 | 5.15218341905505 | 4.47313748777226 |
| TCEAL2 | 5.36352154354655 | 5.54997714277182 | 6.22245682592747 | 5.63372181264101 | 5.88362081628567 | 5.28466218548316 | 6.70431867776083 | 5.32840565895857 |
| MNDA | 6.26622434219163 | 6.32174774673526 | 6.56056211851471 | 6.5765221379205 | 6.26528685756517 | 6.15015345524625 | 5.6906964439777 | 6.28632672709055 |
| PDE8B | 5.86525898692639 | 5.90881290773955 | 5.8279036026748 | 5.7751383493035 | 6.08158107202293 | 5.77038850760014 | 5.6876206320849 | 5.44570462449179 |
| REEP1 | 6.68306478611185 | 6.703695976489 | 6.601993581249 | 6.40837220357268 | 6.80135269277206 | 6.61235249875266 | 6.26791028088483 | 6.12350066435096 |
| ADH1C | 4.76394266044725 | 4.68313498512609 | 4.834407841807 | 4.18269229751619 | 4.69766263347052 | 4.55151601762801 | 4.61412086878925 | 4.51032901949057 |
| SPOCK1 | 7.10611795907107 | 5.96855160336395 | 6.65334669272218 | 7.08682621770207 | 6.59738218934868 | 5.21684284283726 | 6.1471031439241 | 6.76460624310965 |
| KDR | 6.59365255839793 | 6.33771109212829 | 6.54426899048081 | 6.78384949167809 | 6.49329507050358 | 6.83263688756687 | 6.83099048124926 | 6.57258654938577 |
| GADL1 | 4.52293456094346 | 4.91312876781974 | 4.80064109732908 | 4.7338966052475 | 4.86690797814317 | 4.91695427895322 | 4.69655030107857 | 4.82171021503467 |
| SFRP1 | 5.56353950317219 | 5.74274731558099 | 6.87921563716567 | 5.61353165291793 | 5.74859540599096 | 6.05891172262887 | 5.85711014050826 | 6.14496408215202 |
| BAMBI | 5.36772051340145 | 5.06134418828839 | 5.49121175600309 | 5.69627208392586 | 5.34731131636529 | 5.03782146543497 | 7.25823623733097 | 5.38301301548867 |
| LGALS2 | 5.87159726561385 | 6.27071580787426 | 6.16852169899217 | 6.02657877012771 | 5.82883464946806 | 6.43646170318241 | 6.31885910596865 | 6.40514146313634 |
| DIRAS3 | 4.69710657447698 | 4.43162295971329 | 4.75274859140713 | 4.56803210477128 | 4.65363331138625 | 4.28835856219366 | 6.21276386390212 | 4.49697358099828 |
| C21orf62 | 6.54951516004677 | 6.7935057716697 | 6.80251636512122 | 6.63763922502473 | 6.60229058486114 | 6.49505552836802 | 6.43053618373656 | 6.54812832358559 |
| TCEAL7 | 5.16349873228288 | 4.674686619928 | 5.67919857056692 | 5.03254169727004 | 4.88068552526112 | 4.10349763970334 | 5.5385381636298 | 5.68929916053589 |
| OGN | 6.08342613943746 | 5.89760347428054 | 6.37094889882513 | 6.28364401937092 | 6.16400181665555 | 6.00708334724386 | 6.42189651204225 | 6.40854204229686 |
| SYT4 | 7.08703845676695 | 6.43945691887603 | 6.13154832972926 | 6.38629363515099 | 6.27947129564447 | 6.07959144864819 | 6.03254169727004 | 6.00157708538953 |
| LOC100506718 | 5.64318278456908 | 5.93977500794774 | 6.36667191611176 | 6.18103627990192 | 5.95116812883891 | 5.93632392728242 | 7.34999622137019 | 6.80490541467528 |
| GPRASP1 | 6.62249115206117 | 6.17672169288105 | 6.56879217804153 | 6.32210842049736 | 6.70570149684579 | 6.28243980500639 | 7.15279185163912 | 6.5505928897043 |
| NELL2 | 6.93274625099681 | 6.96613048992893 | 6.82705683650015 | 6.78528898070402 | 6.80180534355842 | 6.78502736223547 | 6.5158575012579 | 6.8164717115882 |
| AADACL2 | 4.89869207256049 | 4.80374366850523 | 4.56071495447448 | 5.06436554026363 | 4.66618848987278 | 4.95977015521147 | 4.99050111136325 | 4.7457751494858 |
| GHR | 4.00809242094872 | 4.15299460549244 | 4.9217219470096 | 4.62058641045188 | 5.52888382727464 | 4.31469652565629 | 5.68032435684402 | 5.30852106219326 |
| ADH1B | 6.15527362503996 | 6.55539438727663 | 6.3951913609566 | 6.38059093426592 | 6.40735275114004 | 6.62014649733949 | 6.74950074741366 | 7.09821635705433 |
| MGARP | 4.14159627838382 | 4.74953426766926 | 6.01903466936434 | 5.1509657835565 | 4.29498826769145 | 4.38612115681485 | 6.53309607856156 | 5.8285808102766 |
| IGFBP6 | 11.1567088249159 | 6.42894634476948 | 6.14282184411593 | 6.29462074889163 | 6.8072261042495 | 7.47013009399538 | 7.87369018023572 | 6.28447711781042 |
| GFPT2 | 7.94573644261376 | 7.56993153765077 | 8.12329372251013 | 7.49449561566805 | 7.762880292917 | 7.13051908302734 | 7.39651915875738 | 7.50723965075508 |
| OLFML1 | 6.76937504934982 | 6.94965165119522 | 6.83642913116165 | 7.08608313499654 | 6.80542144617176 | 6.41717741190639 | 6.83617662480922 | 6.95628902658394 |
| NAP1L3 | 4.78868571061353 | 4.09000652990382 | 5.14934066928622 | 4.9126498648972 | 4.98413359454098 | 3.96993327469786 | 5.82374936030827 | 5.3547342399706 |
| HBB | 7.59406329008494 | 7.72437742160622 | 8.24622992469156 | 7.45452550033901 | 8.04618271709909 | 7.18197216055583 | 8.53041609159646 | 7.80300095171512 |
| DAPK1-IT1 | 5.790772037862 | 6.57031112431881 | 6.02923200313464 | 6.5505928897043 | 6.12804589092299 | 6.66576226650835 | 6.23150921086705 | 5.57167680997093 |
| ALDH1A1 | 5.7292808460274 | 5.47961860846942 | 5.87184364850932 | 5.86418614465428 | 5.95210055416844 | 6.49537538094463 | 7.99135177376779 | 7.0961353249095 |
| LRRN4 | 5.51774811422812 | 5.42861141846713 | 5.9047249283904 | 5.04308198189566 | 5.22843392051337 | 5.61102479730735 | 4.74926608381481 | 5.1333991254172 |
| HAS1 | 5.76075320806299 | 5.80219321694183 | 5.62673115067279 | 5.5737986435893 | 5.84599177066457 | 5.53791724903408 | 5.69348695749933 | 5.93002764088174 |
| LXN | 6.72424097718933 | 6.6101389837055 | 8.34460660877343 | 7.26566192452189 | 7.48196084306007 | 7.22727899446832 | 8.13709360897494 | 7.58653958611069 |
| CLDN15 | 7.94216258558121 | 7.64255717959562 | 7.85788771441539 | 7.47037417041625 | 7.68151954297972 | 7.35966172233388 | 7.50823055360657 | 7.61389994103697 |
| PDGFD | 6.70977310785294 | 6.72328550477764 | 7.35772793231062 | 7.12391445900198 | 6.7371459197762 | 6.57160097245201 | 7.03446885159095 | 7.51301692817484 |
| PRSS35 | 3.67694435910691 | 4.18903382439002 | 4.01881218574282 | 3.76341157447001 | 3.79805051476751 | 4.47378691161437 | 5.10894256866079 | 4.2667865406949 |
| HBA2 | 6.7774635480548 | 9.34982672871894 | 7.65985322084749 | 6.8317717073303 | 8.87879685229145 | 6.9999624668986 | 8.77545116239145 | 7.74227574754027 |
| WNT2B | 5.65599574517798 | 5.81966818349646 | 5.5573488175248 | 5.65363331138625 | 5.45582036508492 | 5.52497259828663 | 5.33904828291907 | 5.38663852997474 |
| CHRDL1 | 5.61970645004589 | 5.90785207184596 | 5.67270819562222 | 5.47281266619239 | 7.3169602873649 | 5.5552026338783 | 6.39420543035888 | 6.52403232340592 |
| LOC101930363 | 7.61338431134185 | 7.36920472277894 | 6.5573488175248 | 6.59275601044103 | 7.28798935040895 | 6.6560672737256 | 6.71011763204345 | 6.46254317053042 |
| PAPSS2 | 6.44377239276374 | 6.45220004940622 | 6.81348197729922 | 6.91810791392287 | 6.66092291396456 | 6.49265437101891 | 6.75350648947703 | 6.7144745032856 |
| FLNC | 6.28835856219366 | 6.7001622501066 | 6.68495896159385 | 6.4594316186373 | 6.81301154860562 | 6.22322945684211 | 7.03088779930043 | 6.55274593674845 |
| PLPP1 | 8.09238717168052 | 7.88929100377704 | 8.26704414180993 | 7.81643971107713 | 8.45731931182539 | 7.17697096202846 | 7.85340313258764 | 8.26235328550164 |
| AQP9 | 6.87639415878324 | 7.16802018856167 | 6.56224242422107 | 6.60184505651104 | 7.66562016406638 | 6.39059890555246 | 6.22438762792991 | 6.25587835258279 |
| TMEM255A | 4.46008724011683 | 3.7235585614721 | 4.42155994490182 | 3.82476785314329 | 4.20398416585599 | 3.57046293102604 | 3.54596836910529 | 3.92884403671257 |
| HOXC6 | 5.67214243285383 | 8.91749142883502 | 7.11322124347957 | 6.08151006812092 | 7.87516570584723 | 7.91127213280967 | 7.19515071056471 | 6.59991284218713 |
| LOC101926921 | 6.57124701636741 | 6.23907338337891 | 7.24873405820357 | 7.05889368544683 | 6.61485705038449 | 6.34890516116841 | 6.7924866555555 | 7.20998940270423 |
| PCOLCE2 | 6.79272523330573 | 6.40548188197721 | 6.6646250548693 | 6.39248916196602 | 6.66476725535641 | 6.13422093976063 | 6.19455988602261 | 6.18169891109611 |
| RNASE4 | 5.60139939053183 | 5.59738218934868 | 5.96034952755004 | 5.46287031226445 | 6.02469644009399 | 5.01256867350306 | 6.83813239405015 | 6.10998731853691 |
| TCF21 | 6.13811817761461 | 6.04330075436418 | 6.34234139743155 | 5.90315881111987 | 6.00842862207058 | 5.83769100042856 | 6.61772457453495 | 6.08915913191124 |
| LOC101928635 | 6.97280751368673 | 7.29852085712595 | 6.78653102096184 | 6.6562103201826 | 6.71094415457587 | 7.12101540096137 | 6.40198877508416 | 6.32327998788732 |
| PKD2 | 6.99559757832201 | 6.38491323074869 | 7.63030353327502 | 6.6160341601211 | 7.30961277245412 | 6.74416109557041 | 7.5186924924252 | 7.23553560671046 |
| WNT5A | 6.5385381636298 | 5.02746372340858 | 5.73077579651205 | 6.35843142862635 | 6.2881739681123 | 5.42408228666134 | 7.3390928346072 | 5.96670731415032 |
| FGF13 | 5.96947286459633 | 5.67327373660982 | 6.05506547256509 | 7.17891378466957 | 6.11540785541406 | 5.16027483140859 | 5.54905302933729 | 5.65563804923464 |
| LHX2 | 5.97968241371522 | 6.04734207256218 | 5.91838623444635 | 5.38973887867698 | 6.78855521492886 | 5.43662826729284 | 5.08448952493625 | 5.51048727046873 |
| ATP10D | 5.45746296464855 | 5.24222139509837 | 6.24488705912353 | 5.46564802598228 | 5.37295209791183 | 3.99457972421575 | 6.1438423541966 | 6.11748726632592 |
| ARHGAP18 | 7.08030234954589 | 7.47727256504522 | 7.51651421865329 | 7.77667428615585 | 7.3082480054988 | 7.15768374386034 | 6.97514100892127 | 7.07852444538908 |
| LOC286191 | 6.20593983247088 | 7.44136727845972 | 6.58150189667979 | 6.99344793233148 | 6.69974594797101 | 7.46613765607043 | 6.99254185910911 | 7.10611795907107 |
| EFEMP1 | 5.42794133250948 | 6.08484388351087 | 7.1130823337595 | 6.47832471148503 | 7.06709369929941 | 5.45362720933769 | 6.30292826535634 | 6.88056309177008 |
| LOC100996760 | 5.21295836272829 | 5.1333991254172 | 3.95977015521147 | 4.21334728173344 | 4.13010717865883 | 4.87184364850932 | 4.32553033156756 | 4.94860084749336 |

| **Gene** | **GSM350618** | **GSM350619** | **GSM351318** | **GSM349155** | **GSM351320** | **GSM461348** | **GSM461349** | **GSM461350** |
| --- | --- | --- | --- | --- | --- | --- | --- | --- |
| CD24 | 11.4150586341133 | 10.228782622669 | 6.5604602137839 | 6.18913268990596 | 6.12759888325415 | 12.3218460956319 | 12.5004647282989 | 11.2078856346106 |
| CLDN3 | 8.68748066652176 | 9.60440496763545 | 5.5552026338783 | 5.43529521564717 | 5.56147889150101 | 10.0208570477116 | 9.46406783588433 | 9.43062399219369 |
| C1orf106 | 6.67849450777373 | 7.02070220379105 | 5.44691786486603 | 5.27426166125705 | 5.07937811111865 | 9.68814363319239 | 9.51852136973933 | 8.76053034741709 |
| CRABP2 | 9.56643464628328 | 9.6814668350521 | 6.31179371775365 | 6.71438291065141 | 6.36632221424582 | 10.9448730834671 | 10.1535773641466 | 9.07699725832199 |
| SOX17 | 7.86656802965019 | 10.4118022516603 | 4.80167602925359 | 6.7235585614721 | 6.07178411738996 | 10.7558431380319 | 10.5725060226858 | 9.29443925195292 |
| ELF3 | 8.40731025831819 | 7.81800690198674 | 5.28342796468091 | 5.27897596208859 | 5.33782999184213 | 9.57795369226306 | 9.05910106156115 | 8.1551639752404 |
| EPCAM | 9.84971784645969 | 10.5587268229751 | 4.77768271707355 | 5.07510472220949 | 4.81044310384517 | 13.1773074070742 | 12.1323679853134 | 11.197935403837 |
| SCGB2A1 | 9.05736903706797 | 10.1233066572449 | 3.92314918047231 | 3.46858331700683 | 3.75274859140713 | 10.2344701847152 | 9.4470232849126 | 8.2402379942433 |
| KLK6 | 9.01931272565139 | 7.65592421308382 | 5.73849764388979 | 5.74846123300404 | 5.54720302475693 | 9.98683753671616 | 8.82444646899185 | 10.0459780282111 |
| MMP7 | 10.957595434361 | 8.79070688578391 | 5.14893410452634 | 5.41278152533848 | 5.43596189543763 | 10.1257879801165 | 9.72543783697251 | 9.92952916598975 |
| CLDN4 | 7.75288236627309 | 8.66241915312174 | 5.56955185108361 | 5.55642941544957 | 5.6268771354987 | 9.18202183671591 | 9.0109280608945 | 8.89948381407922 |
| CKS2 | 8.52853225056012 | 9.20840508137897 | 8.67990228993158 | 9.81674368727774 | 8.49265437101891 | 11.0479077725196 | 10.6161536566219 | 9.73694474256376 |
| CP | 8.6412479655949 | 6.99870324606075 | 5.01547080763938 | 4.7899900186681 | 5.15835722604901 | 11.6480631702729 | 11.2482418823034 | 9.41770064425668 |
| PSAT1 | 8.85134303114069 | 8.47163457452272 | 8.66174247523243 | 8.87946072253802 | 9.69925143310924 | 8.778453364259 | 10.1177054307015 | 9.30288220813803 |
| MECOM | 7.26931372634803 | 7.98621750102552 | 4.68077442549246 | 4.8585778489074 | 4.81383248612881 | 9.21191680756252 | 9.20760738759239 | 7.7247844950578 |
| ESRP1 | 8.38814647613138 | 9.38301301548867 | 5.09740010731741 | 4.95349806319688 | 5.02303351866553 | 10.2911822132028 | 10.2443388583207 | 9.20670548691683 |
| WFDC2 | 9.86435125567787 | 10.5449708708256 | 5.80984315011684 | 6.21049276482902 | 5.61412086878925 | 10.9732235644225 | 10.735044009018 | 10.1485765720971 |
| CEP55 | 8.11914863981125 | 7.97372606209238 | 7.2184905850094 | 8.38956681176272 | 7.3518226445507 | 9.78341081637131 | 9.15351656554685 | 8.55392490572603 |
| MUC1 | 10.0130574220878 | 8.07394516257434 | 6.19350894004952 | 5.89627184880738 | 5.99751823451979 | 11.6525810521616 | 11.5136940445148 | 10.8160092352127 |
| MCM2 | 7.07307041961431 | 8.38620739856046 | 7.26162483557912 | 8.10234318974905 | 7.64817779572482 | 10.9373076062537 | 9.93186326450837 | 9.5475597206369 |
| FAM83D | 7.5168818908212 | 9.33078245927132 | 6.97853886971045 | 8.3151495622563 | 6.44592529857927 | 9.04154143167939 | 9.47680087345255 | 8.99606668035835 |
| ZWINT | 8.55197736018086 | 9.44037088472281 | 8.01625115501275 | 8.83964471919328 | 8.04116630635076 | 10.4358681622056 | 10.1877232162907 | 8.41096855135023 |
| NEK2 | 6.68334556167658 | 8.46481118996914 | 5.94719858426206 | 7.1853710292354 | 5.85996954822103 | 8.19539361696133 | 8.40310663739983 | 7.28738086785133 |
| BUB1B | 7.07713616033198 | 8.28969616339521 | 7.03738222200308 | 8.05972300029794 | 7.05549936581374 | 9.83043281017897 | 9.43836979215388 | 8.3635303041165 |
| DLGAP5 | 6.73687542290827 | 6.77360079528254 | 6.50318969917099 | 8.03364324351038 | 6.16691625156997 | 8.48330792371173 | 8.78911300137012 | 8.82803807919617 |
| MELK | 7.65999589242998 | 8.42256941086083 | 7.80799883862303 | 8.71901226776101 | 7.6235888986134 | 10.3379006028609 | 10.0726417796228 | 9.28343566957045 |
| FZD10 | 7.23150921086705 | 7.83851062398525 | 4.65878273401283 | 4.60999129521268 | 4.30888505741176 | 9.51581611639505 | 6.77171394462834 | 9.05142648455613 |
| LPAR3 | 6.78227750019497 | 9.18164922381533 | 5.15724586737157 | 4.95326523901484 | 4.98116766710568 | 9.19004934487526 | 9.35800717346864 | 8.49529942237838 |
| ITLN1 | 6.02170180007169 | 6.32984117653063 | 5.83466065790173 | 5.54070926267143 | 5.76606505147495 | 6.74554660160653 | 6.90107203033511 | 6.88581837198992 |
| LINC01105 | 5.32720842201417 | 5.31203585372293 | 5.9371874246062 | 6.55581615506164 | 7.41303549858812 | 4.83264868425296 | 4.89818561367529 | 5.08705827830139 |
| ANXA8L1 | 7.34890516116841 | 7.16269343221124 | 11.223561319634 | 12.1893705572921 | 11.7740704748833 | 7.97171597731702 | 8.57407122450033 | 8.97773784924281 |
| DFNA5 | 6.67299099382775 | 6.50207595604579 | 10.3290675203012 | 10.5984805912988 | 10.8035822408562 | 7.42010338718182 | 8.22786619741159 | 7.53248840166785 |
| PRG4 | 4.5795422249369 | 4.21645486514476 | 4.33771109212829 | 3.82374936030827 | 3.92884403671257 | 5.8023043880827 | 5.3395935009654 | 6.12638854223735 |
| ABCA8 | 5.36573907273931 | 5.38404980679516 | 7.17612327114794 | 6.18870421713764 | 5.39768890368764 | 5.04193945072894 | 5.04429487601344 | 5.30125473484662 |
| PROCR | 5.39163026151743 | 4.88264304936184 | 8.84871682208447 | 9.86602703735862 | 8.04504974083799 | 5.58600206876381 | 6.14603400948227 | 5.86998734999146 |
| CHGB | 5.59693514238723 | 5.49024921062709 | 6.50143914515887 | 5.55581615506164 | 5.4154882710497 | 4.96071093803352 | 5.74392959980903 | 4.90114686887069 |
| AOX1 | 6.19002217480265 | 6.10821079332637 | 8.65151815893153 | 8.10925607307133 | 8.08656087495595 | 7.27870033989069 | 8.188413288586 | 7.93307361599708 |
| CALB2 | 7.8312438968552 | 7.82648493104337 | 9.16658992664437 | 8.96737037701611 | 7.35790383855249 | 8.19967725195401 | 8.13017412112174 | 8.44605768021277 |
| HAND2-AS1 | 5.56056211851471 | 5.13216552547809 | 5.82705683650015 | 6.1673177809466 | 5.71685374957467 | 4.72708181449589 | 4.59200247935216 | 4.80747857633314 |
| BNC1 | 3.81044310384517 | 3.69320814891002 | 7.36238221623699 | 8.79056028284966 | 9.13220409144681 | 5.3754408966329 | 5.2300773255391 | 5.61192481725354 |
| BCHE | 4.26228280642066 | 3.60288440871842 | 8.76808505335419 | 8.2740286490558 | 8.24217374916495 | 5.18992732253797 | 5.0573506231391 | 5.3189277782808 |
| CLEC4M | 6.55987415626001 | 5.97407036702403 | 5.73782194014417 | 5.74146698640115 | 5.90424322720366 | 6.07300720322195 | 6.02760084258979 | 5.96919079083302 |
| NPY1R | 3.61470984411521 | 3.52857131887076 | 4.51727569320958 | 5.95535930524299 | 6.58646452588639 | 4.92041240816079 | 5.05942882965129 | 5.37557121848437 |
| TCEAL2 | 5.39540560456633 | 5.43496176018725 | 7.57326847767598 | 8.28331990667844 | 8.85689234469202 | 5.9642576829775 | 6.60352101327696 | 6.38420871560035 |
| MNDA | 6.62746092712665 | 5.86814347966673 | 5.00988458893184 | 4.94719858426206 | 4.86443379636562 | 7.48246917094611 | 7.40087943628218 | 6.73560340783854 |
| PDE8B | 5.45855688358022 | 5.54184521274354 | 4.965476461494 | 4.86558892608984 | 5.2137360959228 | 5.21709497239813 | 5.35450963872955 | 5.54215485932614 |
| REEP1 | 6.3539407510657 | 6.13051908302734 | 5.75314987879766 | 6.13903966768306 | 7.69324300293045 | 8.01121327575241 | 7.89498748215302 | 8.25265313401387 |
| ADH1C | 4.43629511983936 | 4.79129314859221 | 3.83187724119167 | 4.30888505741176 | 4.10013667128545 | 4.80426527917253 | 4.91787089418693 | 5.39880182603374 |
| SPOCK1 | 6.1673177809466 | 5.98481717429359 | 11.0754323513922 | 9.65740777777802 | 10.110444158809 | 5.85815012876955 | 7.34586648054215 | 5.97973499493899 |
| KDR | 7.04187813995592 | 6.72887286326344 | 5.95930648975966 | 6.89384755813292 | 5.64212391615349 | 7.15534447015786 | 7.26761070240877 | 6.82645950776036 |
| GADL1 | 4.38612115681485 | 4.53729606709084 | 4.62058641045188 | 4.55151601762801 | 4.53667461756976 | 5.21564365470102 | 4.91891092888435 | 5.15388638408562 |
| SFRP1 | 6.9560566524124 | 5.74893078387584 | 6.0393577651597 | 5.4154882710497 | 5.33655119005699 | 6.01122222275736 | 6.25998480663264 | 6.56937526278828 |
| BAMBI | 5.84172158112846 | 5.49185309632967 | 10.8139975792445 | 10.1250517827037 | 10.4962046682165 | 5.77842938016979 | 6.35151349403489 | 6.26196889776491 |
| LGALS2 | 6.24126817732937 | 6.15987133677839 | 6.27202318906105 | 6.39626226099011 | 6.30888505741176 | 5.29897350413388 | 5.37304609283747 | 5.22005129588012 |
| DIRAS3 | 4.73498052343589 | 5.50747752951693 | 9.20813679324603 | 8.75592239816572 | 5.87946072253802 | 5.71547883810873 | 5.6998986060359 | 5.2942935783992 |
| C21orf62 | 6.53760669149529 | 6.65942512142569 | 6.06695024392463 | 5.91814767387683 | 6.03782146543497 | 7.87679379466551 | 7.25604164237458 | 8.0214075464348 |
| TCEAL7 | 5.76101926524048 | 5.1407786557828 | 8.71424551766612 | 8.25365842165248 | 8.67454539384586 | 3.93083193741479 | 3.83157327060919 | 4.62015823009683 |
| OGN | 6.32264926213102 | 6.60718233743881 | 5.0389189892923 | 5.07873790918186 | 4.79441586635011 | 4.44574656410316 | 4.81394019950747 | 5.12087029502508 |
| SYT4 | 6.06069593168755 | 5.89506021268939 | 5.47378691161437 | 5.77135740899056 | 5.72000478695481 | 6.63880079547321 | 6.39001586329837 | 6.47647566059866 |
| LOC100506718 | 6.85091603492844 | 6.15926588316068 | 7.4893663128583 | 7.23070898827322 | 7.30967340183972 | 5.60832925979446 | 6.68391396488501 | 6.45046841914603 |
| GPRASP1 | 6.1622906135458 | 6.30852106219326 | 5.67327373660982 | 6.19515071056471 | 6.91528186586766 | 7.03171498528771 | 6.8158571777241 | 6.48173001921357 |
| NELL2 | 6.71657942079634 | 6.74227574754027 | 5.63372181264101 | 5.6435676219088 | 5.78293270482084 | 7.90736540458479 | 7.78411786900412 | 8.02160187160431 |
| AADACL2 | 4.89675621847481 | 4.87676249078156 | 4.20633064787105 | 3.9136075118231 | 4.46074256378964 | 4.85547150935393 | 4.65989602380372 | 4.67386166415869 |
| GHR | 5.26153081524341 | 4.59872249967662 | 7.3547342399706 | 6.93251005337989 | 6.71121955689433 | 4.51548538898516 | 5.2504841322107 | 5.13470559073449 |
| ADH1B | 6.68943894979436 | 6.12887075946512 | 5.41709300181709 | 5.25370568980906 | 5.46344263185974 | 6.24087622213291 | 5.95534884246906 | 5.95912388059081 |
| MGARP | 4.63807383718072 | 6.54303182025524 | 11.1984941536391 | 10.4674425244835 | 9.9530760416966 | 5.19676833115403 | 5.72882933829152 | 5.43705791390897 |
| IGFBP6 | 7.01390884549064 | 5.71644223684332 | 10.1680578078918 | 10.3552519765667 | 8.8820316083521 | 6.58774901836693 | 6.61233332953748 | 7.01703108052784 |
| GFPT2 | 7.35138098067433 | 7.21994291395413 | 7.21091481607392 | 7.10318288132074 | 6.757690018734 | 5.90726805142923 | 6.51746468018113 | 6.70991092740223 |
| OLFML1 | 6.6748278321868 | 6.28835856219366 | 6.3116120981851 | 7.32165756420415 | 5.5270077606372 | 6.63557302742459 | 6.36991485691213 | 7.27820782722303 |
| NAP1L3 | 5.47800105583793 | 4.94485844580754 | 8.00168966840421 | 8.05300269569435 | 8.29324171895624 | 5.22364264454092 | 5.39642668083092 | 6.12395583194017 |
| HBB | 8.04742387422585 | 9.31341025921778 | 6.22351908679073 | 7.60845813430665 | 6.45372333460197 | 7.54239348956378 | 7.393828026453 | 7.62873714832249 |
| DAPK1-IT1 | 6.60184505651104 | 5.84874811461196 | 5.26453643099903 | 5.11186596386756 | 4.8923910259134 | 5.65915678102656 | 5.71559415048004 | 5.82783426427318 |
| ALDH1A1 | 6.98811658476014 | 6.74227574754027 | 5.30158764660319 | 5.43796008833447 | 4.93310047493137 | 6.5490453259045 | 7.20533385929953 | 7.41252750737129 |
| LRRN4 | 5.91420571850783 | 5.21315283533637 | 8.18920683459702 | 9.79472451808085 | 8.57878779567697 | 6.52127142848421 | 7.16192294334712 | 7.88123940696368 |
| HAS1 | 5.5298209465287 | 5.74658149978581 | 5.83364912759498 | 6.62804448261682 | 6.15724586737157 | 5.86186854185148 | 5.98103976698926 | 6.02779544098985 |
| LXN | 7.77511640443559 | 6.53294028837287 | 10.9838486740224 | 10.8929677457641 | 11.0200562629107 | 10.0654699906957 | 10.3321372760738 | 10.1381053749964 |
| CLDN15 | 7.40913632042844 | 7.59652522761224 | 6.87233628810464 | 6.84172158112846 | 6.93793283896709 | 9.04155512054012 | 9.26321684450092 | 9.29270238961707 |
| PDGFD | 7.05587891538978 | 6.52505092687154 | 8.16879745543659 | 7.02972894155423 | 6.69501944235684 | 6.46083182860264 | 7.17362217544546 | 7.55592464447106 |
| PRSS35 | 4.48864353985378 | 4.47378691161437 | 5.66732447027863 | 4.32337006906127 | 4.26303440583379 | 4.17855530658575 | 3.93820109105871 | 3.98078393273496 |
| HBA2 | 7.83384940368058 | 9.90099004599721 | 5.73989310522784 | 5.34760659387803 | 5.42312993143558 | 8.80082280424849 | 9.11478604951129 | 9.1848955875951 |
| WNT2B | 5.24536255269789 | 7.3076789713418 | 8.0805377535217 | 8.57534069715774 | 9.26163071164666 | 7.80034972711062 | 7.52126985784489 | 7.78911773021623 |
| CHRDL1 | 5.53449743373817 | 5.96347412397489 | 5.27761287075669 | 5.58586390346269 | 7.91462431565015 | 8.03058437889972 | 6.15256473348939 | 8.00141945440772 |
| LOC101930363 | 5.82553125118962 | 5.99729240763651 | 5.14812063112396 | 5.82908844400489 | 5.74038793246835 | 6.96239863795633 | 8.01166335312184 | 6.995959309016 |
| PAPSS2 | 7.61586258260659 | 6.66249036391378 | 10.6938237796291 | 9.58580758228836 | 8.78788079803311 | 6.5425882374439 | 7.27679812613981 | 7.54443953623131 |
| FLNC | 6.69292928642903 | 6.24906603385587 | 9.66042382254214 | 9.57995699292977 | 8.43049436830706 | 6.89497536004048 | 7.30776547899976 | 7.34418936650199 |
| PLPP1 | 8.030639550992 | 7.72280753116955 | 8.41157454145984 | 7.72495716645665 | 7.92359490152697 | 9.42510572965321 | 9.54816975537922 | 9.63029261089702 |
| AQP9 | 6.41818994794577 | 5.75702324650746 | 6.14139191617073 | 6.22920335788675 | 6.10789706166461 | 8.62431660996664 | 7.46616213321333 | 8.21063238440616 |
| TMEM255A | 4.19219416528334 | 3.66562016406638 | 3.5957423394744 | 5.02901108665907 | 3.44890095114513 | 7.58762752074251 | 4.0429594548209 | 5.44348399066272 |
| HOXC6 | 7.06565847093199 | 6.70846316507212 | 9.0007605956829 | 8.80374366850523 | 8.74096128035838 | 9.18173369117448 | 8.82562982731895 | 8.51826366394945 |
| LOC101926921 | 8.21460243440065 | 6.74238803513541 | 10.6790636521056 | 10.3636310468476 | 9.24283271240536 | 8.01019173900777 | 8.88638248159128 | 8.88975607610615 |
| PCOLCE2 | 6.39420543035888 | 6.32732808262995 | 6.25814199589377 | 5.98322165074267 | 5.77505054148317 | 5.68875944691476 | 5.5984515595675 | 4.74957717246 |
| RNASE4 | 6.14761197722422 | 5.30213623462205 | 7.61150438601266 | 7.00388328299455 | 7.52148266389274 | 5.91617804254471 | 6.85727813196113 | 6.76106781538151 |
| TCF21 | 6.33708664535482 | 6.69306872440728 | 6.43011797489203 | 5.97659276223859 | 5.13237119873254 | 6.18568917011372 | 6.73475296815799 | 7.19225335560525 |
| LOC101928635 | 6.50676377553112 | 6.13596574242734 | 8.08382500085706 | 8.98340693598614 | 9.16279411930629 | 7.90074547162188 | 7.93927712759778 | 8.20754882388212 |
| PKD2 | 7.29664094468348 | 7.27052894238072 | 9.26502894245816 | 8.67860013909946 | 10.8562698896976 | 5.50098046720644 | 6.56150180336313 | 5.14596270567424 |
| WNT5A | 7.93802108529191 | 6.27510019370779 | 8.59445524309763 | 8.82486329999302 | 8.43051527617331 | 6.0385612882345 | 8.4497738841173 | 7.21323547825737 |
| FGF13 | 6.66618848987278 | 5.99322146736894 | 6.51443791382931 | 6.41616416473313 | 4.71259578044703 | 8.85873013142443 | 5.72386432362673 | 6.05457501609951 |
| LHX2 | 5.48687523549849 | 5.40701277351601 | 5.71094415457587 | 6.03540396994207 | 5.31379002544369 | 6.21747986985655 | 6.22669829492059 | 6.59751627642898 |
| ATP10D | 6.23457795978457 | 5.51538446063695 | 9.43026436177798 | 8.7832601955813 | 9.03124630479371 | 7.06732679327654 | 6.09481455227318 | 6.38650403080092 |
| ARHGAP18 | 7.21299074423658 | 6.80029595065836 | 7.85650852711388 | 7.22599466122891 | 7.23639694577668 | 8.59211887252913 | 8.08979313842521 | 7.84311580591244 |
| LOC286191 | 7.18665901720211 | 7.44310931333536 | 5.40258575823259 | 6.26734852020245 | 5.15583017155653 | 7.09045121467934 | 7.92623075324244 | 7.78922061954733 |
| EFEMP1 | 6.18063861073927 | 5.36585582485594 | 7.56889348836283 | 7.78975098161058 | 7.31747291625277 | 7.04422798127288 | 6.50033090179049 | 8.34321829177827 |
| LOC100996760 | 4.98230913012977 | 4.38887833881199 | 7.27900691380736 | 8.319672120947 | 8.05793758684514 | 5.66323644164912 | 5.14106896485954 | 7.17070624968716 |

| **Gene** | **GSM461351** | **GSM461352** | **GSM461353** | **GSM461354** | **GSM461355** | **GSM461356** | **GSM461357** | **GSM461358** |
| --- | --- | --- | --- | --- | --- | --- | --- | --- |
| CD24 | 11.9554457048742 | 11.8424768487069 | 12.380348231751 | 12.6603942577678 | 10.925404599497 | 11.5042160837277 | 12.49155262881 | 11.443813220725 |
| CLDN3 | 10.4367818015485 | 8.80272314197658 | 9.84978351440453 | 9.34607598278067 | 9.29264487992482 | 9.55996972619327 | 9.08786589091186 | 9.48879515142443 |
| C1orf106 | 10.2018911123144 | 9.95712381244994 | 9.05409959164212 | 10.2105739433642 | 9.05375215050171 | 10.0613576905373 | 9.45293513238993 | 10.2757636864223 |
| CRABP2 | 11.0652612874217 | 10.6872881916978 | 10.6393859334933 | 11.6290696919669 | 11.3351279211247 | 9.72496398559796 | 11.0541498008245 | 10.3044540009303 |
| SOX17 | 10.6676393689695 | 9.74239112753582 | 10.1441164932547 | 9.42269974871948 | 9.7588294856982 | 9.64126512849709 | 11.2045008417186 | 10.2432156448569 |
| ELF3 | 8.4456936014871 | 8.96719647357776 | 9.04103394049852 | 10.0740620547927 | 8.41774986474748 | 9.27291277503286 | 8.80046637933104 | 8.62846862671858 |
| EPCAM | 12.3109705710992 | 12.6890086176547 | 11.9988971284932 | 13.3437409184722 | 11.807902269458 | 11.7921029393179 | 13.4389607461098 | 12.2368692676006 |
| SCGB2A1 | 12.5415661410146 | 8.24443519502296 | 10.7988767681333 | 8.62965532903594 | 8.96052039795644 | 8.22288665294061 | 8.58143410634656 | 9.26384663236723 |
| KLK6 | 10.5792122106783 | 9.70744023825426 | 10.2912628077967 | 8.82825392653483 | 9.8104768443138 | 8.41584737899552 | 8.5355086777087 | 8.23552603338712 |
| MMP7 | 10.102631888855 | 7.91486345949735 | 8.78527263093956 | 12.0567359234047 | 8.83998162569692 | 8.3357967533269 | 9.38309512196415 | 7.56366152116936 |
| CLDN4 | 9.06607169498272 | 8.64966395521805 | 9.12041285669475 | 8.94643553119707 | 9.0813795762904 | 8.94414541199773 | 8.62670195193487 | 8.8734810253491 |
| CKS2 | 10.2327326979008 | 10.4772624445271 | 10.5333394670573 | 10.4540524821958 | 10.5155815797454 | 10.0013237414796 | 10.9747300552221 | 10.2770548761487 |
| CP | 11.1264697577219 | 9.94163307788447 | 9.2860257491422 | 9.47490242627668 | 10.4528756910683 | 10.6838433652475 | 10.8420798127306 | 10.5734154762284 |
| PSAT1 | 9.79217616430874 | 9.73687626828998 | 8.76689160722128 | 9.83589723815953 | 10.3278411542394 | 10.0245163828218 | 12.0205388358545 | 10.7464626754265 |
| MECOM | 9.32698066211391 | 9.30499014179886 | 8.9638028545245 | 8.43333422552281 | 9.18399294689801 | 9.22768289061157 | 10.9889315851725 | 9.27478910845101 |
| ESRP1 | 10.2212711195295 | 9.57334328074341 | 9.98672094484301 | 11.0613803065211 | 10.4469230326949 | 9.93259198880875 | 10.8147266481002 | 9.09012565533789 |
| WFDC2 | 10.6422356446796 | 11.040639506135 | 9.70737397312578 | 9.47756589360545 | 9.97018691659178 | 10.2919139241117 | 11.0944572064378 | 10.8656475779427 |
| CEP55 | 8.81028563789055 | 10.0966361005396 | 9.38053898799801 | 9.97421380316426 | 9.77357771936158 | 9.47475238905792 | 11.318051283269 | 8.30859841886172 |
| MUC1 | 12.3325196975392 | 11.4235105919137 | 11.3019632993353 | 11.7263555524594 | 11.5219627035426 | 11.095572623302 | 12.0130676606473 | 11.0427314207782 |
| MCM2 | 10.3562648809312 | 9.52775261658999 | 10.4661478549304 | 11.2277783728277 | 10.7454138255507 | 9.73092181088806 | 10.8724671172254 | 9.75581894196564 |
| FAM83D | 8.3785506379166 | 9.53322264570372 | 9.62972453326219 | 9.84808613298117 | 10.0381370890689 | 9.30082842247186 | 10.4036937862628 | 9.89742801214669 |
| ZWINT | 9.45926356766631 | 10.3112033705403 | 10.2574821334048 | 9.99112497949876 | 10.1404463641957 | 9.43133253629492 | 11.3128716132976 | 10.1797971524365 |
| NEK2 | 6.91100601904021 | 8.2482881421271 | 7.9350816390829 | 7.73216199752368 | 8.38561826477134 | 7.74885700743019 | 9.26786850746264 | 8.07121804908633 |
| BUB1B | 9.13173608804646 | 10.1890091069524 | 9.59240284174732 | 9.72493841365185 | 9.89210409780068 | 9.09059411996732 | 10.7985204031479 | 9.27591962112212 |
| DLGAP5 | 7.76163101060958 | 10.4271032871528 | 9.14018814635299 | 8.96586795854794 | 10.2118639655881 | 8.31617742764221 | 9.18420589609841 | 9.01382791209206 |
| MELK | 9.11941065061543 | 10.5227090241633 | 9.31682682398352 | 10.6202564881939 | 10.3573980502867 | 9.50539475925091 | 12.051457074 | 9.75528151783235 |
| FZD10 | 9.29877514494075 | 6.76101926524048 | 9.42275230097654 | 9.69244986556558 | 6.5672062113705 | 5.95669559134382 | 6.42472393911165 | 8.42832248206575 |
| LPAR3 | 11.0312101135705 | 9.2762768109742 | 10.5962754951624 | 8.19974349640864 | 8.42643879026324 | 9.4663854679601 | 9.21033650228458 | 8.44621279948263 |
| ITLN1 | 6.93293518125174 | 7.03838130692698 | 6.98859380548196 | 6.80698131872128 | 7.16675560852319 | 6.9841677812222 | 7.061527808047 | 6.97364571245031 |
| LINC01105 | 4.77789660718644 | 5.02421771521268 | 4.86482004816803 | 4.95724448107176 | 4.98900272621119 | 5.1313658772537 | 4.93133477339923 | 5.07941651420222 |
| ANXA8L1 | 8.1992846297899 | 8.17075631527692 | 8.21914915529809 | 8.03379188783735 | 8.37879770628339 | 8.46061971327304 | 7.74606414349248 | 8.151975479096 |
| DFNA5 | 7.73448608677632 | 7.83195322383124 | 7.69416284465391 | 7.62911615086647 | 7.03493098582503 | 6.79042018168104 | 7.13158948432813 | 8.89605988593014 |
| PRG4 | 6.01013307645338 | 5.49815191823579 | 5.34501663147508 | 5.60753153717801 | 5.23557389936858 | 5.44852437444992 | 5.54727090017241 | 5.76246309978135 |
| ABCA8 | 5.51172315134029 | 5.11311424353717 | 5.21232159267907 | 5.14753871628878 | 5.23613159331057 | 5.28943859170036 | 5.16396692838487 | 5.28076457255917 |
| PROCR | 5.87476992125961 | 5.98607639146509 | 6.90212182917416 | 5.7845589466791 | 5.38639021401305 | 5.2933851995014 | 5.80617194249567 | 4.8630662282726 |
| CHGB | 5.08418335026598 | 5.12817377643649 | 5.61118418601076 | 5.07828959873117 | 4.94533145981153 | 5.17835611359927 | 5.11778645478202 | 5.26425492037192 |
| AOX1 | 7.34699189291869 | 7.36937923530375 | 7.8396670771088 | 7.37825886938091 | 7.49521346444045 | 7.7231895813478 | 6.98157470227386 | 7.58495761658905 |
| CALB2 | 7.92544169014846 | 8.29792505250381 | 8.03660223540196 | 7.83240270591662 | 8.7724828372869 | 8.45691700780724 | 7.87310570085681 | 8.23402702482282 |
| HAND2-AS1 | 5.21692818392938 | 4.86806443925247 | 4.89384027912848 | 4.85677409890693 | 4.55379668674322 | 4.88381629017539 | 4.72017994703374 | 4.75597712683241 |
| BNC1 | 5.57056918621751 | 5.74375729978267 | 6.01808442467355 | 5.9456006807001 | 6.08856989699556 | 5.57030095269842 | 5.39837038103322 | 5.55128221441294 |
| BCHE | 5.93457547254568 | 5.40040813583924 | 5.01665676889967 | 4.79272523330573 | 5.30869579135941 | 5.37437876911687 | 5.47425431583264 | 5.39747783977339 |
| CLEC4M | 6.09659709899573 | 5.9268664360001 | 6.04377318970702 | 5.85630350912776 | 6.25041686091292 | 5.87928671621009 | 5.78640425111955 | 6.10330459603846 |
| NPY1R | 5.72528581240898 | 5.2610041881009 | 4.55873906601247 | 4.92193612206081 | 5.50238152545689 | 5.28156102065076 | 5.31407654107219 | 5.795863034222 |
| TCEAL2 | 6.88259414361629 | 6.93219112524406 | 6.54576609352769 | 6.73961861386697 | 6.75232042845967 | 6.29351395194501 | 7.00669073900793 | 7.51116755194132 |
| MNDA | 6.48456675036761 | 6.82158267270679 | 7.43687807740704 | 6.97129062906508 | 5.75694321312777 | 6.62187165441027 | 6.35116539960175 | 5.59663107130802 |
| PDE8B | 5.52146956662629 | 5.27747276000335 | 5.38050781933945 | 5.521032923026 | 5.24944154850714 | 5.41534402813764 | 5.57300989810031 | 5.59046728815752 |
| REEP1 | 7.51421617435125 | 7.9480701927373 | 8.30185122346594 | 7.89575187864989 | 7.91966365132896 | 8.16814307474193 | 7.26316213880244 | 8.13813226036344 |
| ADH1C | 5.11358382548578 | 4.74491454545408 | 5.07685834293729 | 4.97814528094317 | 4.73813550603676 | 4.50447420884814 | 5.03305291931592 | 5.64564690521127 |
| SPOCK1 | 6.18217582194287 | 5.79370864249168 | 7.21246233889155 | 8.11656229855909 | 6.220931597327 | 6.21576594767286 | 6.70980067281608 | 7.24339298985863 |
| KDR | 8.55288423705763 | 6.97387527098482 | 7.25434838303253 | 8.74010117305441 | 7.42805862002151 | 8.28387548386482 | 7.27800333861092 | 7.81114345841227 |
| GADL1 | 5.78829679864476 | 5.48812934755006 | 4.84556532002646 | 4.87782766867908 | 5.68601300999196 | 5.08274516114786 | 5.08824338267442 | 5.30328028360898 |
| SFRP1 | 6.15727315642698 | 6.58988098575692 | 6.94860960735407 | 6.53480554928913 | 6.12002579984236 | 6.34988848169328 | 6.09167074725003 | 6.57608105386288 |
| BAMBI | 7.09267258488649 | 6.47101345488782 | 6.25592554806313 | 7.91739595013836 | 6.93065455760372 | 6.59487097019263 | 6.1548181090521 | 7.06154940883517 |
| LGALS2 | 5.02723368777095 | 5.40467155318663 | 5.12600231085232 | 5.14492738485672 | 5.24014256970009 | 4.93875155755557 | 5.14521686038035 | 4.77829269610546 |
| DIRAS3 | 5.94842563910846 | 5.36255404935075 | 5.38322043336566 | 5.43455150424189 | 5.74080885950851 | 5.81144534128686 | 5.35275499455707 | 6.524080919291 |
| C21orf62 | 7.64664870703807 | 7.50908970987287 | 7.48356590341273 | 7.32154347522566 | 7.56971095191829 | 7.76472134363607 | 7.40649075193612 | 7.65033842159237 |
| TCEAL7 | 4.23415639367099 | 4.13393335798797 | 5.25377375323392 | 5.44031440180312 | 4.3455595990675 | 4.58633241040588 | 5.36092256313203 | 4.0731861305806 |
| OGN | 5.8582396620827 | 4.58261922490896 | 5.24712621555311 | 4.4814733255553 | 4.4028176622001 | 5.01352702330056 | 6.1758419271621 | 4.75309370528198 |
| SYT4 | 6.58483175055837 | 6.96709942292744 | 6.46370582265283 | 6.34384838109539 | 6.63279458680736 | 6.548247027313 | 6.56676797650296 | 6.75954202800836 |
| LOC100506718 | 7.12454182458293 | 6.01765322555584 | 5.84854865693456 | 6.21555823758786 | 5.99786368124954 | 5.80035636084627 | 6.00029227393283 | 5.88111804856024 |
| GPRASP1 | 6.5997239408823 | 7.14547367031771 | 6.9844868178548 | 6.44761556099766 | 6.93664971605688 | 6.72226108164229 | 6.48032490992458 | 6.78044134262235 |
| NELL2 | 8.20800994875928 | 7.68739668066549 | 7.85101814063212 | 7.15847841340201 | 7.93362574696677 | 7.36116301625511 | 7.91190126068106 | 8.63274442986451 |
| AADACL2 | 4.96030318632426 | 4.19617423361198 | 4.37526885376128 | 5.00482045772247 | 4.73401587611912 | 4.97753180064541 | 4.53284680618394 | 4.70306192886942 |
| GHR | 5.43561192696135 | 4.27359794344647 | 4.57725357904162 | 5.57032630570837 | 5.28066314384948 | 4.55848806297701 | 5.05362835437865 | 5.14306274958125 |
| ADH1B | 6.28939969190634 | 6.23194546703012 | 6.20531821791275 | 6.13876123496281 | 6.20680925250159 | 6.21774448788079 | 6.08924654285073 | 6.16546529741976 |
| MGARP | 7.73688218594811 | 5.22593812094359 | 5.7301263628845 | 5.57670956726323 | 5.59938623676516 | 5.24736551224137 | 6.10282607211719 | 6.43044418819178 |
| IGFBP6 | 7.52175745921027 | 7.88097320307306 | 7.44901654707812 | 7.06293118700051 | 7.4925101744141 | 6.40412653838424 | 7.98502787940397 | 7.77144985261686 |
| GFPT2 | 6.13705466101276 | 6.28220254890407 | 6.44945077475868 | 7.03336793579035 | 6.54682348063158 | 6.58207873884617 | 6.59789165396777 | 6.28378475420857 |
| OLFML1 | 6.8093244016143 | 7.076890401521 | 7.37011195747919 | 7.5929951443784 | 7.12440051610853 | 6.62920359885431 | 7.23267034914563 | 7.29071928277095 |
| NAP1L3 | 6.66434061183981 | 5.81769487889167 | 6.30226055224471 | 6.26560754585711 | 6.46823465615886 | 5.31972991790044 | 6.6538768924879 | 9.07175462618418 |
| HBB | 7.52581049353214 | 7.45028274808886 | 7.89602203213908 | 7.5718512211371 | 7.47855122724326 | 8.12272836130625 | 7.6286660742597 | 7.47503825732752 |
| DAPK1-IT1 | 5.30333508746396 | 5.45236151149223 | 5.50215872081881 | 6.08868225171709 | 5.21924210571511 | 5.64418508675122 | 5.49124062244478 | 5.36384740093543 |
| ALDH1A1 | 6.85414529657655 | 6.65939657694702 | 7.21427054439237 | 6.85755807425347 | 6.36861820602429 | 6.29630688935 | 6.58964815064916 | 7.14148388274902 |
| LRRN4 | 6.44202618088082 | 7.23858625906929 | 7.55647923140721 | 6.61523162259718 | 7.38614271773458 | 7.04651288729594 | 6.46208586564816 | 6.70086067397568 |
| HAS1 | 5.71808758396052 | 5.86355196248822 | 6.13529475630134 | 5.74099499961002 | 5.93401633093562 | 6.14337505017516 | 5.88663549694035 | 5.76776866284583 |
| LXN | 9.01431344439361 | 9.72655367040244 | 9.77353651144178 | 9.41141353395429 | 10.182841246501 | 9.80833999791264 | 9.22120283472605 | 9.97138548109354 |
| CLDN15 | 8.65462707877911 | 9.12702833314043 | 9.43709974765898 | 9.92270703772886 | 9.25067976963724 | 9.19342063502781 | 9.17450379476164 | 9.35956509436926 |
| PDGFD | 6.74520371188714 | 7.50364688041664 | 7.39615092441627 | 7.43116744944315 | 7.15381040171284 | 6.97751691821832 | 7.01929048312046 | 7.87992320774995 |
| PRSS35 | 5.86949390750951 | 4.10750375495126 | 3.55049438785374 | 3.40962174887972 | 4.82167450431942 | 3.62614706360372 | 3.72918294068567 | 4.14153088562518 |
| HBA2 | 7.95812153602718 | 8.99584439304809 | 9.3129884314905 | 8.81956653926603 | 9.0185623152014 | 9.40911899007431 | 8.31576546381748 | 8.89152551363545 |
| WNT2B | 7.59500379848005 | 7.86124450794176 | 7.78699487748559 | 7.33106562037014 | 7.79006823966561 | 7.71696826640603 | 7.19180616191942 | 7.65798774054086 |
| CHRDL1 | 6.71281585443737 | 6.31698200227265 | 7.34123859630109 | 7.58525551839274 | 6.51438425757953 | 7.25397981458137 | 6.47048805861612 | 9.19943432959313 |
| LOC101930363 | 9.10843297864897 | 6.27362032093047 | 6.56785418979655 | 7.82915822967609 | 6.57933102450809 | 8.67174626686322 | 6.52171349547664 | 8.26188805992657 |
| PAPSS2 | 6.91524361661058 | 6.94360647017401 | 7.25717692034698 | 7.33144934937025 | 7.27419952524303 | 7.04664420308468 | 6.87163997910372 | 6.79762045546967 |
| FLNC | 7.68152657055792 | 6.85701058078627 | 7.30361638115136 | 7.31191175821361 | 7.31090356332226 | 7.93033521897499 | 7.35393193207035 | 7.60687153777349 |
| PLPP1 | 8.49076866383959 | 9.59590920483198 | 9.74079773080683 | 9.80305101638574 | 9.69612165043093 | 9.43593377610745 | 9.31126355160194 | 9.72847411863483 |
| AQP9 | 7.21036938107269 | 7.36227700218787 | 9.13369195046029 | 8.49037357552875 | 7.33253787891772 | 7.4609964217119 | 6.80575676769212 | 7.1683612346213 |
| TMEM255A | 3.98915717721655 | 2.89514166653742 | 5.50905288241069 | 3.73169374361159 | 4.63592267653961 | 3.70941195818655 | 4.109552794487 | 4.22948025491412 |
| HOXC6 | 8.79461406083817 | 8.77015510249784 | 8.73666237092327 | 8.88841145176093 | 9.11149043045687 | 9.13985827614017 | 8.85716925084258 | 8.86434093195563 |
| LOC101926921 | 7.04480738136277 | 8.74461735983316 | 9.07162316046057 | 8.85968551762219 | 8.38292492733034 | 8.84101242664982 | 7.80780966643352 | 8.89203405134911 |
| PCOLCE2 | 5.53590986734863 | 5.52922126033451 | 5.07822554300729 | 5.09211862029557 | 5.53568907135084 | 5.3047994059755 | 7.0203910769749 | 6.06811400177508 |
| RNASE4 | 7.69366815419283 | 6.83845389581606 | 7.5671727397915 | 7.44263543927905 | 6.26672096215716 | 5.14604623263838 | 7.09171093988433 | 8.26587051331943 |
| TCF21 | 6.80896417491926 | 6.52705312769247 | 6.76347066745096 | 6.60245688018043 | 6.56833770235954 | 6.75595643697079 | 6.00211965465652 | 6.37931337934446 |
| LOC101928635 | 7.67950754563783 | 7.93587605376664 | 8.62469677543388 | 7.9815307502901 | 7.86003754554547 | 8.15783701470247 | 8.03251139286253 | 8.24401293091809 |
| PKD2 | 5.68627079822693 | 5.48899051608641 | 6.12513652911731 | 6.24238337950295 | 5.4910898691035 | 3.84157063739552 | 6.36109632524455 | 6.23654427894986 |
| WNT5A | 9.23164240536844 | 5.61030437687035 | 6.99264948508423 | 7.66575516171866 | 8.20767082892926 | 5.57326544759657 | 8.42057082459873 | 8.9301489054602 |
| FGF13 | 6.99546190592535 | 7.01019798956573 | 6.06394724466505 | 6.37232530852358 | 6.2940251696767 | 7.1947174628936 | 6.97463255509506 | 7.47393299170009 |
| LHX2 | 5.96537681004442 | 6.50289702712352 | 6.17379404607357 | 6.25224438787309 | 6.21978419715662 | 6.83496397874682 | 5.86093301031645 | 7.00306528602017 |
| ATP10D | 6.94007276077361 | 5.93831637707115 | 6.95769409267548 | 7.01584988622445 | 5.89956719361966 | 5.30905610344461 | 6.29451047499263 | 6.68404726161302 |
| ARHGAP18 | 7.960575031671 | 8.02317642225638 | 8.40688101064592 | 8.78255992987655 | 7.71157222229491 | 7.85992152589651 | 8.61846479324219 | 7.10218009646066 |
| LOC286191 | 6.55345112975564 | 7.49325503512067 | 7.28317171662102 | 7.26772305162742 | 7.79344724593845 | 7.43868375034077 | 6.9382740281779 | 8.52868851745522 |
| EFEMP1 | 5.22897130032337 | 5.74176177842837 | 7.02486669265972 | 9.89955999326141 | 6.48126611301528 | 6.87271960543191 | 5.78159839423202 | 8.63365824839276 |
| LOC100996760 | 5.31797330161652 | 5.38330339216737 | 5.07201144754108 | 7.05515226165498 | 6.62445041039183 | 4.99831737774906 | 4.27078307352729 | 5.40699237231062 |

| **Gene** | **GSM461359** | **GSM461360** | **GSM461361** | **GSM461362** | **GSM461363** | **GSM461364** | **GSM461365** | **GSM461366** |
| --- | --- | --- | --- | --- | --- | --- | --- | --- |
| CD24 | 12.486530699699 | 10.8561641756102 | 12.7313665543143 | 12.2254507784032 | 13.1028751604263 | 11.1933903451555 | 11.7922876218828 | 11.321428888455 |
| CLDN3 | 9.73290681880141 | 8.92700901106927 | 10.446797449212 | 8.52972921381405 | 9.81180093608361 | 9.23160760799168 | 8.87167734467031 | 10.2707362448193 |
| C1orf106 | 10.0221874648763 | 9.54097654714187 | 9.57618198216482 | 8.20564176457303 | 10.8909178264047 | 8.94824164740076 | 8.60493493218082 | 9.97793814605858 |
| CRABP2 | 9.43225375017311 | 9.00241561784028 | 11.3442737124368 | 9.79240476508806 | 11.4565032976614 | 9.89734783699976 | 10.0372586606887 | 10.7255792804196 |
| SOX17 | 10.9571746099102 | 9.15055079170736 | 10.5678230144009 | 9.58133712297056 | 11.1073511366713 | 9.64773092976816 | 10.0951398467337 | 10.9894619139258 |
| ELF3 | 9.15023809327637 | 9.24317636415587 | 9.48518394165539 | 8.10370394230256 | 9.2082034626276 | 8.55519496321222 | 8.56857445797495 | 8.14263127062534 |
| EPCAM | 12.4303114115513 | 12.4879128700001 | 13.1567862345415 | 12.2792536352699 | 13.1434597475057 | 11.2050356661654 | 11.5459490692245 | 13.0473880865687 |
| SCGB2A1 | 9.614247886929 | 10.3063693403996 | 9.11705343675223 | 12.7824638542904 | 8.09947405713443 | 8.43291766202398 | 9.3437475796113 | 12.5438245045466 |
| KLK6 | 8.97695356271038 | 9.48432143787677 | 9.21803522095555 | 9.04608174087718 | 8.71532370097361 | 9.76208300356767 | 8.74575162416986 | 9.13344793371866 |
| MMP7 | 10.6306311661695 | 9.7585447033184 | 7.81956600600848 | 12.0734386803853 | 9.44845912419823 | 8.39932492750618 | 9.46141191529944 | 9.65635156464171 |
| CLDN4 | 9.20517865990876 | 8.8582110617672 | 9.24184137500763 | 8.8480250839173 | 9.10567284040594 | 8.9804180908855 | 8.69471655739276 | 8.7249759190177 |
| CKS2 | 9.37200527977377 | 9.40989367018794 | 10.7911384634887 | 9.47809209132784 | 10.6195505677706 | 9.57770449996318 | 9.83776825406153 | 9.14946769728071 |
| CP | 10.9221969190545 | 11.1212477667868 | 11.695527045488 | 9.80011485703141 | 10.5687658197031 | 9.35620819909287 | 8.58409173684325 | 10.8952497872955 |
| PSAT1 | 9.50808394288768 | 9.89580397496372 | 11.3311867981305 | 10.9238771203205 | 10.8213399125611 | 9.60388500554811 | 9.98930082452351 | 9.62540474934168 |
| MECOM | 9.20202653048701 | 8.95223151165745 | 10.1683681800894 | 8.46617624817694 | 10.7777029497698 | 8.59973814652552 | 9.00507403075169 | 9.49278709926539 |
| ESRP1 | 9.94419520403675 | 9.52054502167929 | 10.9118919006698 | 9.86437266130132 | 10.4939454898108 | 9.75995890183369 | 9.72988835650365 | 10.5859056735803 |
| WFDC2 | 10.5585607665195 | 10.3151688131606 | 10.2715619273291 | 9.38393032650549 | 10.606465824975 | 9.32376696052753 | 9.40396767891549 | 10.8797609206563 |
| CEP55 | 9.25465072786256 | 6.868822554775 | 10.85672897625 | 9.13044958241292 | 10.0206188728299 | 9.51400781866193 | 9.42098339124702 | 8.47619534362664 |
| MUC1 | 11.3613045050655 | 11.3595519173272 | 11.6373731112159 | 11.2503465857048 | 11.0033396428763 | 10.7826354425985 | 11.4294240035341 | 10.9439620943868 |
| MCM2 | 9.59803760774883 | 9.69155859114742 | 10.3937122122773 | 9.0671439101521 | 11.6406968375701 | 10.1180845426787 | 9.16948160514922 | 10.729127866011 |
| FAM83D | 8.47053279794927 | 7.33635480664323 | 9.92000442258964 | 8.01695867662821 | 10.306619970471 | 9.33470457659357 | 8.77234096947281 | 8.83239004636606 |
| ZWINT | 9.19374464333777 | 8.45895610668857 | 11.5841545155641 | 9.55365425050095 | 11.2115476517945 | 10.0184505766649 | 9.19913736892669 | 9.91291028808049 |
| NEK2 | 7.34336207108309 | 7.19872888679875 | 9.12341452841608 | 6.66063916601814 | 8.99152241294986 | 7.67811945409237 | 7.4931949799631 | 8.61520715694886 |
| BUB1B | 8.33882550383913 | 7.79352527971919 | 10.4622977655389 | 8.77143994822594 | 10.3539297273131 | 9.04440231646608 | 9.06218108884924 | 9.44095219802964 |
| DLGAP5 | 7.01607282710771 | 6.23270104425416 | 9.60540173266343 | 7.75114902121642 | 9.01610626526898 | 8.98019385623348 | 8.41737575617838 | 8.13369708721128 |
| MELK | 8.77812313729964 | 7.48722906980423 | 10.5385672624457 | 9.01375255622557 | 10.0281132654505 | 9.31372428202842 | 8.70930097610374 | 10.2692435864904 |
| FZD10 | 9.50064671920209 | 8.59560062859737 | 8.41576711556448 | 8.62661800227142 | 8.58253342309444 | 8.3023921709935 | 8.71879656121244 | 10.3612200521736 |
| LPAR3 | 9.13459445370654 | 7.94048098411166 | 10.5183438330878 | 9.17940779077431 | 9.62296237060748 | 8.85286810117067 | 9.54673725928353 | 9.12497685032544 |
| ITLN1 | 6.9319666520627 | 6.59050770886214 | 6.90341191445641 | 6.74604398299834 | 6.9045081827595 | 6.77312601630473 | 6.96669577992576 | 7.04226128954695 |
| LINC01105 | 4.84119486985718 | 5.2035731388369 | 4.79788284747396 | 4.93887855846401 | 5.0185421780344 | 5.04661328771153 | 5.06706214313821 | 4.93551005266709 |
| ANXA8L1 | 8.17190734457474 | 9.04741296760534 | 8.32770083549364 | 9.39139397422191 | 8.21872789865668 | 8.51787406704405 | 8.62060473725418 | 7.7906156679313 |
| DFNA5 | 7.08544590219427 | 8.62922546002307 | 7.59063195801113 | 7.62809553249354 | 7.99469851087124 | 7.83447737064964 | 7.81036597981079 | 7.57279116171978 |
| PRG4 | 5.77314448285191 | 5.2860309489104 | 5.40642102139942 | 5.77936216594581 | 5.6053965468211 | 5.39857611584884 | 6.17426059157367 | 5.50237197739239 |
| ABCA8 | 5.38399912502312 | 5.09847430124963 | 5.05779539460583 | 5.05226806946318 | 5.20075150883553 | 5.1466538781448 | 5.08553640640018 | 5.05066419827007 |
| PROCR | 5.59102409598137 | 5.52909629432917 | 4.90740987235903 | 6.24468920762991 | 6.35401835590036 | 6.72275289552992 | 5.57385922157595 | 5.7219795793701 |
| CHGB | 5.60899843617667 | 4.87796505372071 | 4.69007062832314 | 4.57349571549561 | 4.89976535174205 | 4.92346773649243 | 4.84036755458598 | 4.71417406814248 |
| AOX1 | 7.657230902582 | 7.66849111375139 | 7.02217803066019 | 7.6049997746139 | 7.16892428570383 | 8.01600371911839 | 7.76012977697122 | 7.08675882526804 |
| CALB2 | 8.50937914891469 | 8.29153449354042 | 7.64006413604154 | 8.40549890081089 | 7.79050489564171 | 8.85724080221762 | 8.44388011439125 | 8.09876903815488 |
| HAND2-AS1 | 5.94884610349031 | 4.65740563396608 | 4.43873198157059 | 5.29241550846811 | 5.68709289099479 | 5.00492380183482 | 5.30994376133285 | 4.99753178300875 |
| BNC1 | 5.58474758326509 | 5.40788567480585 | 5.85378985390176 | 6.14784699761376 | 5.44664828524304 | 5.84534953815009 | 6.42712172938877 | 5.71712679207122 |
| BCHE | 5.00155907129185 | 4.53462193279252 | 4.58035053519934 | 5.56820239599014 | 5.13815914522947 | 5.45297424395827 | 5.31237474677515 | 5.15804209128137 |
| CLEC4M | 5.88790417212768 | 6.03337674645113 | 5.77678305327026 | 5.95219376356509 | 5.83908030323681 | 5.98342916861634 | 6.16184033057543 | 5.97466582058484 |
| NPY1R | 5.18894681713128 | 4.68412302478989 | 5.13071263746209 | 4.88586228897873 | 6.81556262078866 | 6.09785094491291 | 4.83305705339371 | 5.37440659257589 |
| TCEAL2 | 6.80066697967748 | 5.68458593555101 | 6.53555999888539 | 6.3374274483821 | 7.91060076054887 | 7.09743171267534 | 6.43361882199447 | 6.9107086807355 |
| MNDA | 6.02161075441503 | 6.27907379400521 | 6.21536797220348 | 6.906505825626 | 5.02554268521895 | 6.29343118383604 | 6.68171630223043 | 5.1351859738032 |
| PDE8B | 5.24857278531972 | 5.30968672413962 | 5.19887913525876 | 5.20561275585794 | 5.47469344043679 | 5.31909763785231 | 5.66673671209176 | 5.43092306950745 |
| REEP1 | 8.21806647127369 | 8.7290326702577 | 7.7427988418893 | 8.09886455157218 | 7.64513096882151 | 8.79094141949651 | 8.32525597756021 | 7.60245242609135 |
| ADH1C | 5.15483430764233 | 5.01637151388886 | 4.96839493043236 | 4.66675091197189 | 5.17358719926384 | 5.05544296707031 | 4.90397340426972 | 4.67582157550802 |
| SPOCK1 | 6.3552541793042 | 6.72500489976897 | 6.05740478108252 | 6.59040291210466 | 6.74027998267288 | 9.11037368431847 | 7.88807348816329 | 6.66367194988879 |
| KDR | 6.6723829091404 | 6.68707468958252 | 6.59758033585699 | 8.35678206861946 | 7.01471235152137 | 6.85441961350001 | 7.28090065322645 | 6.95498724888146 |
| GADL1 | 5.019328295219 | 4.68915376533732 | 4.48826434077015 | 5.12075419976694 | 5.03780389826511 | 5.1105762239539 | 5.13049849060174 | 4.74418801127159 |
| SFRP1 | 6.44788413365428 | 6.54423768769337 | 5.97889284769679 | 6.53524893345049 | 6.02606358800062 | 6.88544197296896 | 6.57824617400768 | 5.9870172403686 |
| BAMBI | 7.50876931906698 | 6.28792472863096 | 6.51484027210664 | 8.76139831196265 | 6.93072551214523 | 7.42467019907153 | 6.70955256918556 | 6.78868571061353 |
| LGALS2 | 5.04807921077655 | 4.87779822732511 | 4.93362456679455 | 5.20745950964668 | 4.80810183860815 | 5.06937565033899 | 5.20198665105764 | 5.02771583572603 |
| DIRAS3 | 6.19683126755448 | 4.80897189500585 | 4.86422081845318 | 5.57999469319869 | 5.83767081920623 | 5.8848713917597 | 5.55441387592393 | 5.57935214594235 |
| C21orf62 | 7.80666271324494 | 7.46827783602216 | 7.29159020582028 | 7.50635360377626 | 7.80393961739993 | 7.87896683292879 | 8.14680793835889 | 7.41069428894964 |
| TCEAL7 | 4.72683121703249 | 3.49616830946604 | 3.8937407957202 | 6.6111576224497 | 4.23512964203502 | 5.2962077591497 | 4.55869621492702 | 4.32658768052195 |
| OGN | 4.87014768246636 | 4.77511376997522 | 4.75245959535609 | 7.38544096000208 | 4.76167887539117 | 4.43205409931745 | 6.12311158913237 | 4.7372324680637 |
| SYT4 | 6.49485238516393 | 6.11962178113503 | 6.03012195382343 | 6.31252722812623 | 6.61919142426619 | 6.63278441017736 | 6.56674210431135 | 6.22260752143593 |
| LOC100506718 | 6.26698138504889 | 5.41217407704656 | 5.43872310049283 | 7.0790779664742 | 7.14703155703289 | 6.01414474323383 | 6.15961243554376 | 5.55217415477818 |
| GPRASP1 | 6.77908896158245 | 6.51807084630776 | 6.21484946875781 | 6.72640891631263 | 6.56645747957726 | 7.30180710684358 | 7.00911198949919 | 6.78551131910717 |
| NELL2 | 7.36994625526575 | 9.57792348942812 | 7.91657218399213 | 7.82460239697695 | 9.18687439525649 | 8.04483123344781 | 8.11613079054636 | 7.44869450679624 |
| AADACL2 | 4.56553015721379 | 4.02859567208245 | 4.42396131496228 | 6.54946895363669 | 4.16698853510564 | 5.01340419351255 | 4.4487357980294 | 4.35374672071372 |
| GHR | 5.23738015765315 | 6.32091244082713 | 4.39325143715703 | 6.52152663466103 | 6.14952765060886 | 5.43494842036561 | 5.34337228749958 | 6.04017572580286 |
| ADH1B | 6.36317063898293 | 6.24921113064888 | 6.11409993088888 | 6.07708273806463 | 6.16120949662976 | 6.35133371463082 | 6.40957898342351 | 6.20129127843494 |
| MGARP | 7.00301748491353 | 5.69977925656291 | 5.72867699054821 | 6.86689561778315 | 6.33311956208277 | 5.39520335943974 | 5.30314874586251 | 5.97450407427736 |
| IGFBP6 | 6.33916055053835 | 8.72199461243311 | 6.08899807000822 | 7.21831620724691 | 8.51069692628046 | 7.60411581398946 | 6.43316143722682 | 6.34925910990445 |
| GFPT2 | 5.95251528976459 | 6.15496388981691 | 6.29128122878601 | 7.00443397500364 | 6.16500544882654 | 6.38248396488694 | 6.94192792470872 | 6.34696397877199 |
| OLFML1 | 7.30355245558372 | 6.49413395654485 | 6.81700921407127 | 7.94076579097638 | 7.0496307677246 | 7.77776818225772 | 7.47354341193039 | 6.45672566877875 |
| NAP1L3 | 6.62618503644986 | 5.7533692020596 | 6.62359767721886 | 7.68475563228814 | 7.98728106846481 | 6.99353850836371 | 5.84818224088794 | 7.17708062681061 |
| HBB | 7.4663110268859 | 7.61145827864124 | 8.52721893996518 | 9.01499263635138 | 7.62253507796429 | 7.66839573199117 | 7.69981187048067 | 7.36127620841347 |
| DAPK1-IT1 | 5.45008949580185 | 5.44014161679081 | 5.80008710375202 | 5.8871572390883 | 5.15672424398076 | 5.09409669269088 | 5.906260481189 | 5.38559669601225 |
| ALDH1A1 | 6.62294498857969 | 6.49261592000015 | 6.07454396937043 | 7.81860134938059 | 7.91439111222612 | 6.63404867025844 | 6.67990228993158 | 6.2344802440623 |
| LRRN4 | 6.9826285780026 | 7.06224586090747 | 6.6074057758243 | 7.07687971540558 | 6.60051284879131 | 7.71556738235814 | 7.41080747619705 | 6.71591601541191 |
| HAS1 | 5.91441383626863 | 5.92467950830337 | 5.51107264819997 | 5.73232347594625 | 5.70363784398791 | 5.96831658758576 | 5.89154556295187 | 5.62023742371323 |
| LXN | 9.62061573322382 | 9.66075538109565 | 9.01552934833575 | 9.72454284315456 | 9.72544976647339 | 9.76025920931928 | 9.953436950486 | 9.75922242638451 |
| CLDN15 | 9.49637546217184 | 9.45432602898947 | 9.99867504280895 | 9.39627403647144 | 9.701784681587 | 9.19857027422461 | 9.39794517974015 | 9.29082869515844 |
| PDGFD | 6.96093619459802 | 7.00975920961316 | 6.97750260804749 | 7.5949926055569 | 7.30115319976576 | 7.51631068635495 | 7.226792686543 | 7.01724270186372 |
| PRSS35 | 4.33534032848771 | 3.33813912804328 | 2.74728212096863 | 4.57475547850367 | 3.79576694778239 | 3.94952559515481 | 3.56009128200093 | 3.18665743269269 |
| HBA2 | 8.9159869048938 | 8.99658647070489 | 9.46274287279913 | 9.47589011899607 | 8.75285728443057 | 9.35879659920601 | 9.17846442819716 | 8.72034459522191 |
| WNT2B | 8.4384945519319 | 7.78858702433994 | 7.29666021474678 | 7.59547979043365 | 7.38678637838022 | 7.87461594155224 | 7.8395533945318 | 7.33125331837775 |
| CHRDL1 | 6.35005871430109 | 6.40433945929721 | 6.26602939556086 | 6.56801841978292 | 6.77975874559653 | 8.18239931964397 | 6.50414365228547 | 6.92869009682289 |
| LOC101930363 | 7.77428631141561 | 9.76893195001749 | 5.61715740406822 | 6.36175958814346 | 6.20807044521327 | 7.0249512519801 | 7.29869496893632 | 9.11794173821839 |
| PAPSS2 | 7.01235561667552 | 6.72066061113215 | 6.52473080245173 | 8.03176533457079 | 6.71653507065125 | 7.6747143904105 | 7.61411718693727 | 6.42714407770965 |
| FLNC | 8.12427643198856 | 7.14405656963043 | 7.19030866981802 | 7.78246754017256 | 7.70659271251346 | 7.87066062667928 | 6.8876349308928 | 7.24126817732937 |
| PLPP1 | 9.67121817117506 | 9.6242754802933 | 9.71962582788263 | 9.85622942082594 | 9.68307180616699 | 9.69737768000995 | 9.50002222784039 | 9.54925715531966 |
| AQP9 | 7.16041602787261 | 7.75617600133583 | 8.12404374549454 | 7.03350009005256 | 7.1695442400094 | 8.14451549562468 | 7.75847641380715 | 7.47398168177521 |
| TMEM255A | 3.38624534329536 | 4.08047859433741 | 3.65126987333295 | 4.20658071417854 | 4.02108879648269 | 4.62527048937469 | 4.14477243042917 | 4.30800403113799 |
| HOXC6 | 9.16651963161369 | 8.74513310682732 | 8.337358758962 | 9.3754630521782 | 8.74038455915951 | 9.12361446971189 | 8.90057703259663 | 9.02297528168385 |
| LOC101926921 | 9.13139793312454 | 8.59261494019512 | 8.62847640600766 | 9.20969805958596 | 8.67511980470946 | 9.14056893757843 | 8.74634770459318 | 8.49304049460067 |
| PCOLCE2 | 5.48374484973105 | 5.27647805490318 | 4.73752453020769 | 7.15662919925323 | 5.54448847736888 | 5.68851049539355 | 4.91054559822467 | 5.490932683952 |
| RNASE4 | 6.66446577368202 | 7.56450773700536 | 6.21879569538655 | 7.34202842988245 | 6.4611536274468 | 7.1781170457064 | 7.13097512991147 | 6.06277040743071 |
| TCF21 | 6.70619346069899 | 6.15745507027299 | 6.35203724438033 | 6.84056268324129 | 5.94888463992801 | 6.84665690740417 | 6.69840880582789 | 6.3488078100404 |
| LOC101928635 | 7.96010535047564 | 8.88515487982922 | 8.0768401760903 | 8.09254309885533 | 7.89785634422888 | 8.43536189749141 | 8.31016968128556 | 7.67995857265468 |
| PKD2 | 5.11123167278638 | 6.67448889954187 | 5.55930825254051 | 6.76403558039637 | 6.21806235305344 | 5.95018843322466 | 6.08916548924906 | 5.88515213371038 |
| WNT5A | 8.2410345428905 | 7.08461707854059 | 8.78764467908644 | 9.70888730306891 | 9.06566789429746 | 7.27399602434421 | 8.00974745474337 | 7.33824165945966 |
| FGF13 | 6.85550390155448 | 5.88248165410957 | 7.28678875913321 | 7.52646011467275 | 6.09083438065491 | 6.97849310909126 | 6.06473414357766 | 6.7676283168078 |
| LHX2 | 6.27011681842302 | 6.50178305794886 | 6.44035094982719 | 6.47833603811765 | 6.33687427186679 | 7.04647468965089 | 6.47820901292996 | 6.3178864996897 |
| ATP10D | 5.82700092685437 | 6.61774073415673 | 7.22459021231384 | 7.86722931033902 | 5.738403064415 | 6.53193503725786 | 6.23099455657009 | 6.33886115080377 |
| ARHGAP18 | 7.9027236106291 | 8.93066934008765 | 8.02432947068342 | 8.7282593119963 | 7.29006493868965 | 8.0141663118774 | 7.85844419998571 | 7.25378509682588 |
| LOC286191 | 8.17357720591335 | 7.80073168351708 | 6.89473289639766 | 7.84525167294063 | 7.24328825182206 | 8.42209841464434 | 7.81530003021193 | 7.07364888166241 |
| EFEMP1 | 5.47194935729667 | 6.38184343305123 | 6.22222302353645 | 6.68550850844164 | 5.52355358212889 | 6.67837995242263 | 6.7391014552223 | 5.4188713220919 |
| LOC100996760 | 5.31637386127432 | 6.53500003280308 | 4.51565568956357 | 8.13815402434123 | 4.24231287087983 | 6.78460867398153 | 6.82948173732501 | 4.52039081691954 |

| **Gene** | **GSM461367** | **GSM461368** | **GSM461369** | **GSM461370** | **GSM461371** | **GSM461372** | **GSM461373** | **GSM461374** |
| --- | --- | --- | --- | --- | --- | --- | --- | --- |
| CD24 | 11.3450720726654 | 10.3852384996269 | 11.0168375312086 | 10.9684983249563 | 9.9932243691761 | 11.5564025907599 | 12.4727889785091 | 11.9337835863022 |
| CLDN3 | 9.51722056734589 | 8.83543936904608 | 9.28975609579535 | 9.35715938860075 | 9.26763996086035 | 9.54570393827446 | 11.3564104274896 | 9.45571969505267 |
| C1orf106 | 9.5001208497128 | 9.03220831377167 | 8.52281297158143 | 8.81700281640985 | 9.31589449810724 | 8.89588726458059 | 9.36235152959861 | 8.43753986508928 |
| CRABP2 | 9.89741137238826 | 10.3928218484753 | 9.83300865197089 | 9.72490772671819 | 9.68994382567425 | 11.1357734044592 | 11.3044140709726 | 11.7737779730928 |
| SOX17 | 9.3288028121999 | 8.88821355475622 | 9.2360823773678 | 9.49162565355904 | 9.12297807904086 | 9.36735359103881 | 10.6477102465033 | 10.6716560531504 |
| ELF3 | 9.70622489369811 | 9.11498814501228 | 8.7447901188056 | 9.22554968990391 | 7.29233697544858 | 9.15858780906709 | 9.61580555779887 | 8.47837864568599 |
| EPCAM | 11.7666572712759 | 10.7830145844806 | 11.0005564010342 | 11.0371282233751 | 11.399422133392 | 11.8861576264991 | 12.4922187331103 | 12.601452784861 |
| SCGB2A1 | 11.5484414413782 | 9.71077027979067 | 10.4555840875786 | 9.7183753268809 | 8.93576617009054 | 11.5559694945995 | 11.0522419811811 | 8.02259529700298 |
| KLK6 | 8.3953756123762 | 9.05750984169524 | 9.30042120397862 | 9.62077699781713 | 8.57381757448337 | 9.27349724047299 | 11.2031705613803 | 7.27022056139097 |
| MMP7 | 10.0727355555038 | 10.1670793863575 | 8.55370224271948 | 9.70662379149683 | 6.42952223618932 | 8.33391116922779 | 12.6889627371137 | 11.4608193400506 |
| CLDN4 | 8.89180496383068 | 8.71611637266489 | 8.63269899634591 | 8.87836517444238 | 8.81362569237171 | 8.85711636276277 | 10.16658051233 | 8.98845037179849 |
| CKS2 | 10.1077793947 | 9.31798008279711 | 9.97630634841999 | 9.94719858426206 | 9.72549577933848 | 10.227459512619 | 11.2374669216592 | 11.206312330764 |
| CP | 10.750780249493 | 9.55781069168601 | 9.29449726453313 | 9.44120126061824 | 8.73125113789623 | 10.7628049430125 | 10.4583514985673 | 7.16581347867203 |
| PSAT1 | 9.32400835823034 | 8.99035644885924 | 8.93413165688556 | 9.55430872677637 | 9.4008559602843 | 10.1187866753344 | 9.86962468620432 | 10.5482155216751 |
| MECOM | 8.60452016809711 | 8.22290635430045 | 8.5681230306195 | 8.95142757842026 | 7.70389900663299 | 8.55546272202788 | 8.90923241214008 | 9.72750143371732 |
| ESRP1 | 9.44508418463809 | 9.46118166885697 | 9.55294954092874 | 9.20718396723375 | 9.52369818237706 | 9.99472184281505 | 10.4599003159189 | 9.51262689917605 |
| WFDC2 | 10.5064870681771 | 9.07114572060763 | 9.93909588488106 | 10.498690937096 | 9.30669629007167 | 9.97313643988719 | 11.3646262697288 | 10.7411282107654 |
| CEP55 | 9.2871328768491 | 7.02624677264819 | 8.63372181264101 | 9.49904062261487 | 6.48599831746788 | 9.9913942937244 | 10.4444351675731 | 9.74263617414067 |
| MUC1 | 11.2412773151239 | 10.9278194352656 | 10.9032908921577 | 10.8663114700257 | 10.6702021270053 | 11.0251739449468 | 11.9045867067651 | 10.5156717852792 |
| MCM2 | 9.61902778072415 | 9.21709739650696 | 9.2109099470308 | 9.63635816858909 | 9.48194268517972 | 10.097676630726 | 10.3898679153964 | 11.5114710042996 |
| FAM83D | 9.31171426200573 | 7.75005708283947 | 8.89756717352088 | 9.80659473067343 | 7.65732559604057 | 9.55088720086711 | 9.72042896616001 | 10.24945719283 |
| ZWINT | 9.66636071942428 | 8.80597597424658 | 8.91210791425808 | 9.75298268928283 | 8.69076627263824 | 9.10950943935485 | 10.2567158429311 | 11.309970809952 |
| NEK2 | 8.37521845347917 | 6.33517505100997 | 7.8567159059754 | 7.67072882458947 | 6.84965780458001 | 8.20851555280789 | 8.65172784086855 | 9.05315058092455 |
| BUB1B | 9.41372311837183 | 8.19172055526403 | 8.28400508776226 | 9.43503054168498 | 8.37164162354057 | 9.68965734339824 | 9.84993516466436 | 10.8253801940522 |
| DLGAP5 | 9.03370655685537 | 7.09692594384361 | 8.03704720900146 | 9.15883181838092 | 7.07128000295971 | 9.32625869068383 | 9.03547820336934 | 9.86811569251467 |
| MELK | 9.31605973569557 | 7.42900494887912 | 8.59620839549481 | 9.40189067565149 | 7.65705400569832 | 10.2440783602088 | 10.7857712154178 | 10.0454320491549 |
| FZD10 | 6.40959289930633 | 8.25910767890891 | 7.8157547299589 | 8.63976395770784 | 8.57117620865944 | 7.70878041825306 | 10.3698917437985 | 8.76250163541451 |
| LPAR3 | 7.93571903243645 | 8.73362210925033 | 9.34195017738577 | 8.98427888234175 | 7.69458842139461 | 9.06873260535242 | 9.28502299917622 | 9.92879001160284 |
| ITLN1 | 7.00568068409558 | 6.57170259381926 | 6.94491699555454 | 6.90044419942475 | 6.84169642493633 | 6.80807608930126 | 6.97532065042248 | 6.89263388342444 |
| LINC01105 | 5.03846252078472 | 5.09229485485088 | 5.33691175181291 | 5.58273361939102 | 5.43235926159133 | 5.28221244771206 | 4.89199911339672 | 5.0672715865315 |
| ANXA8L1 | 8.25829749096408 | 8.36390695830882 | 8.23982762391856 | 8.55736413592979 | 8.38381227458861 | 8.46347941606802 | 8.0930160629477 | 8.21836949157721 |
| DFNA5 | 7.22656632893294 | 7.41942933691305 | 8.03273452858671 | 7.7351159559674 | 7.27307756907144 | 7.1574479962743 | 9.08760869458922 | 7.31271962207201 |
| PRG4 | 5.61198381534341 | 6.43047596913411 | 5.92446336478479 | 5.72416456267886 | 5.70736741547361 | 5.45462008535981 | 5.63118578825787 | 5.68969053633174 |
| ABCA8 | 5.04389857781163 | 5.0782969863084 | 5.5956369377421 | 5.31429530640334 | 5.11130959711691 | 5.29843470982863 | 5.2240222481372 | 5.2000504580398 |
| PROCR | 6.32764964381758 | 5.51590164380315 | 5.62302110201523 | 6.32092868248505 | 4.80631890121555 | 6.00654264186576 | 5.5239539394967 | 7.61323695471633 |
| CHGB | 4.8250427229773 | 5.3038136193352 | 5.4506834011444 | 5.32995595625429 | 4.93420037615008 | 4.68859441643649 | 5.29207863212084 | 4.74046888951452 |
| AOX1 | 7.60174219416858 | 8.07857514589981 | 7.67946215367503 | 7.96710461188792 | 7.82676074486691 | 7.55546686342394 | 6.94299884114586 | 7.06270080266355 |
| CALB2 | 8.34131421845788 | 8.47628446764463 | 8.39367789518048 | 8.62805177556695 | 8.5251840757067 | 8.30743763308674 | 7.58365446554735 | 7.73587414328463 |
| HAND2-AS1 | 4.92766372692164 | 4.96434779964383 | 5.0185985691824 | 5.22514765485776 | 4.6825423981743 | 4.81511426655046 | 4.63092961137579 | 4.7811104992212 |
| BNC1 | 7.40584816803086 | 6.65216450567232 | 6.62439996250852 | 6.1065011747636 | 5.83464763895485 | 5.95305217196465 | 6.57496356663165 | 5.85832048599609 |
| BCHE | 5.37126262669667 | 6.33161028037329 | 6.00562679463188 | 6.06437847530762 | 4.86736276575328 | 5.38749696000042 | 4.70034538499672 | 4.72408268549745 |
| CLEC4M | 5.95710436380596 | 5.93978840462002 | 5.96581429240686 | 6.42068871282337 | 5.85388464717795 | 5.80842237900631 | 5.87946684913891 | 6.18498143410661 |
| NPY1R | 6.02964281782405 | 4.71141230724125 | 7.59100613779258 | 4.97612988920232 | 4.83690372349356 | 6.09630613528902 | 4.47579826973591 | 4.26680902407879 |
| TCEAL2 | 6.55349567285857 | 6.2546204962307 | 6.65756855459538 | 6.86811878000244 | 6.53821687368982 | 6.55857224569129 | 6.21820188149739 | 8.69050788971031 |
| MNDA | 6.02800327847275 | 7.13076616921084 | 6.57972926235744 | 7.14187212145989 | 6.16929969809908 | 6.21644904468503 | 5.59831458146714 | 5.12400134080183 |
| PDE8B | 5.40641081664794 | 5.29657854461708 | 5.41123074323481 | 5.98862713685994 | 5.41163866828783 | 5.38902638822428 | 5.19872986886563 | 5.56484456050123 |
| REEP1 | 8.18616823123844 | 8.34846747197576 | 8.20339254351314 | 8.42369665400127 | 8.04592753381984 | 8.12247109390099 | 7.92737264707939 | 7.82330449896387 |
| ADH1C | 4.8605208862108 | 5.84384820826415 | 5.38866828916005 | 5.66390815100006 | 4.45756146117517 | 5.19286090250149 | 4.78507445706115 | 5.17120282348541 |
| SPOCK1 | 6.84442331685515 | 6.03539737123034 | 7.42255259221487 | 6.77787993678281 | 6.08708302300395 | 5.99475846613556 | 6.47790880068129 | 6.69290139721609 |
| KDR | 7.26157782617718 | 7.33355790671212 | 7.03741516989971 | 7.2359184875622 | 7.03268494585262 | 7.68050018162101 | 6.21378857781125 | 6.69206447003118 |
| GADL1 | 5.03034490756696 | 5.11803988534831 | 5.04911667247023 | 4.4689612093012 | 4.59093130959972 | 4.52692015125163 | 4.84181717065832 | 4.85494814993851 |
| SFRP1 | 6.18419944806325 | 6.87655623644813 | 6.63819803976571 | 7.02282329982118 | 6.75940320975066 | 6.27108853224028 | 6.31166749457684 | 6.98699136669682 |
| BAMBI | 6.0777941604035 | 7.25341260227038 | 7.1331422124006 | 7.00159960269533 | 7.0679720778857 | 6.4333951555902 | 6.80971025900219 | 7.52911035354517 |
| LGALS2 | 5.30124375842563 | 6.18286507691157 | 5.47863858810347 | 5.09323056314516 | 5.27426911702611 | 5.04482686296242 | 5.2645289247618 | 4.94623490695821 |
| DIRAS3 | 6.08401960520005 | 5.53336399833981 | 5.11410878275142 | 5.60087332754184 | 5.65456729303256 | 5.29194975151351 | 6.32368530888354 | 5.80010004995461 |
| C21orf62 | 7.60340899717682 | 7.89434486979095 | 7.77327440152021 | 7.74452374244438 | 7.77096742978505 | 7.60413805863526 | 7.53691157677494 | 7.59704691711509 |
| TCEAL7 | 4.2825287659865 | 4.84050855342079 | 4.88425600961487 | 5.19929542832832 | 4.08431943591921 | 4.59434550698746 | 4.86257041247631 | 6.77635406863959 |
| OGN | 4.91131528176891 | 6.29695840910583 | 5.54474656359413 | 5.38691783435349 | 4.68748906483849 | 4.95131036265083 | 4.6946517944248 | 4.8577396966409 |
| SYT4 | 6.6148982654484 | 6.11866911464556 | 6.24777943977495 | 5.98674540148027 | 6.17313742994714 | 6.06880191972161 | 6.24498217037655 | 6.27012896888604 |
| LOC100506718 | 5.94254657269213 | 6.58560605462781 | 6.55915220761049 | 6.48496249770061 | 8.65425770285544 | 6.01236157290567 | 5.81862563342118 | 5.92816420900463 |
| GPRASP1 | 6.47215792847441 | 7.28533748109385 | 6.46575739111472 | 6.30970007359729 | 6.59590939126292 | 6.33890036144759 | 6.09611634473003 | 6.41155335728832 |
| NELL2 | 7.99612883906224 | 7.75333042171426 | 7.88551335601785 | 9.07828959873117 | 8.469495301982 | 7.74303018243616 | 7.07458036070964 | 7.78954668622252 |
| AADACL2 | 4.30654660872088 | 4.8600589686961 | 4.34716955601921 | 4.64120496711181 | 4.56456718216025 | 4.72549032603854 | 4.79332888664853 | 4.62716322291383 |
| GHR | 4.79632779448694 | 5.18287897780262 | 5.72375240035699 | 6.19509754626305 | 8.21526603399617 | 4.92332035364441 | 4.14898289834745 | 4.35413475532575 |
| ADH1B | 6.03059596521411 | 6.68821113724513 | 5.94684371246391 | 6.16564919582434 | 5.9912627612677 | 5.98718611865132 | 6.10073545472403 | 5.90831995875667 |
| MGARP | 5.32470261322313 | 6.69894075638756 | 6.28327174657939 | 6.58389511275398 | 5.76666141181726 | 6.02103547951136 | 5.41997028720838 | 6.09923628326711 |
| IGFBP6 | 8.89244870827409 | 6.72684483757848 | 7.03359919780549 | 7.84779651832754 | 6.54408812055593 | 6.95567315318264 | 6.75563537238322 | 6.82995101162497 |
| GFPT2 | 6.76742969059087 | 6.87560806941597 | 7.55732583961235 | 7.06434398159925 | 6.28584050961849 | 6.71386074768361 | 6.38277963472645 | 6.70445701932884 |
| OLFML1 | 7.09619859037106 | 7.64978788242966 | 7.60002438646054 | 7.94454809247221 | 7.39739226914987 | 7.4027221768456 | 6.75132981468398 | 7.17168721868987 |
| NAP1L3 | 5.42266359165502 | 5.57508537884393 | 6.44393977213954 | 6.5703247875766 | 7.16166602225662 | 5.6248787807419 | 5.09617328451936 | 6.82099583272699 |
| HBB | 7.68748066652176 | 8.86670324603134 | 8.06378469116769 | 7.74404501585653 | 7.72210564725162 | 7.73554079303305 | 7.43059681395663 | 7.78569929911148 |
| DAPK1-IT1 | 5.67792819200359 | 5.60570173894998 | 5.36192272514341 | 5.56770058742759 | 6.35460907404764 | 5.83597206226189 | 5.61266506847616 | 5.26338376623536 |
| ALDH1A1 | 6.40088455826732 | 7.32999361636143 | 6.63885001844978 | 6.9382387364839 | 6.0988679720456 | 6.45060422789002 | 6.42843555102748 | 5.80388829233782 |
| LRRN4 | 7.46234684987681 | 7.65685385377779 | 7.49458361634154 | 7.94989089394392 | 7.65873632828943 | 7.24700797694362 | 7.15259920908169 | 6.82235668119344 |
| HAS1 | 5.84266964972316 | 6.06226853044084 | 6.23295041780424 | 6.40993735947248 | 5.77867905800615 | 5.97350336781294 | 5.72639256670258 | 5.93831402438747 |
| LXN | 9.84125297503837 | 9.82163847386266 | 9.33875866340636 | 9.90666515689552 | 9.88216156125117 | 9.89059108872065 | 9.93006757058801 | 9.08497044941524 |
| CLDN15 | 9.36806660164556 | 9.4906964730394 | 9.95851139141339 | 9.55678575328897 | 9.33546851716854 | 9.57132507984796 | 9.96997499210302 | 9.89391655520521 |
| PDGFD | 7.40632662469384 | 8.0472493584026 | 7.54079448918437 | 8.08296066169884 | 7.68431732512148 | 7.58843356371576 | 6.85457046557802 | 7.05967974367042 |
| PRSS35 | 3.53366301282309 | 4.09810790143754 | 3.56733856864401 | 3.99549356395913 | 3.8442651220663 | 3.89287670006069 | 3.27795648804797 | 3.34308086913482 |
| HBA2 | 9.27356445349465 | 9.89710905053032 | 9.27270598105456 | 9.2972219914151 | 9.33677729468013 | 9.17789454499056 | 8.9799062507011 | 9.07806850637479 |
| WNT2B | 7.69308057601401 | 7.81697018789532 | 7.82659424605551 | 7.7808049890133 | 7.72500438834899 | 7.69445870692474 | 7.73047760962888 | 7.59305342726778 |
| CHRDL1 | 8.07290969454135 | 7.52925874802542 | 7.49815511025437 | 7.91872611511397 | 7.84323015049655 | 7.43736924448043 | 8.38556477365699 | 7.52904005609508 |
| LOC101930363 | 7.13846636526503 | 8.87775345078089 | 6.58292927313785 | 6.44430098025769 | 8.42258622931072 | 6.75066009578082 | 6.76846224842605 | 5.92200274781481 |
| PAPSS2 | 7.12390618427196 | 7.41651128202356 | 7.21496794477137 | 7.83348953817948 | 6.70366875139262 | 7.32991829516405 | 7.15693082333341 | 6.75521073650606 |
| FLNC | 6.91163166804352 | 7.3130553425053 | 6.95142460588543 | 7.49076264807755 | 6.908308548686 | 7.08133962745194 | 6.79483171849419 | 7.23966535228573 |
| PLPP1 | 9.7754695432323 | 9.65210192815265 | 9.78380939443731 | 9.64847353227856 | 9.65708617038145 | 9.66200071871848 | 10.2306749656402 | 9.9160302117366 |
| AQP9 | 7.56088305533161 | 8.39791844812631 | 8.2557603571268 | 8.57775358669915 | 9.01551541029017 | 7.98911061652211 | 7.66476014566493 | 7.47918204795879 |
| TMEM255A | 3.29238863488186 | 3.56514626319517 | 6.66989132949279 | 3.58415677103619 | 8.41430469462396 | 3.82779870482576 | 5.3073775199205 | 4.12320265869543 |
| HOXC6 | 8.95343986067379 | 8.65451430718633 | 8.77348541198653 | 8.82658026436476 | 8.61974679330286 | 8.71787859181598 | 8.45247600681674 | 8.8586648694568 |
| LOC101926921 | 8.81226652838864 | 9.12989431445698 | 8.85333149355952 | 9.13801058855838 | 8.7801112422726 | 8.94126015557939 | 8.60210013832795 | 8.28334267565786 |
| PCOLCE2 | 5.2149019101607 | 4.96467124900482 | 4.5134212621047 | 5.09789307206982 | 6.80427302444457 | 4.971764252167 | 4.91916366809884 | 6.18614792267213 |
| RNASE4 | 6.18911786051048 | 7.00171218395292 | 7.09865851887157 | 7.25196046823647 | 7.68033139024653 | 6.39493765538044 | 7.02616265448968 | 5.89482867440565 |
| TCF21 | 6.44869202928467 | 7.18879948605769 | 7.20460831150709 | 7.02457898989871 | 6.64583493111751 | 6.73875703005529 | 6.53605056829591 | 6.65509346574269 |
| LOC101928635 | 8.14274910521626 | 8.3298658370071 | 8.18483320171602 | 8.40388973342278 | 9.11192723955704 | 8.16917841398865 | 7.94733215012801 | 7.91887128534432 |
| PKD2 | 5.68392939987347 | 5.34951036080291 | 6.55797826997621 | 5.7831370677762 | 6.49260470492664 | 5.68175002969345 | 6.99933485444755 | 6.40496781859331 |
| WNT5A | 7.75710327544756 | 6.89655643569182 | 6.95566153040233 | 7.24521516644997 | 8.23855521125851 | 8.03326605861706 | 7.72583316218243 | 6.10133806627801 |
| FGF13 | 5.7722446233754 | 5.86297203638255 | 6.09102275091852 | 6.5241060003977 | 6.58844330845678 | 5.72427645397914 | 7.87236707249455 | 7.18880640798858 |
| LHX2 | 6.56695287307156 | 6.28250652625574 | 6.51737255212512 | 7.16974966326554 | 6.7581559096006 | 6.63652964603548 | 6.35884720950806 | 6.22888986169569 |
| ATP10D | 6.52889320148097 | 6.31812700055033 | 6.2558122763164 | 6.37838330092077 | 5.95233123643395 | 6.78585129981266 | 6.39842733300861 | 6.98211514512025 |
| ARHGAP18 | 7.93137123318807 | 7.96657332114408 | 7.62125775252842 | 8.25894881901541 | 7.83890912692043 | 7.96240692688981 | 8.53168712351534 | 7.26832802345982 |
| LOC286191 | 7.0520463040272 | 8.13261282734554 | 8.04294523225425 | 7.99857350653709 | 8.39843588416214 | 7.40160486971496 | 7.46072618432517 | 6.95617284417672 |
| EFEMP1 | 8.34960161862789 | 8.54723901840763 | 7.32076264802932 | 7.68788093192041 | 8.26359753401644 | 6.76567131856505 | 6.83917480790549 | 5.8120464267572 |
| LOC100996760 | 4.50841597501534 | 5.02267407577347 | 5.01822021224076 | 5.37149962029491 | 6.14597085485923 | 5.11892446606631 | 6.05339810877741 | 4.21216464270885 |

| **Gene** | **GSM461375** | **GSM461376** | **GSM461377** | **GSM461378** | **GSM461379** | **GSM461380** | **GSM461381** | **GSM461382** |
| --- | --- | --- | --- | --- | --- | --- | --- | --- |
| CD24 | 11.9976251960244 | 11.9419590928039 | 11.5696468613586 | 9.58103049962527 | 12.8251913503858 | 11.3738050624012 | 10.6281318433538 | 10.6085202007761 |
| CLDN3 | 10.1912770215922 | 8.78898417511688 | 9.4900455901034 | 8.68915761011051 | 11.0264874784367 | 9.15172819440234 | 8.00489010348114 | 8.83996588415457 |
| C1orf106 | 10.2926782358256 | 9.22902546196681 | 9.80258260155889 | 7.79386337733769 | 10.1223362301833 | 9.59444777832071 | 7.35933667526794 | 8.62550794748977 |
| CRABP2 | 11.9912064877933 | 10.777123781443 | 11.1398902436085 | 9.99551278456928 | 9.25357569865177 | 10.1727650147975 | 7.69850326567976 | 8.60899400223791 |
| SOX17 | 11.2325408469668 | 10.034378057826 | 9.18585415948343 | 8.00413898756914 | 11.4361128972809 | 9.71436917194166 | 8.70047613185926 | 9.77187650223461 |
| ELF3 | 9.47036603520079 | 10.1912036002232 | 9.57834249729644 | 8.68030794426588 | 9.21222561462453 | 8.18576085114682 | 8.24298669235914 | 8.66365771967114 |
| EPCAM | 13.1888577034057 | 12.074469310735 | 11.824557052311 | 11.835750420099 | 13.0591821992117 | 11.5598024746552 | 10.5926345600618 | 10.9693865213423 |
| SCGB2A1 | 10.6565589365125 | 11.7971102786269 | 10.3509723211744 | 7.84301653238564 | 12.5623282963702 | 10.696428587676 | 9.26533609066273 | 9.06784035572389 |
| KLK6 | 11.1143540098182 | 9.33526081898346 | 8.92761798292069 | 7.47448471635296 | 6.4808774264866 | 8.7060435400499 | 7.44039580295498 | 7.58085399214028 |
| MMP7 | 11.9244302575262 | 11.1691170162853 | 7.12462797594717 | 7.0035572641887 | 12.8458036462159 | 9.49603285506646 | 6.63793477553514 | 9.36563786476557 |
| CLDN4 | 8.78077759980688 | 8.37002038755598 | 8.79116126023013 | 8.40321232478608 | 9.86321757308483 | 8.73298819672985 | 8.78400005095996 | 8.67987766554976 |
| CKS2 | 10.9354965808482 | 9.19250981894195 | 9.84601214934055 | 9.5755487008995 | 10.7512260286114 | 9.89494960021313 | 8.70853558770414 | 9.80813885243166 |
| CP | 12.0169310020625 | 9.90970906093058 | 10.474758218498 | 8.31938535963222 | 10.3617097004987 | 9.41422804571362 | 9.12118639993738 | 9.00680011918156 |
| PSAT1 | 11.0404578886375 | 7.56212410310925 | 9.85214557191749 | 8.35220678216721 | 10.2942600300397 | 9.52700482737332 | 9.61032080439729 | 9.40869169610083 |
| MECOM | 10.787383324231 | 9.08986356639771 | 9.19182693371954 | 8.32500766469558 | 9.82548148358509 | 8.90664008593404 | 7.91470969455348 | 8.67897640545497 |
| ESRP1 | 11.3751562110458 | 9.84179940532026 | 10.1404578678757 | 9.56646033371359 | 10.9038072995467 | 9.49494256348289 | 9.25737605592031 | 9.12852411435971 |
| WFDC2 | 10.7782121088673 | 10.0932419212567 | 10.0285953958362 | 9.42456978170125 | 11.4294656407691 | 9.17368504799635 | 8.23831922605825 | 8.94112069321056 |
| CEP55 | 10.0936948521173 | 7.37098376084676 | 9.45463859039946 | 8.30338806254494 | 6.47810787022863 | 9.07645487819887 | 7.72278704304716 | 8.80263268074904 |
| MUC1 | 12.1215111774099 | 10.2728245414922 | 11.34684925205 | 10.5498725676491 | 11.7072207807431 | 10.7357001449088 | 10.3419905635402 | 10.3281118747225 |
| MCM2 | 11.283869697705 | 8.61503367808316 | 9.44123861629828 | 9.99940814822799 | 9.05478337195981 | 10.2087830390862 | 8.81738662588768 | 9.16729268863431 |
| FAM83D | 9.32341735942608 | 7.68250307099661 | 8.85874566955303 | 8.96424266298583 | 8.07133364052812 | 9.16657486371185 | 7.96271095843497 | 8.86129786532945 |
| ZWINT | 10.5946978273239 | 8.45544641240691 | 9.77358431251952 | 9.98380593109101 | 8.23622471909847 | 9.852740163392 | 7.96033214976481 | 9.47484565727217 |
| NEK2 | 8.4067103385889 | 6.40690345368829 | 7.93095904619855 | 7.36369324102164 | 7.66063595749363 | 8.24414164535407 | 6.73357059306995 | 7.83131927940751 |
| BUB1B | 9.94497261561337 | 7.3092398643501 | 8.94423474354945 | 9.01739582952472 | 8.40738674449641 | 9.33779135853638 | 7.93748564127727 | 9.2395054491471 |
| DLGAP5 | 8.6253873967157 | 5.96977905367961 | 8.83109185283332 | 8.73421170292528 | 7.8901183278856 | 8.69099319244599 | 7.34483737181661 | 8.75066679450901 |
| MELK | 10.5465472455054 | 8.96155387723913 | 9.07663925688038 | 8.87320107944863 | 9.13689885864852 | 9.15665953335721 | 8.44184862219241 | 9.38550222104792 |
| FZD10 | 6.56917358390999 | 7.57461623186779 | 8.18435964839981 | 6.4021713075788 | 9.94652618314467 | 7.31056734173005 | 5.14365463452604 | 9.04524636919723 |
| LPAR3 | 10.5040448083157 | 9.03115916857678 | 9.23680470614629 | 9.44736429700244 | 9.53591589211791 | 9.88554081009623 | 8.01706700265248 | 8.97785087729312 |
| ITLN1 | 7.26455519642122 | 6.43895648503924 | 6.94010800763215 | 6.82680268428583 | 6.75248100445637 | 6.41777658156969 | 6.73367972385188 | 7.6012136557339 |
| LINC01105 | 4.96299624458522 | 3.72063964108459 | 5.1001254409334 | 5.61801248249684 | 5.07879199589152 | 5.11475430160109 | 5.64705735185701 | 5.22909181490199 |
| ANXA8L1 | 8.13509873662841 | 2.76823091380947 | 8.80280390613687 | 8.3801796417605 | 8.42727093517358 | 8.44565636098349 | 8.52594357228725 | 9.01283401470807 |
| DFNA5 | 7.73047693031733 | 6.27065601354966 | 7.36931815832125 | 7.41478669650602 | 8.48888852015948 | 7.55112376043133 | 7.88318090317329 | 7.3164354110105 |
| PRG4 | 5.56062936833176 | 3.9923968345709 | 6.20068482028261 | 6.06647888081152 | 5.23179334427252 | 5.88853139457852 | 6.55976711041814 | 5.90817402315433 |
| ABCA8 | 5.52752601776183 | 3.66184763043511 | 5.18371806550157 | 5.73887138832899 | 6.49053269882705 | 5.53569631772763 | 5.21071743137307 | 5.46081243649636 |
| PROCR | 5.87075678341903 | 3.25935987479546 | 4.83705010876979 | 5.77485556951979 | 6.46750610665864 | 6.84403407628805 | 5.75298135168858 | 7.37688073382959 |
| CHGB | 5.00629353510981 | 4.11810219752102 | 4.79343814172242 | 5.75889476122466 | 7.60313670986243 | 5.39896253751979 | 5.08223847502713 | 5.69364864179617 |
| AOX1 | 6.84942261648854 | 5.28492864123184 | 7.56930728002643 | 7.79360168370661 | 7.70409730365561 | 7.78345534472362 | 7.93779398715467 | 8.5194003706113 |
| CALB2 | 7.8679396947888 | 4.91697815652856 | 8.09842692720171 | 8.26003977412412 | 8.02890061573433 | 8.57581528002744 | 8.65104810238083 | 8.47507271988851 |
| HAND2-AS1 | 4.5482861819848 | 2.94745202738396 | 5.11171367598932 | 4.98310761722557 | 5.46499819349456 | 4.66421543913817 | 5.14235625177273 | 5.15120939288489 |
| BNC1 | 6.19671817674419 | 5.86222075989992 | 5.87734794509835 | 8.15705634580214 | 5.9161099526603 | 5.61941447794365 | 5.95132318632178 | 5.85687491960624 |
| BCHE | 4.7660438430127 | 2.82189385618037 | 4.30316701571115 | 4.75785533056834 | 5.35540395756474 | 4.76317252198227 | 5.76855487774597 | 4.96725623660331 |
| CLEC4M | 5.89072392031509 | 3.99992335479005 | 5.89206067407781 | 6.03716474701171 | 6.14360872110646 | 6.15669492233909 | 6.21175399357969 | 6.02508196409065 |
| NPY1R | 4.6477865033327 | 3.99467022922132 | 4.39380057504463 | 4.6882139352724 | 4.88356705632249 | 4.66217701013376 | 4.95644237303644 | 5.80701224129044 |
| TCEAL2 | 6.57509294448061 | 4.64010029789039 | 5.95252227866883 | 6.1338450177919 | 8.90062231383722 | 7.23354298661292 | 5.70462577807935 | 6.8106744512139 |
| MNDA | 6.69481056297988 | 5.98353633648898 | 6.70080034682461 | 7.15987133677839 | 6.8157163101713 | 6.02063553940722 | 6.34114606497574 | 5.85347923755494 |
| PDE8B | 5.53619800194639 | 4.15969699218626 | 5.36470314434967 | 5.55500523931998 | 5.42937828488445 | 5.70764535095021 | 5.31821440273456 | 5.24716294827429 |
| REEP1 | 7.50536895371799 | 6.04888134742642 | 7.89980008702379 | 8.02322429764477 | 7.75964987757823 | 8.23758833470363 | 8.35980467592938 | 8.21644079899355 |
| ADH1C | 5.39306948913553 | 0.510607529603665 | 5.21873467847304 | 4.45584008737036 | 5.02478950704328 | 5.35140218362996 | 5.02463882421184 | 5.14778290494072 |
| SPOCK1 | 5.87338505001689 | 4.83008796021272 | 5.95333043357331 | 5.83674975053794 | 6.08614259569972 | 6.20915309784825 | 5.83270270475488 | 6.82485693706616 |
| KDR | 6.61875402155434 | 6.48545097922881 | 6.15272493661388 | 7.12835527189724 | 7.57316999683762 | 6.81207459609358 | 8.39077944607822 | 6.83541884047548 |
| GADL1 | 4.87299616153356 | 3.963122655451 | 4.11156554495952 | 5.12287974975524 | 5.43238154563156 | 4.77580910055703 | 5.02666286402829 | 4.72572479932459 |
| SFRP1 | 6.10326524973138 | 5.8820614526886 | 6.19189423032429 | 7.43617454314535 | 8.1206598654902 | 6.46551702175773 | 6.64070370537856 | 6.50133802557203 |
| BAMBI | 6.15539709570774 | 4.4695148382094 | 6.54028770479196 | 7.26338188817981 | 8.75582227937822 | 6.99064859545338 | 7.61053766713396 | 7.63033994060448 |
| LGALS2 | 6.16242758451179 | 3.01065632731524 | 5.73857870707632 | 5.49435160298646 | 5.1795190121427 | 5.30265902771139 | 5.35191802619372 | 5.22224041510131 |
| DIRAS3 | 5.02090217846186 | 4.08048712193704 | 4.68528422888892 | 5.25426144716564 | 7.41196851036013 | 5.67069590055994 | 4.60814686996942 | 5.41150759841622 |
| C21orf62 | 7.19342038860596 | 5.33823720172351 | 7.86542088505287 | 7.83448053097196 | 7.66552174992216 | 7.65885305368737 | 7.92480953509441 | 7.70164954862993 |
| TCEAL7 | 4.17880226769951 | 2.72972025039411 | 3.41427086388281 | 4.87556875370193 | 6.95191411730702 | 5.49976936642191 | 4.6370363461008 | 4.24263299044665 |
| OGN | 4.58791999769131 | 3.17922678268154 | 5.08978837249836 | 6.35810786292656 | 4.75926504402534 | 5.03320272593722 | 5.47206854916224 | 4.86671019967403 |
| SYT4 | 6.35896234116684 | 5.66737556837162 | 6.02191939811998 | 6.23310577491532 | 6.26560379552881 | 5.96527405748215 | 5.41009004949197 | 6.00384956032746 |
| LOC100506718 | 5.42689312960802 | 4.32156954061749 | 5.41110645130243 | 6.5577118199783 | 9.21576344125629 | 6.51801469611376 | 5.7992522686131 | 7.46313714773425 |
| GPRASP1 | 6.41434867340147 | 5.45102973305457 | 6.39563523838722 | 6.39946849081563 | 7.62219827852365 | 7.28455114772838 | 6.82279386981644 | 7.13900896082827 |
| NELL2 | 7.03224413552756 | 6.20127510299001 | 7.77354145645431 | 7.85834784075656 | 7.19708888482182 | 8.51277206152747 | 7.90564573421207 | 8.23433844869563 |
| AADACL2 | 4.63446548786401 | 2.37319438348988 | 4.7746974647984 | 4.16884257420067 | 3.75392538472808 | 5.56024111028746 | 4.21691266774266 | 4.15565210002931 |
| GHR | 4.57911375752055 | 3.28339288468769 | 3.86985167013245 | 4.09104814727475 | 7.18408189037026 | 6.26890967401314 | 4.75462565596929 | 4.39588539483069 |
| ADH1B | 6.10778514753031 | 2.98178325616302 | 5.96297464308405 | 6.23323474696767 | 6.49903823007057 | 6.12534424012559 | 6.6221429919727 | 6.00867848081673 |
| MGARP | 5.55690451301289 | 3.05336508941444 | 5.4375307103494 | 6.40470560977645 | 10.2700733563138 | 8.14028274637254 | 5.84918864135639 | 6.69005386167014 |
| IGFBP6 | 6.73530554015507 | 5.52613455799035 | 6.05391068090121 | 6.88182365936266 | 6.72625903795137 | 8.38111894851245 | 6.88102828377025 | 8.20998940270423 |
| GFPT2 | 6.69253878837796 | 5.00204087095387 | 6.78967709226078 | 6.82362199813287 | 6.18202879124183 | 6.53278915581453 | 7.65078609600393 | 6.7081044470133 |
| OLFML1 | 6.93449291252729 | 3.64640462245577 | 6.71823831360006 | 7.5901753272164 | 8.12222232394127 | 7.0954392216647 | 7.58127591651367 | 7.47622775299748 |
| NAP1L3 | 6.13761827901866 | 3.60856088854723 | 4.60037086233272 | 5.55080218380917 | 9.36284024632197 | 7.54435400696996 | 4.34676546259548 | 6.8855621629071 |
| HBB | 7.46216482040359 | 6.91301025414935 | 7.61230088874693 | 7.79048208852625 | 7.75561367625279 | 7.71097858274089 | 8.1588759879169 | 7.72303458837846 |
| DAPK1-IT1 | 5.67946602436322 | 2.83819745666039 | 5.84651838865321 | 6.12739391114964 | 5.49982038064707 | 5.09447678049351 | 5.41760613890703 | 5.36012193399509 |
| ALDH1A1 | 6.99434212155926 | 3.24625301579964 | 6.95934126983803 | 7.50734273636759 | 8.40075564944455 | 6.92681782090499 | 7.39613379494996 | 7.83702865668402 |
| LRRN4 | 6.52992633436253 | 4.34749912737065 | 7.50778671328109 | 7.50959292432746 | 6.75714328825291 | 6.7797193551434 | 7.56875038441645 | 7.59871505694673 |
| HAS1 | 5.73501302840296 | 3.19981680339286 | 5.9169112983217 | 5.77973511145371 | 5.94847469960111 | 5.98698653310229 | 6.1206111409755 | 6.10814177821423 |
| LXN | 10.2131892960321 | 6.36377557847967 | 9.25526467079968 | 9.63114066949379 | 8.94999883195211 | 9.75093304376649 | 9.43427376479348 | 9.48032167821117 |
| CLDN15 | 9.95511588078014 | 6.86592994641545 | 10.019147983771 | 9.75149133783138 | 8.45597649246356 | 9.1922878821716 | 9.57948754207789 | 9.22787702472982 |
| PDGFD | 6.73104472316226 | 5.92507916974611 | 7.4027784457657 | 7.35469457588868 | 7.16787471792143 | 7.2810115084767 | 8.35761578088552 | 7.59407822357949 |
| PRSS35 | 3.57130061672016 | 0.530799898222541 | 3.10312663725824 | 4.55971205517797 | 7.80387925377302 | 5.56899580965691 | 3.83268751643953 | 4.50639248385844 |
| HBA2 | 8.76074045936665 | 6.95322449091968 | 9.04323740400437 | 9.20615560741544 | 8.40210677133384 | 9.00759077529885 | 9.14231089188136 | 9.07932388369043 |
| WNT2B | 7.60492418658184 | 4.4858370352488 | 7.55992633822824 | 7.88890455388278 | 7.99159978918359 | 7.90835538945358 | 7.91867439282704 | 8.36340217548037 |
| CHRDL1 | 6.03360800705404 | 4.56785571053032 | 5.92163150799622 | 5.97036592626211 | 6.22026610027929 | 8.30175681682037 | 6.36003411867625 | 7.01732065979482 |
| LOC101930363 | 7.86122341261626 | 7.31286480806279 | 5.64468982661051 | 6.4629946066755 | 7.49462361487326 | 6.98761646987269 | 6.75983493397927 | 6.61392792709028 |
| PAPSS2 | 6.88247349827932 | 8.1345351600116 | 7.60215347331647 | 6.98907881811115 | 7.93642770240757 | 7.08804828690512 | 7.48832379806245 | 7.35938939057826 |
| FLNC | 7.19980973782165 | 5.82111577160833 | 6.61557225904537 | 6.85781930472638 | 7.12799432097639 | 7.56109697355281 | 7.23393598053065 | 7.23960807558671 |
| PLPP1 | 9.63055472514892 | 7.34050975140753 | 10.275257364298 | 9.68773784279652 | 8.40021790713286 | 9.78491697771336 | 9.953670474391 | 9.6678983327216 |
| AQP9 | 8.09573457921388 | 5.18910500824442 | 7.64645070648318 | 8.03317518912226 | 6.9273038981527 | 7.57694533088711 | 8.04639829132663 | 9.02249543040677 |
| TMEM255A | 3.56403666186661 | 3.23811731820066 | 3.6773052697166 | 4.26841193550867 | 3.9969039026898 | 4.40351996737765 | 3.33074481975078 | 3.21247595750893 |
| HOXC6 | 8.25371514325454 | 3.63126728954541 | 8.45690469060826 | 8.95451622744274 | 9.15004680319148 | 8.85152418830379 | 8.72142051153238 | 8.75481402971184 |
| LOC101926921 | 8.19381526502606 | 5.45307568207424 | 9.10988361653472 | 8.77299745950289 | 8.3809019234246 | 8.8021232458283 | 9.10791126734021 | 8.81724164426266 |
| PCOLCE2 | 5.98389198556789 | 4.04207520102617 | 4.75362592839662 | 4.64835039098842 | 6.01899462484446 | 4.87748905682879 | 5.01331932318634 | 4.62820783586419 |
| RNASE4 | 6.82676328668458 | 5.02143886231699 | 5.93585926243295 | 6.47644568710692 | 7.79517568057891 | 8.10305171172417 | 6.84339976587863 | 7.51188664031765 |
| TCF21 | 6.34999592954741 | 4.50248273105577 | 7.092089541851 | 7.22365374491448 | 8.18672833778604 | 7.06969840781693 | 7.50242250184951 | 7.37938313272269 |
| LOC101928635 | 8.00704240880327 | 5.77040806644885 | 8.05943964581074 | 10.0855766906306 | 7.81341149332324 | 8.27551904444711 | 8.44763498254367 | 8.57657693329149 |
| PKD2 | 5.3662312778743 | 5.65690246465436 | 4.93352070785831 | 5.72519309001229 | 6.54257844109116 | 5.03416728421053 | 4.67205189021801 | 5.37417355453336 |
| WNT5A | 8.06626413354009 | 5.62458054316361 | 7.21699315614881 | 7.03926453645304 | 10.747127210365 | 8.50310222189958 | 6.68744987227548 | 8.10351337581997 |
| FGF13 | 5.68801806025661 | 6.35860197481482 | 5.41718754078523 | 5.47638492811849 | 7.9242305586213 | 7.22442621762487 | 6.59277394686133 | 6.30078816329169 |
| LHX2 | 6.22694004070925 | 3.76297381265827 | 6.34754341885614 | 6.44793205828671 | 6.46512393769377 | 6.07865893125966 | 6.82268681546391 | 7.23034233340611 |
| ATP10D | 7.12520680285543 | 4.66435768000315 | 6.14908048103913 | 6.64596098840503 | 7.3649838218573 | 7.14438293199854 | 6.65106604628205 | 6.63934505029849 |
| ARHGAP18 | 8.47868658174685 | 7.11506966787194 | 7.52204737433464 | 8.08290940741132 | 9.31178985857557 | 8.30464002345781 | 7.98830219124838 | 8.05892074113532 |
| LOC286191 | 7.31894042808704 | 5.38180248316877 | 7.16998511248338 | 7.66229096483778 | 7.30145961271105 | 7.45526145492912 | 8.06909525994737 | 8.24766172934993 |
| EFEMP1 | 5.98070854434566 | 4.65998162590662 | 6.0607823827327 | 6.61397554632163 | 5.64067587247887 | 7.33852811144857 | 7.28921661454348 | 6.52000729616574 |
| LOC100996760 | 4.7067184056134 | 2.85478761500489 | 6.48174131914267 | 3.9666519490314 | 4.25894096810551 | 4.46928689909387 | 4.37259695069315 | 5.89520081466381 |

| **Gene** | **GSM461383** | **GSM461384** | **GSM461385** | **GSM461386** | **GSM461387** | **GSM461388** | **GSM461389** | **GSM461390** |
| --- | --- | --- | --- | --- | --- | --- | --- | --- |
| CD24 | 10.2890978554686 | 10.8877353182146 | 10.5430883859425 | 10.3366380287501 | 11.197363740357 | 10.6104060153155 | 10.2098133852184 | 9.43466106316897 |
| CLDN3 | 8.19642754186909 | 8.67956982530923 | 8.28426426063365 | 8.71338651493703 | 9.23333566315388 | 9.26908108271852 | 8.97259645198342 | 10.0102280668496 |
| C1orf106 | 8.61195800397597 | 9.71996373073486 | 8.83685513544203 | 7.29064556869481 | 9.52677894814307 | 8.98811090261015 | 8.89715267509539 | 11.0339666629638 |
| CRABP2 | 8.8878846812367 | 10.2042165400275 | 9.74867422680219 | 9.09860588766554 | 9.47482335455208 | 9.43325159022404 | 9.58029625988894 | 11.0844297303019 |
| SOX17 | 9.1453896006689 | 9.72932248777857 | 9.45686568545104 | 10.0561777404172 | 8.86373871598089 | 9.45938858305813 | 8.96405056661177 | 10.663454923817 |
| ELF3 | 7.79613481382408 | 9.18106195698724 | 8.72416479124616 | 8.18271381166474 | 9.22395583533314 | 8.58516286099358 | 8.84893063978616 | 10.1980479902962 |
| EPCAM | 9.99255602088035 | 11.4268884596516 | 10.7777238067363 | 10.7498359149277 | 10.7094026525634 | 10.4526222016659 | 10.4574116617109 | 13.2527585542272 |
| SCGB2A1 | 9.45396608822104 | 9.24401887915805 | 9.36275478762827 | 10.9430788640372 | 9.56924992894849 | 7.57929330689207 | 9.33572530691635 | 11.7934813862369 |
| KLK6 | 8.39205548115092 | 8.55034277420759 | 8.95600726807875 | 7.69741243344546 | 8.8292058088802 | 7.9268711788485 | 8.29216976217282 | 9.00980622813458 |
| MMP7 | 7.93498820178348 | 8.41934505848183 | 10.6242745662872 | 9.29061331760211 | 9.2641211835787 | 9.36344269602295 | 9.80811149447974 | 10.2414112001513 |
| CLDN4 | 8.68016785476827 | 8.75381343009367 | 8.52593770142453 | 8.84098400816663 | 8.93493661708549 | 8.9024700850148 | 8.84812996148521 | 8.98969535519064 |
| CKS2 | 9.17628038088157 | 10.6464687076566 | 9.50611117473195 | 9.91181289975544 | 9.38936245564388 | 9.57679798313728 | 9.42851720643348 | 11.835699109189 |
| CP | 8.82991376062825 | 9.98700281087811 | 9.22603159865737 | 9.85063966027725 | 10.2938069933494 | 9.0606743181168 | 9.31364493253723 | 7.48134132848849 |
| PSAT1 | 8.39010230257961 | 8.96618140394588 | 9.10365630435294 | 9.42646499861922 | 9.12462926823017 | 9.01888449668326 | 8.95287371865103 | 11.3966665867115 |
| MECOM | 8.33711082539562 | 8.93495813549802 | 8.88787895573744 | 9.11550924420075 | 8.97417656851275 | 9.00967944254511 | 8.67749294984175 | 9.61421950210634 |
| ESRP1 | 9.03966208753358 | 9.75057970861644 | 9.46351824282597 | 9.60954075190913 | 9.62422246698466 | 9.42046134833533 | 9.28952672564162 | 10.9656652574113 |
| WFDC2 | 8.43552900532295 | 10.3081490096829 | 9.42838271751726 | 9.9893968657775 | 9.82833486096182 | 8.87995719915813 | 9.14839099159723 | 10.5798710015277 |
| CEP55 | 8.54198713202207 | 8.88706521650359 | 8.81823064749319 | 9.58384059463811 | 8.62452498229251 | 9.45551422420802 | 9.27601503553691 | 9.60412508263356 |
| MUC1 | 10.4185775474159 | 11.4476022689681 | 10.8352369659006 | 10.5429489818475 | 10.908601779128 | 10.6498151210119 | 10.6493741511917 | 11.583344197023 |
| MCM2 | 8.89209954292607 | 9.74889054264592 | 9.25975032417126 | 9.23196993954061 | 8.9017689647984 | 9.33363393253276 | 9.28363938970224 | 11.7425620750901 |
| FAM83D | 8.00110414076571 | 9.11846095942223 | 8.73021537159963 | 8.94420545512557 | 8.52086614683977 | 9.11943399580398 | 8.85799343210018 | 10.6836350542567 |
| ZWINT | 8.38691007662864 | 10.0368192458456 | 9.11255940057444 | 9.86126063945314 | 9.37708686551362 | 9.7424155498552 | 9.56770515010987 | 10.7204067340569 |
| NEK2 | 7.13953293489773 | 7.41486532364004 | 7.77265536933923 | 8.54796740277654 | 7.24037253212625 | 8.13194233682649 | 7.94594561969249 | 8.30125725026467 |
| BUB1B | 8.65840073478669 | 9.16322699375966 | 9.1295612241623 | 9.18445139599896 | 8.76259796999437 | 9.13639135929958 | 9.0134678429809 | 11.3713138188677 |
| DLGAP5 | 7.60867620113798 | 9.22300978202586 | 8.48005503691649 | 9.26250832736125 | 8.16528388832245 | 8.87502436667282 | 8.85612046052872 | 9.123999789387 |
| MELK | 8.28048777003646 | 10.2167822282001 | 9.24652209973601 | 9.61142323605342 | 9.29081372342703 | 9.1250853718168 | 9.43735884013203 | 10.5465183072012 |
| FZD10 | 8.0555698611427 | 7.37152401448479 | 7.68819434896751 | 8.68889719095249 | 5.10322905018109 | 8.37982453707919 | 8.77628168135461 | 8.80243558486191 |
| LPAR3 | 8.91396497014289 | 9.02475183781084 | 9.11595399095779 | 9.15824486617964 | 8.76438563574369 | 8.73648480356525 | 8.89406439496377 | 8.36541040520906 |
| ITLN1 | 6.86516412132824 | 6.82950710740627 | 6.46692887340124 | 6.56424858848718 | 6.90104788804386 | 6.19294372998599 | 6.83851062398525 | 8.49890503884616 |
| LINC01105 | 5.52699837417179 | 4.96222972537979 | 5.27580168949462 | 5.20440161028541 | 5.21153013084962 | 5.36142331686889 | 5.3036273395357 | 5.75025543491292 |
| ANXA8L1 | 8.47039044070953 | 8.38732807236612 | 8.52537594506103 | 8.75708993759916 | 8.63472031178112 | 8.53565252790901 | 8.4734784717397 | 11.4140086487369 |
| DFNA5 | 7.8426269120303 | 7.94902709903387 | 8.41872967673653 | 8.0800553488773 | 7.36280299571888 | 7.75080076254135 | 8.09104920544656 | 7.47230092385726 |
| PRG4 | 5.46226504171915 | 6.01649854847678 | 6.2241927342005 | 5.3238744197187 | 5.42404868442908 | 6.23006848469869 | 6.3743822470786 | 4.07958291575269 |
| ABCA8 | 6.20312218579075 | 5.52618987650369 | 6.27635397098211 | 5.17489640897282 | 5.16192798055823 | 5.20986401906162 | 5.3600470102998 | 4.85194723286622 |
| PROCR | 6.07098603367262 | 6.02850285034971 | 7.03310359094348 | 5.93890677936991 | 5.35288561669553 | 5.71348962227386 | 5.46215704784739 | 8.55752114020387 |
| CHGB | 6.4432668222968 | 5.55008799661628 | 5.60697218499549 | 5.56291094700703 | 5.29466853163034 | 4.74002626885452 | 4.93993646481783 | 5.62799488957822 |
| AOX1 | 8.62052409758257 | 7.53661634295032 | 8.03969224211098 | 7.84366263031797 | 7.93610021408053 | 8.16185997672426 | 7.91104887626278 | 7.28645149032509 |
| CALB2 | 8.7887672644228 | 8.49259829627406 | 8.64614825318183 | 8.62282422344693 | 8.53304934327135 | 8.9735883171089 | 8.44646302341689 | 7.72215176689501 |
| HAND2-AS1 | 5.69533270472867 | 4.51061385875414 | 5.44005189333338 | 4.96412827484222 | 5.38619015062376 | 5.05078028395287 | 5.00711923752378 | 4.22533277843606 |
| BNC1 | 6.8728656881162 | 6.32882479828149 | 6.21970192853106 | 5.56520141615917 | 5.89439701693632 | 5.87160465771297 | 5.6101050166909 | 7.97518277094414 |
| BCHE | 5.75216251129943 | 6.43122679929641 | 8.4343613460671 | 4.99897171341275 | 6.13949609919024 | 6.29393875350273 | 5.60738654076833 | 6.39522907013901 |
| CLEC4M | 6.45107755330945 | 5.99323732107349 | 6.27486638532829 | 5.89415688187834 | 5.89879846921 | 6.12965188751612 | 5.96452801609107 | 7.08996417182337 |
| NPY1R | 4.61129633787674 | 6.25418962662843 | 6.19534956706411 | 5.34124927261059 | 6.4201909905899 | 6.91382289480533 | 5.49185630231509 | 5.94209453785756 |
| TCEAL2 | 7.173167418931 | 7.36630472692721 | 7.95731683328448 | 6.71337964085256 | 6.13467273818569 | 7.07221301223991 | 6.84631779494228 | 6.2023354362415 |
| MNDA | 6.9327226329752 | 6.59506796956336 | 7.75432634497104 | 5.3794234235101 | 5.69113491194174 | 6.31866933653059 | 6.53954658023841 | 6.78871180833409 |
| PDE8B | 6.2908359828804 | 5.34342086334922 | 6.04760818364211 | 5.50389355499181 | 5.38470260295929 | 5.49937075567917 | 5.37560016571377 | 5.37120570758341 |
| REEP1 | 8.53965300463566 | 8.15983072888144 | 8.22136671282492 | 8.48490524533418 | 8.36419047900167 | 8.49785782322517 | 8.24248484870303 | 6.72869263413801 |
| ADH1C | 5.82849195600703 | 5.27273987811746 | 5.46545212740898 | 5.22401325431249 | 5.21836658520994 | 5.91653396892959 | 5.06585231063203 | 5.30968552377362 |
| SPOCK1 | 6.38648678641023 | 7.27033270755966 | 8.81109527976827 | 5.83534556688763 | 6.62285423269654 | 9.00927438169218 | 8.92545355895554 | 5.22829537819468 |
| KDR | 6.58194320919727 | 8.05626920509384 | 7.74981580707252 | 6.90057703259663 | 7.41152793587189 | 7.82657390900598 | 7.4552367921404 | 7.67037299283895 |
| GADL1 | 4.84392356305188 | 4.54463375313963 | 4.76221591572778 | 4.74427413814103 | 5.00573232627613 | 5.42708987446954 | 4.83752954274477 | 4.95358652653522 |
| SFRP1 | 6.88697014064859 | 6.35022494805965 | 7.1454706133254 | 6.41683045487132 | 6.27912070118301 | 6.87287645877436 | 7.20280606459403 | 5.33426656239969 |
| BAMBI | 7.64788289770741 | 6.92891508035272 | 7.14590158531945 | 7.15831682800239 | 6.36203848859838 | 7.35973199315247 | 7.529172837292 | 6.31148495088171 |
| LGALS2 | 7.00615213105772 | 5.38268454285046 | 5.35313623687177 | 5.10065813442336 | 5.41272056510519 | 4.75337989990246 | 5.19248220200379 | 5.59432161774832 |
| DIRAS3 | 6.21931762351958 | 5.40023050442203 | 5.40014851331387 | 5.58590895881913 | 4.24750983073791 | 5.85845103813805 | 5.87208259972201 | 4.35417002602486 |
| C21orf62 | 7.98162150681032 | 7.7072728439119 | 7.85103563660029 | 7.84410942136841 | 7.53991486439893 | 8.02407029801886 | 7.83071008836629 | 6.74157215099163 |
| TCEAL7 | 6.43239156832604 | 5.27935242812847 | 6.42063398020278 | 4.47104435459307 | 4.50283339490809 | 5.52439910350819 | 4.81300641627688 | 4.41586005176066 |
| OGN | 7.59146138370355 | 5.3279100738093 | 6.81888825837601 | 4.99173270789725 | 5.7699911941271 | 5.57719767617727 | 5.38263958814536 | 4.36420120571773 |
| SYT4 | 6.26441444980482 | 6.11302741227385 | 6.05759323487911 | 6.19244866643957 | 6.02922095811425 | 6.6650658307647 | 6.12708845219075 | 5.40523678850886 |
| LOC100506718 | 7.30483894204975 | 6.94587725869342 | 7.48695137349357 | 6.32368410209671 | 6.034807764503 | 6.73916132683637 | 6.40954028977553 | 6.20725450524563 |
| GPRASP1 | 7.84261434187968 | 6.6297383737091 | 6.973553878808 | 7.42358657435341 | 6.60730515884755 | 7.60835093683142 | 7.75518135455822 | 5.61121960333138 |
| NELL2 | 7.89817811461972 | 7.50846826905297 | 8.23578927663452 | 8.36312726282903 | 7.47813861835999 | 8.66386760114926 | 8.09439443663356 | 6.35635160533661 |
| AADACL2 | 4.63783047050377 | 4.7099743199741 | 4.23359667014371 | 4.38766582786638 | 4.80841079444926 | 5.49439000777385 | 4.93271790932448 | 2.76563445860373 |
| GHR | 5.84637546849085 | 5.35469193157778 | 7.05166574467985 | 4.49031981911254 | 4.75615865096065 | 6.18065511866599 | 5.51938778914223 | 8.23090908313649 |
| ADH1B | 6.15694565368905 | 6.15564552310316 | 6.7906606260223 | 6.16602094067571 | 6.54374293617021 | 6.46028018194085 | 6.56160299306852 | 6.19752521498462 |
| MGARP | 7.67349282415879 | 6.78344355794059 | 8.01613970265525 | 7.00093519439078 | 6.48857606256119 | 5.90209287944975 | 6.16630370402985 | 5.83018939523042 |
| IGFBP6 | 7.97198606583249 | 7.32796574584618 | 7.60001695044395 | 6.75467375373121 | 6.7541526092142 | 7.2662899433069 | 7.00373714574386 | 6.59165847520842 |
| GFPT2 | 7.25527411403529 | 6.67395209328901 | 7.5211842554158 | 5.97303950235645 | 6.250785393345 | 7.52832126339897 | 7.03707467201071 | 7.2677604994228 |
| OLFML1 | 7.57962518807553 | 7.27453190827078 | 8.22483616939943 | 6.63646366769683 | 7.21185909974725 | 7.8775970286579 | 7.81888889730787 | 7.20163386116965 |
| NAP1L3 | 7.22242784421731 | 6.27582094201645 | 8.0966308301223 | 6.89714359715496 | 5.56531080171176 | 8.03013188813947 | 6.39878301820035 | 4.96231765494231 |
| HBB | 9.33247074653515 | 7.86158013030164 | 7.54960160056504 | 7.59155600594572 | 7.85233755343277 | 7.80929385016225 | 7.87981142855356 | 7.60997652553183 |
| DAPK1-IT1 | 5.46057876077603 | 5.77909684320227 | 5.85721218209344 | 5.42276112956792 | 6.62112145725058 | 5.76713567359476 | 5.98486045677361 | 5.20269980709445 |
| ALDH1A1 | 7.52999268571596 | 6.52856506801215 | 7.67630267396442 | 6.94335876267781 | 6.63203841310906 | 7.69010276386341 | 7.49839449152197 | 5.57607160328582 |
| LRRN4 | 8.23777401953721 | 7.03221658040967 | 7.39992728488965 | 7.32738647196994 | 7.15312131218233 | 7.80151113670266 | 7.36534259782577 | 6.6644679070284 |
| HAS1 | 7.3685675728626 | 5.96401965548288 | 5.98508596026697 | 5.806233821676 | 6.06076941540617 | 6.36922915580324 | 6.33522418953525 | 5.86190823269107 |
| LXN | 9.59633140916816 | 10.1245478521408 | 9.83478230985833 | 9.71017102592915 | 9.96572946120888 | 10.1231773046786 | 9.40537550971788 | 8.93201095874658 |
| CLDN15 | 9.50519425797175 | 9.24748609513503 | 9.29188323541008 | 9.25351897156687 | 9.02641969753554 | 9.05867366128229 | 9.32121446063366 | 10.5799763144407 |
| PDGFD | 8.26016918417772 | 7.5318492857512 | 8.72663200185342 | 7.390527542829 | 7.88187259123331 | 8.07323380508466 | 7.83256094092634 | 10.0457898935117 |
| PRSS35 | 5.62609740529679 | 3.83690372349356 | 4.59170933316174 | 4.80692720263036 | 4.29068242620368 | 4.69789611435203 | 4.08414932684686 | 4.42092698603535 |
| HBA2 | 9.8433709750727 | 9.07462495757924 | 9.10909279802516 | 9.09637167840308 | 9.12508321955323 | 9.19588562121985 | 9.18967468126626 | 7.99527439132427 |
| WNT2B | 8.181730088991 | 8.17026058937974 | 7.77994895352365 | 8.15873211645707 | 8.21672294462152 | 7.98466553299316 | 7.76586455277227 | 7.80246628189327 |
| CHRDL1 | 6.65989602380372 | 6.68408935275804 | 6.94379242503936 | 8.20478630983657 | 5.84047330500396 | 6.76822403143347 | 6.74187142364368 | 9.50632345115441 |
| LOC101930363 | 7.3900485474166 | 7.78035603565413 | 6.82499691497493 | 7.75650295015961 | 7.16670540390252 | 6.90814038981133 | 6.82648493104337 | 12.4923314106983 |
| PAPSS2 | 8.08640677863802 | 7.67084056951522 | 7.9643581973585 | 7.29942662279294 | 7.52480156870736 | 7.98314372862447 | 7.69948130470035 | 6.13455364142468 |
| FLNC | 7.26698325842457 | 7.46845298636481 | 8.01622329273055 | 7.30075522312682 | 6.88341309625385 | 7.27363710381568 | 7.27622678645075 | 6.94506921377727 |
| PLPP1 | 9.99711101482236 | 9.74900287993914 | 10.0071618560716 | 9.83119480105817 | 9.69991248324083 | 9.71978067420329 | 9.81916680583656 | 9.02155606874346 |
| AQP9 | 8.75802662163887 | 7.6641485810867 | 7.8763266210485 | 7.54864469070715 | 7.59643577618128 | 8.21613470498346 | 8.26504770147529 | 11.5045161189635 |
| TMEM255A | 5.8926265982939 | 5.54309370396995 | 5.20567401751351 | 3.68751985824822 | 4.24140547951066 | 3.8425766307707 | 4.54955212410935 | 8.75926570991599 |
| HOXC6 | 9.03577509888777 | 8.81257202679538 | 8.9784387664707 | 9.01685006396511 | 9.16781702722633 | 9.06235920501235 | 9.01013363606166 | 7.1103528023268 |
| LOC101926921 | 9.22237470956986 | 8.65737883604798 | 9.36588500484916 | 8.72631683493574 | 8.55087553343807 | 8.99585023415476 | 9.21971943036417 | 7.59428777647092 |
| PCOLCE2 | 5.0368197951977 | 5.09283746456149 | 5.48721620462255 | 6.21419670511898 | 5.12388549723928 | 5.3323857076992 | 5.684588740618 | 4.69842964309159 |
| RNASE4 | 7.7922599616823 | 7.13252543443365 | 7.7813629923733 | 7.76685252627363 | 5.96107457386427 | 7.23258881209213 | 6.95348642288011 | 9.55924419201954 |
| TCF21 | 8.21172284954091 | 6.89385726341505 | 7.15319226306818 | 7.04226074226297 | 7.00975920961316 | 7.45345502376123 | 7.40058318386754 | 5.96449336083028 |
| LOC101928635 | 8.44456354498855 | 8.06925372481503 | 8.67715936555717 | 8.32774573897715 | 8.18688776248977 | 8.37703913237564 | 8.57901982468187 | 8.00152642016649 |
| PKD2 | 5.4340210004483 | 6.54788626104673 | 7.32443260235957 | 6.28343474350417 | 5.92528263871236 | 6.63513185536052 | 6.18063522957434 | 6.5393852809404 |
| WNT5A | 8.37873052521416 | 7.05163312063575 | 7.06227284840681 | 8.99530643228382 | 4.71205920940986 | 7.62989206659003 | 7.42040660708819 | 8.6645983907175 |
| FGF13 | 7.19420527512194 | 7.65911823867864 | 6.40599916482507 | 6.40857770588884 | 5.8715948015724 | 8.2913825400231 | 6.09059729547962 | 4.92674904553339 |
| LHX2 | 6.7201655792342 | 6.47040427031456 | 6.19035410862746 | 6.37636245376842 | 6.22539351693452 | 6.43011713835285 | 6.4935056383284 | 5.73219320904806 |
| ATP10D | 7.17556452015688 | 7.16537936963818 | 7.67345042271354 | 7.41979167807651 | 5.85618646031999 | 6.9583207056141 | 6.61372022818006 | 7.65212075548559 |
| ARHGAP18 | 8.15752159953353 | 8.31502302986127 | 8.53040945854541 | 8.03702798458392 | 8.39519721879994 | 8.12758324259566 | 8.08759685184814 | 9.26981754124892 |
| LOC286191 | 8.32487359396952 | 8.59399608744652 | 7.90479114972756 | 7.90278510121076 | 8.65551999010859 | 8.24627031013237 | 8.21595519017179 | 8.4248591200488 |
| EFEMP1 | 7.93756607059031 | 7.20578640848997 | 8.75163610746026 | 5.46576555235935 | 7.25503203606059 | 7.61581082808667 | 7.10707057509388 | 10.6509948974018 |
| LOC100996760 | 5.09961922721915 | 5.37466045685422 | 5.04836698500387 | 4.30903062978875 | 4.38317895217585 | 5.16032727742267 | 4.40746152706114 | 8.85567208013557 |

| **Gene** | **GSM461391** | **GSM461392** | **GSM461393** | **GSM461394** | **GSM461395** | **GSM461396** | **GSM461397** | **GSM461398** |
| --- | --- | --- | --- | --- | --- | --- | --- | --- |
| CD24 | 11.8720931964919 | 12.7687561744537 | 13.1011114688758 | 12.7442077071486 | 12.856520849178 | 12.3359700053888 | 12.2938161876452 | 13.2515876896389 |
| CLDN3 | 10.9878793359588 | 11.7872271580252 | 11.7834812098267 | 10.2900148138338 | 11.4492286208881 | 10.6247895169514 | 11.8562134664395 | 11.8857364052838 |
| C1orf106 | 9.98729243928096 | 9.58660713697376 | 11.3959892569799 | 10.136927047823 | 9.96925699677134 | 10.1224656581792 | 10.4119663925354 | 11.8832847836446 |
| CRABP2 | 11.1510546042223 | 11.9132970943671 | 12.5453047875528 | 11.6303535931162 | 11.2394075892309 | 12.3741320298115 | 12.3436493246906 | 11.69266780389 |
| SOX17 | 11.0781674900508 | 11.6923583216509 | 11.5430003939151 | 11.0274740907376 | 10.734344667049 | 11.2143434083916 | 11.8217719892965 | 10.3608745115813 |
| ELF3 | 10.8579213995536 | 10.2912037059185 | 10.1469797248073 | 7.80501723501365 | 9.95661283566225 | 9.65786267084705 | 9.50522403715139 | 10.7601505177058 |
| EPCAM | 12.4715812329569 | 13.3487834712319 | 13.3365762939641 | 13.2920052176147 | 13.4094704943323 | 12.6974519644606 | 13.147759823251 | 13.0605084907316 |
| SCGB2A1 | 11.5630055530624 | 12.4115162842397 | 12.0192084608238 | 9.60572581082474 | 12.4059524851094 | 12.3299224424156 | 13.1423081268911 | 12.3388784169856 |
| KLK6 | 11.0865409722825 | 7.43944860743925 | 12.546392901175 | 11.3268732386057 | 9.97650684406324 | 10.9090155023589 | 12.0404438468782 | 10.7983259851381 |
| MMP7 | 12.392690392813 | 10.1787644296261 | 11.743816193708 | 7.87798958538721 | 9.14111087085182 | 11.5660873453898 | 9.52555800156786 | 11.7058440247028 |
| CLDN4 | 8.97281325643082 | 8.72564744098471 | 9.20445499039644 | 8.44171585375419 | 9.09621704227476 | 7.98898852951697 | 9.31323337873514 | 9.87924397729066 |
| CKS2 | 11.4712331943307 | 12.3760765387299 | 12.2208770777733 | 12.5959730560223 | 12.1605647734853 | 12.6170151172966 | 11.917230339289 | 11.9412860789436 |
| CP | 10.9957897590461 | 10.9274350220425 | 9.53557768871637 | 9.35933063484897 | 10.8984296367682 | 11.7255057912027 | 12.2356851816373 | 12.6038158253441 |
| PSAT1 | 9.2176257550269 | 10.4567409645163 | 11.0084034097039 | 10.8108431186189 | 11.5911169699215 | 11.8462041650368 | 10.6769478840612 | 10.6674983383358 |
| MECOM | 10.2485852134595 | 10.7207233895013 | 9.83214173847404 | 8.48558356682768 | 10.7321820815386 | 10.1473064952398 | 8.81104151050179 | 10.622257773273 |
| ESRP1 | 10.5905514966809 | 11.4844780358456 | 11.6431089507673 | 11.1679794331803 | 10.9087581272711 | 11.5424786166428 | 11.4509972679696 | 11.4254283572887 |
| WFDC2 | 11.1543487980628 | 11.7436635272788 | 10.8201949213429 | 10.5858291413549 | 10.8116074431823 | 10.7973294246224 | 11.7728766947802 | 11.8860080849389 |
| CEP55 | 10.5326773542758 | 9.87061593626941 | 9.18768363224316 | 10.3498009256728 | 10.7183958777508 | 10.4786179617108 | 9.05990142017832 | 9.99160687471186 |
| MUC1 | 11.6074203254017 | 11.9838657708405 | 12.3433392504567 | 9.36639573080041 | 10.9296502261716 | 12.0586572028255 | 11.6136614852094 | 12.2218110396999 |
| MCM2 | 11.2427513500071 | 12.4716371145481 | 12.0600068397369 | 11.4249903006181 | 12.0616614577336 | 12.2802284978672 | 11.729871366681 | 11.1276332797259 |
| FAM83D | 10.655816908292 | 11.2302006111788 | 10.3132004947164 | 11.2324808883174 | 10.2435429424469 | 11.4956551937903 | 10.8386839462383 | 10.6428910647165 |
| ZWINT | 11.1343107973096 | 11.9075892318316 | 11.1645361516507 | 12.191962929815 | 11.2240861104001 | 11.9949438309208 | 11.533281057563 | 11.3895076590209 |
| NEK2 | 9.03535984048341 | 10.080562802175 | 8.46729782383253 | 9.84991968768786 | 9.28020459840013 | 9.6933374530931 | 9.49139927733195 | 8.7107661478577 |
| BUB1B | 10.5393430144406 | 11.5120787055256 | 11.0454183970308 | 11.379589556968 | 11.4359358590396 | 10.8550085951871 | 10.3731370358021 | 10.9544362548293 |
| DLGAP5 | 9.91399039267484 | 10.4343467495574 | 9.67037830440583 | 10.0618976768973 | 9.40379602288407 | 9.83383884355829 | 8.7384807551526 | 10.1624920369375 |
| MELK | 10.4623897973026 | 11.3056285879995 | 9.81880583379336 | 11.0069010781357 | 11.0055824465842 | 10.96560393651 | 9.97906787148051 | 11.4861612714577 |
| FZD10 | 9.34888967392836 | 10.5376940425602 | 9.34126306272676 | 9.30656529125973 | 9.92948774192772 | 10.690984465421 | 12.1992060925334 | 4.45551792294186 |
| LPAR3 | 9.79201099601095 | 11.9182308018032 | 11.1196116662497 | 9.87285107066579 | 8.11069731654493 | 10.8514808532076 | 10.3123991403361 | 10.5992313052877 |
| ITLN1 | 6.2697475824765 | 6.38601938492375 | 6.93353723137103 | 6.93351362629493 | 6.70574296094741 | 6.59679951075494 | 6.83919118808523 | 6.86877317827089 |
| LINC01105 | 5.13312371289768 | 4.93444417631023 | 5.07598308215429 | 4.41780749534876 | 4.97632697211465 | 5.00398894224728 | 4.83044634892977 | 5.0378331914018 |
| ANXA8L1 | 7.68595416056753 | 8.31752115100171 | 9.02872660687269 | 7.55773172886312 | 8.13923924630988 | 7.75962857459847 | 7.51822825039615 | 7.23589934593275 |
| DFNA5 | 9.58134748072944 | 8.69401306192615 | 8.805331153983 | 9.48661181384474 | 9.19012344247268 | 8.05130140097054 | 8.53658526219078 | 7.92532893161105 |
| PRG4 | 4.05046687035066 | 3.91883462155197 | 5.92897191274606 | 3.91114507560162 | 4.60051953890798 | 4.02679120842674 | 4.65588415356182 | 4.76300781833394 |
| ABCA8 | 5.07715039169032 | 6.27365327114381 | 5.91326522604797 | 5.27008784382899 | 5.15418755910278 | 5.8727376649926 | 5.4392186276144 | 5.35604518512295 |
| PROCR | 7.64620586822325 | 7.62395462859252 | 7.4480336862913 | 6.4882466638053 | 7.6631311029195 | 6.59182151348456 | 6.13511413180728 | 6.11498120574274 |
| CHGB | 7.51553427361562 | 6.16261891923662 | 4.67899020377773 | 5.31954206933526 | 4.30478115678739 | 4.83295075794029 | 5.23799958131524 | 4.74188220708496 |
| AOX1 | 6.36891934932072 | 6.93771514161771 | 7.025549329159 | 5.93429003069855 | 7.86990532687472 | 6.70387589557646 | 6.19993632406213 | 6.22208871494668 |
| CALB2 | 7.81464654866029 | 7.89456921039972 | 7.34762136856813 | 6.90757571305043 | 7.05489187872065 | 7.92806232568588 | 7.54209550522503 | 6.75161100394148 |
| HAND2-AS1 | 4.46137466903304 | 4.2849915472138 | 4.79755777776096 | 4.54445354718293 | 4.65219391079 | 4.27040933576144 | 4.39499011438132 | 4.43342687159321 |
| BNC1 | 5.93256083913091 | 4.93960178012174 | 5.71479226417145 | 5.07669590183038 | 6.79366182868012 | 7.99537314666224 | 5.96207352149368 | 5.44347570239382 |
| BCHE | 5.40742413626332 | 5.45766323385525 | 7.26041150269404 | 5.98972714001557 | 4.44824683397345 | 7.34671760193064 | 4.44691125001803 | 6.04380161838049 |
| CLEC4M | 5.60394229397989 | 5.56729292957653 | 5.68461118095757 | 5.50722061875961 | 5.36636068560062 | 5.68913139554461 | 9.93167493242323 | 5.50361269622205 |
| NPY1R | 6.45562148363977 | 6.34124571384953 | 5.23200448826047 | 4.01000995735522 | 4.19478836687079 | 9.11549369040628 | 4.6158046990906 | 8.17703576495274 |
| TCEAL2 | 8.93593113975227 | 7.84236920204925 | 7.10415840886372 | 7.78159577158167 | 5.99186193055632 | 7.46917780120286 | 7.36497507010922 | 5.76026885805237 |
| MNDA | 6.41735634496405 | 7.66699086880845 | 7.2225341076417 | 5.24463974051662 | 6.88567197237125 | 7.22621949944792 | 6.14589343574316 | 6.58687430717012 |
| PDE8B | 5.17632277264046 | 5.09241042968444 | 5.12916347440332 | 5.04538180870112 | 4.99722916977414 | 5.03995867153456 | 5.13007422122834 | 5.49391307585297 |
| REEP1 | 7.11724309087869 | 7.59599216422329 | 6.75045777953476 | 6.68826919519919 | 6.39462560491141 | 6.72596604891571 | 6.36303086670649 | 6.76284176739692 |
| ADH1C | 4.92858825063694 | 4.84437058718622 | 4.68304512977574 | 4.33654761968806 | 4.48697817806566 | 4.61040478489906 | 4.72507581491686 | 5.40825330456822 |
| SPOCK1 | 8.4379434481573 | 6.49419477282671 | 7.57267749178355 | 9.72644127436962 | 6.59369139621753 | 7.11949106023016 | 10.7848147622914 | 5.72152031214106 |
| KDR | 7.03444684150596 | 7.62751929329872 | 8.04128679519151 | 8.59447763719665 | 7.30172481316556 | 7.94802257905404 | 7.26825659096809 | 7.68706068833989 |
| GADL1 | 4.83132498044874 | 4.82065382457067 | 4.29955239209883 | 4.75913452352411 | 4.68030184972554 | 4.7560625527967 | 4.6128183798112 | 5.19027903504083 |
| SFRP1 | 7.83222324641363 | 6.41161224851553 | 5.80690864807474 | 8.0336309934337 | 9.14080657757063 | 5.96276647499787 | 5.36429279549033 | 5.60764270108642 |
| BAMBI | 7.60915657108245 | 7.73162451057232 | 7.38156890648407 | 8.62616897113693 | 5.90944670906303 | 5.85013181724079 | 7.2064674082534 | 6.14756110196932 |
| LGALS2 | 5.37959670439288 | 5.28714349931149 | 5.42589564596641 | 4.80146910225368 | 4.96868983005784 | 5.55083603735561 | 7.47094352153209 | 5.32174413954225 |
| DIRAS3 | 6.85830432157564 | 7.51635402703602 | 6.7517448843277 | 6.38665404830334 | 5.29865831556452 | 4.85081442195631 | 7.81951491455063 | 3.78793389360408 |
| C21orf62 | 7.7678391617179 | 6.75771934963527 | 6.62398753974345 | 6.63629617066916 | 6.7091479309051 | 6.68441341344854 | 6.43516601080267 | 6.96869213372387 |
| TCEAL7 | 5.97137800812972 | 5.63636650728732 | 6.16581146920892 | 4.03464712090489 | 4.35165659479456 | 6.13398266179189 | 4.88161078641148 | 4.43812647955095 |
| OGN | 4.45306975406888 | 7.34468382974705 | 9.58282034995093 | 3.88662818145682 | 4.43536856550632 | 6.51301376886986 | 4.32636476664075 | 5.50452505698224 |
| SYT4 | 5.31927109081806 | 5.42661699769579 | 5.61921637277195 | 5.11844278983545 | 5.68736868429355 | 5.72468301028074 | 5.58580683132451 | 5.11936862832404 |
| LOC100506718 | 5.85380938681525 | 7.44698621927548 | 8.05174675786537 | 6.11189585629925 | 5.87377383370088 | 6.35980243621268 | 6.10770878991444 | 6.34014741675947 |
| GPRASP1 | 6.26833520113943 | 6.73506178448043 | 7.02751901496903 | 5.7498372554414 | 5.87259239422811 | 6.09409246893052 | 5.97260535452933 | 5.91558782342299 |
| NELL2 | 9.27719439503486 | 9.71784604113423 | 8.91116425476518 | 10.0339047371913 | 6.53508093022373 | 9.85714591810519 | 9.06543767732546 | 7.94858332761235 |
| AADACL2 | 5.27240397445176 | 3.5931864229933 | 4.85248331745519 | 4.3951107971283 | 3.85735403279433 | 3.97440082247106 | 3.61607534157141 | 4.06765592449031 |
| GHR | 7.45336118549377 | 7.74160181141324 | 7.56437816856506 | 6.54789551259085 | 5.17661798422943 | 6.74403996870057 | 5.25115099059394 | 5.35085787576765 |
| ADH1B | 6.07961971350408 | 6.27446528310541 | 6.27940851995793 | 6.16093742734829 | 6.09941303926041 | 6.05955969973531 | 6.01151348456455 | 6.55148679429816 |
| MGARP | 5.34510891489134 | 9.77292979464177 | 8.70154559158764 | 7.97312333067025 | 5.53128475771593 | 6.91225465027496 | 6.86925452711547 | 6.53645083019471 |
| IGFBP6 | 9.83346571177975 | 6.89344715834103 | 9.32066969648578 | 7.77152248273937 | 7.42893797255948 | 7.90944910929635 | 8.15221384677918 | 7.23888237384058 |
| GFPT2 | 6.43688307316814 | 6.21503591841946 | 7.35253785321158 | 6.47107850612892 | 6.34718904889279 | 7.0852015549738 | 6.47376905636723 | 6.19915994990144 |
| OLFML1 | 7.42347732670428 | 7.39579116290658 | 8.79110426770101 | 7.02516171481539 | 8.5680511114842 | 7.84078421668947 | 6.61541924009407 | 6.85284781910884 |
| NAP1L3 | 7.46372870653983 | 8.539422505456 | 8.05169293081973 | 6.90793617053803 | 8.20259892867815 | 8.71101989545445 | 7.92187068305733 | 5.21214129139052 |
| HBB | 7.82175325802555 | 7.65304747374558 | 7.14337913208826 | 7.2410962928135 | 7.27919036249412 | 8.14530807390641 | 7.31281898531244 | 7.63160998118213 |
| DAPK1-IT1 | 4.90918746035695 | 4.97665691113976 | 5.21300114895133 | 5.47980289436205 | 5.39389322145449 | 5.42811223399423 | 5.00748706142372 | 5.78610492554058 |
| ALDH1A1 | 5.40482820684355 | 8.23168200136247 | 6.45478621099397 | 8.9637746541376 | 8.28227298838181 | 5.64774333958472 | 10.4849940342554 | 7.04752748300854 |
| LRRN4 | 6.16614098375387 | 5.93495636687348 | 6.11744570746605 | 7.18573277274244 | 6.0865003699773 | 6.33581640046952 | 5.81138496976523 | 6.07575830201995 |
| HAS1 | 5.90535330663822 | 5.97271332942199 | 6.62301817464965 | 5.60765876692106 | 5.80717972702273 | 5.82981912291939 | 5.82225851859707 | 5.61956267217398 |
| LXN | 9.89835802072698 | 9.53071259684333 | 9.71714688080165 | 8.45618600528866 | 9.18160201931348 | 10.1847885802884 | 9.52718374555712 | 9.23900892048694 |
| CLDN15 | 9.02881264721078 | 8.03550487148285 | 8.43423664541142 | 8.14964983590773 | 8.01416445358264 | 8.2368699849339 | 8.44234286975667 | 8.06408525249523 |
| PDGFD | 7.01631245013955 | 6.59934532010462 | 8.29292067554316 | 6.99001884659497 | 6.79464784865725 | 7.74156810634144 | 6.06593845325067 | 8.18893495209852 |
| PRSS35 | 3.65374794290996 | 5.85879414743871 | 6.06166604750293 | 5.47601221700258 | 3.39788508637742 | 4.68879580702463 | 3.29853955224308 | 4.02277614890906 |
| HBA2 | 9.19546038567407 | 8.29798770147755 | 7.81795575528411 | 8.1788034277195 | 7.95813990349948 | 8.56229076896153 | 8.33949522103708 | 8.12481146854485 |
| WNT2B | 7.24079920138617 | 6.97592246473492 | 6.67938157062602 | 6.84962746997191 | 6.86201613664151 | 6.44025750133194 | 6.41269855105456 | 6.88674004333921 |
| CHRDL1 | 7.27072515051362 | 6.81904223277137 | 7.16595212486739 | 5.73413242676309 | 5.69068247784 | 8.57545226652988 | 5.15676873085081 | 5.72211350477654 |
| LOC101930363 | 8.36726184586508 | 8.93941172268346 | 8.03544796058228 | 5.71314590249026 | 7.47056940182629 | 9.44817413597714 | 7.54027530416586 | 6.67935341828162 |
| PAPSS2 | 7.0891919778551 | 7.64553499295006 | 8.11621606260258 | 6.29607434484862 | 7.40476265276337 | 7.22413548640118 | 6.03540909492068 | 7.27470707584422 |
| FLNC | 7.92556037382553 | 6.83822065657141 | 7.44820718097504 | 7.85046815919425 | 7.58442138861596 | 7.529001000476 | 7.08571145006833 | 6.80513765169039 |
| PLPP1 | 9.2054132855998 | 8.58172595872756 | 9.67447918936058 | 8.48778176223373 | 8.43223495576852 | 8.91740639342858 | 9.25163507494638 | 8.14657096674124 |
| AQP9 | 6.4836320032866 | 6.64018708262965 | 9.4330366328083 | 6.18740750330016 | 6.99021744572973 | 9.34494164685257 | 6.31738909628726 | 7.38117952795265 |
| TMEM255A | 3.99780724135875 | 5.94802842130835 | 5.2565729141975 | 4.0617070847916 | 5.60697514510161 | 3.83062041450882 | 5.34681509420054 | 4.53264735726689 |
| HOXC6 | 9.10983587669483 | 8.67384965361342 | 8.39608240533071 | 9.46779096930945 | 8.44281082813601 | 6.89327725818461 | 7.07094740551821 | 7.27460645026332 |
| LOC101926921 | 7.68867506695205 | 7.51661627342157 | 7.9589342904277 | 7.56170137320524 | 6.97556751636363 | 7.14583536867958 | 6.98265843135569 | 7.08582951819876 |
| PCOLCE2 | 7.30354332312854 | 6.18253936055814 | 4.57904736385862 | 4.98664757244361 | 4.1122330575985 | 5.94824573636031 | 5.61480994601251 | 5.19070966728318 |
| RNASE4 | 7.95125935828585 | 8.05823179105822 | 7.88556033267855 | 7.98986562286629 | 6.72844503742267 | 6.98250537077413 | 10.1373293242015 | 6.81494641812177 |
| TCF21 | 6.09502139844258 | 7.97529771919826 | 6.58212842986089 | 6.49841044886098 | 5.88924840807763 | 5.95460230210223 | 6.35858790991258 | 5.88753745561446 |
| LOC101928635 | 7.32008748507197 | 7.71274364635973 | 7.51930993886246 | 7.85819551787966 | 6.78907190867553 | 7.12884498946073 | 7.1458149937174 | 6.89285606223578 |
| PKD2 | 7.09504883499234 | 7.16308607215026 | 7.92835255572926 | 7.74607758366539 | 7.18685706717715 | 7.64599700274993 | 7.12844807325359 | 6.87765837268829 |
| WNT5A | 8.17723264828875 | 9.65048006256153 | 10.1095368629332 | 10.6389698114711 | 9.77970950736207 | 6.79496814386442 | 10.0472514036322 | 4.47019518507859 |
| FGF13 | 9.80008936934586 | 6.01249492791266 | 7.65177644541826 | 6.2079474981458 | 5.77261677409423 | 6.27241890516441 | 7.9957219334784 | 6.60054183907282 |
| LHX2 | 5.96080706724476 | 5.58520894007455 | 5.77415714289744 | 9.42431958014699 | 6.1733293486728 | 5.9252232866692 | 6.20238833449477 | 6.02761632296895 |
| ATP10D | 7.01533699141276 | 8.44136727845972 | 8.03202919164934 | 6.19210734841821 | 7.20099666084225 | 7.5868472922078 | 7.87549749123928 | 5.98694558906382 |
| ARHGAP18 | 8.51314750804456 | 10.3257330647701 | 9.75449905766737 | 8.15283341850107 | 9.62063833517622 | 8.83644228237541 | 7.73284420214218 | 9.84815970149752 |
| LOC286191 | 5.87883322082831 | 5.95821396856796 | 6.60719121644549 | 6.81699641872007 | 7.92873154379368 | 6.08812675250572 | 7.37428312188371 | 8.4377229476885 |
| EFEMP1 | 8.57212732777212 | 6.53384000953952 | 7.19821222694074 | 9.34823566641505 | 8.87719321862856 | 8.02665880882307 | 5.59801875373375 | 8.31269149059656 |
| LOC100996760 | 5.665694059083 | 5.51653210416876 | 6.23532306398193 | 4.48616086912479 | 4.27735993994287 | 5.7656487784128 | 3.39947190881555 | 3.73057474788763 |

| **Gene** | **GSM461399** | **GSM461400** | **GSM462643** | **GSM462644** | **GSM462645** | **GSM462646** | **GSM462647** | **GSM462648** |
| --- | --- | --- | --- | --- | --- | --- | --- | --- |
| CD24 | 11.1686726401847 | 11.7595579783526 | 8.62998747905102 | 9.34589759299383 | 9.97495299031193 | 8.78716312581074 | 7.76328784983178 | 8.40792854570292 |
| CLDN3 | 7.56407592400368 | 11.1896176507051 | 6.38727809162199 | 6.17034272140179 | 7.081293818089 | 6.22727803164429 | 5.68166430418011 | 6.09311433546962 |
| C1orf106 | 10.9270668077593 | 9.79963294218088 | 6.68988618442205 | 6.86031726338398 | 7.80415684099774 | 6.73206564464525 | 6.64643630538274 | 6.4312217839103 |
| CRABP2 | 10.3259350209177 | 11.2558488546235 | 7.53987222578218 | 7.72041528490633 | 7.77453670723411 | 7.47660850857877 | 8.35327476525676 | 8.2213889485368 |
| SOX17 | 7.39855131977431 | 10.9128818533525 | 5.84360327801797 | 6.00408223068691 | 8.11064512270891 | 6.00533710427198 | 4.74043920579174 | 7.41492619331705 |
| ELF3 | 8.77992067173365 | 9.01224647530006 | 6.19061815881021 | 6.09968164586474 | 7.42266190990904 | 6.72131431883798 | 6.01936610632653 | 6.01425039023548 |
| EPCAM | 12.6383114603365 | 13.0193700680948 | 8.8599416031859 | 8.54574447461289 | 10.2732477838556 | 9.32818571916991 | 8.03040229602391 | 9.64210947179763 |
| SCGB2A1 | 6.59357637348406 | 9.93747387104487 | 4.96372842280257 | 5.13235885916409 | 7.85418894139438 | 5.00262151838431 | 4.65579258476295 | 7.16109156255947 |
| KLK6 | 7.44262009692281 | 9.56059650801735 | 6.30016217151339 | 6.68806843065787 | 7.14477039144418 | 6.62605650893703 | 5.71080367914772 | 5.77044586185115 |
| MMP7 | 11.7739262912713 | 13.036195939804 | 5.42095055863085 | 5.50142322128467 | 8.43089574640818 | 5.45064711394215 | 5.18728872190727 | 6.27828217953273 |
| CLDN4 | 8.71457695595222 | 9.12307122691934 | 8.37914006442636 | 8.3026937520109 | 8.50221124215447 | 8.28546001798651 | 6.93201686620162 | 6.95238365907783 |
| CKS2 | 11.4866590724146 | 11.4277999464945 | 8.34369206917902 | 7.8420045580686 | 8.74494144710229 | 7.94095367400235 | 8.12812324238668 | 7.32839668248066 |
| CP | 8.44773208635211 | 10.9447321898293 | 8.76330259468961 | 9.32777919116393 | 9.45564726991948 | 8.831722889134 | 5.9764541450507 | 6.06749244386107 |
| PSAT1 | 10.620559836175 | 10.1906074531445 | 7.85385845492173 | 7.92887363865446 | 7.89605080111087 | 7.37522627432801 | 6.85659795695152 | 7.74422569240964 |
| MECOM | 7.66325409225145 | 9.6831844031834 | 6.28273446724515 | 6.48795351601137 | 7.43674634959767 | 6.54259422665049 | 5.04299708924398 | 6.35150890044204 |
| ESRP1 | 10.934483329362 | 10.4243027818919 | 7.98656168218115 | 7.60888462743453 | 8.68606800401043 | 8.30770629010997 | 6.86522290259965 | 7.78699324444959 |
| WFDC2 | 10.0616652820924 | 11.5507783641894 | 7.94104310359868 | 8.55117299071636 | 8.5065576450827 | 7.93022816557861 | 6.88620381993077 | 7.01831183936642 |
| CEP55 | 10.5083395113816 | 9.86011702693978 | 7.492974756328 | 5.09984221367837 | 7.14385255565283 | 5.51708038066076 | 6.79516951012132 | 5.08727612745742 |
| MUC1 | 10.6180482218574 | 10.0014413647374 | 10.184761558864 | 10.7148874599933 | 10.7681719162226 | 10.4527138572511 | 8.60231100161335 | 8.5545946070985 |
| MCM2 | 11.3319861818682 | 11.3811373389686 | 7.92333342853791 | 7.77904298460863 | 8.16392636518249 | 7.63829109417095 | 8.14261765544658 | 8.35372467015881 |
| FAM83D | 10.5263818625619 | 10.5802208741258 | 6.93074916288361 | 6.62017142933479 | 7.93353723137103 | 6.5546655887347 | 5.86458731908003 | 5.74479617224224 |
| ZWINT | 11.4652908992539 | 11.3455161336969 | 8.30094736348688 | 7.49629456229237 | 8.01835598702873 | 7.2751281363975 | 8.33019535019716 | 7.88437813012256 |
| NEK2 | 9.27219539490303 | 8.85675262692204 | 6.12531944038331 | 5.30612003420913 | 6.40382328475951 | 5.07746519788122 | 5.336481566269 | 4.86411184085034 |
| BUB1B | 10.5986573744882 | 10.8999837170504 | 7.231173170094 | 6.27750314886412 | 7.755488499898 | 5.44762878420633 | 6.96375153865527 | 7.13931599996924 |
| DLGAP5 | 9.61042693278818 | 9.79984013269156 | 6.72834231312715 | 5.37039099187902 | 7.03643739553011 | 5.31100168890683 | 6.04652598339857 | 4.82585684478516 |
| MELK | 11.2284579716439 | 10.5608295708198 | 8.03772264732192 | 6.28901737046039 | 8.12742177074162 | 6.21274246743033 | 7.07539357467705 | 7.01320541042734 |
| FZD10 | 8.90508308938224 | 11.3564904855935 | 5.18254531944446 | 5.0558810839576 | 5.34408636898914 | 4.83203933265197 | 4.12796337812358 | 4.55011262964724 |
| LPAR3 | 6.7160354097279 | 9.41022024738207 | 7.40938754155714 | 7.21194814203654 | 7.99603136171981 | 7.69796107924655 | 5.50039894700522 | 6.54349047021596 |
| ITLN1 | 6.23580363397575 | 7.47446038000787 | 11.6072933210948 | 12.9313986675521 | 9.49825086752783 | 11.3031756938082 | 13.5305770312821 | 13.2127957756639 |
| LINC01105 | 4.95642067318005 | 4.93615108566945 | 7.98686028525136 | 8.26956464480896 | 7.48876938460554 | 8.01870278352509 | 8.90248566259962 | 9.19448683591786 |
| ANXA8L1 | 8.98346394204322 | 8.13842540637337 | 10.5715346113526 | 11.7806299843524 | 10.0022805851357 | 10.5486003828676 | 12.613623733762 | 12.392698441463 |
| DFNA5 | 10.2825208894544 | 8.62858770649068 | 10.0898212041195 | 11.216818597288 | 9.61090303018322 | 10.2528428020844 | 11.9400455907324 | 11.7644237883022 |
| PRG4 | 4.62467411453116 | 4.28122345484485 | 8.21306532590677 | 7.58053746786307 | 8.6331296486019 | 9.4510482842037 | 9.76600540188017 | 9.8109700077636 |
| ABCA8 | 6.15109707379445 | 7.09394639312928 | 8.78678594164735 | 9.31040594343522 | 8.03798907292718 | 8.57926187604941 | 9.95073128427752 | 9.92677804868524 |
| PROCR | 7.76227572220517 | 8.17666186187649 | 8.72787281761973 | 8.84311392103568 | 9.08673335329208 | 9.2977187551009 | 11.1667593737993 | 10.6525133838644 |
| CHGB | 6.13484315265772 | 6.04948701377433 | 8.67663060367967 | 10.1598839476939 | 8.15541531179699 | 8.19535252017191 | 7.92661622864016 | 10.2259906426726 |
| AOX1 | 7.28406988534516 | 6.635258851279 | 9.52099280958424 | 9.85721980381241 | 8.94297920114984 | 9.21559366689063 | 11.2394433924093 | 11.048994248317 |
| CALB2 | 8.63120980250854 | 8.04393500698278 | 9.91192821717423 | 10.5736661203749 | 9.63818790117998 | 10.0157634873699 | 11.0517595346974 | 11.0939720865619 |
| HAND2-AS1 | 4.83936001910037 | 4.71549805747734 | 6.96730581385154 | 7.16719231502073 | 7.26663195794487 | 7.64582772751124 | 8.54069376640087 | 8.7056790366265 |
| BNC1 | 8.55887602791076 | 5.9221728674777 | 10.1869294724123 | 10.996138021371 | 9.6529005291326 | 10.04959673636 | 11.6224751370763 | 11.6609719225619 |
| BCHE | 3.87884302764179 | 7.76139831196265 | 9.48853910937306 | 7.93983188419052 | 8.9937253034727 | 9.41503186374033 | 11.9533343626155 | 11.8351740542421 |
| CLEC4M | 5.57714932600712 | 5.77942520576001 | 10.077136160332 | 9.24100831625484 | 8.60575173393301 | 9.4223970104442 | 9.37831111459234 | 9.82319286404816 |
| NPY1R | 5.38176788160164 | 6.19587118899843 | 9.68796523940516 | 8.70490999512229 | 9.43247508807232 | 10.0995845139626 | 10.7166137147465 | 10.3409293938957 |
| TCEAL2 | 6.47660850857877 | 8.97861036777226 | 10.0454866563595 | 10.7326762230733 | 9.61940934222712 | 9.83415972294165 | 10.6799198785184 | 11.0632467592209 |
| MNDA | 8.26845778702517 | 8.64235500618135 | 10.3426414091096 | 10.117110595415 | 9.12962046506705 | 9.98997628608045 | 10.7259115327623 | 11.0012463219659 |
| PDE8B | 4.83492353965189 | 5.34378326503012 | 6.86376380042926 | 7.6318752530091 | 7.69712696477503 | 8.22487699904001 | 7.54877850753269 | 8.34212046005798 |
| REEP1 | 6.72913942506768 | 7.59446644019059 | 9.83138642357435 | 10.5968652787845 | 9.06398147830727 | 9.76788400779914 | 11.1826891942488 | 10.9740739531013 |
| ADH1C | 4.74980240168005 | 5.96106531039486 | 7.74172988350515 | 7.23008770384785 | 7.16387103159421 | 8.20344099813611 | 8.49953101043594 | 8.68173386871581 |
| SPOCK1 | 8.27617559677068 | 8.47676645214882 | 10.0230751150703 | 10.8419495391215 | 9.54549930889441 | 10.2714863722955 | 11.4752115753962 | 12.0611213829353 |
| KDR | 8.27827288570357 | 8.8044795496948 | 9.78836923818128 | 9.87071147959971 | 9.33871187326079 | 9.8708054757338 | 10.6592823933843 | 10.779358225866 |
| GADL1 | 4.62453375520389 | 4.65324349606207 | 7.32859415209398 | 6.73043617103886 | 7.94719273864632 | 8.04844872857668 | 7.51511633542018 | 8.7500269255752 |
| SFRP1 | 7.63742259441094 | 6.42071186830702 | 9.47331585476612 | 9.61311707820928 | 9.25621541243791 | 9.47637226967382 | 9.87530799121936 | 10.738800995272 |
| BAMBI | 8.03250863788483 | 8.62903962952872 | 8.49369536323967 | 9.81981026203781 | 8.77837943941689 | 8.77126495944037 | 9.09268843952024 | 10.0029275020631 |
| LGALS2 | 5.90027995241134 | 6.66633053634962 | 7.46467643441149 | 8.68402972327349 | 7.29912557631515 | 7.28619733159821 | 9.35167911862121 | 8.7378455951205 |
| DIRAS3 | 6.13997489004342 | 6.41962315862288 | 9.35586861173809 | 9.88157438688597 | 8.92074883500022 | 9.28324581355244 | 9.43378988669845 | 10.0658469265476 |
| C21orf62 | 7.11107723077098 | 6.49592616078922 | 8.49726905404106 | 8.24658622780212 | 8.19127640462143 | 8.54179552376158 | 8.0307581638462 | 8.69100541019225 |
| TCEAL7 | 5.27746409329539 | 7.1238834285197 | 8.43613268255824 | 9.33973867952789 | 8.18876685365043 | 8.55117375992623 | 9.14277845644169 | 9.53599460050189 |
| OGN | 5.45798820176763 | 6.50778750597481 | 9.25393491840102 | 8.46943017931329 | 8.68583330154383 | 9.2936429227835 | 11.7863594869419 | 11.306816456782 |
| SYT4 | 5.14845421069846 | 5.58256202426627 | 9.46963978240728 | 8.99151901170151 | 8.35289532462556 | 9.40879251792545 | 10.545804311888 | 10.0519566097944 |
| LOC100506718 | 6.71793546808654 | 7.17369479328377 | 8.32149401733042 | 9.19229750013936 | 8.72723296909196 | 8.94320636386946 | 10.7102433628802 | 10.4647254378888 |
| GPRASP1 | 6.50861563296158 | 7.21899422462706 | 8.59065066930527 | 9.24047652799133 | 8.75001352214428 | 8.76875334912132 | 9.59500193299889 | 10.2749604721406 |
| NELL2 | 8.40643037569155 | 9.34429590791582 | 10.2254484686107 | 10.2916311829009 | 9.76287199009016 | 10.0532742822694 | 10.9009724407797 | 11.4715329698406 |
| AADACL2 | 3.76558778564685 | 4.48726766466093 | 7.81429405828283 | 7.12733406279952 | 8.24947378510829 | 8.0897364758313 | 7.19450079025845 | 7.37036483469653 |
| GHR | 5.92872799124284 | 8.20798555431013 | 7.67176749279937 | 8.18148524364631 | 8.28846469309646 | 8.34258585609813 | 9.81404245566065 | 10.0399745680311 |
| ADH1B | 6.03277893123335 | 8.69566714860901 | 8.21045388829738 | 7.30263595386596 | 7.68059318426276 | 8.09723614341028 | 11.158470429236 | 10.5879827993829 |
| MGARP | 5.9075612928775 | 6.52053696808067 | 10.1815498441197 | 10.9825301841871 | 8.93315655241305 | 9.81815393865716 | 11.4848329618826 | 11.3921563987213 |
| IGFBP6 | 9.60845258980499 | 9.20606441637471 | 9.21136513151528 | 10.7249656903783 | 9.63895714500556 | 9.58456232277242 | 10.6544928258835 | 10.853683827727 |
| GFPT2 | 7.94593538096101 | 7.4705287307945 | 9.99973228760622 | 10.2552174536945 | 9.44837032955836 | 9.40981943778731 | 10.1793244313311 | 9.91904505308498 |
| OLFML1 | 8.38786224112926 | 8.67075891578724 | 8.34744863341849 | 9.19030620027651 | 8.47061007171155 | 8.69671372863942 | 10.4717158531166 | 10.5335536149736 |
| NAP1L3 | 7.37043458612932 | 8.42016235159944 | 9.42771720306609 | 9.39631578513081 | 8.87958631265633 | 9.30158764660319 | 9.39109318895541 | 10.6336037625223 |
| HBB | 7.59152047658243 | 7.84632406391794 | 9.54600021334419 | 8.88743845054339 | 11.8898273357423 | 11.0632396798318 | 13.3087030001893 | 13.2060333095756 |
| DAPK1-IT1 | 5.32788133901421 | 5.35996386257241 | 7.19599713734732 | 6.53552267457431 | 7.49142022288314 | 7.40353189679398 | 8.86236459887918 | 8.96773637248203 |
| ALDH1A1 | 7.54132123225865 | 7.36806114348482 | 9.97431419997794 | 9.39856200778973 | 8.7680552705953 | 9.15290336978464 | 9.52502547054791 | 9.94544968908426 |
| LRRN4 | 7.15951314074906 | 8.39876292774383 | 7.93795931343131 | 8.12969773215677 | 8.07694115948833 | 8.44285436107405 | 9.3534688590889 | 9.45644682677747 |
| HAS1 | 5.86514927094387 | 5.77627510051224 | 8.30126754056557 | 9.45222888324693 | 8.99429120161279 | 10.3756042314846 | 10.4345239828994 | 10.3662566357081 |
| LXN | 10.0898609187918 | 9.71854828756598 | 10.0202855008446 | 10.7374670689486 | 9.96978941232416 | 10.0203271765559 | 11.0607769796941 | 10.688215334284 |
| CLDN15 | 9.08480732504519 | 8.20668717456829 | 10.1329238003592 | 11.106042691298 | 9.86575337257188 | 10.1534823652085 | 11.036400647408 | 10.9074683093431 |
| PDGFD | 7.2693838627958 | 7.99560747060187 | 8.74818446180321 | 9.59293162829221 | 8.42061713897869 | 9.40392593813713 | 10.3204181106916 | 9.99268325815949 |
| PRSS35 | 5.46052306351447 | 4.29006309504764 | 9.13950530820529 | 8.45017199727674 | 8.87048493916107 | 8.12563043963454 | 7.33229618771947 | 9.87945765922782 |
| HBA2 | 8.98057470026007 | 8.19460666845255 | 9.86633774630116 | 9.71630761240817 | 12.0731736535948 | 11.3179872408637 | 13.5827124062967 | 13.4199200292977 |
| WNT2B | 7.62612606857222 | 7.42962851659818 | 9.06755939787177 | 9.09558295231085 | 8.81020207754705 | 9.02076886509457 | 9.49460661563278 | 10.2184724216425 |
| CHRDL1 | 9.1777708250981 | 7.8410422099282 | 10.2163336007155 | 10.9607477111087 | 9.29642987476042 | 9.6445286895732 | 11.7230508053832 | 11.5116192477156 |
| LOC101930363 | 5.34048393696185 | 6.32357543310871 | 10.5614979847447 | 10.9212012500534 | 10.1624290951485 | 10.4541553254206 | 11.7237931782854 | 11.8887584671201 |
| PAPSS2 | 7.91903074709766 | 7.8453079274271 | 8.94687314324943 | 8.50415703096697 | 8.22627457864897 | 8.3856654258966 | 10.2257119508944 | 9.86825256530716 |
| FLNC | 7.32089980830012 | 8.81017957970456 | 8.40318249445324 | 9.27642454769643 | 8.19430378689338 | 8.75024136353615 | 9.70806822532859 | 9.65573284729684 |
| PLPP1 | 9.87081549135426 | 9.31431586494056 | 9.79798893184422 | 10.640353405456 | 9.73780166414147 | 10.0522705152154 | 10.6237187433709 | 10.140829770773 |
| AQP9 | 8.82777139965517 | 6.91315270879336 | 9.10141371121794 | 10.5631104517173 | 9.50549797676698 | 9.49819101997674 | 11.4884979375868 | 11.1669727233917 |
| TMEM255A | 8.45320477481652 | 6.16764494475461 | 8.33305693054774 | 9.38470605612181 | 7.22551595026194 | 8.38171597769485 | 10.2755192772375 | 10.4146852358072 |
| HOXC6 | 7.89450251818694 | 7.18465718695862 | 9.73355093509517 | 9.98019671294504 | 9.44227174006406 | 9.55638534605314 | 9.89709064136392 | 10.089781488354 |
| LOC101926921 | 8.53472813755623 | 7.95069556707766 | 9.69690196555327 | 10.0092665886844 | 9.51038648638427 | 9.36411757900211 | 9.84462346804093 | 9.52012479952474 |
| PCOLCE2 | 7.155354590605 | 7.30209966857658 | 8.34840948700597 | 8.30337892904906 | 7.74087360661564 | 7.58549589870783 | 10.3659505631115 | 10.0781374617428 |
| RNASE4 | 8.32461486523535 | 8.59847314732085 | 8.82824916554479 | 9.71387792710349 | 8.77580284670925 | 8.99985205981808 | 10.2383969764584 | 10.2796187056195 |
| TCF21 | 7.07699939537728 | 6.89860622408952 | 8.40448380180297 | 9.59363481962289 | 8.59708976179813 | 9.05575015083255 | 8.80912821787148 | 9.69249432765688 |
| LOC101928635 | 7.32562117172451 | 8.64415010894731 | 9.98833817115546 | 10.6902970463811 | 9.51619149276804 | 9.79974544384541 | 11.2434286942696 | 11.0470062963111 |
| PKD2 | 7.74517681512893 | 7.97611155453936 | 8.63967353030629 | 9.40099894453086 | 8.86525074552389 | 9.37796313882912 | 11.1238886003131 | 10.9483599304779 |
| WNT5A | 9.61009190963991 | 9.6049506798968 | 8.95774196854374 | 9.89940299778815 | 9.01110842390302 | 9.45692829848059 | 10.2699448316634 | 10.6969457987357 |
| FGF13 | 5.94955127413043 | 7.76825711947914 | 8.85241090547762 | 9.20801238818151 | 8.28217103539265 | 8.95682624854524 | 9.31227036036736 | 10.0604122278032 |
| LHX2 | 6.66244407729878 | 6.23370019702656 | 7.7280351170416 | 8.60308291405482 | 8.13234549117917 | 8.4758691838036 | 8.61161540651708 | 9.90853973513954 |
| ATP10D | 8.7149907176105 | 8.05445780270315 | 8.21564947841094 | 8.56155526295974 | 8.01840050057123 | 8.52429487847604 | 9.30695255769717 | 9.61219397643293 |
| ARHGAP18 | 9.5982324386192 | 9.52457044524287 | 9.58978033730104 | 10.0836867413857 | 8.97576582517433 | 9.5018723404647 | 11.0797587631987 | 10.9713342236881 |
| LOC286191 | 6.75499436450498 | 5.67825223072263 | 8.93649071771147 | 9.64358385538339 | 9.19945150726558 | 9.68305776602256 | 10.2684016421108 | 10.5592432358708 |
| EFEMP1 | 10.4518057227923 | 8.98641567690954 | 9.64457735701838 | 10.4528598911016 | 9.26754516132392 | 9.54702805150625 | 11.7244171019108 | 11.5709906196858 |
| LOC100996760 | 6.46420264829773 | 4.77287273694823 | 9.51237702772485 | 9.59580573193941 | 8.01467888103659 | 8.47486998711906 | 9.10648180701387 | 9.49514349489595 |

| **Gene** | **GSM462649** | **GSM462650** | **GSM462651** | **GSM462652** | **GSM657529** | **GSM657530** | **GSM657531** | **GSM657532** | **GSM657533** | **GSM657534** |
| --- | --- | --- | --- | --- | --- | --- | --- | --- | --- | --- |
| CD24 | 6.53169959818063 | 6.81729090056792 | 7.91339808086938 | 7.30122851020887 | 9.033497 | 7.382665 | 8.51604 | 9.0883 | 7.949471 | 7.448948 |
| CLDN3 | 5.68292718613471 | 5.66174105031255 | 5.93283245349466 | 6.06077265724873 | 7.509148 | 7.73608 | 8.38903 | 8.46948 | 6.538503 | 8.970589 |
| C1orf106 | 6.70844936987286 | 6.59403939617215 | 6.47579340692928 | 6.64873865485294 | 8.541925 | 7.868225 | 8.487556 | 8.664886 | 7.552346 | 5.946261 |
| CRABP2 | 7.63622583062165 | 7.53078866402487 | 8.52018256522569 | 8.04084312749823 | 11.182364 | 8.957403 | 8.916262 | 10.287448 | 8.24859 | 9.556732 |
| SOX17 | 4.89364130545141 | 4.67413010907659 | 5.14721103157498 | 5.72981105119448 | 8.321483 | 7.083017 | 7.319983 | 8.025835 | 7.286808 | 7.048647 |
| ELF3 | 6.1111266331438 | 6.10909236956713 | 7.26101359384294 | 6.43501678564777 | 7.625238 | 7.461017 | 8.274948 | 7.661968 | 7.252273 | 6.02974 |
| EPCAM | 9.43023508558905 | 9.49708139574203 | 10.9836563208577 | 10.4147803554214 | 9.094985 | 8.782278 | 9.656824 | 8.959874 | 9.572696 | 9.62818 |
| SCGB2A1 | 3.75197780658764 | 4.89691118242892 | 5.22768332376089 | 6.50193747359583 | 11.221759 | 6.260798 | 6.467888 | 8.569796 | 7.354681 | 8.114651 |
| KLK6 | 5.92538709237824 | 5.68280361578712 | 7.85595233421139 | 6.06550338041795 | 7.94889 | 6.698856 | 6.907828 | 8.519707 | 6.70973 | 6.705934 |
| MMP7 | 5.25790070975845 | 5.44296007845505 | 6.55110068315692 | 5.90421672897159 | 7.366687 | 9.651439 | 5.768585 | 10.398071 | 7.032594 | 5.314606 |
| CLDN4 | 7.05217186658548 | 6.97840158349824 | 7.4443937530666 | 7.14676568848352 | 5.509634 | 5.805487 | 5.523074 | 6.997155 | 5.758493 | 5.765486 |
| CKS2 | 8.04249660242457 | 8.31493665277304 | 8.57441944740109 | 7.59801526884143 | 7.664423 | 7.726416 | 6.618844 | 8.544136 | 9.749004 | 7.954639 |
| CP | 5.75679780779446 | 6.85065036376916 | 5.88661598890184 | 6.53366885233272 | 7.323275 | 9.08832 | 7.30843 | 6.407197 | 6.450234 | 5.069931 |
| PSAT1 | 6.96712882679004 | 6.65295178224615 | 6.57133702680612 | 6.98198447580919 | 6.444364 | 5.992733 | 5.736172 | 7.054438 | 5.662736 | 6.038891 |
| MECOM | 4.49703236099823 | 4.54127569207039 | 5.53013880405426 | 4.89928875963723 | 5.742506 | 4.808403 | 6.2313 | 4.746576 | 5.391398 | 5.434168 |
| ESRP1 | 7.90560361866787 | 7.51824044849599 | 8.93884739723911 | 9.03849791323159 | 7.571541 | 7.658339 | 6.640758 | 7.246198 | 7.132363 | 6.637601 |
| WFDC2 | 6.87479573660789 | 6.61919924640295 | 6.73596527494281 | 6.74020485834256 | 10.80406 | 10.35652 | 11.271864 | 10.616022 | 12.101544 | 11.441089 |
| CEP55 | 6.44465216015284 | 6.42117616256112 | 7.2949055841239 | 5.36526559977161 | 5.587716 | 6.350739 | 4.107115 | 5.342743 | 6.385012 | 5.721931 |
| MUC1 | 8.45703675424054 | 8.86559389019111 | 8.19315176376671 | 8.38626604000285 | 8.444239 | 9.185771 | 9.387211 | 8.866279 | 7.964169 | 7.314441 |
| MCM2 | 8.00063667410226 | 8.14893410452634 | 8.50828998614035 | 8.58750001223203 | 7.500546 | 8.219109 | 8.477325 | 7.241728 | 7.780721 | 7.716675 |
| FAM83D | 6.47155816846905 | 6.6427809814044 | 7.2173761418587 | 5.60305063560736 | NA | NA | NA | NA | NA | NA |
| ZWINT | 8.28380141926708 | 7.95478373996731 | 9.0940090471296 | 7.97909931953102 | 6.00672 | 7.700218 | 7.469132 | 6.808742 | 8.396355 | 7.081577 |
| NEK2 | 4.6442629724226 | 5.13647031536897 | 5.74002896817252 | 5.18206256989084 | 6.647625 | 4.552224 | 5.152943 | 4.686081 | 5.999317 | 5.03489 |
| BUB1B | 6.53535159245879 | 7.30203567576684 | 7.95957311560213 | 6.67132168254606 | 6.886065 | 7.241897 | 5.696276 | 5.950089 | 7.669271 | 7.000119 |
| DLGAP5 | 4.56582867084268 | 6.33656904176912 | 6.76212287850143 | 4.66850494181034 | 5.492162 | 4.635038 | 5.857015 | 4.813354 | 6.671599 | 4.979666 |
| MELK | 7.03673409374008 | 7.10241668227554 | 8.19320992898356 | 6.44679713911575 | 7.449115 | 7.162531 | 6.599496 | 6.182586 | 8.371756 | 7.267071 |
| FZD10 | 5.06028521846302 | 4.25029462756955 | 4.29221486481648 | 5.23674516357746 | 4.8432 | 5.014446 | 3.856106 | 5.49276 | 4.011374 | 6.219147 |
| LPAR3 | 5.33816088314413 | 5.42318315729257 | 6.00752069917313 | 5.87740316437576 | 5.690409 | 5.807898 | 5.853422 | 4.631651 | 4.953341 | 4.915831 |
| ITLN1 | 13.1793337628514 | 13.3554887515979 | 13.0678208651989 | 12.7894847392248 | NA | NA | NA | NA | NA | NA |
| LINC01105 | 8.54413630450999 | 9.11841077706243 | 9.38797350211619 | 8.93044660226294 | NA | NA | NA | NA | NA | NA |
| ANXA8L1 | 12.3427997234573 | 12.2315182108829 | 12.1554412440273 | 11.633285887259 | 6.42675 | 6.697495 | 7.734859 | 7.173842 | 6.237225 | 6.876258 |
| DFNA5 | 11.6661618546013 | 11.8692699523072 | 11.8750428030026 | 11.414050944726 | 5.185177 | 5.58709 | 5.48122 | 6.625712 | 5.530314 | 6.064586 |
| PRG4 | 10.211279947482 | 11.6722573713739 | 9.41916384318139 | 8.01945729374431 | 3.044246 | 3.447589 | 3.578969 | 3.21751 | 3.332467 | 3.442063 |
| ABCA8 | 9.69015690364395 | 10.1010366290797 | 9.86320833019823 | 9.7258926782119 | 5.018538 | 3.695393 | 3.38079 | 4.251027 | 4.345067 | 3.8929 |
| PROCR | 11.1480316296364 | 11.7353148494511 | 10.4929947780476 | 10.2242067249741 | 4.194366 | 3.364634 | 3.47472 | 4.208639 | 3.388666 | 3.639565 |
| CHGB | 8.01647403390102 | 8.42868259681251 | 9.41438081089109 | 9.54485434342523 | 6.114399 | 3.791814 | 4.006057 | 3.70596 | 3.889968 | 3.943603 |
| AOX1 | 11.3281391459844 | 11.2475745082739 | 10.5664332191904 | 10.5570768887669 | 5.876096 | 4.992162 | 5.186497 | 4.973819 | 4.991004 | 5.226164 |
| CALB2 | 11.0206188728299 | 11.4923088758847 | 11.6943491805263 | 11.3510496440128 | 5.448267 | 5.280152 | 5.578841 | 5.076287 | 4.626998 | 5.47916 |
| HAND2-AS1 | 9.1385994736326 | 8.98707353532603 | 8.30119207665447 | 8.57879534192275 | 4.727184 | 4.793992 | 4.060164 | 4.398752 | 4.294569 | 4.479028 |
| BNC1 | 11.5182302178386 | 11.7784734875879 | 11.6538303286921 | 11.5824195772837 | 4.125582 | 4.989037 | 4.68078 | 4.617059 | 4.3813 | 4.817479 |
| BCHE | 12.22935058623 | 12.1983253234925 | 10.8656095617931 | 10.538402361395 | 3.945333 | 3.254899 | 3.261966 | 3.652233 | 3.276151 | 3.674271 |
| CLEC4M | 7.51449709120238 | 10.0148608674301 | 10.7435048700111 | 9.58242898636896 | 4.8149 | 4.252716 | 4.186909 | 4.197759 | 4.131361 | 4.367927 |
| NPY1R | 11.1177469820804 | 11.024232400687 | 11.0494810237155 | 11.1341118194978 | 4.436199 | 3.11178 | 2.961468 | 3.307862 | 3.345312 | 3.170152 |
| TCEAL2 | 11.013692547813 | 10.97837441072 | 11.3962783184408 | 11.141787841671 | 3.817313 | 3.373342 | 3.260359 | 3.688207 | 3.790839 | 4.196189 |
| MNDA | 10.6804826001075 | 10.9674064043118 | 11.6170495650265 | 11.1041335044039 | 3.868584 | 5.2388 | 4.030978 | 5.965833 | 5.459263 | 4.417274 |
| PDE8B | 9.11300761084593 | 8.17915570703133 | 8.26485556476692 | 9.20307469222911 | 5.240541 | 5.152788 | 5.044033 | 5.0892 | 5.446296 | 5.66399 |
| REEP1 | 10.6448026478727 | 10.9105003275677 | 11.3164710498227 | 10.7452331296423 | 4.760558 | 4.825475 | 5.445102 | 4.681297 | 4.933364 | 5.276857 |
| ADH1C | 9.79194752730097 | 8.17998868478701 | 7.16902303514792 | 8.56438579056015 | 3.691905 | 3.400739 | 4.470649 | 3.555987 | 3.77825 | 3.457546 |
| SPOCK1 | 10.3373208445696 | 11.3424691878107 | 11.9230897405926 | 11.4647295214368 | 5.542038 | 5.410421 | 5.317939 | 7.454284 | 4.917994 | 6.081439 |
| KDR | 10.7162878893021 | 11.4351545485238 | 11.1299526841961 | 10.4262752393663 | 3.902165 | 4.635007 | 4.409656 | 4.400221 | 4.145205 | 4.377621 |
| GADL1 | 8.2238231356712 | 7.97450636867802 | 9.31812474039052 | 9.96611606636806 | NA | NA | NA | NA | NA | NA |
| SFRP1 | 8.24320909814768 | 9.08910681525494 | 9.62781040491848 | 10.687274192527 | 4.919866 | 4.526985 | 4.918587 | 4.591561 | 5.344019 | 4.48359 |
| BAMBI | 9.23512150242412 | 9.26056204903997 | 9.75276865842782 | 10.1710766939159 | 4.939234 | 4.708158 | 4.735959 | 5.130693 | 5.30787 | 4.414165 |
| LGALS2 | 10.0571253042715 | 9.23154041068195 | 8.60670871122338 | 8.62554447603872 | 3.217329 | 4.997184 | 3.65054 | 4.080973 | 4.405111 | 3.8692 |
| DIRAS3 | 8.92514197040584 | 9.97388387871935 | 11.126317293423 | 10.3200220280122 | 5.018569 | 4.11645 | 4.047467 | 4.200495 | 5.354048 | 4.669407 |
| C21orf62 | 8.60952228401792 | 8.5143550614288 | 8.04850867091989 | 8.09233166811064 | 4.085456 | 4.593342 | 4.785887 | 4.345184 | 4.32889 | 4.786579 |
| TCEAL7 | 9.28945410336933 | 8.84929562399968 | 9.41694527227598 | 8.7145615019733 | NA | NA | NA | NA | NA | NA |
| OGN | 11.8977055652704 | 11.8829142933212 | 9.40238217209507 | 10.1030818817874 | 3.243917 | 3.13265 | 3.003627 | 2.944592 | 3.623783 | 3.128976 |
| SYT4 | 8.87138164605848 | 10.6159973899757 | 10.5611351698976 | 7.683289410935 | NA | NA | NA | NA | NA | NA |
| LOC100506718 | 10.7266322853715 | 11.0812637216111 | 10.4012589122707 | 10.2322126423829 | 5.818459 | 4.560315 | 4.838572 | 5.113251 | 5.346788 | 5.259838 |
| GPRASP1 | 9.49931175193198 | 9.30074149783615 | 9.56107023550974 | 9.94422302825125 | 5.304216 | 4.932989 | 4.420837 | 4.746707 | 5.109649 | 4.928872 |
| NELL2 | 11.1415451905444 | 11.050862162921 | 11.8390502179516 | 11.8633229009435 | 6.585379 | 5.581404 | 6.246322 | 5.4603 | 6.030095 | 5.84106 |
| AADACL2 | 7.74712553157204 | 7.7023112328583 | 7.80084167338493 | 9.27371402287496 | NA | NA | NA | NA | NA | NA |
| GHR | 9.92546987840584 | 9.91436569675455 | 9.1897998549863 | 9.7126060971653 | 3.54126 | 3.59073 | 3.886203 | 5.264106 | 3.976185 | 3.753273 |
| ADH1B | 11.5041140991449 | 10.5241926052419 | 8.47296260074054 | 9.5991746665191 | 3.445315 | 3.730774 | 3.449875 | 5.073377 | 3.622312 | 3.815764 |
| MGARP | 11.450871007916 | 11.4783550504796 | 11.2394612936653 | 10.7709694113176 | NA | NA | NA | NA | NA | NA |
| IGFBP6 | 11.0859902227414 | 10.4562311903407 | 11.8251376745167 | 11.309601404729 | 6.539685 | 5.557045 | 5.972797 | 6.717184 | 5.133205 | 5.960297 |
| GFPT2 | 9.6280809469988 | 9.65395748012164 | 9.73896200670326 | 8.80935656033858 | 4.705813 | 5.812544 | 6.000164 | 6.445584 | 5.198886 | 5.617764 |
| OLFML1 | 10.5781179091125 | 10.7735018958795 | 9.67989349555775 | 10.2624942333352 | 5.76968 | 5.210382 | 4.929626 | 5.741485 | 5.03501 | 5.603331 |
| NAP1L3 | 9.13437497784683 | 9.63773159106342 | 9.99224442979611 | 10.565882731756 | 3.92609 | 3.412645 | 3.536025 | 4.564569 | 4.355947 | 3.567141 |
| HBB | 13.3700890587301 | 13.0881760108503 | 11.5853087036404 | 13.1973216425919 | 7.365809 | 7.333471 | 6.488505 | 11.999064 | 7.981099 | 6.887964 |
| DAPK1-IT1 | 8.58222479543557 | 8.61628417225947 | 8.12639473762014 | 8.077029313819 | NA | NA | NA | NA | NA | NA |
| ALDH1A1 | 9.97749459428982 | 10.0834793273318 | 11.1423049355292 | 10.8291043046811 | 4.596585 | 3.851345 | 3.872566 | 3.960184 | 5.332889 | 6.791544 |
| LRRN4 | 9.37763459870411 | 9.35046409654148 | 9.22965761414802 | 8.99764101305298 | NA | NA | NA | NA | NA | NA |
| HAS1 | 9.51948096804472 | 10.2455883572577 | 10.7261500257262 | 8.54721073803315 | 5.134593 | 4.950725 | 5.238694 | 4.658222 | 4.632442 | 4.812315 |
| LXN | 11.0397552905544 | 11.2124963851939 | 10.986410935252 | 10.767911311926 | 6.583277 | 5.619934 | 5.022985 | 7.64052 | 7.06199 | 5.985599 |
| CLDN15 | 10.79378129842 | 11.0227821815382 | 10.7786537636661 | 10.8927708522079 | 7.809309 | 7.625012 | 7.6585 | 7.301022 | 7.268745 | 7.938006 |
| PDGFD | 10.1708896064391 | 10.1934502053434 | 9.94967134645663 | 10.0300028746834 | 5.661064 | 5.07242 | 4.709592 | 7.561712 | 5.84681 | 7.586964 |
| PRSS35 | 7.80278775366652 | 7.97085940486729 | 7.24224045303116 | 9.22357217930811 | NA | NA | NA | NA | NA | NA |
| HBA2 | 13.6839029293151 | 13.2519340450458 | 11.5187588707619 | 13.3887108772617 | 9.670636 | 7.938753 | 6.662832 | 11.51726 | 7.042933 | 7.875905 |
| WNT2B | 8.6895455300032 | 9.58104001195543 | 9.9191407952339 | 9.4840449581673 | 5.049069 | 4.817505 | 5.016398 | 4.759753 | 4.838788 | 5.395578 |
| CHRDL1 | 11.3178987065262 | 11.5078986769552 | 11.1975730218122 | 10.7814908616581 | 6.736396 | 4.550495 | 4.741179 | 5.221134 | 4.816417 | 5.205302 |
| LOC101930363 | 11.9427783888337 | 11.650778019709 | 11.6377297800215 | 11.7781551775545 | 3.934098 | 3.411786 | 3.54734 | 3.61825 | 4.029864 | 3.7542 |
| PAPSS2 | 10.0657423811429 | 9.71358584914028 | 9.17965866865868 | 9.50514925649448 | 4.596778 | 5.805169 | 4.936592 | 4.911046 | 4.825224 | 4.743104 |
| FLNC | 9.27542615808425 | 9.80179726175394 | 9.9828367514928 | 9.03042712686022 | 5.203691 | 5.670852 | 5.618071 | 5.892978 | 5.524957 | 6.646073 |
| PLPP1 | 10.1371262783297 | 10.6128643516097 | 10.7337220860617 | 10.2435976831592 | 5.616579 | 5.650713 | 4.902052 | 6.50208 | 5.663209 | 6.38448 |
| AQP9 | 11.3012389562152 | 11.0913163689913 | 10.6182294771827 | 10.8960750271685 | 4.791609 | 6.208086 | 5.28551 | 6.103063 | 5.393794 | 6.516771 |
| TMEM255A | 9.83088751844295 | 9.74805025059058 | 8.80796664961956 | 8.96711960211334 | 3.127067 | 2.979294 | 2.961771 | 3.381022 | 3.188169 | 3.193508 |
| HOXC6 | 9.72538670942285 | 9.68997002548213 | 10.0354589580327 | 10.3624150940538 | 7.058948 | 5.870585 | 4.849168 | 6.350725 | 6.737366 | 7.005052 |
| LOC101926921 | 9.91793405414235 | 9.93509310905233 | 9.45848915312892 | 9.23242344559415 | 6.164216 | 7.545658 | 5.698045 | 7.111776 | 6.54603 | 6.801297 |
| PCOLCE2 | 10.6944710694777 | 10.1362093337153 | 9.43773959040912 | 9.59602758363382 | 3.181299 | 3.096512 | 3.371191 | 3.404908 | 3.32586 | 3.179999 |
| RNASE4 | 10.4157892940643 | 10.0801513096141 | 9.32231576708848 | 10.1080454390994 | 4.690458 | 4.164042 | 4.057443 | 5.566807 | 5.024347 | 4.173189 |
| TCF21 | 8.50130796700548 | 8.5563182813451 | 9.17727625805104 | 9.87139550828489 | 6.212145 | 3.906072 | 4.330251 | 4.187889 | 4.928713 | 3.669121 |
| LOC101928635 | 11.0056705098067 | 11.443876489275 | 11.2938406097086 | 11.0137127834869 | 5.528538 | 5.548194 | 6.376976 | 5.147513 | 6.272085 | 8.336829 |
| PKD2 | 11.0619179224546 | 10.9272372204176 | 10.42271656565 | 10.3915765632575 | 4.253415 | 4.310712 | 4.262621 | 5.736888 | 4.123684 | 4.735521 |
| WNT5A | 10.0781174425237 | 10.2189627523014 | 10.8493112640723 | 10.846669599068 | 5.829415 | 4.597933 | 4.115748 | 4.380508 | 4.771857 | 4.212286 |
| FGF13 | 9.25563527140599 | 9.47360226145336 | 10.9827654625836 | 10.4256565137675 | 5.088973 | 4.324016 | 3.907789 | 4.440145 | 4.32521 | 4.821067 |
| LHX2 | 7.99496376576078 | 8.34908037664633 | 10.2488727858923 | 10.0427216186648 | 3.85845 | 3.844224 | 4.17841 | 3.618028 | 3.740192 | 3.831634 |
| ATP10D | 9.28031840736429 | 9.66615652748798 | 9.11675201725645 | 9.30778824331079 | 3.958551 | 4.673391 | 4.675533 | 4.755714 | 5.453302 | 5.252196 |
| ARHGAP18 | 10.7191845812798 | 10.8728277339839 | 10.9122049915365 | 10.8306615027799 | NA | NA | NA | NA | NA | NA |
| LOC286191 | 10.4922237411899 | 10.7817203422082 | 10.7291448645917 | 10.5713734359732 | NA | NA | NA | NA | NA | NA |
| EFEMP1 | 11.6896856592021 | 11.8063495962951 | 11.0863907426896 | 10.8962932704654 | 4.914705 | 4.175623 | 4.286927 | 6.641816 | 5.311404 | 5.393977 |
| LOC100996760 | 9.45906270058133 | 9.83494344341058 | 9.81206496671047 | 8.59726299036976 | NA | NA | NA | NA | NA | NA |

| **Gene** | **GSM657535** | **GSM657536** | **GSM657537** | **GSM657538** | **GSM657539** | **GSM657540** | **GSM657541** | **GSM657542** | **GSM657543** | **GSM657544** | **GSM657545** | **GSM657546** | **GSM657547** |
| --- | --- | --- | --- | --- | --- | --- | --- | --- | --- | --- | --- | --- | --- |
| CD24 | 7.930547 | 9.686138 | 8.802118 | 8.671836 | 9.48769 | 8.76741 | 8.385727 | 10.038974 | 8.854854 | 7.359902 | 8.62364 | 9.806745 | 9.141455 |
| CLDN3 | 7.777239 | 9.431748 | 8.065687 | 7.137559 | 8.184828 | 9.001074 | 8.083293 | 8.535643 | 7.960582 | 5.943311 | 7.958406 | 8.89152 | 7.95101 |
| C1orf106 | 6.414683 | 9.43573 | 7.726692 | 7.575829 | 7.271987 | 6.962318 | 7.889441 | 7.552158 | 7.441487 | 6.084325 | 7.72457 | 7.681943 | 7.529178 |
| CRABP2 | 8.023681 | 9.933113 | 9.678865 | 10.107572 | 11.433029 | 8.838507 | 10.559179 | 8.789288 | 10.316882 | 8.785917 | 9.424113 | 9.024976 | 10.501804 |
| SOX17 | 7.894387 | 7.897565 | 8.441009 | 6.089404 | 7.977838 | 7.594478 | 7.743102 | 8.172916 | 7.930811 | 5.768062 | 7.584164 | 7.739417 | 8.468802 |
| ELF3 | 6.542857 | 8.730384 | 6.856248 | 6.910339 | 7.843426 | 7.669665 | 7.731523 | 8.487992 | 7.30616 | 7.403329 | 6.50458 | 7.284719 | 7.27181 |
| EPCAM | 9.76264 | 8.760247 | 9.118727 | 8.375775 | 8.899593 | 9.151316 | 9.132795 | 9.374931 | 9.508229 | 6.456873 | 8.705772 | 8.573181 | 9.407032 |
| SCGB2A1 | 7.393885 | 7.409424 | 8.803372 | 7.754036 | 5.577222 | 5.599947 | 5.973162 | 4.068796 | 9.832634 | 3.79607 | 8.316188 | 8.388447 | 7.531664 |
| KLK6 | 7.205868 | 10.077232 | 7.359569 | 6.800992 | 7.927821 | 7.599254 | 8.866359 | 8.972578 | 8.786525 | 6.840992 | 7.473009 | 8.027352 | 9.262223 |
| MMP7 | 6.123709 | 7.259799 | 9.692179 | 7.101769 | 7.402242 | 6.582992 | 9.265018 | 10.353074 | 7.244328 | 6.94426 | 6.643244 | 7.259704 | 9.136371 |
| CLDN4 | 5.77531 | 7.022197 | 6.50992 | 5.802828 | 6.79468 | 6.951009 | 7.454986 | 5.87685 | 6.460987 | 6.014619 | 6.461556 | 6.85089 | 5.978669 |
| CKS2 | 8.859665 | 8.324139 | 9.670698 | 7.908681 | 8.869365 | 7.928269 | 7.841479 | 7.556396 | 10.150806 | 5.378621 | 7.774936 | 7.163663 | 9.370039 |
| CP | 9.542671 | 7.217993 | 7.965856 | 6.74465 | 10.431279 | 6.340871 | 6.712086 | 8.8226 | 7.945577 | 6.096106 | 5.681307 | 8.684816 | 6.762618 |
| PSAT1 | 6.659874 | 7.547915 | 7.002904 | 5.38099 | 6.938112 | 6.007773 | 8.339962 | 6.678583 | 7.191334 | 5.213848 | 6.126874 | 6.814508 | 6.409786 |
| MECOM | 5.194899 | 5.194215 | 5.039135 | 5.476781 | 5.122628 | 5.68424 | 5.870026 | 4.839177 | 5.273579 | 5.158701 | 5.236274 | 4.768481 | 5.288111 |
| ESRP1 | 7.962893 | 7.54524 | 6.918608 | 6.646713 | 8.609003 | 6.235429 | 7.76867 | 7.530333 | 7.52106 | 6.47085 | 6.897358 | 7.756484 | 8.139773 |
| WFDC2 | 11.83347 | 11.226998 | 10.67002 | 8.565351 | 10.40074 | 10.727077 | 11.120502 | 12.241879 | 10.334491 | 8.388461 | 10.184208 | 10.108322 | 11.938402 |
| CEP55 | 6.243631 | 6.781644 | 6.228317 | 5.703262 | 6.935823 | 6.840527 | 6.075424 | 6.974638 | 6.894997 | 4.596183 | 5.082259 | 5.208214 | 6.471341 |
| MUC1 | 7.419722 | 9.127453 | 7.506881 | 6.929991 | 8.909148 | 9.29729 | 8.617153 | 9.637246 | 7.361088 | 7.169557 | 6.455962 | 8.075228 | 8.033981 |
| MCM2 | 7.993805 | 8.352232 | 7.132697 | 6.519738 | 8.463799 | 8.736564 | 8.604742 | 7.543898 | 7.428227 | 6.318667 | 9.121723 | 7.38883 | 8.71474 |
| FAM83D | NA | NA | NA | NA | NA | NA | NA | NA | NA | NA | NA | NA | NA |
| ZWINT | 7.200054 | 8.046718 | 7.034767 | 7.60224 | 8.375525 | 7.917754 | 7.404455 | 7.319946 | 7.514989 | 5.281088 | 7.422579 | 6.720633 | 7.522177 |
| NEK2 | 5.246905 | 5.504336 | 5.462178 | 5.29549 | 5.705178 | 6.271762 | 6.027671 | 5.136571 | 6.031982 | 4.466547 | 5.260993 | 5.002393 | 5.897013 |
| BUB1B | 6.597411 | 6.22712 | 6.866386 | 6.689748 | 6.468382 | 8.044673 | 7.375493 | 6.79431 | 7.26853 | 5.893583 | 6.501214 | 6.213048 | 6.944296 |
| DLGAP5 | 5.195596 | 5.609894 | 5.678142 | 6.049311 | 6.431431 | 5.883687 | 5.765821 | 5.513549 | 6.11985 | 4.026189 | 4.623778 | 4.563106 | 6.219792 |
| MELK | 7.663949 | 7.586521 | 6.847399 | 7.055285 | 8.282692 | 8.869081 | 7.297919 | 7.208555 | 8.070597 | 6.770939 | 7.183528 | 6.818757 | 7.388354 |
| FZD10 | 5.767736 | 5.619568 | 5.186666 | 5.164847 | 3.950637 | 4.897696 | 4.462242 | 4.110731 | 4.376522 | 5.107552 | 7.356533 | 5.204659 | 4.076249 |
| LPAR3 | 5.888944 | 4.840734 | 6.382975 | 5.285193 | 6.290759 | 5.201442 | 5.593347 | 4.632709 | 5.580386 | 5.03295 | 5.48661 | 5.309227 | 6.89014 |
| ITLN1 | NA | NA | NA | NA | NA | NA | NA | NA | NA | NA | NA | NA | NA |
| LINC01105 | NA | NA | NA | NA | NA | NA | NA | NA | NA | NA | NA | NA | NA |
| ANXA8L1 | 6.476365 | 6.725586 | 6.386406 | 6.495378 | 6.525154 | 6.168976 | 7.569636 | 6.479225 | 7.214322 | 6.939842 | 6.41998 | 6.544492 | 6.413183 |
| DFNA5 | 5.764201 | 5.343836 | 5.864462 | 5.762081 | 5.085346 | 6.139745 | 5.596627 | 5.415573 | 5.495194 | 5.340148 | 5.937082 | 5.647943 | 5.359633 |
| PRG4 | 3.402277 | 3.23673 | 3.235554 | 3.543583 | 3.229963 | 3.204263 | 3.431345 | 3.237822 | 3.191223 | 4.140292 | 3.428431 | 3.548485 | 3.341749 |
| ABCA8 | 4.373617 | 4.039557 | 4.445959 | 3.611838 | 3.708213 | 3.786499 | 3.429474 | 4.091846 | 4.248569 | 3.842217 | 6.038809 | 5.648214 | 3.686786 |
| PROCR | 3.33607 | 3.666343 | 3.503972 | 3.69371 | 3.261691 | 3.609264 | 3.39827 | 3.681162 | 3.762099 | 3.088775 | 3.421579 | 3.197488 | 3.338115 |
| CHGB | 3.734019 | 3.974281 | 3.779345 | 3.804115 | 3.765385 | 3.682066 | 4.005425 | 4.016714 | 4.103257 | 4.071657 | 4.94015 | 4.7991 | 3.892727 |
| AOX1 | 5.09209 | 4.798168 | 5.410883 | 5.55993 | 4.676193 | 4.564182 | 4.712835 | 5.079164 | 5.297251 | 5.956422 | 6.457535 | 5.911398 | 5.100105 |
| CALB2 | 5.308792 | 5.594658 | 4.822434 | 5.297824 | 5.136718 | 4.812093 | 6.12013 | 5.76328 | 5.615231 | 5.643546 | 5.145854 | 5.15299 | 5.186199 |
| HAND2-AS1 | 4.489213 | 4.54049 | 4.601187 | 4.242604 | 4.472984 | 4.404124 | 4.228181 | 4.356542 | 4.201358 | 5.123034 | 4.337998 | 4.655221 | 4.643671 |
| BNC1 | 4.671225 | 4.549505 | 4.762777 | 5.612757 | 4.787216 | 4.632467 | 4.863806 | 4.842224 | 4.722152 | 5.319035 | 4.767196 | 4.710418 | 4.722009 |
| BCHE | 3.572063 | 4.157043 | 3.326508 | 3.605632 | 3.49801 | 3.378664 | 3.33696 | 3.749628 | 3.698401 | 3.659178 | 3.343713 | 3.38311 | 3.252826 |
| CLEC4M | 4.331376 | 4.23881 | 4.413975 | 4.204843 | 4.281849 | 4.229775 | 4.351012 | 4.390758 | 4.230063 | 5.008573 | 4.302029 | 4.442171 | 4.424556 |
| NPY1R | 3.294752 | 3.712402 | 3.278409 | 3.409902 | 4.024584 | 3.33578 | 3.290634 | 3.056617 | 3.250849 | 3.53313 | 3.466562 | 3.136371 | 3.164568 |
| TCEAL2 | 3.54324 | 4.008233 | 3.99681 | 3.394255 | 3.470409 | 3.539527 | 5.667655 | 4.019474 | 3.568077 | 3.473138 | 6.778989 | 5.016022 | 4.496336 |
| MNDA | 4.674659 | 3.852012 | 5.781278 | 4.004002 | 4.493398 | 3.727039 | 3.733987 | 3.887318 | 5.241543 | 3.648573 | 3.801153 | 4.501811 | 4.21629 |
| PDE8B | 5.50593 | 5.189059 | 5.12828 | 5.193609 | 5.316154 | 5.291416 | 5.244169 | 5.426957 | 5.19308 | 5.727938 | 5.592688 | 5.477542 | 5.554468 |
| REEP1 | 4.709111 | 4.364807 | 4.676796 | 5.431411 | 4.805649 | 4.866011 | 4.954958 | 5.212906 | 4.816867 | 5.799073 | 5.877291 | 4.89085 | 5.068313 |
| ADH1C | 3.618142 | 3.278123 | 3.471672 | 3.963182 | 3.51393 | 3.56482 | 3.604184 | 3.447641 | 3.840683 | 3.556172 | 3.751899 | 3.522578 | 3.532277 |
| SPOCK1 | 5.731107 | 5.868588 | 5.173981 | 6.217564 | 5.363856 | 5.156044 | 6.232391 | 5.437496 | 5.669715 | 5.617875 | 5.839613 | 5.181194 | 6.133418 |
| KDR | 4.254048 | 4.252698 | 4.37928 | 4.098048 | 4.224736 | 4.201249 | 4.500805 | 4.277482 | 4.206477 | 4.699512 | 4.234651 | 4.150963 | 4.262732 |
| GADL1 | NA | NA | NA | NA | NA | NA | NA | NA | NA | NA | NA | NA | NA |
| SFRP1 | 5.663941 | 4.798461 | 4.77575 | 4.80494 | 4.717379 | 4.845306 | 5.952118 | 4.863311 | 5.362793 | 5.679866 | 7.222677 | 5.067825 | 4.552964 |
| BAMBI | 4.651282 | 4.822586 | 5.185581 | 5.037591 | 4.725273 | 5.06473 | 5.447261 | 4.786684 | 5.131851 | 5.487345 | 6.838534 | 7.1509 | 4.401654 |
| LGALS2 | 4.335624 | 3.935957 | 3.93287 | 3.82122 | 4.080548 | 3.649915 | 3.906463 | 3.677909 | 3.781462 | 5.094554 | 3.990868 | 4.023161 | 4.397356 |
| DIRAS3 | 4.146019 | 4.11752 | 5.297369 | 4.073503 | 4.170224 | 4.61158 | 4.547437 | 4.267438 | 4.877288 | 4.495367 | 6.57525 | 5.556803 | 4.025388 |
| C21orf62 | 4.460448 | 4.204903 | 4.466153 | 4.761045 | 4.487864 | 4.303098 | 4.353199 | 4.519933 | 4.413587 | 5.895821 | 4.883334 | 4.463667 | 4.746186 |
| TCEAL7 | NA | NA | NA | NA | NA | NA | NA | NA | NA | NA | NA | NA | NA |
| OGN | 3.554787 | 3.163879 | 2.972712 | 3.159108 | 2.966736 | 2.860185 | 2.957086 | 2.972256 | 3.205132 | 3.451957 | 4.014297 | 4.070136 | 2.838927 |
| SYT4 | NA | NA | NA | NA | NA | NA | NA | NA | NA | NA | NA | NA | NA |
| LOC100506718 | 5.849906 | 5.257396 | 5.099465 | 5.441051 | 4.446832 | 4.97047 | 4.917345 | 5.080219 | 5.017344 | 5.634269 | 7.773374 | 6.563107 | 5.036669 |
| GPRASP1 | 4.852716 | 4.755634 | 4.925581 | 4.713621 | 4.513 | 4.870965 | 4.757819 | 4.909064 | 4.3424 | 4.599257 | 6.490794 | 6.256881 | 4.447647 |
| NELL2 | 5.669738 | 4.996636 | 5.686433 | 6.462527 | 5.513356 | 5.598411 | 5.72176 | 5.72131 | 5.808963 | 6.256727 | 5.574491 | 5.531868 | 5.555455 |
| AADACL2 | NA | NA | NA | NA | NA | NA | NA | NA | NA | NA | NA | NA | NA |
| GHR | 3.734818 | 3.836892 | 4.042763 | 3.442342 | 3.502737 | 3.470248 | 4.775792 | 3.341755 | 4.052967 | 3.488228 | 3.822386 | 3.773702 | 3.66631 |
| ADH1B | 4.97553 | 3.662708 | 3.572908 | 3.637467 | 3.972367 | 3.522914 | 3.572883 | 3.744488 | 4.484597 | 3.899349 | 4.109886 | 3.763483 | 3.644607 |
| MGARP | NA | NA | NA | NA | NA | NA | NA | NA | NA | NA | NA | NA | NA |
| IGFBP6 | 6.720861 | 5.958707 | 6.08936 | 6.441354 | 6.131575 | 7.495023 | 6.440294 | 6.158558 | 5.990672 | 5.579278 | 7.137298 | 7.303611 | 6.514278 |
| GFPT2 | 5.707369 | 6.11995 | 5.53821 | 5.603154 | 5.913588 | 5.472045 | 6.746486 | 6.690187 | 6.376999 | 5.942181 | 6.038599 | 5.735352 | 5.479951 |
| OLFML1 | 5.754257 | 5.910539 | 5.307836 | 5.024295 | 5.032757 | 5.066695 | 5.095523 | 5.221184 | 5.360808 | 5.291373 | 6.510356 | 5.965747 | 5.208732 |
| NAP1L3 | 3.734849 | 4.33169 | 4.442835 | 3.141262 | 3.442672 | 3.633589 | 3.828113 | 3.476208 | 3.803358 | 3.283413 | 4.892426 | 4.246449 | 3.502514 |
| HBB | 9.344827 | 9.323435 | 10.21256 | 6.460129 | 10.285981 | 5.750263 | 10.135684 | 9.584848 | 11.579445 | 7.862471 | 6.967845 | 9.492066 | 9.221326 |
| DAPK1-IT1 | NA | NA | NA | NA | NA | NA | NA | NA | NA | NA | NA | NA | NA |
| ALDH1A1 | 4.360949 | 3.650781 | 4.090273 | 3.362692 | 3.600178 | 3.74227 | 3.435884 | 3.739988 | 4.300114 | 3.457244 | 5.147221 | 5.921331 | 5.635475 |
| LRRN4 | NA | NA | NA | NA | NA | NA | NA | NA | NA | NA | NA | NA | NA |
| HAS1 | 4.554375 | 5.025875 | 4.541867 | 5.300028 | 5.244979 | 4.570464 | 6.313542 | 5.784101 | 6.343047 | 5.61369 | 5.375889 | 5.090919 | 4.807913 |
| LXN | 6.360327 | 6.921261 | 7.358427 | 5.912889 | 7.264095 | 4.351341 | 6.913198 | 6.809315 | 8.394835 | 5.301435 | 6.875215 | 7.089048 | 7.083868 |
| CLDN15 | 7.479239 | 7.356893 | 7.26429 | 7.857656 | 7.367644 | 7.819075 | 7.625815 | 7.282436 | 7.445955 | 7.740764 | 7.308735 | 7.40353 | 7.54452 |
| PDGFD | 6.63925 | 6.436219 | 6.281357 | 5.606562 | 5.65468 | 5.353764 | 5.468615 | 5.673499 | 6.342844 | 5.424735 | 6.575178 | 6.456334 | 5.887654 |
| PRSS35 | NA | NA | NA | NA | NA | NA | NA | NA | NA | NA | NA | NA | NA |
| HBA2 | 9.109676 | 10.100181 | 9.343996 | 6.790826 | 10.208676 | 6.251269 | 10.567066 | 9.656514 | 10.428664 | 7.76483 | 7.243013 | 8.714173 | 8.923127 |
| WNT2B | 4.63476 | 4.692336 | 4.799702 | 5.034003 | 4.777606 | 4.709245 | 4.990873 | 4.700861 | 4.892656 | 5.491755 | 5.084 | 4.790583 | 4.76664 |
| CHRDL1 | 5.18807 | 4.784303 | 5.456672 | 4.880051 | 5.456263 | 5.22221 | 4.552279 | 5.762694 | 5.162837 | 5.07997 | 4.7835 | 5.051207 | 4.805861 |
| LOC101930363 | 3.325276 | 3.423124 | 5.16291 | 3.3011 | 3.999659 | 3.922156 | 3.396362 | 3.678684 | 3.443585 | 3.94791 | 3.962337 | 4.408271 | 3.720067 |
| PAPSS2 | 5.27107 | 4.953466 | 4.982681 | 5.103844 | 4.90483 | 4.443131 | 4.882434 | 5.098857 | 5.027455 | 6.385415 | 6.18531 | 5.245043 | 4.678483 |
| FLNC | 6.286439 | 5.856215 | 5.974417 | 6.472463 | 5.821133 | 5.754942 | 5.924986 | 6.73083 | 6.101326 | 6.512964 | 6.662843 | 5.814555 | 5.634667 |
| PLPP1 | 6.436293 | 6.093352 | 6.168921 | 5.428726 | 5.604673 | 5.484756 | 5.569516 | 6.428711 | 6.636199 | 5.499443 | 5.734586 | 5.709892 | 5.505675 |
| AQP9 | 6.36195 | 5.483366 | 7.082324 | 5.97136 | 6.983425 | 5.323938 | 6.121929 | 6.26372 | 5.682895 | 6.201057 | 5.744666 | 6.201773 | 6.786302 |
| TMEM255A | 3.073182 | 3.098961 | 3.095862 | 3.009662 | 3.062682 | 2.926182 | 2.854089 | 2.894758 | 2.933701 | 3.02317 | 3.775041 | 3.692338 | 2.928478 |
| HOXC6 | 6.402459 | 5.852387 | 6.69055 | 6.365194 | 5.784626 | 7.457345 | 6.720039 | 7.126543 | 6.847157 | 6.260188 | 8.602904 | 7.155261 | 6.137082 |
| LOC101926921 | 7.905139 | 6.801062 | 6.528502 | 6.42356 | 6.858066 | 5.600817 | 6.21733 | 7.159464 | 6.632498 | 6.186238 | 8.171352 | 7.201391 | 7.25172 |
| PCOLCE2 | 3.184046 | 3.121488 | 3.326555 | 3.418255 | 3.381175 | 3.860899 | 3.186788 | 3.351091 | 3.457739 | 3.130296 | 4.234452 | 3.203826 | 3.371806 |
| RNASE4 | 4.568751 | 4.387008 | 5.210702 | 4.38195 | 3.929085 | 4.006294 | 4.256303 | 4.333707 | 4.839849 | 4.455245 | 5.527513 | 5.631361 | 4.135836 |
| TCF21 | 3.843865 | 4.544728 | 4.48046 | 4.17144 | 3.713355 | 4.119064 | 3.964231 | 4.172228 | 4.034132 | 4.326156 | 5.976884 | 6.049778 | 3.771325 |
| LOC101928635 | 5.528204 | 5.663895 | 5.09079 | 5.373585 | 5.852189 | 5.264508 | 5.271811 | 6.117784 | 6.808394 | 5.955949 | 5.129394 | 5.3253 | 8.977111 |
| PKD2 | 4.741515 | 4.985719 | 4.256242 | 3.959502 | 4.162519 | 4.13357 | 3.992644 | 5.039231 | 4.308364 | 3.837782 | 4.505184 | 4.67265 | 3.86098 |
| WNT5A | 4.593314 | 4.503163 | 5.145194 | 4.954665 | 4.270116 | 4.540999 | 5.760597 | 4.628099 | 4.093737 | 4.272069 | 6.584428 | 5.702596 | 4.156537 |
| FGF13 | 4.62712 | 4.375053 | 5.249463 | 4.187851 | 4.222999 | 5.013807 | 4.423446 | 4.366252 | 4.204334 | 4.468001 | 4.666482 | 4.587708 | 5.28623 |
| LHX2 | 3.807731 | 3.802135 | 3.67522 | 4.305891 | 3.73264 | 3.903717 | 3.903295 | 3.678874 | 3.828025 | 4.317377 | 3.90449 | 3.797893 | 3.757166 |
| ATP10D | 4.560488 | 4.655747 | 4.660941 | 4.698214 | 4.266062 | 3.860899 | 4.405809 | 4.828809 | 4.639153 | 4.555035 | 4.986913 | 4.780969 | 4.43927 |
| ARHGAP18 | NA | NA | NA | NA | NA | NA | NA | NA | NA | NA | NA | NA | NA |
| LOC286191 | NA | NA | NA | NA | NA | NA | NA | NA | NA | NA | NA | NA | NA |
| EFEMP1 | 7.077178 | 5.538819 | 7.281579 | 4.958739 | 5.258205 | 4.183155 | 4.537388 | 5.936067 | 6.897537 | 4.877192 | 7.550135 | 5.84916 | 5.596713 |
| LOC100996760 | NA | NA | NA | NA | NA | NA | NA | NA | NA | NA | NA | NA | NA |

| **Gene** | **GSM657548** | **GSM657549** | **GSM657550** | **GSM657551** | **GSM657552** | **GSM657553** | **GSM657554** | **GSM657555** | **GSM657556** | **GSM657557** | **GSM657558** | **GSM657559** | **GSM657560** |
| --- | --- | --- | --- | --- | --- | --- | --- | --- | --- | --- | --- | --- | --- |
| CD24 | 7.459493 | 10.546658 | 8.751229 | 9.207136 | 7.740512 | 9.480378 | 9.288745 | 9.531678 | 6.804335 | 8.353182 | 7.902652 | 7.023707 | 7.078753 |
| CLDN3 | 6.321483 | 8.41648 | 9.080555 | 8.175114 | 8.860662 | 7.812411 | 8.355825 | 7.469398 | 8.466101 | 9.287777 | 7.486046 | 6.20955 | 7.541418 |
| C1orf106 | 7.071651 | 7.828563 | 8.675809 | 9.268803 | 8.023841 | 6.583947 | 7.54767 | 7.503321 | 7.110883 | 7.410766 | 8.371085 | 7.36041 | 6.778156 |
| CRABP2 | 9.838543 | 10.155514 | 11.729544 | 10.364854 | 9.704895 | 9.355666 | 10.428451 | 10.25029 | 11.728837 | 8.61253 | 10.598683 | 9.920527 | 9.227312 |
| SOX17 | 6.56916 | 6.488009 | 8.007851 | 6.998727 | 7.963105 | 6.703868 | 7.382473 | 7.226187 | 6.850331 | 8.185631 | 8.21078 | 7.602283 | 7.540678 |
| ELF3 | 7.286729 | 6.957709 | 8.012053 | 8.427579 | 6.240358 | 6.870111 | 8.118221 | 7.041523 | 8.008111 | 6.800682 | 7.284814 | 7.075135 | 6.621431 |
| EPCAM | 6.566198 | 9.701806 | 9.293414 | 9.356312 | 8.984924 | 8.850242 | 9.116053 | 9.232176 | 8.821273 | 9.211869 | 8.82861 | 8.059849 | 8.72361 |
| SCGB2A1 | 8.94558 | 7.952775 | 10.025751 | 10.230412 | 7.155639 | 7.550754 | 8.350837 | 9.711115 | 11.245403 | 9.252422 | 7.820013 | 8.623384 | 3.917241 |
| KLK6 | 8.194432 | 6.012875 | 9.4284 | 9.890025 | 8.578955 | 8.857132 | 9.345502 | 7.259709 | 6.447343 | 8.608191 | 5.949674 | 7.650773 | 8.361529 |
| MMP7 | 8.087218 | 6.204485 | 8.075605 | 10.331333 | 7.540775 | 8.557909 | 7.703519 | 10.441753 | 4.798674 | 8.243274 | 6.22602 | 6.858815 | 7.47843 |
| CLDN4 | 5.938848 | 6.578952 | 6.800981 | 7.223271 | 7.744709 | 7.019527 | 5.890445 | 6.531607 | 5.007015 | 6.801746 | 6.421629 | 4.856627 | 6.955424 |
| CKS2 | 7.02982 | 10.279011 | 9.79223 | 7.741057 | 9.736575 | 8.668397 | 7.700374 | 9.449461 | 6.60848 | 9.098491 | 8.729057 | 7.251848 | 7.409819 |
| CP | 6.690212 | 8.392045 | 9.648659 | 7.959527 | 6.680941 | 8.12251 | 6.782196 | 7.590051 | 7.486456 | 8.059442 | 7.844387 | 6.361554 | 6.215055 |
| PSAT1 | 5.431957 | 7.119014 | 7.737609 | 5.563042 | 7.600669 | 7.937125 | 4.896297 | 5.556329 | 5.137593 | 6.983437 | 4.917558 | 4.602387 | 5.680419 |
| MECOM | 4.790069 | 5.532616 | 5.0758 | 5.525878 | 5.187506 | 4.649361 | 5.057942 | 5.129856 | 5.786022 | 5.353171 | 5.316337 | 5.227407 | 4.910011 |
| ESRP1 | 5.951365 | 6.871511 | 7.19167 | 6.747408 | 7.207978 | 6.443685 | 7.599087 | 6.60687 | 7.325065 | 6.65926 | 6.610012 | 6.449165 | 6.597114 |
| WFDC2 | 9.792006 | 11.378076 | 11.104136 | 11.514543 | 9.898847 | 8.991123 | 10.734494 | 10.925232 | 11.255974 | 11.37423 | 10.981665 | 9.950085 | 9.375334 |
| CEP55 | 4.461441 | 7.436696 | 7.496831 | 5.116654 | 7.014948 | 6.248241 | 7.186449 | 6.283129 | 6.137441 | 5.773624 | 6.856307 | 5.472264 | 4.904583 |
| MUC1 | 7.611534 | 9.259516 | 9.181592 | 9.545086 | 6.716855 | 8.331187 | 8.707176 | 7.824925 | 7.968537 | 8.567965 | 9.072681 | 7.464012 | 6.543237 |
| MCM2 | 6.201259 | 7.772405 | 8.553832 | 7.256071 | 7.77809 | 7.050885 | 6.717899 | 7.128248 | 6.534408 | 7.333805 | 9.322426 | 6.159642 | 8.254731 |
| FAM83D | NA | NA | NA | NA | NA | NA | NA | NA | NA | NA | NA | NA | NA |
| ZWINT | 4.531963 | 8.714948 | 8.700871 | 7.657359 | 7.512658 | 6.312531 | 7.51721 | 6.662963 | 7.160004 | 7.893349 | 8.554451 | 7.054733 | 7.064562 |
| NEK2 | 4.354132 | 6.499132 | 6.261092 | 5.473565 | 5.974441 | 5.017233 | 5.010998 | 5.398199 | 5.269605 | 5.46806 | 5.715643 | 5.302105 | 4.97591 |
| BUB1B | 5.680944 | 8.637076 | 8.284074 | 6.70919 | 7.548942 | 6.372808 | 7.535607 | 6.930994 | 7.179803 | 6.578228 | 8.192727 | 7.627305 | 6.551852 |
| DLGAP5 | 3.982412 | 7.032041 | 6.66347 | 4.444671 | 7.206641 | 4.797885 | 5.159747 | 5.74148 | 4.40925 | 6.253281 | 5.952826 | 4.377599 | 4.87557 |
| MELK | 6.656363 | 8.449677 | 8.410713 | 7.5178 | 7.698775 | 7.108959 | 6.805639 | 6.917648 | 7.016905 | 7.407111 | 8.554597 | 7.207728 | 6.942818 |
| FZD10 | 4.287787 | 4.153681 | 4.771938 | 4.127234 | 4.268334 | 4.242818 | 5.021294 | 4.647268 | 4.728798 | 4.561914 | 4.208702 | 5.964761 | 5.079746 |
| LPAR3 | 5.351085 | 4.910932 | 5.559533 | 4.755553 | 5.351827 | 4.839592 | 4.886597 | 5.428245 | 5.2412 | 6.337097 | 4.751853 | 5.023007 | 4.874582 |
| ITLN1 | NA | NA | NA | NA | NA | NA | NA | NA | NA | NA | NA | NA | NA |
| LINC01105 | NA | NA | NA | NA | NA | NA | NA | NA | NA | NA | NA | NA | NA |
| ANXA8L1 | 6.68169 | 6.758561 | 6.879005 | 5.863747 | 6.29067 | 7.155213 | 6.600744 | 6.578685 | 6.738037 | 6.467813 | 6.487099 | 6.44473 | 6.365824 |
| DFNA5 | 5.853335 | 5.942169 | 5.453846 | 5.768758 | 5.228059 | 6.422942 | 5.574545 | 6.009673 | 5.961195 | 5.321748 | 5.452793 | 5.960782 | 5.672321 |
| PRG4 | 3.832414 | 3.267807 | 3.149524 | 3.273002 | 3.679373 | 3.200583 | 3.39841 | 3.358862 | 3.70163 | 3.522117 | 3.288005 | 3.655715 | 3.34518 |
| ABCA8 | 6.338246 | 4.493862 | 3.777808 | 4.307445 | 4.361762 | 5.736963 | 3.993536 | 4.045184 | 3.586823 | 3.733374 | 3.719053 | 3.653785 | 5.572209 |
| PROCR | 3.331036 | 3.606993 | 3.555589 | 3.470114 | 3.749036 | 4.183896 | 3.685077 | 3.61775 | 3.227486 | 3.48989 | 3.70341 | 3.395032 | 3.575824 |
| CHGB | 4.509519 | 3.99787 | 3.644395 | 3.823549 | 3.91958 | 4.09696 | 3.74474 | 4.125288 | 3.792804 | 3.949691 | 3.888802 | 4.476797 | 3.886277 |
| AOX1 | 5.827671 | 4.988241 | 4.562858 | 5.298718 | 4.960617 | 5.606945 | 5.230981 | 5.061701 | 5.349303 | 5.154786 | 5.101515 | 5.630831 | 5.115151 |
| CALB2 | 5.509284 | 5.504668 | 5.35131 | 4.997023 | 5.714246 | 6.244064 | 6.020779 | 5.623182 | 4.964651 | 5.433581 | 6.031328 | 5.302568 | 6.874259 |
| HAND2-AS1 | 4.490159 | 4.422312 | 4.426427 | 4.630704 | 4.296948 | 4.622819 | 4.733705 | 4.491115 | 4.448019 | 4.335906 | 4.375347 | 4.499664 | 5.945755 |
| BNC1 | 5.536156 | 4.899893 | 4.825552 | 4.74863 | 4.829557 | 4.731078 | 5.085366 | 4.78866 | 4.960211 | 4.764152 | 4.898926 | 4.842947 | 4.66624 |
| BCHE | 3.585679 | 3.877307 | 3.424962 | 3.17832 | 4.408934 | 6.086659 | 4.456437 | 4.002527 | 3.375484 | 3.300166 | 3.620574 | 3.548628 | 6.522437 |
| CLEC4M | 4.492024 | 4.45975 | 4.244328 | 4.221719 | 4.272872 | 4.198775 | 4.243343 | 4.329485 | 4.407854 | 4.431954 | 4.205854 | 4.624032 | 4.53491 |
| NPY1R | 3.311095 | 3.060196 | 3.51264 | 3.308876 | 3.375893 | 3.350782 | 3.205426 | 3.548475 | 3.305728 | 3.231188 | 3.23298 | 3.379172 | 3.763469 |
| TCEAL2 | 4.944727 | 3.938466 | 4.093856 | 4.09003 | 3.988056 | 5.257347 | 4.19003 | 3.652588 | 3.650581 | 3.65937 | 3.418911 | 3.724962 | 5.690894 |
| MNDA | 3.970433 | 4.528615 | 5.122541 | 4.037147 | 3.98097 | 5.238728 | 4.063214 | 5.234155 | 3.903949 | 4.232053 | 5.825096 | 3.669522 | 3.813363 |
| PDE8B | 5.574095 | 5.481278 | 4.882071 | 5.509718 | 5.138117 | 5.378586 | 4.987054 | 5.334101 | 5.52483 | 5.246722 | 5.280939 | 5.419889 | 5.648605 |
| REEP1 | 5.4621 | 4.81251 | 5.292685 | 4.91741 | 5.304708 | 4.953013 | 4.582478 | 5.162949 | 4.747523 | 5.025648 | 5.997503 | 5.167969 | 6.063277 |
| ADH1C | 3.725174 | 3.444419 | 3.744365 | 3.508664 | 3.671362 | 3.746285 | 3.450215 | 4.120877 | 3.430538 | 3.633895 | 3.915221 | 3.801491 | 3.830825 |
| SPOCK1 | 5.227442 | 5.298665 | 5.211199 | 5.327557 | 5.272799 | 6.439924 | 5.963694 | 5.778983 | 5.645227 | 5.224013 | 5.445251 | 5.499005 | 6.448579 |
| KDR | 4.296313 | 4.317322 | 4.450012 | 4.443191 | 4.148337 | 4.772874 | 4.674143 | 4.164312 | 4.293391 | 4.182528 | 4.344571 | 4.263904 | 4.444607 |
| GADL1 | NA | NA | NA | NA | NA | NA | NA | NA | NA | NA | NA | NA | NA |
| SFRP1 | 5.105456 | 4.766011 | 4.949244 | 5.67698 | 4.770051 | 5.967534 | 5.110734 | 4.770505 | 4.988617 | 4.912159 | 4.751177 | 5.019796 | 5.311458 |
| BAMBI | 5.883885 | 4.586636 | 4.447917 | 4.580498 | 4.75339 | 5.763128 | 4.728929 | 4.847277 | 4.667017 | 4.96361 | 4.54504 | 5.265638 | 4.825526 |
| LGALS2 | 4.604551 | 4.202686 | 3.685086 | 3.888409 | 3.960672 | 3.710805 | 4.404766 | 4.510727 | 4.069519 | 3.996003 | 4.596385 | 4.607049 | 4.638871 |
| DIRAS3 | 5.281671 | 3.968198 | 4.308048 | 4.843797 | 4.384781 | 6.485873 | 4.481333 | 4.233289 | 4.543958 | 4.341816 | 4.24042 | 4.827351 | 4.103347 |
| C21orf62 | 4.912246 | 4.711902 | 4.086092 | 4.462157 | 4.394928 | 4.35456 | 4.416667 | 4.61643 | 4.93053 | 4.494396 | 4.445667 | 4.666964 | 4.556231 |
| TCEAL7 | NA | NA | NA | NA | NA | NA | NA | NA | NA | NA | NA | NA | NA |
| OGN | 3.727471 | 3.129895 | 3.012063 | 3.446367 | 3.222298 | 4.718689 | 3.276273 | 3.023153 | 3.29004 | 3.106889 | 3.211676 | 3.494504 | 3.614359 |
| SYT4 | NA | NA | NA | NA | NA | NA | NA | NA | NA | NA | NA | NA | NA |
| LOC100506718 | 6.503477 | 5.628114 | 4.648806 | 5.480795 | 5.040079 | 6.233623 | 5.514857 | 5.082007 | 5.439576 | 5.191597 | 4.70643 | 5.523693 | 5.608732 |
| GPRASP1 | 5.556073 | 4.731203 | 4.43627 | 5.394791 | 4.853956 | 5.235811 | 4.905608 | 4.707222 | 5.104786 | 4.92352 | 4.497782 | 5.083631 | 6.216101 |
| NELL2 | 5.806101 | 5.59962 | 5.448955 | 5.455672 | 6.689879 | 5.445616 | 5.535095 | 5.952557 | 5.985883 | 5.526215 | 6.465579 | 5.883286 | 6.16478 |
| AADACL2 | NA | NA | NA | NA | NA | NA | NA | NA | NA | NA | NA | NA | NA |
| GHR | 3.701633 | 3.394072 | 3.690015 | 3.326345 | 3.805803 | 4.953839 | 3.677088 | 3.462615 | 3.836507 | 3.592411 | 3.629112 | 3.467502 | 4.911584 |
| ADH1B | 3.995872 | 3.590039 | 3.566097 | 3.627161 | 4.309845 | 5.03202 | 3.926836 | 4.601292 | 3.704204 | 3.55153 | 3.933821 | 3.691541 | 4.887864 |
| MGARP | NA | NA | NA | NA | NA | NA | NA | NA | NA | NA | NA | NA | NA |
| IGFBP6 | 7.335263 | 5.951871 | 6.280146 | 6.023637 | 6.329926 | 6.946177 | 6.705946 | 6.054975 | 5.261381 | 6.347026 | 6.464321 | 6.557427 | 7.477624 |
| GFPT2 | 5.824601 | 5.670314 | 5.534319 | 5.324228 | 5.61708 | 6.861731 | 6.069367 | 5.227201 | 5.248002 | 5.74154 | 6.052219 | 6.145874 | 6.090095 |
| OLFML1 | 5.396304 | 5.229309 | 5.19294 | 5.445508 | 5.155354 | 6.546432 | 6.413832 | 5.188309 | 5.325259 | 5.301727 | 5.357177 | 5.681761 | 5.410338 |
| NAP1L3 | 3.745249 | 3.559995 | 4.488999 | 4.047409 | 4.126158 | 5.102956 | 3.816453 | 3.59218 | 3.551884 | 3.607034 | 3.500777 | 3.639846 | 4.363498 |
| HBB | 10.779091 | 9.289043 | 8.949422 | 10.038788 | 11.619231 | 11.374553 | 7.040307 | 11.622951 | 6.470782 | 10.070368 | 10.289225 | 6.10348 | 7.943941 |
| DAPK1-IT1 | NA | NA | NA | NA | NA | NA | NA | NA | NA | NA | NA | NA | NA |
| ALDH1A1 | 5.037987 | 3.659981 | 5.33175 | 3.525887 | 4.145489 | 5.146001 | 3.499323 | 3.667204 | 3.427254 | 3.642847 | 3.45378 | 3.938352 | 5.37646 |
| LRRN4 | NA | NA | NA | NA | NA | NA | NA | NA | NA | NA | NA | NA | NA |
| HAS1 | 6.731559 | 5.16201 | 4.830619 | 4.883879 | 5.944602 | 6.208877 | 5.082758 | 5.082744 | 5.138199 | 4.992864 | 5.106344 | 5.171711 | 5.037415 |
| LXN | 6.509719 | 7.512163 | 7.014498 | 6.588899 | 7.256117 | 9.159045 | 7.051245 | 7.206189 | 5.372048 | 6.339678 | 5.581989 | 4.90638 | 6.40511 |
| CLDN15 | 7.455845 | 7.535135 | 7.253437 | 7.183122 | 7.813814 | 7.700659 | 7.518375 | 7.694673 | 7.91593 | 7.754891 | 7.697033 | 7.582572 | 7.406593 |
| PDGFD | 6.93421 | 6.006213 | 5.826493 | 5.644465 | 6.354854 | 9.315178 | 6.189263 | 5.966542 | 5.670456 | 5.323001 | 6.174086 | 5.556812 | 5.223271 |
| PRSS35 | NA | NA | NA | NA | NA | NA | NA | NA | NA | NA | NA | NA | NA |
| HBA2 | 9.871349 | 8.711936 | 7.999723 | 10.736078 | 10.011531 | 10.870594 | 7.738127 | 10.591033 | 7.217693 | 9.842927 | 10.323682 | 7.389676 | 9.020064 |
| WNT2B | 5.289475 | 4.884022 | 4.843188 | 4.638263 | 4.613473 | 4.699589 | 4.830424 | 5.266464 | 5.078152 | 4.966909 | 4.760058 | 5.048781 | 4.943811 |
| CHRDL1 | 5.49087 | 4.895061 | 4.816785 | 4.709099 | 5.52777 | 6.471378 | 5.150625 | 5.380601 | 5.287573 | 5.777843 | 4.884586 | 4.945971 | 8.317485 |
| LOC101930363 | 4.100019 | 3.268332 | 3.31695 | 3.956941 | 3.431835 | 3.597542 | 3.579536 | 3.456328 | 3.855008 | 5.106781 | 3.466641 | 4.716253 | 3.573857 |
| PAPSS2 | 5.428165 | 5.501669 | 4.982439 | 5.046794 | 5.086562 | 5.776888 | 5.031915 | 5.145432 | 4.848217 | 4.970307 | 4.93146 | 5.003561 | 4.779497 |
| FLNC | 6.23009 | 6.013169 | 6.074149 | 6.135406 | 5.833107 | 6.637391 | 6.275244 | 5.625056 | 5.727528 | 6.117718 | 5.666385 | 5.812936 | 8.746377 |
| PLPP1 | 5.431226 | 6.078884 | 5.609759 | 5.875111 | 6.480667 | 7.70411 | 6.318093 | 5.946877 | 5.275807 | 5.472696 | 5.985729 | 5.170198 | 7.057324 |
| AQP9 | 6.10151 | 6.431935 | 5.649362 | 5.768394 | 5.465611 | 6.53226 | 5.804986 | 6.891101 | 6.115559 | 5.935098 | 5.971856 | 6.014642 | 5.614132 |
| TMEM255A | 3.708713 | 2.961425 | 3.050004 | 3.045401 | 2.957551 | 3.134837 | 3.043555 | 3.21985 | 2.950476 | 3.031701 | 3.092033 | 3.002151 | 3.128273 |
| HOXC6 | 7.005913 | 7.15188 | 6.119843 | 6.860084 | 5.73091 | 7.476474 | 6.575179 | 5.966451 | 6.007455 | 7.031053 | 7.042623 | 6.668015 | 5.781243 |
| LOC101926921 | 6.113112 | 7.33775 | 6.389415 | 6.406226 | 5.938861 | 7.65987 | 6.848513 | 7.282758 | 6.486572 | 7.028765 | 7.630191 | 6.688525 | 6.574274 |
| PCOLCE2 | 3.335129 | 3.345613 | 3.504627 | 3.309269 | 3.306811 | 3.743038 | 3.203582 | 3.343588 | 3.124427 | 3.143423 | 3.291914 | 3.120476 | 3.984094 |
| RNASE4 | 5.618931 | 4.235697 | 4.228784 | 4.291852 | 4.809166 | 5.771564 | 4.004803 | 4.586856 | 4.192153 | 4.26731 | 4.517743 | 4.253458 | 5.239145 |
| TCF21 | 5.740791 | 4.185726 | 3.807723 | 4.946274 | 4.064949 | 4.999117 | 3.972396 | 4.225019 | 3.915224 | 4.78229 | 4.009629 | 4.774609 | 4.904624 |
| LOC101928635 | 6.02282 | 5.343083 | 5.383588 | 5.256226 | 6.247612 | 6.724874 | 5.916806 | 5.597109 | 5.375427 | 5.099236 | 7.409724 | 5.495842 | 6.931174 |
| PKD2 | 4.389293 | 4.188356 | 4.248094 | 4.002912 | 4.211815 | 5.66126 | 4.70188 | 3.9821 | 4.301572 | 4.235472 | 3.807802 | 4.669909 | 4.860286 |
| WNT5A | 4.586747 | 4.950462 | 5.584779 | 4.857074 | 4.709588 | 4.784857 | 4.50853 | 4.418681 | 4.67311 | 4.742038 | 4.600176 | 5.576388 | 4.265056 |
| FGF13 | 4.308373 | 4.104816 | 4.328997 | 4.467976 | 4.075754 | 4.577574 | 4.074017 | 4.518148 | 4.457887 | 4.402421 | 6.011058 | 4.015298 | 5.047443 |
| LHX2 | 4.107095 | 3.808874 | 3.848019 | 3.710493 | 5.148918 | 3.82563 | 3.677189 | 3.831033 | 4.040023 | 3.912939 | 5.049759 | 3.875669 | 4.115936 |
| ATP10D | 4.810191 | 4.643207 | 4.709174 | 4.643636 | 4.546799 | 5.171956 | 4.746606 | 4.632771 | 4.684097 | 4.609029 | 4.606542 | 4.415145 | 4.717819 |
| ARHGAP18 | NA | NA | NA | NA | NA | NA | NA | NA | NA | NA | NA | NA | NA |
| LOC286191 | NA | NA | NA | NA | NA | NA | NA | NA | NA | NA | NA | NA | NA |
| EFEMP1 | 6.488495 | 6.477048 | 4.972907 | 5.455667 | 5.985723 | 7.746237 | 5.683494 | 5.99687 | 5.82045 | 4.860427 | 5.172614 | 4.86614 | 5.695056 |
| LOC100996760 | NA | NA | NA | NA | NA | NA | NA | NA | NA | NA | NA | NA | NA |

| **Gene** | **GSM657561** | **GSM657562** | **GSM657563** | **GSM657564** | **GSM657565** | **GSM657566** | **GSM657567** | **GSM657568** | **GSM657569** | **GSM657570** | **GSM657571** | **GSM657572** | **GSM657573** |
| --- | --- | --- | --- | --- | --- | --- | --- | --- | --- | --- | --- | --- | --- |
| CD24 | 8.369028 | 10.057633 | 9.042232 | 7.954698 | 9.318036 | 9.370156 | 6.920721 | 8.130971 | 9.463822 | 8.038273 | 9.760191 | 8.34459 | 7.760788 |
| CLDN3 | 8.559103 | 8.363006 | 9.506302 | 7.715871 | 9.096018 | 6.801673 | 7.798914 | 8.681782 | 7.756774 | 6.657972 | 9.189629 | 8.232674 | 7.134747 |
| C1orf106 | 8.052869 | 6.945025 | 7.855293 | 6.83459 | 7.699353 | 6.963926 | 7.644804 | 7.87245 | 8.856774 | 6.296772 | 8.027061 | 7.035291 | 7.087761 |
| CRABP2 | 9.484575 | 10.614844 | 10.378562 | 10.082433 | 10.978631 | 9.333631 | 9.639524 | 9.499468 | 8.044092 | 7.899922 | 8.697566 | 8.740362 | 7.714707 |
| SOX17 | 8.345996 | 7.052051 | 8.408712 | 7.40212 | 7.715502 | 7.24857 | 7.760296 | 7.419982 | 8.762861 | 6.812813 | 7.567454 | 8.342404 | 8.01974 |
| ELF3 | 5.915256 | 7.162878 | 7.840511 | 6.133688 | 7.695255 | 6.560824 | 6.930969 | 8.078531 | 7.602669 | 6.820157 | 7.024873 | 7.246347 | 7.735373 |
| EPCAM | 9.594958 | 8.77892 | 9.563066 | 8.963077 | 8.799232 | 7.980566 | 8.709735 | 8.520692 | 9.375626 | 6.624042 | 9.259106 | 9.435046 | 8.81643 |
| SCGB2A1 | 5.54916 | 8.066924 | 11.274409 | 8.09293 | 8.975198 | 12.576013 | 4.773118 | 8.735579 | 8.871254 | 8.246185 | 5.490496 | 6.639793 | 9.268409 |
| KLK6 | 9.194419 | 9.089875 | 10.476864 | 9.339797 | 8.549819 | 6.415119 | 10.484803 | 8.166116 | 8.601977 | 5.450611 | 8.823851 | 6.946585 | 6.160472 |
| MMP7 | 7.62351 | 7.781031 | 8.952574 | 10.094302 | 8.546539 | 8.708091 | 5.480742 | 6.961469 | 12.425528 | 7.696548 | 7.44879 | 8.665004 | 7.58771 |
| CLDN4 | 5.849147 | 6.51229 | 7.405669 | 5.470999 | 6.796476 | 5.573932 | 5.915569 | 6.808838 | 7.536447 | 5.374867 | 6.713614 | 6.483668 | 5.999349 |
| CKS2 | 7.95233 | 8.076125 | 8.064961 | 7.479736 | 8.913156 | 8.993814 | 6.081949 | 7.118645 | 8.144139 | 5.458039 | 8.138707 | 7.245903 | 6.065283 |
| CP | 9.564785 | 7.144618 | 9.541647 | 7.674813 | 8.383134 | 7.040981 | 7.39286 | 5.671561 | 5.937076 | 6.358206 | 9.468017 | 5.92117 | 5.402161 |
| PSAT1 | 6.239543 | 5.721565 | 5.803871 | 6.937187 | 6.976999 | 5.794824 | 5.863892 | 5.679637 | 5.143161 | 5.401138 | 6.187064 | 6.187211 | 5.411431 |
| MECOM | 5.594639 | 5.444375 | 5.618391 | 5.162147 | 5.188838 | 5.387136 | 5.277192 | 5.602488 | 5.719709 | 4.79248 | 5.373886 | 5.523788 | 5.514967 |
| ESRP1 | 5.795043 | 6.589323 | 7.273785 | 6.941697 | 6.984171 | 6.492567 | 6.760689 | 6.185436 | 6.689099 | 5.535685 | 6.9733 | 6.592622 | 6.124424 |
| WFDC2 | 11.883093 | 11.724169 | 12.447891 | 9.025201 | 12.040408 | 11.020466 | 10.909291 | 11.382519 | 12.120182 | 10.016196 | 10.661728 | 11.223129 | 11.51198 |
| CEP55 | 4.494407 | 5.770132 | 5.977277 | 6.174296 | 6.774031 | 5.277558 | 4.540276 | 4.947092 | 5.461246 | 4.575187 | 7.174688 | 5.90587 | 4.908479 |
| MUC1 | 7.326824 | 9.794928 | 9.510588 | 8.03052 | 8.391391 | 8.145484 | 8.495189 | 7.333678 | 8.107142 | 7.658936 | 9.200866 | 7.427989 | 7.738406 |
| MCM2 | 7.704323 | 7.651983 | 8.442822 | 7.778308 | 8.182075 | 7.113611 | 8.114593 | 7.610957 | 7.951518 | 6.56372 | 8.779121 | 8.320732 | 7.382769 |
| FAM83D | NA | NA | NA | NA | NA | NA | NA | NA | NA | NA | NA | NA | NA |
| ZWINT | 6.350066 | 7.77663 | 7.775932 | 7.475765 | 7.811689 | 8.060884 | 6.542315 | 6.914259 | 7.317251 | 5.529584 | 8.138896 | 7.266953 | 6.636955 |
| NEK2 | 5.456176 | 5.430209 | 5.394698 | 5.018697 | 5.523 | 5.342294 | 4.804096 | 5.194504 | 5.273434 | 4.115768 | 5.650581 | 4.859034 | 4.441628 |
| BUB1B | 5.590525 | 7.427704 | 6.448141 | 6.514755 | 7.232943 | 6.620827 | 6.155254 | 6.692674 | 6.540078 | 5.434856 | 8.066508 | 6.558015 | 6.503273 |
| DLGAP5 | 5.533274 | 4.984898 | 5.275434 | 5.39912 | 5.233878 | 4.792062 | 4.256305 | 4.510345 | 5.022235 | 4.048807 | 6.111772 | 4.526068 | 3.940127 |
| MELK | 5.830696 | 6.943 | 7.648271 | 7.275032 | 7.705998 | 8.151017 | 6.638586 | 6.679084 | 7.506489 | 5.130344 | 7.313286 | 7.225596 | 6.834168 |
| FZD10 | 4.725859 | 3.952002 | 4.541179 | 4.812684 | 3.866681 | 5.078885 | 5.051564 | 4.823882 | 7.29845 | 4.353993 | 4.566461 | 5.770794 | 5.992941 |
| LPAR3 | 5.787029 | 4.873762 | 5.2797 | 5.199589 | 4.654972 | 5.249431 | 4.685342 | 4.826069 | 4.819641 | 4.992499 | 4.807322 | 5.421377 | 4.510991 |
| ITLN1 | NA | NA | NA | NA | NA | NA | NA | NA | NA | NA | NA | NA | NA |
| LINC01105 | NA | NA | NA | NA | NA | NA | NA | NA | NA | NA | NA | NA | NA |
| ANXA8L1 | 6.783341 | 6.455679 | 6.109691 | 6.752049 | 7.215266 | 6.993151 | 6.689123 | 7.334237 | 6.785948 | 6.893147 | 6.47202 | 6.344805 | 6.574812 |
| DFNA5 | 4.76566 | 5.460523 | 4.806721 | 6.029392 | 5.894507 | 5.397647 | 5.487381 | 5.927893 | 5.957015 | 7.407423 | 5.165071 | 5.591698 | 5.995858 |
| PRG4 | 3.266426 | 3.515039 | 3.10246 | 3.174414 | 3.329132 | 3.661424 | 3.365214 | 3.096135 | 3.290922 | 3.210643 | 3.20238 | 3.149394 | 3.177289 |
| ABCA8 | 3.707909 | 4.168938 | 4.05632 | 5.994226 | 5.543889 | 4.772079 | 5.985869 | 5.010789 | 4.094533 | 7.048982 | 3.789183 | 5.490973 | 6.724155 |
| PROCR | 3.645797 | 3.26421 | 3.447593 | 4.190787 | 4.007047 | 3.439348 | 3.649719 | 3.910747 | 3.625638 | 5.355004 | 3.348217 | 3.769502 | 3.694652 |
| CHGB | 4.189529 | 4.198496 | 3.744482 | 3.85303 | 3.678097 | 4.168736 | 3.782666 | 4.281987 | 3.906395 | 4.163476 | 4.13088 | 3.940208 | 3.871635 |
| AOX1 | 4.763285 | 5.102334 | 5.071132 | 5.373179 | 5.412855 | 5.943905 | 5.231004 | 5.452936 | 4.931534 | 6.169993 | 4.949678 | 5.412943 | 5.120353 |
| CALB2 | 5.186707 | 5.374704 | 5.046051 | 7.235042 | 6.027682 | 5.416355 | 5.6008 | 5.996258 | 5.108782 | 4.944478 | 5.147938 | 5.258505 | 4.867982 |
| HAND2-AS1 | 4.182306 | 4.79466 | 4.391061 | 4.589658 | 4.440988 | 5.164098 | 4.930966 | 4.921408 | 4.607347 | 4.887599 | 4.602036 | 4.431979 | 5.39758 |
| BNC1 | 4.754631 | 5.030745 | 4.738442 | 4.852123 | 4.876628 | 5.509832 | 4.825128 | 5.0361 | 4.707769 | 4.524645 | 4.685138 | 4.434669 | 4.950983 |
| BCHE | 3.16462 | 3.405982 | 3.140775 | 4.836482 | 4.523623 | 3.563981 | 3.46779 | 3.387434 | 3.458913 | 6.891169 | 3.273063 | 4.026396 | 4.253984 |
| CLEC4M | 4.049307 | 4.700208 | 4.149748 | 4.20163 | 4.158186 | 4.762936 | 4.653119 | 4.415244 | 4.270087 | 4.182842 | 4.538668 | 4.144689 | 4.130739 |
| NPY1R | 3.053783 | 3.484507 | 3.141695 | 3.262516 | 3.667421 | 3.903259 | 3.450771 | 3.415874 | 3.07325 | 5.229133 | 3.205234 | 3.319888 | 3.211259 |
| TCEAL2 | 3.513301 | 3.554949 | 3.751547 | 4.19308 | 3.964386 | 4.588817 | 3.840354 | 4.902803 | 4.939603 | 6.088182 | 3.85321 | 4.890579 | 6.020611 |
| MNDA | 3.894142 | 3.999461 | 3.697426 | 5.153283 | 4.85571 | 3.894142 | 3.98679 | 3.935062 | 3.769683 | 4.367484 | 4.236001 | 4.673199 | 4.098265 |
| PDE8B | 5.21283 | 5.608173 | 5.170978 | 5.131163 | 5.140813 | 6.228043 | 5.414463 | 5.749708 | 5.392852 | 7.509072 | 5.488596 | 5.173615 | 5.774467 |
| REEP1 | 4.944561 | 5.189358 | 4.378205 | 4.639456 | 4.88516 | 5.736661 | 4.930246 | 5.05498 | 4.877536 | 6.050822 | 4.792748 | 4.99155 | 5.022663 |
| ADH1C | 4.291316 | 3.523694 | 3.404178 | 3.861694 | 3.946062 | 3.612588 | 4.125834 | 3.392622 | 3.47228 | 4.275771 | 3.510477 | 3.894097 | 3.581228 |
| SPOCK1 | 5.050943 | 5.707143 | 5.348565 | 6.408534 | 5.581905 | 6.042148 | 5.721148 | 5.745945 | 5.747274 | 6.525678 | 5.4086 | 8.0628 | 6.928117 |
| KDR | 4.20703 | 4.140627 | 4.265745 | 4.903918 | 4.568286 | 4.293678 | 4.517866 | 4.271978 | 4.273944 | 5.055344 | 4.166315 | 4.674041 | 4.769246 |
| GADL1 | NA | NA | NA | NA | NA | NA | NA | NA | NA | NA | NA | NA | NA |
| SFRP1 | 4.933176 | 4.844651 | 4.834109 | 5.631159 | 4.985653 | 5.375726 | 5.392948 | 6.702682 | 5.268127 | 8.078786 | 4.702501 | 5.373872 | 5.611004 |
| BAMBI | 5.806655 | 4.521513 | 5.054484 | 6.768772 | 4.622316 | 5.037819 | 5.254576 | 5.400877 | 7.566489 | 6.683178 | 4.637402 | 5.467551 | 5.324513 |
| LGALS2 | 3.881477 | 4.216895 | 3.889375 | 4.125688 | 3.906087 | 4.557662 | 4.494689 | 4.288299 | 4.045979 | 3.846336 | 3.895505 | 4.287256 | 4.197311 |
| DIRAS3 | 4.157165 | 4.308573 | 4.49791 | 4.570419 | 4.08639 | 5.004786 | 4.178699 | 5.052695 | 4.389271 | 4.091545 | 4.099063 | 4.48344 | 4.413122 |
| C21orf62 | 4.35171 | 4.506886 | 4.218423 | 4.296863 | 4.149041 | 4.974679 | 4.474627 | 4.859783 | 4.59181 | 4.232944 | 4.4192 | 3.962434 | 4.217921 |
| TCEAL7 | NA | NA | NA | NA | NA | NA | NA | NA | NA | NA | NA | NA | NA |
| OGN | 3.002911 | 3.301576 | 2.810772 | 3.704132 | 3.777766 | 3.401775 | 3.417453 | 3.582507 | 3.116338 | 5.886507 | 3.142442 | 3.302496 | 3.424189 |
| SYT4 | NA | NA | NA | NA | NA | NA | NA | NA | NA | NA | NA | NA | NA |
| LOC100506718 | 5.332446 | 4.765423 | 4.964351 | 6.330373 | 5.764011 | 5.076439 | 5.396526 | 5.603713 | 5.790226 | 6.048416 | 4.811663 | 5.774963 | 5.86634 |
| GPRASP1 | 4.46275 | 4.919498 | 4.591674 | 4.711528 | 4.863941 | 5.704614 | 4.880754 | 5.244905 | 4.85796 | 6.910903 | 4.471566 | 5.255003 | 6.43319 |
| NELL2 | 6.324754 | 5.456463 | 5.289001 | 5.412928 | 5.831515 | 5.735486 | 5.379593 | 5.674718 | 5.755277 | 6.952557 | 5.396685 | 5.869856 | 5.879211 |
| AADACL2 | NA | NA | NA | NA | NA | NA | NA | NA | NA | NA | NA | NA | NA |
| GHR | 3.826184 | 3.612906 | 3.775542 | 5.764398 | 5.704471 | 3.923443 | 6.954984 | 3.772246 | 3.54541 | 5.536001 | 3.478736 | 4.895819 | 5.07878 |
| ADH1B | 3.433223 | 3.847377 | 3.571734 | 6.46907 | 6.584956 | 4.01208 | 7.992088 | 3.910046 | 3.645077 | 7.052712 | 3.738053 | 6.258428 | 5.328555 |
| MGARP | NA | NA | NA | NA | NA | NA | NA | NA | NA | NA | NA | NA | NA |
| IGFBP6 | 6.294846 | 5.612993 | 6.17818 | 7.794838 | 6.603192 | 5.717375 | 6.455851 | 7.775496 | 8.125518 | 9.110291 | 5.647116 | 7.164903 | 9.20704 |
| GFPT2 | 5.604838 | 5.511617 | 6.004437 | 7.218101 | 6.06426 | 6.060968 | 6.970281 | 6.096045 | 5.070426 | 7.045998 | 5.466984 | 6.755402 | 6.780452 |
| OLFML1 | 4.762908 | 5.504412 | 5.095853 | 6.576888 | 6.233699 | 5.546316 | 5.529889 | 5.900983 | 5.245364 | 7.130671 | 5.214009 | 6.422246 | 5.837264 |
| NAP1L3 | 3.869298 | 4.11413 | 3.65298 | 4.25781 | 4.246745 | 3.592822 | 3.725776 | 3.955991 | 3.711764 | 5.57621 | 3.827776 | 4.245266 | 4.352484 |
| HBB | 9.251708 | 8.657952 | 10.203055 | 12.069481 | 10.256337 | 8.056343 | 10.808106 | 9.688353 | 6.0121 | 12.19461 | 7.681419 | 8.550245 | 8.448166 |
| DAPK1-IT1 | NA | NA | NA | NA | NA | NA | NA | NA | NA | NA | NA | NA | NA |
| ALDH1A1 | 4.135617 | 3.96506 | 3.505419 | 4.599741 | 4.592801 | 3.518142 | 4.020243 | 3.487629 | 3.606514 | 6.628257 | 3.296685 | 6.198565 | 4.67545 |
| LRRN4 | NA | NA | NA | NA | NA | NA | NA | NA | NA | NA | NA | NA | NA |
| HAS1 | 6.020407 | 5.003235 | 4.948145 | 6.578384 | 5.192868 | 5.04728 | 6.604927 | 6.322449 | 4.819002 | 7.913149 | 4.677531 | 5.000621 | 5.180721 |
| LXN | 5.456704 | 6.118614 | 6.419789 | 8.484848 | 7.330657 | 5.499152 | 7.155457 | 5.681615 | 4.882338 | 7.314418 | 5.871702 | 7.541137 | 6.585509 |
| CLDN15 | 7.975782 | 7.44136 | 7.465248 | 7.648496 | 7.49433 | 7.454361 | 8.031127 | 7.533183 | 7.909708 | 7.507722 | 7.30792 | 7.442834 | 7.652188 |
| PDGFD | 4.679858 | 5.323865 | 5.0971 | 6.854673 | 6.67692 | 6.203091 | 6.222904 | 6.008015 | 5.190372 | 6.468235 | 5.216234 | 7.344395 | 6.695871 |
| PRSS35 | NA | NA | NA | NA | NA | NA | NA | NA | NA | NA | NA | NA | NA |
| HBA2 | 8.995988 | 7.822707 | 10.488476 | 12.039104 | 9.485813 | 7.942309 | 11.024043 | 10.791688 | 6.277387 | 12.259825 | 7.460973 | 8.949337 | 9.505067 |
| WNT2B | 5.211823 | 4.830747 | 4.729242 | 4.682801 | 4.721605 | 5.251149 | 4.868644 | 4.904205 | 5.241354 | 4.786781 | 4.766231 | 4.556939 | 4.779243 |
| CHRDL1 | 4.550747 | 5.471494 | 5.212069 | 6.546234 | 5.929095 | 5.773856 | 7.524185 | 5.880189 | 4.847226 | 8.970079 | 5.022867 | 6.867521 | 6.478744 |
| LOC101930363 | 3.360478 | 3.85281 | 3.443546 | 3.473782 | 3.551945 | 3.999239 | 3.950803 | 3.673983 | 3.671525 | 4.756243 | 3.940288 | 3.386756 | 3.866116 |
| PAPSS2 | 4.814962 | 4.78665 | 4.565692 | 5.884786 | 5.492839 | 4.882793 | 5.285465 | 5.143343 | 4.909646 | 5.856061 | 4.615165 | 4.867689 | 4.609954 |
| FLNC | 7.121611 | 6.288671 | 5.992743 | 7.363795 | 6.201921 | 6.256276 | 6.662236 | 7.211303 | 6.510727 | 8.340803 | 6.043909 | 6.557932 | 6.976825 |
| PLPP1 | 5.634164 | 5.504811 | 5.790367 | 7.504813 | 6.327756 | 5.450837 | 7.11021 | 5.660297 | 5.210921 | 8.594538 | 5.390926 | 6.809872 | 6.58988 |
| AQP9 | 4.360787 | 6.21447 | 5.68918 | 6.719861 | 6.023168 | 6.656993 | 6.242416 | 6.827265 | 5.553009 | 5.596095 | 6.398816 | 5.661249 | 5.425873 |
| TMEM255A | 2.984998 | 3.116548 | 2.907921 | 2.915959 | 3.165221 | 3.223596 | 3.050946 | 3.007702 | 3.051315 | 3.3362 | 2.963038 | 3.08524 | 3.080734 |
| HOXC6 | 6.263278 | 7.225216 | 5.871771 | 6.643596 | 5.978611 | 6.125804 | 6.844172 | 6.698189 | 6.753597 | 8.828361 | 5.970567 | 6.180205 | 5.92117 |
| LOC101926921 | 5.267471 | 6.150743 | 5.904277 | 8.092932 | 7.308138 | 6.423429 | 7.423879 | 6.542816 | 6.095063 | 8.427767 | 6.451906 | 7.824515 | 7.008207 |
| PCOLCE2 | 3.324679 | 3.429224 | 3.285924 | 4.297972 | 3.775644 | 3.780365 | 4.237185 | 3.556266 | 3.266049 | 6.203242 | 3.24708 | 3.712689 | 3.576124 |
| RNASE4 | 4.16743 | 4.348084 | 4.340906 | 5.208497 | 5.003762 | 5.032677 | 5.399588 | 5.243176 | 4.342061 | 6.313733 | 4.311377 | 5.398156 | 5.365959 |
| TCF21 | 4.871629 | 3.793714 | 4.158247 | 4.58778 | 4.26445 | 3.980211 | 3.886009 | 5.68092 | 4.36537 | 4.786862 | 3.771918 | 4.59593 | 4.174968 |
| LOC101928635 | 4.619247 | 5.39571 | 4.984888 | 7.275026 | 6.047351 | 5.685751 | 5.917092 | 7.112761 | 5.27827 | 6.930694 | 5.440937 | 5.938402 | 6.274523 |
| PKD2 | 4.057897 | 3.924559 | 3.972887 | 5.562078 | 4.935297 | 4.073491 | 4.300005 | 3.923 | 3.765278 | 7.592814 | 3.560233 | 5.720881 | 5.235298 |
| WNT5A | 4.61888 | 4.013674 | 4.535037 | 5.521736 | 4.372136 | 4.482796 | 4.372395 | 4.646182 | 4.936553 | 4.560318 | 4.105762 | 4.565618 | 4.393648 |
| FGF13 | 4.362445 | 4.398437 | 4.001143 | 4.537181 | 4.486284 | 4.973023 | 4.599082 | 4.40837 | 4.532034 | 4.644862 | 4.307437 | 4.50011 | 5.183579 |
| LHX2 | 3.968092 | 3.961621 | 3.780963 | 3.736799 | 3.659352 | 4.340306 | 3.919393 | 3.929971 | 3.895278 | 3.758407 | 3.903766 | 3.79616 | 3.656856 |
| ATP10D | 4.597455 | 4.198901 | 4.494081 | 5.238132 | 5.261692 | 4.628349 | 4.537775 | 4.349944 | 4.168933 | 5.307641 | 3.673712 | 5.057147 | 4.661199 |
| ARHGAP18 | NA | NA | NA | NA | NA | NA | NA | NA | NA | NA | NA | NA | NA |
| LOC286191 | NA | NA | NA | NA | NA | NA | NA | NA | NA | NA | NA | NA | NA |
| EFEMP1 | 4.189539 | 4.749382 | 4.627763 | 7.85583 | 6.853954 | 5.467985 | 6.527048 | 5.454621 | 4.301864 | 8.524937 | 4.354586 | 6.492648 | 6.137499 |
| LOC100996760 | NA | NA | NA | NA | NA | NA | NA | NA | NA | NA | NA | NA | NA |

| **Gene** | **GSM657574** | **GSM657575** | **GSM657576** | **GSM657577** | **GSM657578** | **GSM657579** | **GSM657580** | **GSM657581** | **GSM657582** | **GSM657583** | **GSM657584** | **GSM657585** | **GSM657586** |
| --- | --- | --- | --- | --- | --- | --- | --- | --- | --- | --- | --- | --- | --- |
| CD24 | 8.774217 | 6.922513 | 8.001885 | 9.12717 | 8.996357 | 8.510843 | 8.415719 | 8.253717 | 9.290712 | 7.783649 | 9.166031 | 5.584278 | 10.180966 |
| CLDN3 | 6.929636 | 6.266022 | 8.228016 | 9.255712 | 7.257856 | 9.082281 | 6.749695 | 8.479956 | 6.672091 | 7.418527 | 9.40214 | 5.712872 | 7.629953 |
| C1orf106 | 8.090357 | 7.381556 | 7.927064 | 7.790288 | 8.129089 | 8.6115 | 8.126387 | 8.948378 | 8.148878 | 7.561281 | 9.17284 | 6.934233 | 9.055045 |
| CRABP2 | 9.239669 | 6.846297 | 9.62222 | 8.614272 | 8.712032 | 9.045432 | 7.172336 | 9.76619 | 6.585221 | 10.76174 | 8.923889 | 7.880534 | 9.714422 |
| SOX17 | 8.243057 | 6.973011 | 6.924095 | 7.594068 | 7.607543 | 8.658711 | 7.029697 | 7.519936 | 6.799753 | 7.289922 | 9.645441 | 5.334692 | 6.968127 |
| ELF3 | 6.848179 | 6.956806 | 7.263227 | 6.23208 | 6.89477 | 6.742878 | 6.883888 | 8.171768 | 6.888975 | 7.042402 | 6.12661 | 6.338082 | 7.689295 |
| EPCAM | 8.976855 | 7.306253 | 9.326336 | 8.530307 | 8.458543 | 8.621391 | 9.149309 | 10.64238 | 7.81296 | 8.834703 | 9.787938 | 4.993566 | 8.927398 |
| SCGB2A1 | 3.693171 | 6.235511 | 7.17388 | 8.159071 | 7.04226 | 8.346038 | 9.152719 | 7.107465 | 7.320705 | 6.286802 | 7.272401 | 4.12481 | 7.309509 |
| KLK6 | 7.910307 | 6.654985 | 7.12079 | 6.749637 | 6.790967 | 7.664219 | 6.480675 | 8.831383 | 7.670789 | 9.822064 | 8.158594 | 6.428099 | 8.442245 |
| MMP7 | 5.432873 | 6.989486 | 8.41597 | 9.38566 | 8.064257 | 5.578648 | 9.413456 | 10.459987 | 10.514548 | 5.931017 | 9.417905 | 6.403269 | 7.525181 |
| CLDN4 | 6.98973 | 4.901074 | 6.22402 | 6.156695 | 5.272732 | 6.671957 | 5.707724 | 6.776607 | 6.037662 | 5.323233 | 7.029565 | 5.471753 | 7.473783 |
| CKS2 | 8.697786 | 5.050465 | 8.31803 | 6.846664 | 7.239534 | 8.225849 | 7.643423 | 6.817266 | 6.756197 | 8.038417 | 8.102398 | 5.225379 | 7.256596 |
| CP | 6.154146 | 5.550473 | 6.363286 | 8.72117 | 7.14005 | 6.559081 | 7.568239 | 8.290628 | 8.593199 | 5.967848 | 7.723708 | 6.349303 | 7.599833 |
| PSAT1 | 6.033737 | 5.058575 | 5.911992 | 5.729821 | 6.70159 | 6.035563 | 5.536189 | 5.669309 | 5.307878 | 5.686797 | 6.636418 | 6.006681 | 5.285559 |
| MECOM | 5.868822 | 4.881003 | 5.215293 | 5.374085 | 5.172518 | 5.623743 | 5.260819 | 5.626307 | 5.19065 | 5.150054 | 4.197184 | 4.984967 | 5.619303 |
| ESRP1 | 6.842888 | 5.806891 | 6.407623 | 6.373756 | 6.89526 | 7.170578 | 6.046495 | 7.828941 | 4.951629 | 7.151712 | 7.679071 | 6.325946 | 6.856129 |
| WFDC2 | 9.668197 | 9.294049 | 9.659511 | 11.807509 | 9.59549 | 11.667953 | 11.034611 | 9.413751 | 10.936352 | 10.560165 | 7.918055 | 7.803334 | 10.95462 |
| CEP55 | 5.004711 | 4.556588 | 5.599661 | 5.185573 | 5.473371 | 5.348372 | 4.909561 | 6.476915 | 4.389314 | 6.534054 | 7.170302 | 4.566535 | 5.371687 |
| MUC1 | 8.941406 | 7.421257 | 7.283148 | 9.653642 | 7.924592 | 8.633153 | 8.785742 | 7.815108 | 8.69475 | 8.919941 | 7.865613 | 6.456769 | 8.997426 |
| MCM2 | 8.842856 | 6.257217 | 7.711374 | 7.241148 | 7.381786 | 7.914355 | 6.695151 | 8.176177 | 6.503099 | 7.626424 | 8.469926 | 7.359947 | 7.333243 |
| FAM83D | NA | NA | NA | NA | NA | NA | NA | NA | NA | NA | NA | NA | NA |
| ZWINT | 7.719077 | 6.562247 | 8.354222 | 7.452519 | 6.860957 | 7.720084 | 6.924338 | 7.948248 | 6.027955 | 7.994733 | 7.985518 | 6.09266 | 6.998212 |
| NEK2 | 5.254132 | 4.351285 | 5.397104 | 4.637293 | 4.671562 | 5.178674 | 5.029232 | 4.856347 | 4.510334 | 5.31444 | 5.826971 | 5.274478 | 5.282162 |
| BUB1B | 6.94608 | 5.770699 | 7.329423 | 6.014964 | 6.425524 | 6.854739 | 6.450371 | 6.27582 | 5.259372 | 7.046051 | 7.230804 | 6.235553 | 6.980651 |
| DLGAP5 | 5.371493 | 3.922122 | 4.874021 | 5.084602 | 5.082315 | 5.500444 | 4.673501 | 5.674673 | 5.004612 | 6.446689 | 6.385128 | 4.647661 | 5.227678 |
| MELK | 6.952026 | 6.02993 | 7.177487 | 6.800795 | 6.643245 | 6.975913 | 6.796313 | 6.844596 | 5.942563 | 7.635816 | 7.901391 | 5.773888 | 7.06398 |
| FZD10 | 4.255546 | 5.068787 | 7.687947 | 4.338807 | 4.742951 | 5.838061 | 5.961402 | 6.702829 | 4.974055 | 4.306641 | 6.369082 | 4.664834 | 3.814295 |
| LPAR3 | 5.014414 | 4.34681 | 5.380279 | 4.661532 | 4.902133 | 5.709739 | 4.666128 | 4.993967 | 5.141236 | 4.970738 | 6.494243 | 5.465172 | 4.722713 |
| ITLN1 | NA | NA | NA | NA | NA | NA | NA | NA | NA | NA | NA | NA | NA |
| LINC01105 | NA | NA | NA | NA | NA | NA | NA | NA | NA | NA | NA | NA | NA |
| ANXA8L1 | 6.421144 | 6.98064 | 6.96701 | 6.301985 | 6.502893 | 6.53307 | 6.557419 | 7.46068 | 7.703644 | 7.065826 | 6.208322 | 7.557186 | 6.416537 |
| DFNA5 | 6.063591 | 6.495411 | 5.665549 | 6.6644 | 6.242598 | 5.878964 | 5.777289 | 5.114006 | 6.326536 | 5.193546 | 5.26759 | 5.994568 | 5.400739 |
| PRG4 | 3.240934 | 3.228415 | 3.594134 | 3.191916 | 3.357371 | 3.428099 | 3.669772 | 3.286145 | 3.48296 | 3.20122 | 3.125267 | 4.181606 | 3.39066 |
| ABCA8 | 3.970737 | 7.324544 | 4.923008 | 6.353925 | 7.263264 | 7.032138 | 4.936127 | 3.702716 | 6.637793 | 4.336326 | 3.776619 | 5.627316 | 4.917637 |
| PROCR | 3.269124 | 4.106509 | 3.480171 | 5.090513 | 4.157629 | 3.705293 | 3.492382 | 3.715114 | 3.520843 | 3.843577 | 3.014755 | 3.570863 | 3.904851 |
| CHGB | 4.03126 | 5.523162 | 4.061279 | 4.096412 | 3.798714 | 5.040174 | 4.345268 | 4.03337 | 4.162906 | 3.903737 | 3.566581 | 4.260156 | 4.160759 |
| AOX1 | 5.132084 | 6.412929 | 5.589901 | 6.04764 | 6.297269 | 5.787047 | 5.458767 | 4.974394 | 6.39489 | 5.04616 | 4.667636 | 6.456866 | 5.130158 |
| CALB2 | 4.734982 | 6.10255 | 5.692836 | 5.50082 | 5.532607 | 5.874375 | 4.902688 | 4.791289 | 5.232545 | 6.059491 | 4.449862 | 5.216821 | 6.332334 |
| HAND2-AS1 | 4.397642 | 4.741485 | 4.998804 | 4.491725 | 4.375391 | 4.436368 | 4.411381 | 4.567585 | 3.881235 | 4.316446 | 4.390826 | 5.685261 | 4.471292 |
| BNC1 | 4.681199 | 4.789901 | 5.075162 | 4.570283 | 4.649393 | 4.930104 | 4.743518 | 4.758077 | 5.14079 | 5.11822 | 4.658324 | 5.531564 | 4.917103 |
| BCHE | 3.902755 | 3.23253 | 3.587581 | 5.888047 | 7.366286 | 3.451667 | 3.27736 | 3.257328 | 3.597105 | 3.741488 | 3.243129 | 3.724622 | 3.922775 |
| CLEC4M | 4.44205 | 4.460874 | 5.029683 | 4.301924 | 4.053386 | 4.476716 | 4.445192 | 4.424479 | 4.340327 | 4.396102 | 4.203701 | 5.452589 | 4.137113 |
| NPY1R | 3.479836 | 3.213544 | 3.516124 | 3.990506 | 5.450256 | 3.5687 | 3.785005 | 3.418333 | 3.129981 | 3.099385 | 3.275088 | 3.879125 | 3.374819 |
| TCEAL2 | 4.79606 | 5.976473 | 4.215436 | 5.453335 | 5.446471 | 7.216829 | 3.965898 | 3.702716 | 4.416605 | 4.133888 | 3.605346 | 4.926893 | 4.521947 |
| MNDA | 3.747433 | 3.676974 | 3.447092 | 3.925969 | 4.185487 | 3.901083 | 4.061582 | 3.631532 | 5.44254 | 4.495111 | 3.469463 | 3.932899 | 3.881909 |
| PDE8B | 5.920246 | 5.313054 | 6.01732 | 6.392667 | 5.994371 | 5.304188 | 5.518655 | 5.386166 | 5.060858 | 5.149642 | 5.117048 | 6.068287 | 5.359406 |
| REEP1 | 5.24246 | 4.592774 | 5.442342 | 5.608812 | 5.734553 | 4.921412 | 5.111254 | 4.908957 | 5.208409 | 4.53101 | 4.47432 | 5.952107 | 4.801292 |
| ADH1C | 3.579234 | 3.54164 | 3.533125 | 4.023851 | 3.648378 | 3.717346 | 3.596974 | 3.285911 | 4.007014 | 3.545598 | 3.38773 | 3.553032 | 3.393562 |
| SPOCK1 | 5.880713 | 5.2817 | 5.955256 | 6.623673 | 6.431469 | 5.470942 | 5.39715 | 5.254152 | 4.861981 | 5.886112 | 4.557265 | 6.156088 | 5.581665 |
| KDR | 4.173594 | 4.089337 | 4.191982 | 5.154475 | 5.189886 | 4.433709 | 4.326748 | 4.098535 | 4.163728 | 4.525173 | 3.978869 | 4.191962 | 4.327241 |
| GADL1 | NA | NA | NA | NA | NA | NA | NA | NA | NA | NA | NA | NA | NA |
| SFRP1 | 4.805146 | 5.137064 | 4.904384 | 6.261863 | 6.094377 | 5.653259 | 4.729637 | 6.12418 | 5.256949 | 5.019777 | 4.5497 | 5.397754 | 4.970704 |
| BAMBI | 4.451857 | 8.498906 | 5.375868 | 5.353774 | 5.352992 | 7.599792 | 5.135124 | 5.212175 | 5.556079 | 4.79553 | 5.461618 | 6.235574 | 4.833812 |
| LGALS2 | 4.140845 | 4.083706 | 4.32838 | 4.130044 | 3.863914 | 3.70111 | 4.072542 | 3.940154 | 4.242127 | 4.499676 | 3.734785 | 4.784863 | 5.123274 |
| DIRAS3 | 4.891678 | 7.176502 | 4.335873 | 4.060842 | 5.296344 | 7.352831 | 4.463653 | 4.5161 | 5.075156 | 3.906427 | 4.06711 | 5.107338 | 3.769379 |
| C21orf62 | 4.484342 | 5.165985 | 5.109235 | 4.350041 | 4.266142 | 4.66458 | 4.448815 | 4.478533 | 4.47506 | 4.144527 | 4.244798 | 5.378191 | 4.421916 |
| TCEAL7 | NA | NA | NA | NA | NA | NA | NA | NA | NA | NA | NA | NA | NA |
| OGN | 3.223012 | 4.540208 | 3.387886 | 3.298269 | 4.547388 | 4.217813 | 3.171974 | 3.650703 | 3.461717 | 3.19474 | 3.026633 | 3.677978 | 3.271775 |
| SYT4 | NA | NA | NA | NA | NA | NA | NA | NA | NA | NA | NA | NA | NA |
| LOC100506718 | 4.766796 | 7.033142 | 5.329477 | 5.744674 | 6.592564 | 6.222526 | 5.127681 | 5.192216 | 5.998598 | 5.507657 | 5.035138 | 5.711919 | 5.479198 |
| GPRASP1 | 4.735924 | 7.476935 | 5.49196 | 6.179761 | 6.540889 | 6.997909 | 5.684487 | 5.386471 | 6.570565 | 4.727192 | 4.669081 | 6.395366 | 5.127014 |
| NELL2 | 6.869298 | 5.642533 | 5.859903 | 5.898336 | 5.649982 | 5.524445 | 5.659413 | 6.026141 | 5.857287 | 5.547822 | 5.288427 | 6.178158 | 5.58717 |
| AADACL2 | NA | NA | NA | NA | NA | NA | NA | NA | NA | NA | NA | NA | NA |
| GHR | 4.092988 | 4.953792 | 4.216686 | 4.70844 | 5.073727 | 4.431713 | 4.16482 | 3.424815 | 6.404175 | 4.037005 | 3.456165 | 4.180779 | 4.094709 |
| ADH1B | 3.758448 | 4.197759 | 4.121463 | 6.714787 | 6.096612 | 3.792303 | 3.768527 | 3.786529 | 3.500113 | 4.627285 | 3.545609 | 4.583504 | 4.399303 |
| MGARP | NA | NA | NA | NA | NA | NA | NA | NA | NA | NA | NA | NA | NA |
| IGFBP6 | 6.295057 | 8.620586 | 5.40424 | 9.227809 | 8.875825 | 8.104657 | 7.082556 | 5.868686 | 6.689699 | 8.048757 | 5.294192 | 6.723476 | 6.369023 |
| GFPT2 | 5.940509 | 6.203745 | 6.206952 | 6.358384 | 6.390195 | 6.143743 | 5.363066 | 5.903441 | 5.415311 | 6.255996 | 5.55037 | 7.113077 | 5.59748 |
| OLFML1 | 5.035696 | 6.753005 | 5.599122 | 5.683149 | 6.532698 | 6.675236 | 5.27306 | 5.239213 | 5.096711 | 5.649503 | 4.871749 | 5.787418 | 5.451012 |
| NAP1L3 | 3.778091 | 5.143043 | 3.95333 | 4.223717 | 4.582152 | 5.85941 | 4.374629 | 4.388829 | 3.953499 | 3.76633 | 3.683576 | 3.700611 | 3.516927 |
| HBB | 6.918286 | 6.273116 | 6.869539 | 10.375891 | 10.317785 | 7.417273 | 6.251116 | 6.269476 | 7.221544 | 6.855913 | 6.084277 | 7.274968 | 8.360536 |
| DAPK1-IT1 | NA | NA | NA | NA | NA | NA | NA | NA | NA | NA | NA | NA | NA |
| ALDH1A1 | 4.268608 | 6.585797 | 3.764541 | 5.361621 | 5.632745 | 6.268831 | 3.881261 | 3.929471 | 5.054091 | 3.675794 | 3.256773 | 4.265008 | 3.432698 |
| LRRN4 | NA | NA | NA | NA | NA | NA | NA | NA | NA | NA | NA | NA | NA |
| HAS1 | 5.020503 | 4.88747 | 4.966539 | 5.029786 | 5.470076 | 6.442279 | 4.906431 | 4.60232 | 4.92276 | 4.971351 | 4.648495 | 6.046019 | 5.051577 |
| LXN | 6.014518 | 7.750234 | 5.196153 | 6.438201 | 6.859365 | 7.0849 | 6.228359 | 5.244818 | 7.500962 | 6.891529 | 5.400826 | 4.747391 | 6.143286 |
| CLDN15 | 7.316347 | 7.714945 | 7.335456 | 7.482405 | 7.477952 | 7.671171 | 7.266037 | 7.291476 | 7.216291 | 7.440106 | 7.483474 | 7.339342 | 7.520909 |
| PDGFD | 5.644181 | 7.932179 | 6.205407 | 6.523643 | 5.972821 | 7.218508 | 6.616564 | 5.837957 | 5.919568 | 6.517824 | 4.949223 | 6.169092 | 5.80307 |
| PRSS35 | NA | NA | NA | NA | NA | NA | NA | NA | NA | NA | NA | NA | NA |
| HBA2 | 6.648733 | 6.702381 | 6.812071 | 10.597656 | 10.921817 | 7.476902 | 6.320431 | 6.402233 | 6.635761 | 7.703536 | 6.570995 | 7.115594 | 9.22986 |
| WNT2B | 4.902562 | 5.00066 | 5.20741 | 4.808339 | 4.664545 | 5.150439 | 5.086766 | 4.879549 | 5.033923 | 4.693223 | 4.764199 | 5.358679 | 4.927812 |
| CHRDL1 | 4.923507 | 4.818148 | 5.268948 | 7.829552 | 8.878535 | 5.214394 | 6.378997 | 4.75562 | 7.371848 | 5.49734 | 4.473986 | 5.511616 | 5.767859 |
| LOC101930363 | 3.543293 | 6.497052 | 4.002361 | 3.773334 | 3.768774 | 4.751109 | 6.494951 | 3.897531 | 7.247869 | 3.570448 | 3.58514 | 5.440034 | 3.729311 |
| PAPSS2 | 4.845207 | 5.177862 | 5.015995 | 4.96434 | 5.466074 | 5.435849 | 4.964923 | 5.329271 | 5.309038 | 5.301597 | 4.521285 | 5.049376 | 4.889428 |
| FLNC | 6.188005 | 6.00934 | 6.456787 | 7.881693 | 7.516233 | 6.091497 | 5.779735 | 5.885837 | 5.885202 | 6.574835 | 6.471941 | 6.611055 | 6.994154 |
| PLPP1 | 5.352092 | 5.925057 | 5.302489 | 7.40337 | 7.860728 | 5.815165 | 5.642463 | 5.420274 | 5.87219 | 6.210456 | 4.696283 | 5.705982 | 5.812194 |
| AQP9 | 6.203483 | 5.371402 | 6.741835 | 5.287717 | 5.602082 | 5.751323 | 6.302534 | 5.645292 | 6.074881 | 5.577961 | 5.811351 | 7.285181 | 5.51669 |
| TMEM255A | 3.013845 | 5.012944 | 3.746179 | 3.218196 | 3.572434 | 3.933858 | 3.767329 | 2.962099 | 3.264173 | 2.985693 | 2.831118 | 3.393289 | 3.072126 |
| HOXC6 | 7.865631 | 8.296197 | 6.332538 | 7.979527 | 8.46988 | 8.122332 | 5.988634 | 8.415046 | 6.019029 | 6.338817 | 6.880934 | 7.097625 | 6.236125 |
| LOC101926921 | 5.972712 | 7.104827 | 6.169824 | 7.249727 | 8.015088 | 6.547384 | 6.228666 | 5.878641 | 6.511962 | 7.029567 | 5.654875 | 6.849164 | 6.10157 |
| PCOLCE2 | 3.712821 | 3.24741 | 3.456213 | 3.835655 | 3.85925 | 3.230986 | 3.541621 | 3.167177 | 3.083752 | 3.649285 | 3.14155 | 3.860634 | 3.345228 |
| RNASE4 | 4.084275 | 6.62261 | 4.733728 | 6.419232 | 6.513912 | 6.756729 | 5.10068 | 4.463922 | 5.904444 | 4.232308 | 3.902708 | 5.276832 | 4.467758 |
| TCF21 | 3.693171 | 6.65971 | 4.070729 | 4.23104 | 4.953618 | 6.919975 | 3.891898 | 4.754304 | 4.626455 | 3.97475 | 4.144979 | 5.21986 | 3.934787 |
| LOC101928635 | 5.396495 | 5.781858 | 5.637154 | 5.990835 | 5.895779 | 5.673531 | 5.686053 | 5.320084 | 5.862107 | 5.612333 | 5.438837 | 6.449528 | 5.7303 |
| PKD2 | 3.691237 | 5.915396 | 3.629789 | 6.485638 | 5.390587 | 4.871345 | 4.507521 | 4.430206 | 4.420016 | 4.25056 | 3.816495 | 4.292736 | 3.94761 |
| WNT5A | 5.495055 | 5.724773 | 4.803591 | 5.370555 | 4.596966 | 6.372508 | 5.566991 | 4.808122 | 5.970772 | 4.119665 | 4.992509 | 4.087458 | 4.513455 |
| FGF13 | 4.595885 | 4.427998 | 4.519707 | 4.497624 | 5.441657 | 4.532869 | 4.549905 | 4.190235 | 4.330007 | 4.535347 | 3.984787 | 4.932284 | 4.3599 |
| LHX2 | 4.607158 | 3.815236 | 4.245849 | 3.820369 | 3.719702 | 3.80917 | 3.801781 | 4.25723 | 3.913114 | 3.57387 | 4.57423 | 4.544932 | 3.86869 |
| ATP10D | 4.581001 | 5.126648 | 4.671453 | 4.753229 | 4.959594 | 5.103777 | 5.243932 | 4.279334 | 5.562649 | 4.43283 | 3.837054 | 4.6787 | 4.539054 |
| ARHGAP18 | NA | NA | NA | NA | NA | NA | NA | NA | NA | NA | NA | NA | NA |
| LOC286191 | NA | NA | NA | NA | NA | NA | NA | NA | NA | NA | NA | NA | NA |
| EFEMP1 | 5.729283 | 7.241226 | 4.581194 | 7.533043 | 8.114334 | 6.772353 | 5.24024 | 4.319425 | 8.505917 | 6.150787 | 3.591015 | 5.412189 | 5.935663 |
| LOC100996760 | NA | NA | NA | NA | NA | NA | NA | NA | NA | NA | NA | NA | NA |

| **Gene** | **GSM657587** | **GSM657588** | **GSM657589** | **GSM657590** | **GSM657591** | **GSM657592** | **GSM657593** | **GSM657594** | **GSM657595** | **GSM657596** | **GSM657597** | **GSM657598** | **GSM657599** |
| --- | --- | --- | --- | --- | --- | --- | --- | --- | --- | --- | --- | --- | --- |
| CD24 | 9.003937 | 10.135098 | 9.764874 | 8.897566 | 8.853762 | 9.164028 | 8.628558 | 9.258782 | 8.836237 | 4.783758 | 8.636963 | 8.652601 | 8.373469 |
| CLDN3 | 7.771738 | 9.446474 | 8.207089 | 5.078699 | 9.119729 | 9.163149 | 9.344503 | 8.292614 | 9.558424 | 4.700635 | 7.99762 | 6.853111 | 7.564255 |
| C1orf106 | 7.980545 | 7.25121 | 8.556046 | 6.765099 | 7.519752 | 7.781717 | 8.431645 | 8.23305 | 6.875483 | 5.71745 | 7.712624 | 7.305272 | 8.407558 |
| CRABP2 | 9.96655 | 8.74823 | 11.146637 | 7.093224 | 10.441046 | 9.891236 | 10.551579 | 6.846506 | 10.804728 | 6.47914 | 9.830046 | 10.472116 | 8.025032 |
| SOX17 | 7.841199 | 8.088861 | 7.353951 | 7.244243 | 7.740586 | 9.116525 | 8.769474 | 7.615721 | 8.31217 | 5.473141 | 7.360263 | 6.404108 | 7.351258 |
| ELF3 | 8.456786 | 7.940062 | 8.083813 | 5.242795 | 7.421087 | 8.174878 | 7.83624 | 7.879409 | 5.94135 | 4.929881 | 6.663511 | 6.51272 | 7.034539 |
| EPCAM | 9.768765 | 9.562847 | 9.581059 | 4.603962 | 9.418804 | 9.796288 | 8.940917 | 8.655934 | 9.346398 | 4.211972 | 7.805474 | 8.373891 | 10.052625 |
| SCGB2A1 | 8.434397 | 6.51405 | 9.876916 | 3.327431 | 11.026045 | 10.95099 | 9.204123 | 11.473277 | 6.559275 | 3.394279 | 5.672979 | 4.589393 | 5.096929 |
| KLK6 | 8.702856 | 8.075686 | 8.838385 | 5.412097 | 8.395653 | 8.951614 | 8.041692 | 8.453624 | 7.822515 | 5.27701 | 7.732369 | 6.622396 | 4.915303 |
| MMP7 | 7.549266 | 6.494548 | 9.425918 | 5.290002 | 7.817622 | 7.863837 | 8.103372 | 9.270599 | 6.419567 | 4.751122 | 11.426665 | 7.316521 | 6.483808 |
| CLDN4 | 5.923727 | 7.383005 | 6.637048 | 4.225228 | 6.972514 | 7.349292 | 6.706641 | 7.303605 | 7.616705 | 3.989871 | 6.301169 | 5.540523 | 5.582391 |
| CKS2 | 8.746435 | 8.464911 | 9.693438 | 7.049843 | 9.228899 | 9.310256 | 8.080956 | 9.091283 | 9.897974 | 6.113625 | 10.476157 | 9.439589 | 8.173573 |
| CP | 8.278032 | 8.524146 | 7.34485 | 7.191198 | 7.795975 | 7.929137 | 8.211071 | 7.745593 | 6.831864 | 4.763118 | 8.00281 | 7.333509 | 7.7104 |
| PSAT1 | 5.393567 | 6.110157 | 6.83976 | 5.33674 | 6.809277 | 6.705028 | 5.928611 | 6.057444 | 8.337277 | 4.958886 | 7.174916 | 5.741959 | 5.280533 |
| MECOM | 5.541706 | 5.728947 | 5.447725 | 4.137262 | 5.320266 | 5.638698 | 5.599525 | 5.194529 | 5.513322 | 4.459972 | 5.526574 | 5.270758 | 5.535437 |
| ESRP1 | 7.391603 | 7.625369 | 7.737732 | 6.473121 | 7.941679 | 8.5546 | 7.530635 | 6.754301 | 6.935769 | 5.551576 | 6.54424 | 6.486854 | 6.671888 |
| WFDC2 | 11.022127 | 11.253326 | 10.888228 | 10.895899 | 10.687342 | 10.917677 | 11.242634 | 11.360559 | 10.895265 | 6.396028 | 11.042252 | 11.178698 | 11.053811 |
| CEP55 | 6.395705 | 6.530989 | 7.093744 | 4.46198 | 7.278443 | 8.117406 | 6.919449 | 6.958938 | 6.709239 | 4.05245 | 5.050505 | 4.892715 | 5.614347 |
| MUC1 | 8.954835 | 8.919513 | 8.163304 | 7.367729 | 9.205562 | 10.692297 | 9.269766 | 8.60106 | 7.308961 | 5.216945 | 8.360752 | 6.550496 | 8.513591 |
| MCM2 | 7.390886 | 8.117406 | 7.758928 | 6.530481 | 7.614488 | 8.444532 | 8.547906 | 7.386353 | 7.75672 | 6.001006 | 7.358559 | 7.740995 | 7.430126 |
| FAM83D | NA | NA | NA | NA | NA | NA | NA | NA | NA | NA | NA | NA | NA |
| ZWINT | 7.568246 | 7.986807 | 8.317411 | 5.988371 | 8.317569 | 8.300447 | 8.346146 | 7.961302 | 8.030175 | 5.19743 | 7.741395 | 7.41563 | 7.988935 |
| NEK2 | 5.299845 | 5.311317 | 5.927768 | 4.360485 | 5.605702 | 5.352725 | 6.137894 | 5.121207 | 5.679784 | 4.150043 | 5.743771 | 5.309214 | 5.239252 |
| BUB1B | 6.459506 | 7.363391 | 7.913361 | 5.731364 | 7.629363 | 7.62978 | 7.780449 | 7.431454 | 7.2698 | 5.430888 | 7.728243 | 6.661901 | 6.959033 |
| DLGAP5 | 6.064339 | 5.159121 | 5.817823 | 4.345447 | 6.040348 | 7.380398 | 6.559324 | 6.206351 | 6.081213 | 3.645379 | 6.531579 | 4.865971 | 5.485734 |
| MELK | 7.669391 | 6.928172 | 7.98648 | 5.979415 | 8.360861 | 8.680111 | 7.463708 | 7.655095 | 7.911692 | 5.144831 | 8.233897 | 6.587212 | 7.258224 |
| FZD10 | 3.974807 | 6.159244 | 4.694371 | 3.830261 | 4.521491 | 6.569631 | 6.095009 | 4.737259 | 6.653504 | 3.740125 | 4.606083 | 5.282442 | 5.828231 |
| LPAR3 | 5.15284 | 5.758059 | 5.739695 | 4.674263 | 5.932976 | 6.914782 | 5.653645 | 5.070179 | 4.835367 | 4.65735 | 4.846837 | 5.294837 | 4.65472 |
| ITLN1 | NA | NA | NA | NA | NA | NA | NA | NA | NA | NA | NA | NA | NA |
| LINC01105 | NA | NA | NA | NA | NA | NA | NA | NA | NA | NA | NA | NA | NA |
| ANXA8L1 | 7.284397 | 6.456658 | 6.635941 | 10.3196 | 7.083947 | 5.970438 | 6.49868 | 7.472594 | 6.411303 | 6.935265 | 6.559175 | 7.16018 | 6.563272 |
| DFNA5 | 5.610421 | 5.425485 | 5.409837 | 7.715312 | 5.877616 | 5.408116 | 6.272696 | 5.679503 | 5.569746 | 7.431867 | 5.675942 | 5.695564 | 5.569098 |
| PRG4 | 3.412385 | 3.226428 | 3.876765 | 6.257455 | 3.21751 | 3.101388 | 3.175924 | 3.206859 | 3.333802 | 3.064265 | 3.39943 | 3.3544 | 3.292276 |
| ABCA8 | 4.173246 | 3.797743 | 4.734643 | 4.237245 | 4.15935 | 3.647129 | 4.017278 | 5.184119 | 4.537555 | 8.287333 | 4.032121 | 4.288182 | 4.559414 |
| PROCR | 3.521498 | 3.704747 | 3.957796 | 6.511371 | 3.464298 | 3.336092 | 3.469693 | 3.760983 | 3.414013 | 4.24978 | 3.33254 | 3.949976 | 3.202684 |
| CHGB | 3.781963 | 3.833812 | 3.842275 | 3.856175 | 3.640949 | 3.838323 | 3.780238 | 4.071099 | 3.719387 | 4.036354 | 4.255776 | 4.235276 | 4.207851 |
| AOX1 | 6.14628 | 5.067065 | 5.139395 | 6.449961 | 4.820044 | 4.771452 | 4.618335 | 5.213661 | 4.524184 | 6.881843 | 5.431637 | 5.307215 | 4.978241 |
| CALB2 | 6.371675 | 4.559137 | 4.965064 | 8.734605 | 5.338192 | 4.741642 | 5.877666 | 4.892447 | 5.387808 | 5.707698 | 4.642362 | 4.929018 | 6.425321 |
| HAND2-AS1 | 4.373731 | 4.309535 | 4.530766 | 4.551448 | 4.230566 | 4.303829 | 4.415154 | 4.321913 | 4.418885 | 4.60348 | 5.13831 | 4.918499 | 4.684937 |
| BNC1 | 5.147834 | 4.651767 | 4.807307 | 5.681554 | 5.427022 | 4.712019 | 4.634829 | 4.667685 | 4.960927 | 4.722424 | 5.0058 | 4.814868 | 4.67218 |
| BCHE | 3.639837 | 3.350699 | 3.830221 | 5.966946 | 3.908576 | 3.062302 | 3.421073 | 3.263537 | 3.599905 | 3.243542 | 3.36505 | 3.677865 | 3.502367 |
| CLEC4M | 4.390834 | 4.410858 | 4.19585 | 4.588125 | 4.194672 | 4.240182 | 4.277067 | 4.295173 | 4.37482 | 4.419716 | 4.843768 | 5.180667 | 4.224523 |
| NPY1R | 3.357926 | 3.240677 | 3.467716 | 5.1785 | 3.329751 | 3.149059 | 2.918862 | 3.248896 | 3.048512 | 3.38783 | 3.496464 | 3.604483 | 3.293591 |
| TCEAL2 | 3.849373 | 3.440141 | 3.977399 | 6.473554 | 4.117431 | 3.509401 | 4.312224 | 4.553714 | 3.721107 | 6.286523 | 3.891362 | 4.097991 | 3.903334 |
| MNDA | 4.01711 | 4.913648 | 4.080907 | 4.658149 | 5.071658 | 3.687493 | 4.097566 | 3.520351 | 3.776261 | 3.952147 | 3.903645 | 3.750606 | 3.520814 |
| PDE8B | 5.581734 | 5.255617 | 5.419293 | 5.623941 | 5.029596 | 5.189733 | 5.213654 | 5.122878 | 5.019502 | 5.363563 | 5.232866 | 6.13384 | 5.163437 |
| REEP1 | 4.883747 | 4.792974 | 4.969944 | 5.60468 | 4.494661 | 4.484407 | 4.617599 | 4.640343 | 4.77288 | 4.885577 | 5.044777 | 5.446998 | 4.966019 |
| ADH1C | 3.427563 | 3.809908 | 3.731601 | 3.435856 | 3.525707 | 3.435498 | 3.545815 | 3.729992 | 3.637421 | 3.84305 | 3.690639 | 3.873374 | 3.34035 |
| SPOCK1 | 5.390216 | 5.048851 | 5.475402 | 7.043877 | 5.816354 | 4.993983 | 5.814533 | 5.194798 | 5.559629 | 5.401001 | 5.473223 | 5.521443 | 6.323617 |
| KDR | 4.38973 | 4.42472 | 4.225646 | 4.766716 | 4.341336 | 4.147641 | 4.244247 | 3.964589 | 4.247599 | 4.3155 | 3.883728 | 4.153016 | 4.223627 |
| GADL1 | NA | NA | NA | NA | NA | NA | NA | NA | NA | NA | NA | NA | NA |
| SFRP1 | 5.156495 | 4.561987 | 4.77701 | 5.292283 | 4.59598 | 4.478366 | 6.449087 | 6.423301 | 4.750674 | 10.023332 | 4.935094 | 4.850946 | 5.552003 |
| BAMBI | 5.12688 | 5.074082 | 4.894369 | 6.391264 | 4.771173 | 4.701088 | 4.621459 | 4.946 | 4.568174 | 6.705342 | 4.894237 | 5.397211 | 5.712673 |
| LGALS2 | 4.245087 | 4.354429 | 3.997857 | 7.041254 | 4.29245 | 4.04917 | 4.352358 | 4.334043 | 3.880514 | 4.111032 | 5.308529 | 4.794197 | 3.609579 |
| DIRAS3 | 4.223656 | 3.994724 | 4.856404 | 8.910117 | 4.249275 | 4.009399 | 4.047006 | 5.069656 | 4.244657 | 9.097363 | 4.202382 | 4.138417 | 4.452659 |
| C21orf62 | 4.641424 | 4.34563 | 4.468911 | 4.397687 | 4.128986 | 4.148468 | 4.218335 | 4.817071 | 4.138108 | 5.78776 | 4.606312 | 5.103286 | 4.484746 |
| TCEAL7 | NA | NA | NA | NA | NA | NA | NA | NA | NA | NA | NA | NA | NA |
| OGN | 2.999526 | 3.047182 | 3.228996 | 3.04895 | 2.919215 | 2.965529 | 2.911921 | 3.878574 | 2.971764 | 8.22961 | 3.185973 | 3.071787 | 3.340506 |
| SYT4 | NA | NA | NA | NA | NA | NA | NA | NA | NA | NA | NA | NA | NA |
| LOC100506718 | 5.555325 | 4.93321 | 5.150548 | 5.870761 | 5.006175 | 4.572431 | 5.141359 | 5.604649 | 5.070899 | 7.621743 | 4.707221 | 5.389324 | 5.6618 |
| GPRASP1 | 4.751813 | 4.583744 | 5.213348 | 5.614107 | 4.840446 | 4.580679 | 4.834209 | 5.238696 | 4.591099 | 7.152045 | 4.857306 | 5.283003 | 5.56456 |
| NELL2 | 5.943316 | 5.728459 | 6.191933 | 7.349486 | 5.870819 | 5.389981 | 5.518879 | 5.521029 | 5.402453 | 5.498779 | 5.821517 | 5.752894 | 5.843098 |
| AADACL2 | NA | NA | NA | NA | NA | NA | NA | NA | NA | NA | NA | NA | NA |
| GHR | 3.627831 | 3.539318 | 3.55655 | 6.513899 | 3.600977 | 3.228775 | 3.567121 | 3.582772 | 3.738809 | 5.052688 | 3.545292 | 4.460406 | 3.670854 |
| ADH1B | 3.949396 | 3.669158 | 3.644693 | 3.829246 | 3.644133 | 3.616217 | 3.591798 | 3.516193 | 5.079109 | 6.88112 | 3.84498 | 4.350332 | 3.706377 |
| MGARP | NA | NA | NA | NA | NA | NA | NA | NA | NA | NA | NA | NA | NA |
| IGFBP6 | 6.801613 | 6.372808 | 8.187044 | 8.777673 | 6.304597 | 5.513483 | 7.133279 | 6.443293 | 6.01194 | 6.828445 | 6.305599 | 5.681124 | 5.958169 |
| GFPT2 | 6.078132 | 5.770977 | 5.366598 | 6.675956 | 5.843375 | 5.428438 | 6.682849 | 5.192039 | 5.607738 | 6.559731 | 5.823197 | 6.28081 | 4.889899 |
| OLFML1 | 5.397012 | 5.147007 | 5.125035 | 5.293409 | 5.173612 | 5.042953 | 5.659263 | 5.292723 | 5.036621 | 8.332327 | 5.148153 | 5.154941 | 5.637281 |
| NAP1L3 | 3.683957 | 3.564271 | 3.92609 | 4.202633 | 3.850682 | 3.407228 | 3.789496 | 3.772924 | 3.914351 | 8.119373 | 3.468708 | 3.915123 | 4.256968 |
| HBB | 7.29175 | 6.245127 | 6.958457 | 11.5007 | 8.041402 | 6.343722 | 7.736807 | 7.248393 | 8.117473 | 11.527979 | 6.92337 | 7.051728 | 6.291187 |
| DAPK1-IT1 | NA | NA | NA | NA | NA | NA | NA | NA | NA | NA | NA | NA | NA |
| ALDH1A1 | 3.363276 | 3.981345 | 4.236317 | 5.840251 | 3.529709 | 3.330108 | 3.655232 | 4.225392 | 3.666624 | 8.20921 | 3.246654 | 3.394682 | 3.905638 |
| LRRN4 | NA | NA | NA | NA | NA | NA | NA | NA | NA | NA | NA | NA | NA |
| HAS1 | 4.934356 | 4.692788 | 5.022212 | 4.818877 | 4.761939 | 4.441426 | 5.043731 | 5.106637 | 4.510712 | 5.446848 | 4.681705 | 5.043305 | 4.793138 |
| LXN | 6.38416 | 5.796274 | 7.030607 | 10.031774 | 7.019992 | 4.992838 | 7.311539 | 6.13473 | 6.626149 | 6.071292 | 5.531922 | 5.0186 | 5.656946 |
| CLDN15 | 7.121542 | 6.850569 | 7.139643 | 8.299943 | 6.92639 | 6.983162 | 7.250029 | 7.335742 | 7.034122 | 7.269871 | 7.374755 | 7.353586 | 7.42125 |
| PDGFD | 5.767082 | 4.978138 | 5.763196 | 6.998369 | 5.615397 | 5.010459 | 6.2171 | 5.512319 | 6.427323 | 9.371058 | 5.543796 | 5.86426 | 5.427949 |
| PRSS35 | NA | NA | NA | NA | NA | NA | NA | NA | NA | NA | NA | NA | NA |
| HBA2 | 8.113654 | 6.257616 | 6.514593 | 11.064358 | 8.010656 | 6.592827 | 7.746011 | 7.016292 | 7.919981 | 11.474942 | 6.612388 | 6.267127 | 7.292916 |
| WNT2B | 4.612244 | 4.842836 | 4.878936 | 5.337069 | 4.744009 | 4.620543 | 4.692362 | 4.825664 | 4.826734 | 6.389043 | 5.322442 | 5.379232 | 4.862772 |
| CHRDL1 | 5.359514 | 4.85359 | 5.189166 | 5.500309 | 4.874102 | 4.812567 | 4.775519 | 4.494887 | 5.170334 | 5.038649 | 4.937008 | 5.584572 | 4.76816 |
| LOC101930363 | 4.134292 | 3.617378 | 3.893977 | 5.584464 | 3.532055 | 3.729878 | 3.633009 | 3.748438 | 3.381366 | 5.103631 | 3.704361 | 4.028246 | 3.582412 |
| PAPSS2 | 4.82372 | 4.727374 | 5.040052 | 4.9513 | 4.99472 | 4.598997 | 5.213935 | 5.421359 | 5.018291 | 7.461713 | 4.583372 | 4.913417 | 5.523269 |
| FLNC | 6.169085 | 6.276152 | 5.767791 | 7.819725 | 6.240143 | 5.764865 | 6.170388 | 6.929307 | 6.330454 | 6.760446 | 6.470938 | 6.828641 | 6.073524 |
| PLPP1 | 6.227999 | 5.56773 | 5.700275 | 6.326102 | 5.338176 | 5.121091 | 5.667554 | 5.969517 | 6.47387 | 7.208971 | 5.548115 | 5.220152 | 5.533443 |
| AQP9 | 5.766658 | 6.256713 | 5.517166 | 8.319289 | 5.600473 | 5.946158 | 6.278066 | 5.408564 | 5.267103 | 5.676023 | 6.213756 | 6.174832 | 5.390204 |
| TMEM255A | 3.109168 | 2.867563 | 3.105603 | 3.04829 | 3.104269 | 3.018698 | 3.010177 | 2.945732 | 2.951169 | 5.32494 | 3.078038 | 3.282944 | 2.924069 |
| HOXC6 | 6.228239 | 6.121894 | 6.127222 | 7.162011 | 6.458148 | 5.882935 | 7.227243 | 6.482752 | 5.710285 | 8.293648 | 5.967415 | 6.076297 | 6.536903 |
| LOC101926921 | 6.263244 | 6.334931 | 6.111563 | 7.080971 | 6.535025 | 5.669695 | 7.067965 | 6.151632 | 6.092825 | 8.329813 | 5.878464 | 5.780109 | 6.009031 |
| PCOLCE2 | 3.571026 | 3.17645 | 3.063402 | 3.388402 | 3.120152 | 3.15489 | 3.358836 | 3.235513 | 3.622003 | 4.415331 | 3.307556 | 3.661436 | 3.110601 |
| RNASE4 | 4.28112 | 4.183347 | 4.50042 | 5.602912 | 4.452385 | 4.007827 | 4.5157 | 4.912496 | 4.285661 | 7.735734 | 5.062815 | 4.910739 | 4.061153 |
| TCF21 | 3.831098 | 3.896508 | 4.198473 | 4.013374 | 3.817417 | 3.845923 | 3.965618 | 5.343266 | 3.851831 | 8.528711 | 3.803942 | 3.901845 | 5.326052 |
| LOC101928635 | 5.958846 | 5.196404 | 5.348075 | 9.220382 | 5.387815 | 4.756031 | 5.935877 | 5.244931 | 5.791103 | 5.923575 | 5.282582 | 6.018588 | 4.78444 |
| PKD2 | 4.393309 | 3.60321 | 3.72656 | 6.359525 | 4.366049 | 3.801959 | 5.124193 | 3.634298 | 4.455315 | 5.857067 | 3.778747 | 4.152013 | 4.118343 |
| WNT5A | 3.923283 | 4.021053 | 4.695572 | 4.470088 | 4.803216 | 4.434639 | 4.344229 | 5.263239 | 4.908456 | 7.340029 | 4.526814 | 4.223757 | 5.551035 |
| FGF13 | 4.742622 | 4.320301 | 4.171076 | 4.349003 | 4.944802 | 4.86218 | 4.308684 | 4.393745 | 5.237052 | 5.769853 | 4.368733 | 4.513469 | 4.504931 |
| LHX2 | 3.805842 | 3.758022 | 3.87073 | 3.671765 | 3.626124 | 3.712057 | 3.734565 | 3.792589 | 3.703621 | 3.831691 | 4.14428 | 4.122007 | 3.733593 |
| ATP10D | 4.421728 | 4.266256 | 5.004641 | 5.38559 | 4.714672 | 3.873969 | 4.590011 | 4.673391 | 4.130504 | 5.552182 | 4.466183 | 4.205391 | 4.335246 |
| ARHGAP18 | NA | NA | NA | NA | NA | NA | NA | NA | NA | NA | NA | NA | NA |
| LOC286191 | NA | NA | NA | NA | NA | NA | NA | NA | NA | NA | NA | NA | NA |
| EFEMP1 | 5.414062 | 4.773237 | 5.768193 | 7.725364 | 5.843266 | 4.736542 | 5.288982 | 5.27635 | 5.433716 | 9.18672 | 4.141127 | 4.329988 | 4.577058 |
| LOC100996760 | NA | NA | NA | NA | NA | NA | NA | NA | NA | NA | NA | NA | NA |

| **Gene** | **GSM657600** | **GSM657601** | **GSM657602** | **GSM657603** | **GSM657604** | **GSM657605** | **GSM657606** | **GSM657607** | **GSM657608** | **GSM657609** | **GSM657610** | **GSM657611** | **GSM657612** |
| --- | --- | --- | --- | --- | --- | --- | --- | --- | --- | --- | --- | --- | --- |
| CD24 | 8.755925 | 7.232013 | 9.068585 | 6.820781 | 9.397584 | 8.745434 | 8.569367 | 9.249112 | 9.960032 | 9.163057 | 8.940094 | 8.287129 | 8.709267 |
| CLDN3 | 8.243581 | 6.720694 | 8.717904 | 7.296376 | 9.585238 | 8.841398 | 9.092256 | 9.513496 | 8.175176 | 8.111098 | 9.011611 | 5.800316 | 8.255817 |
| C1orf106 | 8.291209 | 6.635217 | 9.151763 | 6.806915 | 8.476259 | 7.052601 | 8.838774 | 9.006796 | 7.260592 | 8.15449 | 7.803128 | 7.120269 | 8.112414 |
| CRABP2 | 9.532254 | 8.910429 | 10.392817 | 7.270355 | 9.206224 | 10.062868 | 10.470044 | 12.046625 | 8.87251 | 10.85477 | 11.459476 | 7.790133 | 9.877209 |
| SOX17 | 8.081556 | 7.240903 | 8.33847 | 7.213972 | 8.54373 | 8.817266 | 8.684169 | 8.309432 | 7.795904 | 8.008536 | 8.59787 | 5.513684 | 7.617003 |
| ELF3 | 7.018091 | 4.769389 | 7.892437 | 6.728165 | 8.047945 | 6.69691 | 7.791821 | 8.510585 | 6.681816 | 7.278095 | 7.294519 | 6.147426 | 7.159969 |
| EPCAM | 9.037374 | 7.267679 | 8.721916 | 6.760464 | 9.186494 | 9.803606 | 9.327281 | 9.003279 | 9.402041 | 9.047475 | 9.198299 | 7.084853 | 9.152569 |
| SCGB2A1 | 10.910774 | 5.720785 | 5.887583 | 3.614826 | 9.91279 | 4.662305 | 9.46737 | 7.668605 | 10.729914 | 4.802892 | 9.589165 | 9.844149 | 8.207069 |
| KLK6 | 8.193619 | 6.49546 | 8.651583 | 5.661427 | 9.24157 | 8.003708 | 9.294496 | 10.430078 | 7.389638 | 8.221272 | 11.141416 | 6.682376 | 7.338554 |
| MMP7 | 10.586939 | 5.543948 | 8.350411 | 4.644456 | 7.021926 | 5.16881 | 9.66991 | 8.491561 | 8.168467 | 6.760643 | 4.912794 | 9.357444 | 9.389708 |
| CLDN4 | 6.038724 | 5.088336 | 6.983257 | 5.885212 | 7.184297 | 6.694801 | 6.898575 | 7.266497 | 6.558339 | 5.937607 | 6.721717 | 5.006213 | 5.97587 |
| CKS2 | 9.603342 | 10.404407 | 7.351385 | 6.251841 | 8.680313 | 9.189359 | 7.513857 | 8.151411 | 11.276602 | 7.687171 | 9.717476 | 8.922017 | 7.731507 |
| CP | 8.533368 | 8.135791 | 8.228136 | 5.498507 | 8.792123 | 8.176274 | 7.032678 | 7.297938 | 9.544006 | 7.013885 | 5.614779 | 6.75342 | 8.591274 |
| PSAT1 | 6.8986 | 8.73079 | 5.955883 | 5.070904 | 6.526406 | 7.050464 | 5.676111 | 7.011482 | 6.322685 | 5.616781 | 6.381647 | 5.916658 | 5.722765 |
| MECOM | 5.408197 | 5.451296 | 5.092666 | 4.30988 | 5.228485 | 5.873165 | 5.496165 | 5.278944 | 5.215311 | 5.643227 | 5.079299 | 5.280596 | 5.912672 |
| ESRP1 | 6.998692 | 5.507324 | 6.792924 | 5.826678 | 7.691976 | 7.294942 | 6.684407 | 7.397268 | 7.054568 | 7.014066 | 7.218891 | 6.935602 | 7.437729 |
| WFDC2 | 11.605279 | 8.74367 | 10.675403 | 10.001989 | 11.422824 | 11.848256 | 10.551093 | 11.280025 | 10.78398 | 9.175761 | 12.201477 | 9.43412 | 9.858444 |
| CEP55 | 6.749532 | 6.464981 | 6.042008 | 4.321217 | 5.96523 | 6.181238 | 5.943426 | 6.00531 | 6.984025 | 6.796568 | 7.081174 | 4.927231 | 6.709619 |
| MUC1 | 8.024405 | 6.528593 | 9.584818 | 6.365622 | 8.598125 | 8.974314 | 8.863054 | 8.631472 | 7.744119 | 8.8325 | 9.044689 | 7.501383 | 7.273543 |
| MCM2 | 7.814876 | 8.066394 | 7.468005 | 7.17849 | 8.724472 | 8.82166 | 7.936523 | 7.944104 | 8.044026 | 7.695676 | 7.984533 | 7.61346 | 6.580149 |
| FAM83D | NA | NA | NA | NA | NA | NA | NA | NA | NA | NA | NA | NA | NA |
| ZWINT | 7.872021 | 9.38428 | 6.876332 | 6.0725 | 8.112686 | 8.725244 | 6.971146 | 8.257444 | 7.849046 | 7.746676 | 8.435127 | 6.306806 | 7.703619 |
| NEK2 | 5.170676 | 6.673737 | 5.452084 | 4.558125 | 6.209171 | 5.574883 | 5.380202 | 5.481576 | 6.230706 | 5.110409 | 5.720464 | 5.652972 | 5.3218 |
| BUB1B | 7.617805 | 8.696738 | 5.880199 | 5.751806 | 7.559179 | 7.22438 | 7.471531 | 7.741367 | 7.952434 | 7.274971 | 7.58679 | 6.718977 | 7.635621 |
| DLGAP5 | 6.773467 | 7.221043 | 4.329408 | 3.964216 | 6.583272 | 6.27478 | 5.757787 | 5.707507 | 6.521761 | 4.321662 | 5.916059 | 4.599598 | 5.625922 |
| MELK | 8.395069 | 8.169658 | 5.987579 | 6.109217 | 7.97553 | 8.084475 | 6.700141 | 7.498229 | 7.858413 | 7.367435 | 8.070894 | 6.488928 | 7.29848 |
| FZD10 | 3.981805 | 4.448765 | 6.917032 | 4.536956 | 3.937584 | 4.626684 | 5.307916 | 4.346618 | 4.157735 | 4.531999 | 3.819035 | 4.542072 | 5.45837 |
| LPAR3 | 4.861405 | 4.907302 | 4.904401 | 4.28842 | 6.311336 | 5.55389 | 5.037787 | 5.61262 | 4.771805 | 5.60263 | 5.320668 | 5.708893 | 5.299683 |
| ITLN1 | NA | NA | NA | NA | NA | NA | NA | NA | NA | NA | NA | NA | NA |
| LINC01105 | NA | NA | NA | NA | NA | NA | NA | NA | NA | NA | NA | NA | NA |
| ANXA8L1 | 6.739849 | 6.306297 | 6.871194 | 6.735077 | 7.143035 | 6.728569 | 6.662458 | 6.101286 | 7.237405 | 6.595403 | 6.484006 | 6.926933 | 6.324073 |
| DFNA5 | 5.975079 | 5.441862 | 6.022821 | 6.957421 | 5.87018 | 5.156699 | 5.514806 | 5.281897 | 5.155152 | 5.251025 | 4.989771 | 5.350757 | 5.448347 |
| PRG4 | 3.104065 | 3.121464 | 3.201104 | 3.147991 | 3.151583 | 3.514871 | 3.191371 | 3.065188 | 3.561457 | 3.258661 | 3.265597 | 3.831882 | 3.548631 |
| ABCA8 | 4.266814 | 3.782537 | 4.370733 | 8.172785 | 4.546883 | 4.164212 | 3.854186 | 3.787788 | 3.966984 | 3.775612 | 3.908664 | 3.949841 | 4.563079 |
| PROCR | 3.824056 | 4.158606 | 3.555582 | 5.427829 | 4.268884 | 3.300786 | 3.501489 | 3.400895 | 4.241807 | 3.212049 | 3.20739 | 3.47396 | 3.602317 |
| CHGB | 3.866755 | 3.670336 | 3.935155 | 3.658471 | 3.654042 | 3.953739 | 3.85746 | 3.688922 | 3.475633 | 3.898579 | 3.901039 | 4.418314 | 3.927455 |
| AOX1 | 4.770274 | 5.233782 | 5.650381 | 6.720491 | 4.838002 | 4.921943 | 4.868987 | 4.648712 | 4.761394 | 4.87152 | 4.845072 | 5.513315 | 5.201531 |
| CALB2 | 5.956767 | 4.856083 | 5.240299 | 5.007196 | 6.674818 | 5.823402 | 5.709048 | 5.047019 | 5.332292 | 5.644817 | 5.184232 | 5.241907 | 4.994112 |
| HAND2-AS1 | 4.097522 | 4.442393 | 4.655979 | 4.27951 | 4.431581 | 4.621814 | 4.210208 | 4.364331 | 4.351007 | 4.738933 | 4.587362 | 5.151848 | 4.373718 |
| BNC1 | 4.673031 | 4.841457 | 4.65782 | 4.404228 | 4.702247 | 4.833827 | 4.823478 | 4.521199 | 5.133271 | 4.710877 | 4.694781 | 4.992229 | 4.710919 |
| BCHE | 3.682409 | 3.472424 | 3.689319 | 7.91825 | 4.245577 | 3.405448 | 3.308356 | 3.183894 | 3.497732 | 3.516774 | 3.244989 | 3.90793 | 4.323441 |
| CLEC4M | 4.277256 | 4.405623 | 4.581248 | 4.324229 | 4.255101 | 4.353812 | 4.297658 | 4.389153 | 4.139978 | 4.399592 | 4.67532 | 5.21387 | 4.282052 |
| NPY1R | 2.95968 | 3.174226 | 3.064271 | 6.606709 | 3.58346 | 3.331043 | 3.063072 | 3.234619 | 3.428532 | 2.993209 | 3.151251 | 3.790714 | 3.4598 |
| TCEAL2 | 4.249146 | 5.048461 | 4.311411 | 5.709278 | 4.532561 | 4.020976 | 3.639404 | 4.986563 | 5.94484 | 3.8915 | 3.469719 | 4.229614 | 4.171491 |
| MNDA | 6.066452 | 3.409856 | 3.632303 | 3.885097 | 3.834932 | 3.327251 | 3.687204 | 3.51242 | 4.534563 | 3.619395 | 3.591268 | 3.680283 | 4.261966 |
| PDE8B | 5.069649 | 5.363552 | 5.176643 | 6.074282 | 5.309364 | 5.335071 | 5.271797 | 5.37653 | 5.076586 | 5.52443 | 5.257721 | 5.882452 | 5.260846 |
| REEP1 | 4.531944 | 5.131913 | 4.378479 | 6.065924 | 5.002728 | 4.94276 | 4.515129 | 4.255117 | 5.149152 | 4.81657 | 4.628344 | 5.928338 | 4.828586 |
| ADH1C | 3.403444 | 3.350653 | 3.521183 | 3.583366 | 3.363594 | 3.324772 | 3.602674 | 3.640876 | 4.147746 | 3.38052 | 3.502439 | 3.609149 | 3.737207 |
| SPOCK1 | 5.469664 | 5.355703 | 5.253228 | 6.729587 | 6.365027 | 5.467156 | 5.560448 | 5.104995 | 5.286293 | 6.286684 | 4.969179 | 5.681665 | 6.441056 |
| KDR | 4.143517 | 3.955434 | 4.320752 | 5.403418 | 4.711999 | 4.118588 | 4.121152 | 4.503345 | 4.526457 | 4.170453 | 4.402115 | 4.418375 | 4.539694 |
| GADL1 | NA | NA | NA | NA | NA | NA | NA | NA | NA | NA | NA | NA | NA |
| SFRP1 | 4.76043 | 5.123798 | 5.143718 | 6.809834 | 5.086443 | 4.664489 | 4.689989 | 4.438346 | 5.101024 | 4.624548 | 4.47077 | 5.177712 | 5.834635 |
| BAMBI | 4.678273 | 4.742016 | 4.941523 | 6.303022 | 4.643521 | 4.346882 | 4.476401 | 4.756008 | 3.972097 | 4.745458 | 4.598999 | 4.943118 | 5.139928 |
| LGALS2 | 4.310759 | 4.204903 | 4.164347 | 4.108922 | 4.067077 | 4.05297 | 4.035013 | 3.928494 | 3.611494 | 4.054214 | 3.783026 | 5.264156 | 3.579855 |
| DIRAS3 | 3.903119 | 4.088579 | 4.286443 | 4.784615 | 4.22331 | 4.592065 | 4.061182 | 4.013317 | 4.870413 | 4.298445 | 6.820972 | 4.380441 | 4.21169 |
| C21orf62 | 4.181431 | 4.304146 | 4.520886 | 4.204903 | 4.155082 | 4.36194 | 4.140364 | 4.262692 | 4.193522 | 4.315007 | 4.686818 | 4.911077 | 4.491578 |
| TCEAL7 | NA | NA | NA | NA | NA | NA | NA | NA | NA | NA | NA | NA | NA |
| OGN | 3.048819 | 3.010662 | 3.092397 | 6.107435 | 3.266651 | 3.07623 | 3.04805 | 2.988111 | 2.938679 | 3.11974 | 3.034858 | 3.407844 | 4.463417 |
| SYT4 | NA | NA | NA | NA | NA | NA | NA | NA | NA | NA | NA | NA | NA |
| LOC100506718 | 4.512434 | 4.733342 | 5.447865 | 6.570204 | 5.033785 | 4.923188 | 4.980258 | 5.136423 | 4.283869 | 5.523206 | 5.001074 | 4.940896 | 5.681695 |
| GPRASP1 | 4.683802 | 5.306894 | 5.486666 | 7.413343 | 4.708063 | 5.191305 | 4.430231 | 4.442504 | 4.770839 | 4.798585 | 4.676833 | 4.869757 | 5.358405 |
| NELL2 | 6.398775 | 6.234293 | 6.504187 | 5.033183 | 5.316262 | 5.751154 | 5.584006 | 5.639147 | 5.474785 | 5.897608 | 5.683532 | 5.936574 | 6.323382 |
| AADACL2 | NA | NA | NA | NA | NA | NA | NA | NA | NA | NA | NA | NA | NA |
| GHR | 3.289402 | 3.731484 | 4.179741 | 6.468551 | 3.749391 | 3.40954 | 3.770124 | 3.916618 | 3.687819 | 3.522651 | 3.567634 | 3.550865 | 4.07485 |
| ADH1B | 3.753331 | 3.631375 | 3.894717 | 7.475361 | 4.011617 | 3.746232 | 4.545897 | 4.244875 | 3.641922 | 3.740822 | 3.682304 | 4.095474 | 4.45188 |
| MGARP | NA | NA | NA | NA | NA | NA | NA | NA | NA | NA | NA | NA | NA |
| IGFBP6 | 6.155242 | 5.936639 | 7.549278 | 10.129746 | 7.104909 | 5.72448 | 5.54925 | 6.615136 | 5.557889 | 6.003001 | 5.346262 | 6.233495 | 6.80509 |
| GFPT2 | 5.368414 | 5.530845 | 6.713577 | 6.316844 | 6.422952 | 5.798334 | 5.740956 | 5.60456 | 4.821083 | 6.232973 | 5.398593 | 6.695336 | 6.039789 |
| OLFML1 | 5.307615 | 5.031871 | 5.519288 | 7.98438 | 5.947564 | 5.098449 | 5.110277 | 5.42919 | 5.120408 | 5.622625 | 5.192544 | 5.497391 | 6.097991 |
| NAP1L3 | 3.88558 | 5.032615 | 4.301458 | 5.646776 | 4.330418 | 4.866381 | 3.308356 | 4.531784 | 3.504894 | 3.67525 | 3.614778 | 3.724516 | 4.156632 |
| HBB | 7.171625 | 6.806998 | 7.843632 | 10.707887 | 6.983269 | 7.320079 | 8.717562 | 7.189188 | 10.092406 | 6.168217 | 7.704918 | 7.472661 | 7.631856 |
| DAPK1-IT1 | NA | NA | NA | NA | NA | NA | NA | NA | NA | NA | NA | NA | NA |
| ALDH1A1 | 4.60232 | 3.342493 | 3.70913 | 7.587181 | 5.389775 | 3.427896 | 3.546306 | 3.331097 | 5.642954 | 3.487179 | 3.236684 | 3.622747 | 4.073755 |
| LRRN4 | NA | NA | NA | NA | NA | NA | NA | NA | NA | NA | NA | NA | NA |
| HAS1 | 4.232772 | 4.912677 | 5.173376 | 4.68089 | 5.185059 | 4.850218 | 4.502007 | 4.508661 | 4.499222 | 4.499698 | 4.890267 | 5.375889 | 5.142251 |
| LXN | 7.298263 | 6.550452 | 6.906427 | 6.31377 | 7.417236 | 5.341917 | 6.106654 | 6.580801 | 7.241006 | 6.260201 | 4.900321 | 4.992993 | 7.026782 |
| CLDN15 | 6.738414 | 6.850538 | 7.575158 | 7.935797 | 7.243438 | 7.250233 | 7.369697 | 7.204457 | 7.34185 | 7.468865 | 7.490429 | 7.386159 | 7.24781 |
| PDGFD | 5.799079 | 6.432507 | 5.38971 | 6.469434 | 6.382811 | 5.355962 | 5.538256 | 6.138133 | 6.168248 | 5.141057 | 5.261642 | 5.760828 | 7.749536 |
| PRSS35 | NA | NA | NA | NA | NA | NA | NA | NA | NA | NA | NA | NA | NA |
| HBA2 | 6.506822 | 6.284857 | 7.903678 | 11.304598 | 7.088137 | 7.114205 | 9.105756 | 7.672764 | 8.094888 | 6.625827 | 7.511176 | 6.872796 | 7.679793 |
| WNT2B | 4.717221 | 5.674495 | 4.804318 | 4.682289 | 4.619632 | 4.682129 | 4.887842 | 4.582259 | 4.618941 | 4.786862 | 4.840407 | 5.466066 | 4.758737 |
| CHRDL1 | 5.444968 | 6.502445 | 6.288248 | 9.599661 | 5.971347 | 5.32228 | 4.989041 | 5.33609 | 4.638931 | 4.830045 | 5.289062 | 5.229739 | 5.504141 |
| LOC101930363 | 3.644945 | 3.647281 | 4.341274 | 3.645076 | 3.353213 | 3.577916 | 4.488414 | 3.450363 | 4.345609 | 3.805924 | 3.597681 | 4.023047 | 3.89716 |
| PAPSS2 | 4.832375 | 4.832609 | 4.91517 | 5.527058 | 5.156988 | 4.573893 | 4.773548 | 4.876377 | 4.687659 | 4.938755 | 4.621045 | 5.132513 | 5.382107 |
| FLNC | 6.174956 | 7.955401 | 5.76248 | 8.459811 | 6.789089 | 6.673674 | 6.535635 | 6.113322 | 5.543399 | 6.545779 | 6.051815 | 6.831225 | 6.096014 |
| PLPP1 | 6.031803 | 5.044199 | 5.832091 | 8.543018 | 6.514802 | 5.441193 | 5.791131 | 6.03338 | 5.936527 | 5.544961 | 5.149603 | 5.451174 | 6.615789 |
| AQP9 | 5.917747 | 5.066743 | 5.79239 | 5.515125 | 5.679925 | 5.913951 | 5.6441 | 5.781349 | 6.169747 | 5.595737 | 5.891904 | 6.702672 | 5.986526 |
| TMEM255A | 3.095049 | 2.987463 | 3.209021 | 4.27423 | 2.920169 | 2.964542 | 2.861898 | 2.879673 | 3.003389 | 3.0383 | 3.044893 | 3.098976 | 3.337957 |
| HOXC6 | 6.400359 | 6.217467 | 6.476766 | 8.475085 | 6.951785 | 5.883037 | 5.706813 | 5.908237 | 5.985944 | 6.585324 | 5.804662 | 6.782731 | 6.991015 |
| LOC101926921 | 6.108519 | 5.518416 | 6.189066 | 8.164612 | 6.732087 | 6.043155 | 6.483228 | 6.27798 | 6.091217 | 6.649914 | 5.494174 | 6.171783 | 6.992496 |
| PCOLCE2 | 3.206435 | 4.801194 | 3.186263 | 4.230138 | 3.761832 | 3.390995 | 3.434378 | 3.411891 | 3.19502 | 3.22635 | 3.110224 | 3.497758 | 3.37836 |
| RNASE4 | 4.728828 | 4.422564 | 5.030166 | 7.48071 | 4.640111 | 4.617624 | 4.334763 | 4.271929 | 5.166466 | 4.215044 | 3.96402 | 4.595994 | 4.445846 |
| TCF21 | 3.959488 | 3.903848 | 5.306766 | 6.18964 | 4.189214 | 3.695092 | 4.123249 | 3.955875 | 3.756325 | 3.769617 | 3.871893 | 4.301058 | 3.919199 |
| LOC101928635 | 5.250999 | 9.473884 | 5.914498 | 7.2212 | 6.203262 | 5.663346 | 5.183857 | 5.150535 | 5.562731 | 5.66289 | 5.12201 | 6.013181 | 5.5791 |
| PKD2 | 4.495026 | 3.01241 | 4.686439 | 6.690082 | 4.76164 | 4.689669 | 4.3081 | 4.463282 | 4.189572 | 4.472219 | 3.546056 | 3.335965 | 4.596498 |
| WNT5A | 4.75287 | 5.453205 | 5.323643 | 4.021514 | 4.26876 | 4.472135 | 4.291184 | 4.404993 | 5.885111 | 5.431101 | 4.074913 | 4.035801 | 4.937659 |
| FGF13 | 4.415229 | 4.839088 | 4.463473 | 5.805998 | 4.989695 | 5.230595 | 4.557751 | 4.781204 | 4.079893 | 4.28687 | 5.483888 | 4.498966 | 4.57564 |
| LHX2 | 3.711691 | 4.274735 | 3.846475 | 3.631398 | 3.748172 | 3.572508 | 3.652851 | 3.619406 | 3.766803 | 8.214509 | 3.818913 | 4.366239 | 3.832401 |
| ATP10D | 4.884052 | 4.225967 | 4.404834 | 5.468185 | 4.893529 | 4.715667 | 4.163627 | 4.669186 | 4.558049 | 4.267684 | 3.948807 | 4.519711 | 4.712381 |
| ARHGAP18 | NA | NA | NA | NA | NA | NA | NA | NA | NA | NA | NA | NA | NA |
| LOC286191 | NA | NA | NA | NA | NA | NA | NA | NA | NA | NA | NA | NA | NA |
| EFEMP1 | 5.649495 | 6.26467 | 5.241908 | 9.091451 | 5.736208 | 4.346598 | 5.257163 | 4.944685 | 5.207618 | 4.230672 | 3.789773 | 4.431661 | 5.744745 |
| LOC100996760 | NA | NA | NA | NA | NA | NA | NA | NA | NA | NA | NA | NA | NA |

| **Gene** | **GSM657613** | **GSM657614** | **GSM657615** | **GSM657616** | **GSM657617** | **GSM657618** | **GSM657619** | **GSM657620** | **GSM657621** | **GSM657622** | **GSM657623** | **GSM657624** | **GSM657625** |
| --- | --- | --- | --- | --- | --- | --- | --- | --- | --- | --- | --- | --- | --- |
| CD24 | 9.805004 | 8.330966 | 5.167071 | 9.733182 | 10.206094 | 10.546753 | 8.294419 | 10.346759 | 7.892315 | 9.284173 | 9.109958 | 8.339237 | 8.805981 |
| CLDN3 | 9.215589 | 8.822171 | 4.943695 | 7.970852 | 5.398098 | 8.78207 | 9.497067 | 6.649365 | 6.311352 | 7.243926 | 9.600078 | 6.813804 | 8.807295 |
| C1orf106 | 8.72376 | 7.83157 | 6.770371 | 9.058116 | 8.570075 | 8.261626 | 7.803698 | 7.832314 | 6.843615 | 7.639596 | 9.08496 | 7.184899 | 7.74613 |
| CRABP2 | 11.231709 | 10.257309 | 7.413942 | 9.938353 | 6.940022 | 11.148808 | 9.953588 | 7.309208 | 9.706275 | 9.388215 | 10.777108 | 9.893648 | 10.412963 |
| SOX17 | 8.168449 | 8.595549 | 5.11314 | 8.00766 | 4.668253 | 8.372381 | 7.752931 | 6.367726 | 6.236639 | 7.660857 | 8.609532 | 5.541792 | 7.004715 |
| ELF3 | 6.972976 | 7.193895 | 6.285017 | 6.160946 | 5.213275 | 7.367765 | 8.012011 | 7.415028 | 5.945786 | 6.363485 | 8.100483 | 6.891899 | 7.260735 |
| EPCAM | 9.47799 | 9.18608 | 4.75346 | 10.074476 | 9.177434 | 10.316055 | 9.242496 | 10.254254 | 9.731649 | 8.347718 | 9.897204 | 8.824558 | 8.593444 |
| SCGB2A1 | 10.052844 | 9.245666 | 3.631631 | 6.802848 | 3.432267 | 7.872842 | 7.557926 | 10.1852 | 8.346776 | 4.416231 | 6.390802 | 6.330797 | 9.963671 |
| KLK6 | 9.998122 | 9.698208 | 6.410325 | 7.303744 | 5.015852 | 6.981226 | 8.718237 | 7.703039 | 6.753843 | 7.641092 | 8.026623 | 7.615559 | 10.099538 |
| MMP7 | 7.047803 | 6.669357 | 5.289004 | 8.983882 | 5.079057 | 11.128008 | 10.540427 | 10.525381 | 5.621005 | 9.692171 | 8.057038 | 6.504653 | 7.542004 |
| CLDN4 | 6.461164 | 6.68711 | 4.517568 | 7.106975 | 4.522651 | 7.318907 | 5.905314 | 6.028792 | 5.635694 | 6.173004 | 6.602617 | 5.222875 | 6.669324 |
| CKS2 | 7.600381 | 9.677745 | 4.418931 | 10.269936 | 10.659494 | 9.680384 | 8.686893 | 8.752128 | 8.268991 | 7.883699 | 7.158203 | 8.973975 | 5.902505 |
| CP | 9.328508 | 7.775859 | 5.796151 | 7.849199 | 4.804684 | 7.866347 | 7.911965 | 7.654421 | 6.980134 | 6.496017 | 7.500543 | 7.923297 | 8.342015 |
| PSAT1 | 7.684585 | 6.099186 | 5.631566 | 7.492493 | 7.213942 | 5.28787 | 6.342922 | 5.67556 | 5.493296 | 6.619786 | 5.825308 | 4.905011 | 5.253939 |
| MECOM | 5.197264 | 5.454955 | 4.973281 | 5.248484 | 4.189763 | 5.692104 | 5.832937 | 5.136036 | 5.660078 | 4.96609 | 5.692673 | 5.600217 | 5.164126 |
| ESRP1 | 8.345748 | 6.936487 | 6.414722 | 6.283821 | 5.582003 | 6.896379 | 7.419218 | 6.408026 | 6.601934 | 7.177749 | 7.475504 | 7.025255 | 8.149597 |
| WFDC2 | 8.567301 | 11.60186 | 7.288575 | 9.756216 | 7.034388 | 11.034013 | 11.223079 | 10.522085 | 10.121975 | 9.140845 | 12.266861 | 10.596053 | 10.620657 |
| CEP55 | 6.647765 | 7.828232 | 4.943062 | 6.038182 | 6.341249 | 7.651352 | 7.952438 | 6.165587 | 5.888321 | 6.779252 | 5.923002 | 7.490129 | 5.265992 |
| MUC1 | 9.724934 | 8.226836 | 5.983244 | 7.565985 | 5.466847 | 8.081302 | 8.181131 | 7.184918 | 6.552176 | 7.735252 | 8.954696 | 8.15763 | 9.188016 |
| MCM2 | 8.015118 | 9.006666 | 6.884046 | 8.33065 | 9.050869 | 7.825662 | 7.874052 | 7.052998 | 7.083557 | 7.428449 | 7.576052 | 6.688604 | 7.466795 |
| FAM83D | NA | NA | NA | NA | NA | NA | NA | NA | NA | NA | NA | NA | NA |
| ZWINT | 7.488451 | 8.17044 | 6.273432 | 8.46699 | 8.566175 | 9.638012 | 8.301533 | 7.642982 | 8.083314 | 8.44143 | 7.631043 | 8.177772 | 7.054173 |
| NEK2 | 5.409547 | 6.207911 | 5.110872 | 6.000249 | 6.831041 | 6.030592 | 5.933295 | 5.502429 | 5.720351 | 5.590336 | 5.428611 | 5.31792 | 5.042338 |
| BUB1B | 6.607565 | 6.91802 | 5.768931 | 8.00044 | 8.113796 | 7.879345 | 8.786758 | 7.423985 | 7.149581 | 6.81072 | 6.977098 | 7.37628 | 6.136996 |
| DLGAP5 | 4.791168 | 5.75836 | 4.395681 | 5.426453 | 7.141329 | 6.836659 | 5.574675 | 5.184466 | 4.896899 | 6.003834 | 5.498038 | 6.623542 | 3.951084 |
| MELK | 6.805066 | 7.90932 | 6.444767 | 7.317107 | 7.649295 | 7.559995 | 8.244755 | 7.22423 | 7.1286 | 7.275831 | 7.589079 | 7.40313 | 6.40564 |
| FZD10 | 5.629426 | 4.262183 | 4.693472 | 6.8894 | 3.797468 | 5.541551 | 4.750254 | 6.908034 | 5.862863 | 4.644544 | 4.848063 | 5.021795 | 4.068994 |
| LPAR3 | 6.255348 | 5.624167 | 4.965995 | 5.200527 | 4.650761 | 4.714539 | 5.184668 | 4.767423 | 4.809672 | 4.381778 | 5.068709 | 4.815759 | 5.442114 |
| ITLN1 | NA | NA | NA | NA | NA | NA | NA | NA | NA | NA | NA | NA | NA |
| LINC01105 | NA | NA | NA | NA | NA | NA | NA | NA | NA | NA | NA | NA | NA |
| ANXA8L1 | 6.939818 | 6.815318 | 7.146181 | 6.860018 | 6.215273 | 6.695572 | 6.438162 | 6.935871 | 6.56847 | 6.054005 | 6.681066 | 6.673305 | 6.645286 |
| DFNA5 | 5.200238 | 5.723582 | 5.703807 | 5.255326 | 7.849703 | 5.901866 | 5.361763 | 6.086238 | 5.472693 | 6.697706 | 5.298811 | 5.919927 | 5.328341 |
| PRG4 | 3.192054 | 3.318508 | 4.085928 | 3.303901 | 3.137618 | 3.263568 | 3.341429 | 3.180981 | 3.519057 | 3.383664 | 3.691577 | 3.62406 | 3.225717 |
| ABCA8 | 3.518751 | 6.474374 | 6.290958 | 4.268476 | 5.754725 | 4.211243 | 4.288555 | 4.046434 | 4.267777 | 5.636729 | 3.717836 | 3.676979 | 4.466297 |
| PROCR | 3.448527 | 3.499663 | 3.442506 | 3.319499 | 3.403324 | 3.613542 | 3.274998 | 3.393626 | 3.523866 | 3.408515 | 3.223738 | 3.304991 | 3.130775 |
| CHGB | 3.684083 | 3.854086 | 4.426199 | 3.816228 | 3.832496 | 3.833679 | 3.782688 | 3.811335 | 4.231358 | 3.763138 | 3.715714 | 3.543605 | 4.005359 |
| AOX1 | 4.55846 | 5.389141 | 6.394693 | 5.375247 | 5.131555 | 4.590264 | 5.043097 | 5.532329 | 5.777104 | 5.083648 | 5.409704 | 5.395978 | 5.53442 |
| CALB2 | 5.031945 | 5.3794 | 5.489828 | 4.856417 | 5.232695 | 5.006749 | 5.47456 | 5.124656 | 4.989206 | 5.288705 | 4.942919 | 5.035838 | 5.103974 |
| HAND2-AS1 | 4.154234 | 4.481703 | 5.921122 | 4.767873 | 4.210157 | 4.243597 | 4.353199 | 4.399877 | 5.229658 | 4.416231 | 4.33759 | 4.800264 | 5.004527 |
| BNC1 | 5.005301 | 4.877905 | 5.226445 | 5.221938 | 4.70708 | 4.646998 | 4.823551 | 5.445689 | 5.050388 | 4.673395 | 4.773564 | 5.099038 | 5.018608 |
| BCHE | 3.348179 | 3.257559 | 3.717905 | 3.58374 | 3.778522 | 3.747981 | 4.272357 | 3.300529 | 3.472654 | 3.923128 | 3.23793 | 3.633429 | 3.366948 |
| CLEC4M | 4.351821 | 4.207776 | 5.332881 | 4.420688 | 4.490479 | 4.171546 | 4.266445 | 4.512797 | 4.379971 | 4.131429 | 4.22526 | 4.447675 | 5.291019 |
| NPY1R | 3.304749 | 3.554568 | 3.69534 | 3.304009 | 3.381585 | 3.381091 | 3.478813 | 3.219709 | 3.52954 | 3.559623 | 3.473571 | 3.660496 | 3.108401 |
| TCEAL2 | 3.446676 | 4.951626 | 4.674313 | 3.705293 | 3.892428 | 3.707648 | 3.797188 | 4.070875 | 5.260099 | 4.153972 | 3.364784 | 3.719506 | 4.418128 |
| MNDA | 4.086635 | 4.344951 | 3.942774 | 3.550829 | 3.494695 | 4.132253 | 3.744807 | 3.795902 | 3.94433 | 5.704093 | 3.907843 | 4.113246 | 3.622898 |
| PDE8B | 5.090735 | 5.248718 | 6.504464 | 5.341869 | 5.517621 | 4.99018 | 5.608723 | 5.530631 | 5.766117 | 5.325457 | 5.233297 | 5.474937 | 5.567706 |
| REEP1 | 4.595549 | 5.252329 | 5.598035 | 5.205086 | 7.192232 | 4.352617 | 5.307268 | 4.960672 | 5.65244 | 4.600265 | 4.888818 | 5.016996 | 5.140999 |
| ADH1C | 3.522359 | 3.61539 | 3.665726 | 3.216542 | 4.031853 | 3.41708 | 3.554027 | 3.628057 | 3.543625 | 3.718065 | 3.732472 | 4.085135 | 3.565045 |
| SPOCK1 | 4.924353 | 5.15219 | 6.249264 | 4.944753 | 4.999334 | 5.51558 | 5.448258 | 5.598296 | 5.729648 | 6.064297 | 5.107688 | 6.042321 | 5.32416 |
| KDR | 4.088463 | 4.144885 | 4.689663 | 4.056236 | 4.166799 | 4.316677 | 4.481747 | 4.32135 | 4.366436 | 4.352305 | 4.207769 | 4.391191 | 4.162413 |
| GADL1 | NA | NA | NA | NA | NA | NA | NA | NA | NA | NA | NA | NA | NA |
| SFRP1 | 4.310251 | 5.477873 | 5.438245 | 4.689327 | 5.371552 | 4.374227 | 4.719352 | 5.146282 | 4.933767 | 5.320296 | 4.45486 | 4.506118 | 5.069134 |
| BAMBI | 5.851552 | 6.29745 | 6.650518 | 5.619808 | 8.228724 | 4.681795 | 4.603137 | 5.369112 | 4.944229 | 5.502267 | 4.590697 | 5.060361 | 5.072941 |
| LGALS2 | 4.324141 | 3.653009 | 4.577318 | 4.103841 | 5.510271 | 4.061062 | 3.648389 | 4.011375 | 3.964828 | 4.410792 | 4.013646 | 4.498509 | 4.214551 |
| DIRAS3 | 4.20426 | 5.58919 | 5.513591 | 4.237274 | 4.560508 | 4.217778 | 4.209859 | 4.096034 | 4.603187 | 4.463046 | 4.143559 | 4.364041 | 4.549555 |
| C21orf62 | 4.298293 | 4.254872 | 5.324103 | 4.5873 | 4.329252 | 4.269794 | 4.330523 | 4.617443 | 4.801188 | 4.324127 | 4.428573 | 4.600412 | 4.6549 |
| TCEAL7 | NA | NA | NA | NA | NA | NA | NA | NA | NA | NA | NA | NA | NA |
| OGN | 3.232528 | 5.463309 | 3.527127 | 3.189921 | 3.444947 | 3.040511 | 3.25843 | 3.196135 | 3.394344 | 3.598312 | 3.084289 | 3.428783 | 3.421452 |
| SYT4 | NA | NA | NA | NA | NA | NA | NA | NA | NA | NA | NA | NA | NA |
| LOC100506718 | 4.655965 | 5.567308 | 5.947003 | 4.831209 | 6.135268 | 4.71079 | 4.91119 | 5.322538 | 5.258703 | 5.78645 | 4.899308 | 4.990424 | 5.694926 |
| GPRASP1 | 4.780167 | 5.872542 | 6.56996 | 4.941203 | 5.88084 | 4.869883 | 5.322427 | 5.34664 | 5.388139 | 5.266222 | 4.753819 | 5.003728 | 5.805237 |
| NELL2 | 5.202307 | 5.488671 | 6.196422 | 5.982193 | 6.359231 | 5.682355 | 5.810253 | 5.763659 | 6.246101 | 5.406229 | 5.674035 | 6.176882 | 5.647731 |
| AADACL2 | NA | NA | NA | NA | NA | NA | NA | NA | NA | NA | NA | NA | NA |
| GHR | 3.659547 | 3.957138 | 4.389058 | 3.517927 | 3.547804 | 3.395566 | 3.540342 | 3.248006 | 3.949643 | 5.274031 | 3.25807 | 3.516705 | 3.729203 |
| ADH1B | 3.650822 | 3.688756 | 4.614978 | 3.831427 | 4.572014 | 3.792773 | 4.456048 | 3.822398 | 4.079115 | 6.616742 | 3.654236 | 3.570478 | 3.864997 |
| MGARP | NA | NA | NA | NA | NA | NA | NA | NA | NA | NA | NA | NA | NA |
| IGFBP6 | 6.110063 | 6.823553 | 6.631663 | 6.216761 | 5.54096 | 6.039534 | 6.440103 | 6.619308 | 5.594907 | 6.345528 | 5.569169 | 6.665621 | 5.99162 |
| GFPT2 | 6.013324 | 5.636854 | 6.92503 | 5.602305 | 5.42209 | 5.482144 | 5.634967 | 5.904538 | 5.744422 | 6.098171 | 5.411508 | 5.735877 | 6.264988 |
| OLFML1 | 5.346351 | 5.840197 | 6.017797 | 5.189257 | 4.871463 | 5.044298 | 5.402255 | 5.243429 | 5.176547 | 5.684261 | 5.012431 | 5.16793 | 5.544208 |
| NAP1L3 | 3.77683 | 5.431889 | 4.654653 | 3.663884 | 4.871557 | 3.761142 | 3.413763 | 3.430094 | 4.457077 | 4.275776 | 3.438572 | 3.759974 | 3.73376 |
| HBB | 6.440078 | 10.66992 | 7.228684 | 8.335235 | 6.549251 | 8.826255 | 6.880685 | 6.602295 | 7.133048 | 11.765291 | 6.066813 | 5.924208 | 6.745166 |
| DAPK1-IT1 | NA | NA | NA | NA | NA | NA | NA | NA | NA | NA | NA | NA | NA |
| ALDH1A1 | 3.812016 | 5.742506 | 5.175786 | 3.752757 | 6.104549 | 3.470073 | 3.942399 | 4.02806 | 3.735543 | 5.831453 | 3.289444 | 3.045447 | 3.80132 |
| LRRN4 | NA | NA | NA | NA | NA | NA | NA | NA | NA | NA | NA | NA | NA |
| HAS1 | 4.842195 | 4.746943 | 5.896664 | 5.006836 | 4.683636 | 5.284759 | 4.890579 | 5.04763 | 5.388607 | 5.202133 | 4.869974 | 5.165741 | 5.545214 |
| LXN | 6.47042 | 7.153165 | 5.203195 | 5.859292 | 5.608717 | 6.157769 | 6.206939 | 6.190282 | 5.984642 | 7.697632 | 5.090785 | 5.748714 | 5.500812 |
| CLDN15 | 7.372515 | 7.324216 | 7.575954 | 7.383227 | 6.893115 | 7.378986 | 7.351609 | 7.292058 | 7.488876 | 7.165464 | 7.450847 | 7.43735 | 7.662213 |
| PDGFD | 5.815122 | 6.322214 | 6.643147 | 5.485763 | 5.492348 | 5.412968 | 5.479354 | 5.70623 | 5.265181 | 6.403817 | 5.257065 | 5.626433 | 5.605239 |
| PRSS35 | NA | NA | NA | NA | NA | NA | NA | NA | NA | NA | NA | NA | NA |
| HBA2 | 6.450208 | 9.914858 | 7.101318 | 6.541136 | 6.109887 | 7.850747 | 7.988866 | 6.648597 | 7.330895 | 11.41728 | 6.003363 | 6.544176 | 6.542454 |
| WNT2B | 4.737881 | 5.084989 | 5.54283 | 5.088027 | 4.856193 | 4.709196 | 4.66827 | 5.116599 | 4.962144 | 4.612702 | 4.713103 | 5.034661 | 4.976422 |
| CHRDL1 | 4.736215 | 4.904685 | 5.456011 | 4.500077 | 5.895288 | 5.227776 | 6.082073 | 4.641314 | 5.141796 | 5.824676 | 4.936513 | 4.899863 | 4.811475 |
| LOC101930363 | 3.49783 | 4.965384 | 5.251302 | 3.882369 | 3.465419 | 3.393055 | 4.5165 | 3.781633 | 4.377872 | 3.566046 | 3.456062 | 4.181746 | 4.558548 |
| PAPSS2 | 4.981436 | 5.416923 | 5.231985 | 4.552827 | 5.257263 | 4.862671 | 4.759637 | 5.002721 | 5.186928 | 5.553692 | 4.525911 | 4.973386 | 4.796371 |
| FLNC | 6.354072 | 5.665648 | 6.119957 | 6.72025 | 6.63778 | 6.47249 | 6.172522 | 6.659963 | 5.66629 | 6.31315 | 5.391237 | 6.249929 | 6.420026 |
| PLPP1 | 6.040207 | 5.988156 | 5.869573 | 5.399862 | 5.518212 | 5.523971 | 6.199152 | 5.367621 | 5.452667 | 6.316621 | 5.029175 | 5.310874 | 5.204183 |
| AQP9 | 5.200238 | 6.036373 | 6.962881 | 5.944897 | 4.932745 | 5.365234 | 6.231045 | 6.10275 | 6.213144 | 7.392285 | 5.685488 | 5.918777 | 5.966127 |
| TMEM255A | 2.883713 | 3.328698 | 3.383382 | 3.480684 | 2.782725 | 2.873113 | 3.258526 | 3.374393 | 2.9027 | 3.537267 | 3.076357 | 3.252618 | 3.100995 |
| HOXC6 | 6.061365 | 7.760627 | 6.701826 | 5.835655 | 6.495798 | 6.146885 | 7.322356 | 7.113739 | 7.042758 | 6.042688 | 7.191789 | 6.574907 | 6.796131 |
| LOC101926921 | 6.372523 | 6.444533 | 6.765686 | 5.682827 | 5.72345 | 5.781233 | 6.184152 | 5.771071 | 6.197046 | 7.6468 | 5.855986 | 6.234557 | 6.136603 |
| PCOLCE2 | 3.182302 | 3.436649 | 3.905074 | 3.554434 | 4.975302 | 3.289704 | 3.481208 | 3.295435 | 3.713255 | 4.128542 | 3.084167 | 3.286596 | 3.145486 |
| RNASE4 | 4.214997 | 5.714249 | 5.938768 | 4.267893 | 4.506551 | 4.778514 | 4.467465 | 4.582029 | 4.24867 | 5.584345 | 3.980635 | 4.130574 | 4.595333 |
| TCF21 | 4.256071 | 7.146281 | 4.421372 | 3.912285 | 5.483461 | 3.778765 | 3.777433 | 4.255466 | 3.965259 | 4.147765 | 3.842828 | 3.912285 | 5.737293 |
| LOC101928635 | 4.710809 | 5.940612 | 6.93293 | 6.469837 | 4.864213 | 5.120371 | 5.292852 | 5.77098 | 5.884745 | 5.566257 | 5.239985 | 5.97087 | 5.490623 |
| PKD2 | 3.995024 | 4.383174 | 4.1104 | 3.376978 | 4.379252 | 4.163973 | 5.408153 | 3.397527 | 3.430689 | 4.859697 | 3.959704 | 3.948347 | 4.263463 |
| WNT5A | 4.595625 | 6.316284 | 4.596918 | 5.679956 | 4.54691 | 5.423608 | 4.933325 | 5.60366 | 5.300248 | 5.477799 | 4.479842 | 4.599064 | 4.730423 |
| FGF13 | 4.255042 | 4.620404 | 5.471937 | 4.81589 | 5.811327 | 5.228159 | 4.302085 | 4.4168 | 5.192092 | 4.612755 | 4.00121 | 4.293373 | 4.595529 |
| LHX2 | 3.723036 | 3.918729 | 4.660597 | 3.868848 | 3.728097 | 3.655092 | 3.8241 | 4.103495 | 4.077311 | 3.703106 | 3.972639 | 4.176711 | 3.805567 |
| ATP10D | 4.650409 | 4.832807 | 5.336886 | 4.012089 | 4.62477 | 4.161291 | 4.247974 | 4.510285 | 4.699228 | 5.191468 | 4.281693 | 4.4887 | 4.332273 |
| ARHGAP18 | NA | NA | NA | NA | NA | NA | NA | NA | NA | NA | NA | NA | NA |
| LOC286191 | NA | NA | NA | NA | NA | NA | NA | NA | NA | NA | NA | NA | NA |
| EFEMP1 | 4.285631 | 5.831156 | 5.594257 | 4.200217 | 7.753828 | 5.324458 | 5.178996 | 5.540683 | 4.670568 | 6.83943 | 4.047471 | 4.871554 | 4.774261 |
| LOC100996760 | NA | NA | NA | NA | NA | NA | NA | NA | NA | NA | NA | NA | NA |

| **Gene** | **GSM657626** | **GSM657627** | **GSM657628** | **GSM657629** | **GSM657630** | **GSM657631** | **GSM657632** | **GSM657633** | **GSM657634** | **GSM657635** | **GSM657636** | **GSM657637** | **GSM657638** |
| --- | --- | --- | --- | --- | --- | --- | --- | --- | --- | --- | --- | --- | --- |
| CD24 | 9.516712 | 8.158853 | 9.371306 | 10.084255 | 9.108748 | 6.58932 | 5.972977 | 10.690023 | 8.195389 | 9.280509 | 9.295619 | 4.950592 | 6.773331 |
| CLDN3 | 8.501312 | 6.923785 | 8.010647 | 8.75854 | 8.54125 | 6.382292 | 5.456859 | 9.178395 | 6.153999 | 8.296245 | 7.381322 | 4.544756 | 9.115871 |
| C1orf106 | 9.493102 | 8.035995 | 9.274446 | 8.773672 | 7.902365 | 6.41265 | 6.586354 | 8.406505 | 7.263128 | 8.40373 | 7.847951 | 5.598951 | 8.160388 |
| CRABP2 | 10.307692 | 9.603533 | 9.808114 | 10.323114 | 10.252224 | 7.774147 | 7.4653 | 7.790466 | 8.258068 | 8.961777 | 10.453624 | 6.496344 | 11.112412 |
| SOX17 | 8.794589 | 7.114348 | 7.932715 | 8.633739 | 7.876523 | 5.13605 | 5.400942 | 7.248588 | 7.146571 | 8.364917 | 5.712822 | 6.011017 | 8.629344 |
| ELF3 | 6.659613 | 6.600608 | 7.37492 | 8.017284 | 6.732872 | 6.208291 | 6.52391 | 7.611021 | 6.434628 | 5.770472 | 7.718409 | 4.959464 | 8.952462 |
| EPCAM | 9.472524 | 8.870802 | 8.553746 | 9.046901 | 9.184974 | 5.22414 | 4.658437 | 9.060445 | 7.401301 | 9.41212 | 9.259487 | 4.189024 | 8.517014 |
| SCGB2A1 | 8.005795 | 7.809188 | 7.478281 | 8.585593 | 7.625037 | 4.358122 | 4.173774 | 7.392791 | 6.221488 | 8.235213 | 7.649517 | 4.127641 | 5.054237 |
| KLK6 | 6.771033 | 7.153637 | 8.166342 | 7.941038 | 9.181015 | 5.821701 | 6.982066 | 6.807384 | 6.420801 | 7.358297 | 8.691427 | 5.487386 | 8.550429 |
| MMP7 | 9.757465 | 7.431671 | 9.358442 | 9.55536 | 8.814869 | 6.668967 | 5.790007 | 8.543345 | 6.763664 | 6.46002 | 10.014497 | 4.870977 | 9.32974 |
| CLDN4 | 7.645262 | 5.644847 | 6.4989 | 7.79619 | 7.371641 | 4.874268 | 5.578546 | 7.58639 | 5.666093 | 5.582009 | 6.272455 | 4.318979 | 7.43428 |
| CKS2 | 9.686152 | 7.411508 | 7.99341 | 8.4635 | 10.033279 | 5.680224 | 5.206134 | 7.56806 | 8.447335 | 7.909806 | 10.134613 | 5.174448 | 7.989224 |
| CP | 7.813728 | 7.043962 | 9.557457 | 8.785156 | 8.701922 | 5.907502 | 6.304237 | 8.422531 | 6.084133 | 7.938507 | 5.393999 | 4.887773 | 7.816725 |
| PSAT1 | 7.584693 | 5.607524 | 5.799911 | 6.62584 | 8.536954 | 5.119492 | 6.209959 | 6.258968 | 5.542441 | 6.142692 | 5.535364 | 5.738053 | 5.734574 |
| MECOM | 5.761236 | 5.065491 | 5.63538 | 5.841253 | 5.453554 | 5.933604 | 5.329962 | 5.110117 | 5.446839 | 5.537354 | 5.123949 | 4.584866 | 5.210901 |
| ESRP1 | 7.766966 | 6.207827 | 6.638579 | 6.870234 | 7.412512 | 5.653522 | 7.04734 | 5.856431 | 6.563744 | 7.296526 | 6.425529 | 5.796884 | 6.627625 |
| WFDC2 | 10.865454 | 9.887337 | 11.721247 | 12.175394 | 10.76815 | 7.817449 | 7.586435 | 11.298548 | 9.236767 | 10.708293 | 11.620124 | 7.177288 | 11.238914 |
| CEP55 | 6.22054 | 5.570345 | 5.656299 | 5.809581 | 5.736424 | 4.774605 | 4.792296 | 5.360622 | 5.005199 | 5.021762 | 7.319919 | 4.216882 | 6.80108 |
| MUC1 | 8.625199 | 8.057288 | 9.343517 | 10.349021 | 7.474043 | 7.23673 | 7.50514 | 7.749238 | 7.899283 | 7.699113 | 9.006179 | 6.024188 | 8.236391 |
| MCM2 | 9.033467 | 7.556567 | 8.087288 | 7.966346 | 7.305748 | 6.727869 | 7.15118 | 7.723747 | 7.299584 | 8.599859 | 7.901746 | 6.521336 | 8.518666 |
| FAM83D | NA | NA | NA | NA | NA | NA | NA | NA | NA | NA | NA | NA | NA |
| ZWINT | 8.692428 | 7.179203 | 7.805005 | 8.395752 | 7.598337 | 5.901049 | 5.831957 | 7.226509 | 7.221791 | 6.404318 | 8.75684 | 4.755968 | 8.372831 |
| NEK2 | 6.061095 | 4.800892 | 5.365416 | 6.10324 | 5.457439 | 5.274597 | 5.309527 | 5.155784 | 5.717505 | 4.958084 | 6.442027 | 4.412752 | 5.729319 |
| BUB1B | 7.617811 | 6.489253 | 6.957949 | 7.270893 | 6.551767 | 6.200562 | 5.937393 | 6.463805 | 6.549075 | 6.22548 | 8.473167 | 5.503219 | 6.716282 |
| DLGAP5 | 6.065285 | 4.796843 | 5.954916 | 6.414733 | 5.499452 | 4.321027 | 4.844039 | 5.066834 | 5.967824 | 4.708498 | 7.640501 | 4.02579 | 6.430229 |
| MELK | 7.799417 | 6.776941 | 7.528903 | 7.409678 | 7.513766 | 6.768239 | 6.781518 | 6.499382 | 7.158897 | 6.322225 | 8.124828 | 6.184648 | 7.648202 |
| FZD10 | 5.036345 | 4.587307 | 4.321227 | 5.098281 | 4.646555 | 4.146842 | 5.077087 | 6.348114 | 5.091004 | 7.516963 | 6.296097 | 6.707368 | 4.354188 |
| LPAR3 | 4.940375 | 5.096206 | 4.675395 | 5.165366 | 5.695665 | 5.468025 | 5.478539 | 4.778609 | 5.228774 | 4.364072 | 4.914106 | 4.589473 | 5.609206 |
| ITLN1 | NA | NA | NA | NA | NA | NA | NA | NA | NA | NA | NA | NA | NA |
| LINC01105 | NA | NA | NA | NA | NA | NA | NA | NA | NA | NA | NA | NA | NA |
| ANXA8L1 | 6.704952 | 6.451124 | 6.447942 | 6.145919 | 6.301157 | 6.310434 | 7.393731 | 5.948292 | 6.935208 | 6.28183 | 6.443403 | 6.358079 | 6.86841 |
| DFNA5 | 5.283026 | 6.340295 | 5.393962 | 5.615434 | 5.835278 | 4.941947 | 5.8624 | 5.693178 | 5.814149 | 5.200091 | 5.147915 | 6.194885 | 5.785659 |
| PRG4 | 3.380704 | 3.35211 | 3.380429 | 3.43724 | 3.499497 | 3.622438 | 4.444211 | 3.179083 | 3.881685 | 3.278377 | 3.553521 | 3.37793 | 3.445642 |
| ABCA8 | 4.000862 | 7.914445 | 3.731101 | 3.893177 | 3.666356 | 3.367719 | 4.80763 | 5.981047 | 3.869396 | 5.905604 | 3.763834 | 8.087282 | 4.060834 |
| PROCR | 3.331481 | 3.726335 | 3.513256 | 3.190698 | 3.272184 | 3.574109 | 3.885858 | 4.030715 | 3.216781 | 3.187199 | 3.248751 | 3.916754 | 3.269902 |
| CHGB | 3.799204 | 4.543566 | 3.942147 | 4.172433 | 3.882259 | 4.132043 | 4.081715 | 3.882925 | 4.281167 | 4.351912 | 3.980706 | 6.829908 | 3.968962 |
| AOX1 | 4.886139 | 5.886934 | 4.853434 | 4.875626 | 4.863098 | 5.357453 | 6.287842 | 5.7594 | 5.892001 | 5.296295 | 5.069036 | 5.932382 | 5.130305 |
| CALB2 | 5.552375 | 5.851206 | 4.938584 | 4.773412 | 4.668064 | 5.19412 | 5.286215 | 5.000093 | 5.350916 | 5.657658 | 5.103996 | 5.866807 | 5.382395 |
| HAND2-AS1 | 4.527281 | 4.519437 | 4.442767 | 4.340889 | 4.200981 | 4.690955 | 5.675288 | 4.386177 | 5.373826 | 4.904258 | 4.478856 | 5.134728 | 4.473746 |
| BNC1 | 4.796579 | 4.597895 | 4.941601 | 4.661828 | 4.706125 | 5.103278 | 5.639725 | 4.680754 | 5.098629 | 4.703973 | 4.701045 | 5.241233 | 4.908479 |
| BCHE | 3.649295 | 3.515014 | 3.499696 | 3.226298 | 3.353358 | 3.861335 | 4.170157 | 4.449437 | 3.981666 | 3.315771 | 3.540911 | 4.167789 | 3.546558 |
| CLEC4M | 4.395002 | 4.178079 | 4.474483 | 4.275325 | 4.327919 | 4.954798 | 5.284158 | 4.100576 | 4.944982 | 4.485021 | 4.381736 | 4.727898 | 4.558071 |
| NPY1R | 3.527434 | 3.338214 | 3.724096 | 3.549606 | 3.498652 | 3.559572 | 4.33077 | 4.014059 | 4.316179 | 3.517086 | 4.09937 | 3.784218 | 3.677661 |
| TCEAL2 | 4.546576 | 7.303999 | 3.645542 | 3.773739 | 3.287071 | 3.598639 | 4.026842 | 4.204548 | 4.709584 | 5.442581 | 4.285846 | 7.935391 | 3.618111 |
| MNDA | 3.854158 | 3.862963 | 4.122633 | 3.552853 | 3.703878 | 3.838705 | 4.110445 | 5.154762 | 4.262389 | 3.794077 | 3.866482 | 3.858602 | 4.170935 |
| PDE8B | 5.203333 | 5.43457 | 5.406467 | 5.169535 | 5.257181 | 5.804361 | 6.387411 | 5.13655 | 5.658709 | 5.758965 | 5.238095 | 5.513073 | 5.345438 |
| REEP1 | 4.868757 | 4.723758 | 4.906506 | 4.59162 | 5.036883 | 5.164038 | 6.267937 | 5.163356 | 5.611543 | 5.743355 | 5.463469 | 5.127245 | 4.897899 |
| ADH1C | 3.583752 | 3.589158 | 3.633367 | 3.520715 | 3.545787 | 3.707387 | 4.180298 | 3.576609 | 3.792715 | 3.543319 | 3.852009 | 3.928924 | 3.676862 |
| SPOCK1 | 5.351919 | 6.144616 | 5.107028 | 4.897767 | 5.220815 | 5.652746 | 6.489245 | 5.77464 | 6.092995 | 5.890117 | 5.559619 | 5.801104 | 5.162884 |
| KDR | 4.250721 | 4.691058 | 4.294766 | 4.314822 | 4.128388 | 4.246072 | 4.503539 | 4.61951 | 4.494219 | 4.334491 | 4.190886 | 4.621283 | 4.430598 |
| GADL1 | NA | NA | NA | NA | NA | NA | NA | NA | NA | NA | NA | NA | NA |
| SFRP1 | 4.495891 | 5.060264 | 4.623602 | 4.54301 | 4.622977 | 4.507593 | 5.402521 | 6.448588 | 5.187367 | 5.08504 | 4.972704 | 5.752274 | 4.818058 |
| BAMBI | 4.808695 | 8.038445 | 5.355885 | 6.32384 | 4.761145 | 5.944427 | 5.49408 | 4.733027 | 5.325723 | 6.851884 | 5.533934 | 5.921971 | 5.070468 |
| LGALS2 | 3.553128 | 3.958893 | 4.27006 | 3.711998 | 3.892427 | 6.077719 | 4.50454 | 4.062768 | 3.749928 | 3.852311 | 4.180994 | 3.885146 | 4.051726 |
| DIRAS3 | 4.326616 | 6.721188 | 4.54532 | 4.307901 | 4.533088 | 4.062622 | 5.222425 | 4.199613 | 4.554736 | 5.071369 | 4.150042 | 7.14079 | 4.776826 |
| C21orf62 | 4.263117 | 4.608963 | 4.159822 | 4.196341 | 4.273223 | 4.969901 | 5.131239 | 4.18876 | 4.917199 | 4.634575 | 4.144012 | 4.587113 | 4.462803 |
| TCEAL7 | NA | NA | NA | NA | NA | NA | NA | NA | NA | NA | NA | NA | NA |
| OGN | 3.063595 | 4.405603 | 3.245703 | 3.143196 | 2.999112 | 3.376763 | 3.92707 | 3.499389 | 3.44714 | 3.840448 | 3.15606 | 3.674603 | 3.085091 |
| SYT4 | NA | NA | NA | NA | NA | NA | NA | NA | NA | NA | NA | NA | NA |
| LOC100506718 | 4.632819 | 6.75964 | 4.968773 | 5.590046 | 4.587713 | 5.128998 | 5.532896 | 5.435134 | 5.293728 | 6.469233 | 4.83424 | 6.692208 | 4.673892 |
| GPRASP1 | 4.593586 | 7.288619 | 4.902392 | 4.904745 | 4.719813 | 5.026076 | 5.774073 | 5.551714 | 5.650304 | 5.664688 | 4.574992 | 7.756514 | 5.108221 |
| NELL2 | 5.326617 | 5.664508 | 5.438956 | 5.670789 | 5.775652 | 6.431248 | 6.612899 | 5.444282 | 6.19996 | 5.734598 | 5.884996 | 5.63826 | 5.828453 |
| AADACL2 | NA | NA | NA | NA | NA | NA | NA | NA | NA | NA | NA | NA | NA |
| GHR | 3.847827 | 4.92772 | 4.242074 | 3.948609 | 4.027004 | 3.723043 | 4.258349 | 5.629487 | 4.506473 | 3.965418 | 3.605764 | 4.784638 | 3.650123 |
| ADH1B | 3.752155 | 3.744596 | 3.606463 | 3.559444 | 3.683717 | 4.069718 | 4.681135 | 6.656518 | 4.21528 | 3.830148 | 3.596947 | 4.022027 | 3.844483 |
| MGARP | NA | NA | NA | NA | NA | NA | NA | NA | NA | NA | NA | NA | NA |
| IGFBP6 | 5.331252 | 8.338577 | 6.022932 | 6.391087 | 5.565828 | 5.147039 | 5.722079 | 7.332622 | 5.054203 | 6.772035 | 5.791681 | 8.774909 | 6.216041 |
| GFPT2 | 5.31744 | 6.350813 | 5.780247 | 5.352752 | 5.441088 | 6.048808 | 6.563123 | 5.859654 | 6.037915 | 5.503078 | 5.034156 | 7.75659 | 5.878775 |
| OLFML1 | 5.213163 | 6.734127 | 4.989911 | 4.946183 | 5.054617 | 5.208455 | 5.888046 | 5.664701 | 5.141059 | 5.621639 | 4.855391 | 6.527236 | 5.046092 |
| NAP1L3 | 4.312746 | 5.639885 | 4.046723 | 3.988564 | 3.977728 | 3.836406 | 3.911815 | 4.34205 | 3.905378 | 5.613877 | 3.719678 | 5.057612 | 3.690317 |
| HBB | 10.288467 | 8.184501 | 6.680075 | 6.883456 | 6.979697 | 6.426624 | 6.728958 | 9.191231 | 8.028032 | 8.566542 | 7.182958 | 8.704744 | 7.730256 |
| DAPK1-IT1 | NA | NA | NA | NA | NA | NA | NA | NA | NA | NA | NA | NA | NA |
| ALDH1A1 | 3.477084 | 6.418061 | 3.317621 | 4.807732 | 3.876279 | 3.309033 | 3.67106 | 4.29119 | 3.38308 | 5.124848 | 3.238648 | 4.597317 | 4.429588 |
| LRRN4 | NA | NA | NA | NA | NA | NA | NA | NA | NA | NA | NA | NA | NA |
| HAS1 | 4.554681 | 5.174744 | 5.14648 | 5.281508 | 4.926013 | 5.037486 | 6.042798 | 4.956703 | 5.356238 | 5.06311 | 4.847633 | 8.204789 | 5.437303 |
| LXN | 5.89443 | 6.861446 | 6.229468 | 6.062666 | 6.394644 | 4.197245 | 5.436734 | 6.099994 | 4.730067 | 6.219161 | 6.381187 | 6.563766 | 6.329728 |
| CLDN15 | 7.225275 | 7.240136 | 7.519017 | 7.14508 | 7.294331 | 7.615658 | 7.458005 | 7.25578 | 7.374543 | 7.730536 | 7.161366 | 7.579308 | 7.196941 |
| PDGFD | 5.97719 | 8.159695 | 5.055686 | 5.285136 | 6.113107 | 5.13605 | 6.124053 | 6.436888 | 5.795417 | 5.981033 | 5.714543 | 7.597496 | 6.343945 |
| PRSS35 | NA | NA | NA | NA | NA | NA | NA | NA | NA | NA | NA | NA | NA |
| HBA2 | 8.623977 | 9.02111 | 6.800843 | 6.98323 | 5.982538 | 7.186007 | 6.986423 | 9.918698 | 7.347942 | 8.59224 | 6.714415 | 9.600133 | 7.909123 |
| WNT2B | 4.875752 | 4.929563 | 5.065297 | 4.758876 | 4.718803 | 5.529628 | 5.444582 | 5.017555 | 5.175615 | 5.122833 | 5.197534 | 5.322636 | 4.811979 |
| CHRDL1 | 4.760179 | 5.178275 | 5.410579 | 4.827675 | 5.925317 | 4.733756 | 5.787189 | 6.679899 | 6.158409 | 5.261901 | 5.548731 | 5.849255 | 5.807075 |
| LOC101930363 | 3.608842 | 4.998483 | 3.832924 | 3.545573 | 3.861874 | 3.974408 | 4.251124 | 3.66324 | 4.375117 | 3.79254 | 3.624802 | 5.139615 | 4.239601 |
| PAPSS2 | 4.622642 | 5.467544 | 4.821438 | 4.654838 | 4.716186 | 4.782135 | 5.43377 | 5.28282 | 5.070626 | 5.224095 | 4.829412 | 5.764909 | 4.75399 |
| FLNC | 6.025849 | 6.652477 | 5.88059 | 5.705168 | 5.97522 | 6.722671 | 6.533251 | 6.965494 | 6.26885 | 6.247713 | 5.727552 | 7.350186 | 5.53286 |
| PLPP1 | 4.882553 | 5.789691 | 5.309508 | 5.372415 | 5.919835 | 5.099176 | 5.786548 | 6.642458 | 5.463033 | 5.781331 | 5.357394 | 5.690864 | 6.101336 |
| AQP9 | 5.79888 | 5.329746 | 5.937159 | 6.031468 | 6.073819 | 5.706185 | 7.086206 | 5.693024 | 6.934809 | 5.86364 | 5.922615 | 5.714815 | 6.028646 |
| TMEM255A | 2.936228 | 3.924942 | 3.309646 | 2.941883 | 3.157978 | 3.129311 | 3.279901 | 3.120043 | 3.27174 | 3.612747 | 2.956482 | 3.552262 | 3.066903 |
| HOXC6 | 6.117127 | 8.241988 | 6.242488 | 6.431703 | 5.648182 | 5.936895 | 7.160788 | 6.068915 | 6.810234 | 6.808386 | 6.124899 | 8.684975 | 6.833592 |
| LOC101926921 | 5.868396 | 6.614214 | 5.87188 | 5.626846 | 5.706136 | 5.517305 | 7.000496 | 6.8389 | 6.673334 | 6.942361 | 6.001286 | 6.650959 | 6.011854 |
| PCOLCE2 | 3.303421 | 3.47239 | 3.17889 | 3.099107 | 3.250874 | 3.390738 | 4.017075 | 3.717255 | 3.619059 | 3.454836 | 3.653879 | 3.477859 | 3.473819 |
| RNASE4 | 4.368163 | 7.101399 | 4.297171 | 4.198472 | 4.636941 | 4.388175 | 4.656374 | 5.512892 | 4.671714 | 4.976622 | 4.205976 | 6.308054 | 4.180434 |
| TCF21 | 3.686277 | 6.965887 | 4.105423 | 4.501247 | 3.940595 | 4.483431 | 4.322514 | 4.428634 | 4.141279 | 6.355858 | 3.908044 | 5.449536 | 3.890265 |
| LOC101928635 | 6.515018 | 6.100648 | 5.194217 | 4.962936 | 5.352836 | 5.382079 | 5.766258 | 5.422213 | 6.066694 | 5.904982 | 5.584948 | 7.127996 | 5.813942 |
| PKD2 | 3.973213 | 5.271454 | 3.480715 | 3.583197 | 4.047638 | 3.847073 | 3.977157 | 4.20779 | 3.962229 | 4.280485 | 3.695133 | 4.683114 | 4.145018 |
| WNT5A | 4.955354 | 5.570621 | 4.554807 | 5.567721 | 4.894002 | 4.518514 | 4.854349 | 4.971447 | 4.82959 | 5.161091 | 4.890381 | 4.748002 | 5.120046 |
| FGF13 | 4.66469 | 4.874878 | 4.525642 | 4.40421 | 4.731282 | 3.959402 | 5.073478 | 4.659792 | 5.209274 | 5.776805 | 5.86165 | 4.759344 | 4.417605 |
| LHX2 | 3.73174 | 3.677307 | 3.980042 | 3.75239 | 3.935496 | 4.263618 | 4.485852 | 3.610109 | 4.167243 | 3.812581 | 3.822787 | 4.16789 | 4.057891 |
| ATP10D | 4.266478 | 5.193326 | 4.552966 | 4.516241 | 4.917609 | 4.534512 | 5.110422 | 4.897467 | 4.872773 | 4.796593 | 4.61059 | 4.98962 | 4.416097 |
| ARHGAP18 | NA | NA | NA | NA | NA | NA | NA | NA | NA | NA | NA | NA | NA |
| LOC286191 | NA | NA | NA | NA | NA | NA | NA | NA | NA | NA | NA | NA | NA |
| EFEMP1 | 4.872722 | 7.492164 | 4.611769 | 4.363339 | 5.980384 | 4.133283 | 4.651042 | 6.972267 | 4.747434 | 5.768812 | 4.434778 | 6.887437 | 5.003705 |
| LOC100996760 | NA | NA | NA | NA | NA | NA | NA | NA | NA | NA | NA | NA | NA |

| **Gene** | **GSM657639** | **GSM657640** | **GSM657641** | **GSM657642** | **GSM657643** | **GSM657644** | **GSM657645** | **GSM657646** | **GSM657647** | **GSM657648** | **GSM657649** | **GSM657650** | **GSM657651** |
| --- | --- | --- | --- | --- | --- | --- | --- | --- | --- | --- | --- | --- | --- |
| CD24 | 6.11438 | 8.396634 | 7.383539 | 7.920979 | 9.643579 | 8.538618 | 9.597393 | 9.845194 | 7.861356 | 9.494234 | 8.147106 | 5.96313 | 7.970409 |
| CLDN3 | 4.270587 | 6.03422 | 8.127294 | 8.247514 | 7.408716 | 8.484807 | 9.203678 | 5.812533 | 6.450929 | 9.776492 | 7.597561 | 9.512211 | 8.37929 |
| C1orf106 | 5.882926 | 7.800866 | 6.705122 | 8.286066 | 7.714603 | 9.364351 | 7.525589 | 8.601188 | 7.145569 | 8.503562 | 7.394815 | 8.281815 | 8.305803 |
| CRABP2 | 5.972331 | 8.291705 | 9.080743 | 10.456663 | 9.843051 | 11.009312 | 10.034015 | 9.826742 | 9.171561 | 10.273813 | 8.942262 | 10.608176 | 10.660833 |
| SOX17 | 4.985077 | 6.309 | 6.432509 | 8.792133 | 7.415879 | 7.759493 | 6.659023 | 4.903014 | 5.420386 | 7.787898 | 6.85089 | 5.814436 | 7.87003 |
| ELF3 | 5.161228 | 7.295758 | 6.093238 | 8.702646 | 7.228969 | 8.623131 | 8.013124 | 7.322842 | 6.83472 | 7.174151 | 6.648232 | 7.902229 | 6.254776 |
| EPCAM | 4.565238 | 5.663844 | 8.975821 | 9.083896 | 8.434436 | 8.500518 | 9.230231 | 9.863411 | 5.613005 | 9.333457 | 8.449729 | 8.929525 | 9.348813 |
| SCGB2A1 | 4.383877 | 5.088502 | 7.549869 | 8.992303 | 9.792052 | 8.458054 | 7.034617 | 10.599883 | 5.699975 | 9.787067 | 5.588156 | 4.117006 | 6.840316 |
| KLK6 | 5.456143 | 8.217396 | 8.069393 | 9.755375 | 6.084767 | 9.487808 | 7.789882 | 6.993014 | 9.626668 | 8.889005 | 5.281547 | 7.402987 | 9.852338 |
| MMP7 | 4.406699 | 6.235463 | 6.074585 | 7.06848 | 8.04083 | 8.82904 | 8.231689 | 7.474883 | 5.568813 | 7.803387 | 9.418295 | 8.063705 | 6.210609 |
| CLDN4 | 4.622796 | 5.512599 | 5.315733 | 5.619948 | 5.542671 | 7.266345 | 7.729672 | 6.020782 | 5.473655 | 6.928605 | 5.926726 | 7.847564 | 6.366474 |
| CKS2 | 6.710883 | 5.243656 | 7.714707 | 8.199609 | 8.392903 | 7.022127 | 7.777178 | 8.217633 | 6.709452 | 8.684262 | 6.784354 | 9.931561 | 8.660183 |
| CP | 4.728117 | 6.55684 | 5.816353 | 6.861478 | 6.114842 | 7.392239 | 7.665215 | 7.247303 | 6.719365 | 8.240537 | 7.038697 | 8.832721 | 9.148818 |
| PSAT1 | 5.022173 | 6.01492 | 5.547901 | 6.612524 | 6.25606 | 5.620064 | 5.660398 | 5.321382 | 5.566409 | 5.366445 | 5.490581 | 6.20895 | 6.726107 |
| MECOM | 4.40458 | 5.769535 | 5.401004 | 5.72499 | 6.199488 | 5.779228 | 5.595885 | 4.49129 | 5.298452 | 5.489615 | 4.79589 | 5.499068 | 4.931687 |
| ESRP1 | 5.406252 | 6.63201 | 6.448851 | 8.135355 | 6.824401 | 6.33694 | 6.009079 | 6.093423 | 6.802221 | 7.199424 | 5.031137 | 7.021395 | 7.330518 |
| WFDC2 | 8.681197 | 9.654862 | 10.690097 | 11.434543 | 7.803156 | 11.992987 | 12.095733 | 8.186968 | 10.32484 | 10.999374 | 10.113149 | 11.705326 | 9.851014 |
| CEP55 | 4.263431 | 4.693167 | 5.658334 | 6.629135 | 5.26255 | 5.855116 | 5.390559 | 5.053426 | 4.874959 | 6.321467 | 5.429121 | 5.917852 | 6.70891 |
| MUC1 | 6.577364 | 8.81959 | 7.752945 | 9.226728 | 7.720139 | 8.848095 | 9.34928 | 8.604525 | 7.964459 | 9.089633 | 7.149369 | 9.205796 | 9.034928 |
| MCM2 | 6.37734 | 7.537003 | 7.082338 | 9.082656 | 7.749165 | 8.033658 | 7.216949 | 6.675724 | 6.795947 | 8.424843 | 7.330859 | 8.64097 | 8.923714 |
| FAM83D | NA | NA | NA | NA | NA | NA | NA | NA | NA | NA | NA | NA | NA |
| ZWINT | 5.070812 | 6.027737 | 7.248377 | 8.52249 | 8.307156 | 7.287712 | 7.359283 | 8.300301 | 7.530841 | 8.084482 | 6.382665 | 6.563133 | 8.453899 |
| NEK2 | 4.477607 | 4.994659 | 5.062973 | 5.924187 | 5.990054 | 5.110218 | 5.169077 | 5.090319 | 5.212092 | 5.374321 | 4.443437 | 5.378496 | 5.350915 |
| BUB1B | 5.665648 | 6.161258 | 7.073319 | 7.731678 | 7.03326 | 6.690012 | 6.596456 | 7.553736 | 6.391525 | 7.450698 | 6.421734 | 6.838906 | 8.067063 |
| DLGAP5 | 3.887102 | 4.687283 | 5.178426 | 6.424702 | 4.843774 | 5.052302 | 4.963348 | 5.369854 | 5.229063 | 5.741366 | 4.681138 | 4.355797 | 6.413675 |
| MELK | 6.030364 | 6.845541 | 6.730952 | 7.608191 | 7.451538 | 6.953465 | 7.133617 | 7.331832 | 7.708242 | 6.849068 | 6.348925 | 7.482124 | 7.160294 |
| FZD10 | 5.106202 | 4.885972 | 4.787514 | 4.484549 | 4.597667 | 4.804946 | 5.415812 | 5.700119 | 4.497066 | 4.719974 | 4.931309 | 4.140322 | 4.93237 |
| LPAR3 | 4.771222 | 5.17754 | 5.039784 | 5.827818 | 5.270363 | 5.057698 | 4.401482 | 4.352881 | 4.886852 | 5.708856 | 4.780751 | 4.805004 | 5.091029 |
| ITLN1 | NA | NA | NA | NA | NA | NA | NA | NA | NA | NA | NA | NA | NA |
| LINC01105 | NA | NA | NA | NA | NA | NA | NA | NA | NA | NA | NA | NA | NA |
| ANXA8L1 | 6.648939 | 6.926591 | 6.470697 | 6.022742 | 6.197454 | 6.84645 | 6.852873 | 6.370583 | 7.392187 | 6.542367 | 7.597641 | 6.258859 | 7.569561 |
| DFNA5 | 6.064722 | 5.636189 | 5.739461 | 5.593136 | 5.79834 | 5.21834 | 6.058148 | 5.784095 | 6.110946 | 5.22401 | 6.567883 | 5.046484 | 4.947494 |
| PRG4 | 3.561468 | 4.371534 | 3.995027 | 3.345185 | 3.47847 | 3.265387 | 3.910311 | 3.679587 | 3.82555 | 3.374657 | 3.453906 | 3.16923 | 3.160305 |
| ABCA8 | 9.287064 | 3.996633 | 3.427465 | 3.759953 | 3.874333 | 3.791616 | 3.608678 | 5.491777 | 4.370075 | 3.804433 | 6.876651 | 3.778264 | 4.452873 |
| PROCR | 3.432287 | 3.180962 | 3.458932 | 3.084181 | 3.43777 | 3.231472 | 3.856562 | 4.166817 | 3.72762 | 3.300385 | 5.911341 | 3.314955 | 3.364516 |
| CHGB | 4.900603 | 4.586251 | 3.93245 | 3.782197 | 3.86046 | 3.9772 | 3.693737 | 3.905472 | 3.972025 | 3.767999 | 3.923197 | 3.596338 | 3.767733 |
| AOX1 | 6.331063 | 5.667677 | 5.350568 | 4.800929 | 5.16298 | 5.049101 | 5.023015 | 5.116547 | 5.335188 | 4.850161 | 5.647919 | 4.731611 | 5.074938 |
| CALB2 | 6.308827 | 5.362809 | 5.575438 | 5.041407 | 4.585385 | 5.370638 | 5.292094 | 4.77619 | 5.53302 | 5.067922 | 8.70819 | 4.610349 | 4.638216 |
| HAND2-AS1 | 4.902164 | 5.211762 | 4.948305 | 4.49322 | 4.638761 | 4.760399 | 4.472963 | 4.295518 | 5.267621 | 4.470557 | 4.146941 | 4.357232 | 4.301392 |
| BNC1 | 4.890322 | 5.373639 | 5.181613 | 4.606124 | 4.837429 | 4.742464 | 4.707446 | 7.044287 | 5.316746 | 4.816503 | 4.709832 | 4.336596 | 5.162094 |
| BCHE | 3.683404 | 3.915889 | 3.474106 | 3.394734 | 3.551347 | 3.785245 | 3.582387 | 3.95011 | 4.145244 | 3.324728 | 5.866886 | 3.382137 | 3.302441 |
| CLEC4M | 4.442997 | 4.770218 | 4.338645 | 4.200199 | 4.554379 | 4.333874 | 4.223145 | 4.37345 | 4.515171 | 4.174427 | 3.947218 | 4.375274 | 4.437374 |
| NPY1R | 3.762818 | 3.669416 | 3.431426 | 3.230328 | 4.336189 | 3.245733 | 3.344388 | 3.922558 | 4.323096 | 3.541342 | 3.292977 | 2.998196 | 3.426569 |
| TCEAL2 | 8.954678 | 4.410754 | 3.977819 | 3.985331 | 6.376187 | 3.844949 | 3.605616 | 4.648555 | 4.031467 | 3.331392 | 5.646091 | 3.434997 | 3.897546 |
| MNDA | 4.079442 | 4.396287 | 3.820911 | 3.733987 | 3.902131 | 3.652081 | 3.935465 | 4.292025 | 4.257158 | 4.369672 | 5.924322 | 4.726562 | 3.658408 |
| PDE8B | 5.398067 | 6.043041 | 5.41265 | 5.237029 | 5.330439 | 5.357118 | 5.515249 | 5.267007 | 5.752333 | 5.132318 | 4.886548 | 5.437188 | 5.166381 |
| REEP1 | 4.657721 | 5.401734 | 5.178098 | 5.250356 | 5.287292 | 4.796203 | 4.953367 | 5.195219 | 5.357172 | 4.537432 | 4.393584 | 4.60258 | 4.920765 |
| ADH1C | 3.73046 | 4.00777 | 3.61011 | 3.507164 | 3.702177 | 3.496784 | 3.704828 | 3.869903 | 3.938176 | 3.499389 | 3.577396 | 3.636022 | 3.432867 |
| SPOCK1 | 5.475209 | 6.016792 | 5.581666 | 5.261637 | 5.575645 | 5.928848 | 5.76043 | 5.918592 | 5.290763 | 5.100367 | 6.794183 | 4.726823 | 5.444191 |
| KDR | 4.181714 | 4.395491 | 4.518128 | 4.199774 | 4.424981 | 4.288156 | 4.730493 | 4.525352 | 4.385518 | 4.383662 | 5.84778 | 4.321843 | 4.817511 |
| GADL1 | NA | NA | NA | NA | NA | NA | NA | NA | NA | NA | NA | NA | NA |
| SFRP1 | 5.980015 | 5.146126 | 4.789551 | 4.532652 | 5.409772 | 4.832285 | 6.751001 | 4.430228 | 5.149083 | 4.887018 | 6.907692 | 4.442845 | 4.599957 |
| BAMBI | 6.811053 | 5.566566 | 4.601067 | 4.510152 | 5.217931 | 4.335513 | 4.677395 | 4.720573 | 5.13991 | 4.795929 | 6.326733 | 4.363869 | 5.000446 |
| LGALS2 | 3.839065 | 4.235813 | 4.339447 | 3.669873 | 4.018895 | 3.914273 | 3.600078 | 3.621672 | 4.254046 | 3.790497 | 4.532953 | 5.408269 | 4.374026 |
| DIRAS3 | 7.711139 | 4.440919 | 4.688895 | 4.409937 | 4.259054 | 4.218945 | 4.079702 | 4.241018 | 4.193637 | 4.231576 | 5.011785 | 4.027542 | 4.90665 |
| C21orf62 | 4.36292 | 4.882097 | 4.641505 | 4.263245 | 4.419895 | 4.260254 | 4.308161 | 4.386312 | 4.814478 | 4.56388 | 3.907891 | 4.357904 | 4.548847 |
| TCEAL7 | NA | NA | NA | NA | NA | NA | NA | NA | NA | NA | NA | NA | NA |
| OGN | 5.448963 | 3.453315 | 3.575613 | 3.121406 | 3.049612 | 3.251587 | 3.189269 | 3.399372 | 3.203841 | 3.096875 | 4.176762 | 3.159622 | 3.178393 |
| SYT4 | NA | NA | NA | NA | NA | NA | NA | NA | NA | NA | NA | NA | NA |
| LOC100506718 | 6.742628 | 5.560053 | 5.348454 | 4.804185 | 4.956555 | 5.324421 | 4.965049 | 5.458913 | 5.477741 | 4.502542 | 6.589894 | 4.230459 | 4.947574 |
| GPRASP1 | 8.882409 | 5.541825 | 5.210457 | 4.721247 | 4.982373 | 4.669285 | 5.020367 | 5.596719 | 5.430717 | 4.506921 | 4.993418 | 4.520234 | 5.072416 |
| NELL2 | 5.637977 | 5.546949 | 5.990513 | 5.566468 | 5.409936 | 5.60069 | 5.451692 | 5.530309 | 6.261651 | 5.58183 | 5.709002 | 5.431711 | 5.881764 |
| AADACL2 | NA | NA | NA | NA | NA | NA | NA | NA | NA | NA | NA | NA | NA |
| GHR | 4.66683 | 3.932769 | 3.40436 | 3.947726 | 3.82959 | 3.708672 | 4.068347 | 4.931025 | 4.163616 | 3.514165 | 6.065456 | 3.434435 | 4.283968 |
| ADH1B | 4.153378 | 4.385687 | 3.849038 | 3.553155 | 3.805549 | 3.770602 | 3.741699 | 4.415823 | 3.970089 | 3.572023 | 7.453992 | 3.609469 | 3.575154 |
| MGARP | NA | NA | NA | NA | NA | NA | NA | NA | NA | NA | NA | NA | NA |
| IGFBP6 | 8.607883 | 5.772994 | 5.746438 | 5.336516 | 6.195388 | 7.045372 | 6.120428 | 5.803007 | 7.101827 | 5.553351 | 8.319295 | 5.452281 | 6.787425 |
| GFPT2 | 6.155597 | 6.438601 | 5.430777 | 5.325667 | 5.953378 | 5.789378 | 5.875323 | 5.306573 | 6.180287 | 5.170207 | 8.282069 | 5.158727 | 5.617566 |
| OLFML1 | 6.381415 | 5.349108 | 5.431089 | 5.162177 | 5.408787 | 5.799683 | 5.387267 | 5.384711 | 5.762171 | 5.210242 | 7.485517 | 4.884536 | 5.16605 |
| NAP1L3 | 5.617845 | 4.354481 | 3.59216 | 3.611824 | 4.134228 | 4.007996 | 4.54984 | 4.196094 | 3.491291 | 3.453414 | 4.920775 | 3.370948 | 5.015714 |
| HBB | 9.43072 | 6.986234 | 6.848555 | 6.314566 | 6.333607 | 11.168957 | 6.915453 | 6.952287 | 7.854332 | 6.236157 | 12.099606 | 10.492436 | 8.750674 |
| DAPK1-IT1 | NA | NA | NA | NA | NA | NA | NA | NA | NA | NA | NA | NA | NA |
| ALDH1A1 | 5.711654 | 3.693846 | 5.989491 | 3.304333 | 3.509184 | 3.601515 | 3.294919 | 3.480466 | 3.912901 | 3.311707 | 5.424444 | 3.809981 | 3.378788 |
| LRRN4 | NA | NA | NA | NA | NA | NA | NA | NA | NA | NA | NA | NA | NA |
| HAS1 | 6.972505 | 5.674503 | 4.90863 | 4.586593 | 5.361251 | 5.648792 | 5.250383 | 4.6525 | 5.967193 | 4.897197 | 7.811165 | 4.619192 | 5.078957 |
| LXN | 6.818766 | 6.12209 | 5.705009 | 6.004314 | 6.321548 | 6.187601 | 4.808466 | 6.336568 | 5.244229 | 6.563387 | 9.555753 | 7.140077 | 7.48353 |
| CLDN15 | 7.152123 | 7.492445 | 7.914733 | 7.252492 | 7.464511 | 7.456871 | 7.352106 | 7.191781 | 7.384134 | 7.326325 | 7.307578 | 6.982532 | 8.223639 |
| PDGFD | 8.532608 | 5.373617 | 6.891474 | 5.261087 | 5.387472 | 6.316284 | 5.590128 | 6.396885 | 5.914019 | 5.286674 | 6.105544 | 4.809004 | 5.650587 |
| PRSS35 | NA | NA | NA | NA | NA | NA | NA | NA | NA | NA | NA | NA | NA |
| HBA2 | 9.433941 | 7.991045 | 8.119432 | 6.134437 | 6.406769 | 11.891629 | 7.256756 | 6.120213 | 8.243494 | 6.300225 | 12.119334 | 9.845797 | 8.548931 |
| WNT2B | 5.783402 | 5.319647 | 5.636036 | 4.656284 | 5.034031 | 5.013489 | 4.808017 | 4.970722 | 5.026451 | 4.790288 | 4.618809 | 4.711411 | 4.981584 |
| CHRDL1 | 5.438396 | 5.734236 | 5.156883 | 5.593107 | 6.311956 | 4.86913 | 5.185839 | 5.882614 | 5.037632 | 5.12419 | 7.413265 | 4.50194 | 7.174294 |
| LOC101930363 | 5.777996 | 4.031479 | 3.744284 | 5.280634 | 3.600022 | 3.888603 | 3.733567 | 3.973434 | 4.251579 | 3.731851 | 3.429968 | 4.505195 | 5.260826 |
| PAPSS2 | 5.791887 | 5.080927 | 5.161009 | 4.708061 | 5.141764 | 4.965422 | 4.9313 | 5.567789 | 5.254003 | 4.757473 | 6.774344 | 4.882732 | 4.831728 |
| FLNC | 6.777881 | 6.896155 | 6.591697 | 5.548127 | 6.12008 | 6.905751 | 5.67928 | 6.382602 | 6.093939 | 5.752071 | 8.307008 | 5.900583 | 7.191408 |
| PLPP1 | 5.955999 | 5.574684 | 5.896395 | 5.018413 | 5.590492 | 6.108637 | 6.07646 | 5.683523 | 5.324821 | 5.405708 | 8.357629 | 5.447816 | 5.482307 |
| AQP9 | 5.711146 | 6.34311 | 6.325512 | 5.619974 | 5.842999 | 5.872236 | 5.930327 | 5.729789 | 5.684947 | 6.200497 | 6.922817 | 5.366075 | 7.317898 |
[truncated: 244,212 more chars]
